# Supplementary material for: Low Child Survival Index in a Multi-Dimensionally Poor Amerindian Population in Venezuela
Source: PLoS One. 2013 Dec 31;8(12):e85638. doi: 10.1371/journal.pone.0085638 (PMC3877389; doi:10.1371/journal.pone.0085638)
Supplement: Dataset S1 — Data of child deaths, CSI determinants, and characteristics of the family dwelling. (XLS) [file pone.0085638.s001.xls]

## Sheet: Child Deaths
			Child Mortality							Age of the dead children					Sex			Causes of death
Mother's ID	Municipality	Subregion	Live births	still living children	live births who died	Stillbirths	Dead Children. 2011	CSI (Child Survival Index)		Neonatal	< 1 year	1 - 5 years	6 - 12 years		Male	Female		Diarrhea	Pneumonia. RTI	Other	Other Causes:
1	PED	PED-Manamo	1	1	0	0	0	1							0	0
4	PED	PED-Manamo	15	3	12	0	0	0.2			4	8			8	4		8	2	2	Cholera (2)
5	PED	PED-Manamo	5	3	2	0	0	0.6			2				0	2		1		1	Unknown (1)
6	PED	PED-Manamo	7	5	2	0	1	0.714286		1	1				1	1		1		1	Unknown (1)
11	PED	PED-Manamo	3	3	0	0	0	1							0	0
12	PED	PED-Manamo	14	9	5	0	0	0.642857		1	3	1			3	2		5
13	PED	PED-Manamo	3	3	0	0	0	1							0	0
14	PED	PED-Manamo	3	1	2	1	0	0.333333			2				1	1		2
27	PED	PED-Manamo	13	4	9	1	0	0.307692			3	6			7	2				9	Febrile Syndrome Unspecified (9)
28	PED	PED-Manamo	8	7	1	0	1	0.875				1			1	0			1
29	PED	PED-Manamo	1	1	0	0	0	1							0	0
30	PED	PED-Manamo	9	3	6	0	1	0.333333			4	2			4	2		5	1
31	PED	PED-Manamo	10	4	6	1	0	0.4		5		1			4	2			1	5	Preterm-Birth (4) / Birth Asphyxia-Meconium aspiration (1)
32	PED	PED-Manamo	2	1	1	0	0	0.5		1					1	0				1	Preterm-Birth (1)
33	PED	PED-Manamo	12	6	6	0	0	0.5			1	4	1		3	3		5		1	Maternal death (during labor) (1)
34	PED	PED-Manamo	4	2	2	0	0	0.5		1	1				1	1				2	Birth Asphyxia-Meconium aspiration (1) / malnutrition(1)
35	PED	PED-Manamo	5	4	1	0	0	0.8				1			1	0			1
36	PED	PED-Manamo	8	7	1	3	0	0.875					1		1	0			1
37	PED	PED-Manamo	4	4	0	0	0	1							0	0
38	PED	PED-Manamo	3	2	1	0	0	0.666667			1				1	0		1
39	PED	PED-Manamo	5	4	1	0	0	0.8				1			1	0		1
40	PED	PED-Manamo	12	6	6	1	0	0.5		1	4	1			3	3		2	1	3	Febrile Syndrome Unspecified(1) / Preterm-Birth (1) / Edema (1)
41	PED	PED-Manamo	1	1	0	0	0	1							0	0
42	PED	PED-Manamo	7	7	0	0	0	1							0	0
43	PED	PED-Manamo	14	12	2	0	0	0.857143			2				1	1		2
44	PED	PED-Manamo	8	4	4	0	0	0.5			2	2			2	2		3	1
45	PED	PED-Manamo	5	3	2	1	0	0.6		1		1			0	2		2
46	PED	PED-Manamo	3	2	1	0	0	0.666667				1			1	0				1	Unknown (1)
47	PED	PED-Manamo	3	1	2	0	0	0.333333			1	1			1	1				2	Unknown (2)
48	PED	PED-Manamo	5	4	1	0	0	0.8				1			1	0		1
49	PED	PED-Manamo	6	5	1	1	0	0.833333				1			0	1		1
62	PED	PED-Manamo	5	3	2	0	0	0.6		2					1	1				2	Preterm-Birth (2)
63	PED	PED-Manamo	10	10	0	0	0	1							0	0
64	PED	PED-Manamo	8	5	3	0	0	0.625			1	1	1		1	2		2		1	Electrocution (1)
65	PED	PED-Manamo	10	8	2	0	0	0.8		1	1				2	0		2
66	PED	PED-Manamo	2	2	0	0	0	1							0	0
67	PED	PED-Manamo	3	3	0	0	0	1							0	0
68	PED	PED-Manamo	10	7	3	0	0	0.7			1	2			2	1		1	2
69	PED	PED-Manamo	9	5	4	0	0	0.555556			3	1			3	1		1	2	1	Dengue Fever (1)
70	PED	PED-Manamo	13	7	6	0	0	0.538462		3	2	1			5	1		2	4
71	PED	PED-Manamo	11	8	3	0	0	0.727273				2	1		0	3		2	1
72	PED	PED-Manamo	5	4	1	0	0	0.8				1			1	0			1
73	PED	PED-Manamo	1	1	0	0	0	1							0	0
74	PED	PED-Manamo	9	6	3	1	0	0.666667		1	2				0	3		3
75	PED	PED-Manamo	9	6	3	0	0	0.666667			3				3	0		3
76	PED	PED-Manamo	10	7	3	0	0	0.7			1	2			2	1		3
77	PED	PED-Manamo	4	2	2	0	0	0.5			2				2	0			1	1	Febrile Syndrome Unspecified (1)
78	PED	PED-Manamo	1	1	0	0	0	1							0	0
79	PED	PED-Manamo	3	2	1	0	0	0.666667				1			1	0				1	Mumps - Impetigo (1)
80	PED	PED-Manamo	10	8	2	0	0	0.8				2			2	0		2
81	PED	PED-Manamo	1	1	0	0	0	1							0	0
82	PED	PED-Manamo	6	5	1	2	0	0.833333				1			1	0		1
83	PED	PED-Manamo	4	4	0	0	0	1							0	0
84	PED	PED-Manamo	9	3	6	0	0	0.333333			6				3	3		3	2	1	Unknown (1)
85	PED	PED-Manamo	3	2	1	1	0	0.666667			1				0	1		1
86	PED	PED-Manamo	8	4	4	1	0	0.5			4				2	2		4
87	PED	PED-Manamo	2	1	1	0	0	0.5			1				1	0				1	Unknown (1)
88	PED	PED-Manamo	4	3	1	1	0	0.75			1				1	0				1	Febrile Syndrome Unspecified (1)
89	PED	PED-Manamo	3	3	0	0	0	1							0	0
90	PED	PED-Manamo	2	2	0	0	0	1							0	0
91	PED	PED-Manamo	4	2	2	0	0	0.5			1	1			1	1		2
92	PED	PED-Manamo	5	5	0	0	0	1							0	0
93	PED	PED-Manamo	4	2	2	0	0	0.5			1	1			1	1		1	1
94	PED	PED-Manamo	3	3	0	0	0	1							0	0
95	PED	PED-Manamo	2	2	0	0	0	1							0	0
96	PED	PED-Manamo	10	6	4	0	0	0.6			4				2	2			4
97	PED	PED-Manamo	8	8	0	0	0	1							0	0
98	PED	PED-Manamo	12	11	1	2	0	0.916667			1				1	0		1
2	PED	PED-Waranoko	8	8	0	0	0	1							0	0
3	PED	PED-Waranoko	4	2	2	0	0	0.5			2				0	2		2
7	PED	PED-Waranoko	1	1	0	0	0	1							0	0
8	PED	PED-Waranoko	11	6	5	0	1	0.545455		1	3	1			2	3			5
9	PED	PED-Waranoko	3	3	0	0	0	1							0	0
10	PED	PED-Waranoko	5	3	2	0	0	0.6			1	1			2	0			2
15	PED	PED-Waranoko	7	4	3	0	0	0.571429			3				2	1			3
16	PED	PED-Waranoko	4	4	0	0	0	1							0	0
17	PED	PED-Waranoko	8	4	4	0	0	0.5			3	1			3	1		2	1	1	Unknown (1)
18	PED	PED-Waranoko	5	4	1	0	0	0.8			1				1	0		1
19	PED	PED-Waranoko	7	7	0	0	0	1							0	0
20	PED	PED-Waranoko	11	7	4	0	0	0.636364			2	2			3	1		3	1
21	PED	PED-Waranoko	9	5	4	0	0	0.555556			4				2	2		2	2
22	PED	PED-Waranoko	9	3	6	0	0	0.333333			5		1		0	6			5	1	Witchcraft (1)
23	PED	PED-Waranoko	6	5	1	1	0	0.833333			1				0	1			1
24	PED	PED-Waranoko	13	8	5	0	0	0.615385			5				3	2				5	Febrile Syndrome Unspecified (5)
25	PED	PED-Waranoko	9	3	6	0	0	0.333333			1	5			3	3		4	2
26	PED	PED-Waranoko	7	3	4	0	0	0.428571			3	1			3	1				4	Febrile Syndrome Unspecified (2) / Gastroenteritis (2)
50	PED	PED-Waranoko	12	8	4	0	0	0.666667			2	2			3	1		2	1	1	Unknown (1)
51	PED	PED-Waranoko	7	3	4	0	0	0.428571			1	3			4	0		2	1	1	Gastroenteritis (1)
52	PED	PED-Waranoko	11	1	10	0	0	0.0909091			10				5	5		6	4
53	PED	PED-Waranoko	2	1	1	0	0	0.5			1				0	1			1
54	PED	PED-Waranoko	10	4	6	0	2	0.4		1	5				4	2			5	1	Impetigo (1)
55	PED	PED-Waranoko	11	6	5	0	0	0.545455			3	2			4	1		2	1	2	Witchcraft (1) / Malnutrition - Candidal Stomatitis (1)
56	PED	PED-Waranoko	4	2	2	0	0	0.5			2				1	1			2
57	PED	PED-Waranoko	7	7	0	0	0	1							0	0
58	PED	PED-Waranoko	5	4	1	0	0	0.8				1			0	1				1	Unknown (1)
59	PED	PED-Waranoko	2	2	0	0	0	1							0	0
60	PED	PED-Waranoko	5	4	1	0	0	0.8				1			0	1		1
61	PED	PED-Waranoko	5	3	2	0	0	0.6			1	1			1	1		1	1
1	TUC	Makareo-Mariusa	12	9	3	2	0	0.75			1	2			3	0		1		2	Drowning (1) / CNS Infection (1)
2	TUC	Makareo-Mariusa	14	11	3	0	0	0.785714			3				3	0			3
4	TUC	Makareo-Mariusa	5	1	4	0	0	0.2		1	3				2	2		2		2	Preterm-Birth (1) / Impetigo (1)
5	TUC	Makareo-Mariusa	10	4	6	0	1	0.4			2	4			3	3		2	3	1	Malnutrition - Candidal Stomatitis (1)
13	TUC	Makareo-Mariusa	2	1	1	0	0	0.5				1			0	1				1	Unknown (1)
14	TUC	Makareo-Mariusa	15	8	7	0	0	0.533333			7				5	2		3	4
15	TUC	Makareo-Mariusa	8	2	6	0	0	0.25			6				4	2		6
16	TUC	Makareo-Mariusa	8	4	4	0	0	0.5			4				2	2		4
17	TUC	Makareo-Mariusa	4	3	1	0	0	0.75			1				1	0			1
18	TUC	Makareo-Mariusa	3	2	1	0	1	0.666667			1				0	1			1
19	TUC	Makareo-Mariusa	1	1	0	0	0	1							0	0
20	TUC	Makareo-Mariusa	2	2	0	0	0	1							0	0
21	TUC	Makareo-Mariusa	7	5	2	0	0	0.714286			1	1			1	1		2
31	TUC	Makareo-Mariusa	4	4	0	1	0	1							0	0
32	TUC	Makareo-Mariusa	3	3	0	1	0	1							0	0
33	TUC	Makareo-Mariusa	6	4	2	0	0	0.666667				2			2	0		2
34	TUC	Makareo-Mariusa	7	7	0	0	0	1							0	0
35	TUC	Makareo-Mariusa	7	5	2	0	0	0.714286		1	1				1	1				2	Malnutrition - Candidal Stomatitis (1) / Preterm-Birth (1)
36	TUC	Makareo-Mariusa	1	0	1	0	0	0				1			0	1		1
37	TUC	Makareo-Mariusa	5	1	4	0	0	0.2			2	2			3	1		1	3
38	TUC	Makareo-Mariusa	5	1	4	0	0	0.2			1	3			3	1			4
39	TUC	Makareo-Mariusa	2	1	1	2	0	0.5			1				0	1			1
40	TUC	Makareo-Mariusa	12	9	3	0	0	0.75		1	2				2	1			1	2	Trauma (1) / Congenital abnormality (1)
41	TUC	Makareo-Mariusa	14	4	10	0	0	0.285714			2	8			5	5		10
42	TUC	Makareo-Mariusa	8	7	1	0	0	0.875				1			1	0		1
43	TUC	Makareo-Mariusa	1	1	0	0	0	1							0	0
44	TUC	Makareo-Mariusa	3	2	1	0	1	0.666667			1				1	0				1	Febrile Syndrome Unspecified (1)
67	TUC	Makareo-Mariusa	3	3	0	0	0	1							0	0
68	TUC	Makareo-Mariusa	2	0	2	0	0	0			1	1			1	1		2
69	TUC	Makareo-Mariusa	10	2	8	0	0	0.2			5	3			5	3		5	3
70	TUC	Makareo-Mariusa	5	5	0	0	0	1							0	0
71	TUC	Makareo-Mariusa	12	5	7	0	0	0.416667			7				2	5		7
72	TUC	Makareo-Mariusa	8	3	5	1	1	0.375		1	1	3			1	4		3	1	1	Birth asphyxia - Meconium Aspiration (1)
73	TUC	Makareo-Mariusa	11	4	7	7	1	0.363636		2	1	4			3	4		1	3	3	Febrile Syndrome Unspecified (3)
74	TUC	Makareo-Mariusa	7	3	4	0	0	0.428571				4			2	2		2	2
75	TUC	Makareo-Mariusa	12	8	4	0	0	0.666667				4			2	2		3	1
76	TUC	Makareo-Mariusa	12	2	10	0	0	0.166667			9	1			4	6		9		1	Febrile Syndrome Unspecified (1)
77	TUC	Makareo-Mariusa	2	2	0	0	0	1							0	0
78	TUC	Makareo-Mariusa	4	2	2	0	0	0.5			1	1			1	1		1	1
79	TUC	Makareo-Mariusa	5	3	2	0	0	0.6				2			0	2		1	1
80	TUC	Makareo-Mariusa	13	2	11	0	0	0.153846				9	2		5	6		8	3
81	TUC	Makareo-Mariusa	13	7	6	0	0	0.538462		1	5				1	5		6
82	TUC	Makareo-Mariusa	4	4	0	0	0	1							0	0
83	TUC	Makareo-Mariusa	20	5	15	0	0	0.25			9	4	2		6	9		15
84	TUC	Makareo-Mariusa	4	3	1	0	0	0.75			1				1	0				1	Unknown (1)
85	TUC	Makareo-Mariusa	1	1	0	0	0	1							0	0
86	TUC	Makareo-Mariusa	12	6	6	0	0	0.5			4	2			4	2		4	2
87	TUC	Makareo-Mariusa	10	0	10	0	0	0			7	3			7	3		7	3
88	TUC	Makareo-Mariusa	2	2	0	0	0	1							0	0
89	TUC	Makareo-Mariusa	1	1	0	0	0	1							0	0
90	TUC	Makareo-Mariusa	2	2	0	1	0	1							0	0
91	TUC	Makareo-Mariusa	1	1	0	0	0	1							0	0
6	TUC	Alto Delta	2	1	1	0	0	0.5			1				1	0				1	Witchcraft (1)
7	TUC	Alto Delta	6	5	1	0	0	0.833333				1			0	1		1
8	TUC	Alto Delta	8	6	2	0	0	0.75			1	1			1	1		1	1
9	TUC	Alto Delta	6	6	0	0	0	1							0	0
10	TUC	Alto Delta	5	3	2	0	0	0.6				2			2	0				2	Witchcraft (2)
11	TUC	Alto Delta	5	5	0	0	0	1							0	0
12	TUC	Alto Delta	3	3	0	0	0	1							0	0
22	TUC	Alto Delta	8	6	2	0	0	0.75			2				2	0		1		1	Unknown (1)
23	TUC	Alto Delta	5	5	0	0	0	1							0	0
24	TUC	Alto Delta	6	4	2	0	0	0.666667		1	1				2	0		1		1	Preterm-Birth (1)
25	TUC	Alto Delta	5	4	1	2	0	0.8				1			0	1		1
26	TUC	Alto Delta	10	7	3	0	0	0.7				3			2	1		2	1
27	TUC	Alto Delta	5	5	0	0	0	1							0	0
28	TUC	Alto Delta	5	3	2	0	0	0.6				2			1	1				2	Febrile Syndrome Unspecified (2)
29	TUC	Alto Delta	7	6	1	1	0	0.857143				1			1	0			1
30	TUC	Alto Delta	6	4	2	0	0	0.666667		1		1			2	0		1		1	Unknown (1)
45	TUC	Alto Delta	5	4	1	1	0	0.8				1			0	1		1
46	TUC	Alto Delta	2	2	0	0	0	1							0	0
47	TUC	Alto Delta	1	1	0	0	0	1							0	0
48	TUC	Alto Delta	6	1	5	0	1	0.166667			1	3	1		4	1		4		1	Childhood TB (1)
49	TUC	Alto Delta	7	4	3	2	0	0.571429			3				1	2		3
50	TUC	Alto Delta	6	5	1	3	0	0.833333			1				0	1		1
51	TUC	Alto Delta	2	2	0	0	0	1							0	0
52	TUC	Alto Delta	9	7	2	1	0	0.777778		1		1			1	1		1		1	Birth Asphyxia-Meconium aspiration (1)
53	TUC	Alto Delta	11	7	4	0	0	0.636364			1	3			3	1		2		2	Drowning (1) / Toxic effect of unspecified Substances (1)
54	TUC	Alto Delta	7	6	1	2	0	0.857143				1			1	0		1
55	TUC	Alto Delta	8	6	2	0	0	0.75		1		1			1	1		1		1	Congenital abnormality (1)
56	TUC	Alto Delta	2	2	0	0	0	1							0	0
57	TUC	Alto Delta	3	3	0	0	0	1							0	0
58	TUC	Alto Delta	10	10	0	0	0	1							0	0
59	TUC	Alto Delta	7	5	2	1	0	0.714286				2			2	0		2
60	TUC	Alto Delta	1	1	0	0	0	1							0	0
61	TUC	Alto Delta	10	5	5	0	0	0.5			2	3			1	4		1		4	witchcraft (1) /Febrile Syndrome Unspecified (1) / Malnutrition (1) / Impetigo (1)
62	TUC	Alto Delta	6	5	1	0	0	0.833333				1			1	0		1
63	TUC	Alto Delta	13	5	8	1	0	0.384615			3	5			6	2		7	1
64	TUC	Alto Delta	4	4	0	1	0	1							0	0
65	TUC	Alto Delta	1	1	0	0	0	1							0	0
66	TUC	Alto Delta	3	3	0	0	0	1							0	0
500	AD	Alto Delta	11	9	2	1	0	0.818182		1	1				0	2		1		1	Pertussis (1)
1	AD	Guayo	4	4	0	0	0	1							0	0
2	AD	Guayo	2	2	0	0	0	1							0	0
6	AD	Guayo	3	2	1	0	0	0.666667		1					1	0				1	Unknown (1)
7	AD	Guayo	9	8	1	1	0	0.888889			1				1	0			1
8	AD	Guayo	2	2	0	0	0	1							0	0
9	AD	Guayo	1	1	0	0	0	1							0	0
13	AD	Guayo	8	6	2	0	0	0.75			2				1	1		2
14	AD	Guayo	9	8	1	0	0	0.888889			1				0	1		1
15	AD	Guayo	1	1	0	0	0	1							0	0
16	AD	Guayo	1	0	1	0	0	0			1				1	0				1	Drowning (1)
17	AD	Guayo	8	7	1	0	0	0.875			1				1	0				1	Gastroenteritis (1)
18	AD	Guayo	1	1	0	0	0	1							0	0
19	AD	Guayo	3	1	2	0	0	0.333333			2				1	1		2
20	AD	Guayo	9	3	6	0	0	0.333333			2	4			5	1		4	2
21	AD	Guayo	10	8	2	0	0	0.8			1	1			1	1		2
22	AD	Guayo	2	1	1	2	1	0.5			1				1	0		1
23	AD	Guayo	10	7	3	0	0	0.7			2	1			3	0		3
24	AD	Guayo	7	6	1	0	0	0.857143		1					1	0				1	Birth Asphyxia - Meconium aspiration (1)
25	AD	Guayo	6	5	1	0	0	0.833333				1			1	0				1	Drowning (1)
29	AD	Guayo	7	7	0	3	0	1							0	0
30	AD	Guayo	1	1	0	0	0	1							0	0
31	AD	Guayo	3	3	0	0	0	1							0	0
35	AD	Guayo	7	4	3	2	0	0.571429				3			2	1		3
36	AD	Guayo	2	2	0	0	0	1							0	0
37	AD	Guayo	1	3	0	0	0	3							0	0
41	AD	Guayo	2	1	1	0	0	0.5			1				1	0		1
42	AD	Guayo	8	5	3	0	0	0.625				3			1	2		3
43	AD	Guayo	8	6	2	0	0	0.75		1	1				2	0		1		1	Birth Asphyxia - Meconium aspiration (1)
44	AD	Guayo	5	3	2	0	0	0.6				2			0	2		2
45	AD	Guayo	2	1	1	0	0	0.5		1					0	1				1	Unknown (1)
46	AD	Guayo	5	3	2	1	0	0.6			1	1			2	0		2
47	AD	Guayo	8	8	0	0	0	1							0	0
48	AD	Guayo	3	3	0	0	0	1							0	0
49	AD	Guayo	12	11	1	0	0	0.916667					1		0	1				1	AIDS (1)
50	AD	Guayo	5	4	1	0	0	0.8			1				1	0			1
51	AD	Guayo	13	5	8	0	0	0.384615		1	3	4			4	4		3	4	1	Birth Asphyxia - Meconium aspiration (1)
52	AD	Guayo	6	4	2	2	0	0.666667			1	1			1	1		2
56	AD	Guayo	3	2	1	0	0	0.666667		1					1	0				1	Preterm-Birth (1)
57	AD	Guayo	12	6	6	0	0	0.5		1	2	3			4	2		5		1	Preterm-Birth (1)
58	AD	Guayo	7	3	4	0	0	0.428571			2	1	1		3	1		2		2	Trauma (1) / malnutrition (1)
71	AD	Guayo	10	5	5	0	0	0.5			4		1		1	4		3	1	1	Febrile Syndrome Unspecified (1)
72	AD	Guayo	7	7	0	0	0	1							0	0
73	AD	Guayo	7	4	3	0	0	0.571429			1	2			1	2		3
74	AD	Guayo	13	9	4	0	0	0.692308		1	3				3	1		2	1	1	Birth Trauma (1)
75	AD	Guayo	14	6	8	0	0	0.428571			2	4	2		6	2		1	3	4	Pertussis (2) / Gastroenteritis (1) / Ascariasis - Intestinal Obstruction (1)
76	AD	Guayo	3	2	1	0	0	0.666667			1				1	0			1
77	AD	Guayo	1	1	0	0	0	1							0	0
78	AD	Guayo	6	5	1	0	0	0.833333			1				1	0			1
79	AD	Guayo	1	1	0	0	0	1							0	0
80	AD	Guayo	6	3	3	2	0	0.5		1		2			3	0			1	2	Malnutrition (2)
81	AD	Guayo	7	6	1	1	0	0.857143		1					1	0				1	Birth Asphyxia - Meconium aspiration (1)
82	AD	Guayo	5	4	1	1	0	0.8		1					0	1				1	Preterm Birth -IRDS (1)
83	AD	Guayo	9	1	7	0	0	0.111111			6	1			6	1		7
84	AD	Guayo	9	6	3	0	0	0.666667			1	2			0	3		2	1
85	AD	Guayo	4	3	1	0	0	0.75			1				1	0		1
86	AD	Guayo	4	3	1	0	0	0.75			1				0	1		1
87	AD	Guayo	6	2	4	0	0	0.333333			2	1	1		1	3		3		1	Unknown (1)
88	AD	Guayo	2	1	1	0	0	0.5				1			1	0				1	Gastroenteritis (1)
89	AD	Guayo	5	3	2	0	0	0.6				1	1		2	0			1	1	Gastroenteritis (1)
90	AD	Guayo	7	3	4	2	0	0.428571		1		2	1		4	0				4	Drowning (2) / Unknown (2)
91	AD	Guayo	9	5	4	0	0	0.555556				4			2	2		4
92	AD	Guayo	5	2	3	0	0	0.4		1	2				3	0		3
93	AD	Guayo	1	1	0	6	0	1							0	0
94	AD	Guayo	2	2	0	0	0	1							0	0
95	AD	Guayo	1	1	0	0	0	1							0	0
96	AD	Guayo	1	1	0	0	0	1							0	0
97	AD	Guayo	11	6	5	0	0	0.545455			2	3			3	2		5
98	AD	Guayo	6	4	2	1	0	0.666667			1	1			1	1		1	1
104	AD	Guayo	11	11	0	1	0	1							0	0
105	AD	Guayo	6	2	4	1	1	0.333333		2	1	1			3	1		3		1	Birth Trauma (1)
106	AD	Guayo	9	5	4	0	0	0.555556			4				1	3		3	1
107	AD	Guayo	7	5	2	0	0	0.714286		1	1				1	1			1	1	Birth Asphyxia - Meconium aspiration (1)
108	AD	Guayo	8	8	0	1	0	1							0	0
109	AD	Guayo	3	1	2	0	0	0.333333			1	1			1	1		1	1
110	AD	Guayo	4	4	0	2	0	1							0	0
111	AD	Guayo	6	5	1	0	0	0.833333				1			0	1		1
112	AD	Guayo	6	4	2	0	0	0.666667		1	1				1	1		1	1
113	AD	Guayo	6	3	3	0	0	0.5		3					2	1				3	Unknown (3)
114	AD	Guayo	9	6	3	2	0	0.666667		1	2				1	2		1	1	1	Preterm Birth -IRDS (1)
115	AD	Guayo	4	4	0	0	0	1							0	0
116	AD	Guayo	2	2	0	0	0	1							0	0
117	AD	Guayo	1	1	0	0	0	1							0	0
118	AD	Guayo	4	3	1	2	0	0.75			1				0	1		1
119	AD	Guayo	9	3	6	0	0	0.333333			2	4			2	4		5		1	Chickenpox (1)
120	AD	Guayo	1	1	0	0	0	1							0	0
121	AD	Guayo	13	10	3	0	0	0.769231			1	2			1	2		3
122	AD	Guayo	4	3	1	0	0	0.75				1			1	0		1
123	AD	Guayo	2	2	0	0	0	1							0	0
124	AD	Guayo	5	4	1	0	1	0.8				1			1	0			1
125	AD	Guayo	6	5	1	1	0	0.833333			1				1	0		1
126	AD	Guayo	3	3	0	0	0	1							0	0
127	AD	Guayo	10	4	6	0	1	0.4			2	3	1		5	1		3	3
128	AD	Guayo	7	6	1	0	0	0.857143				1			1	0		1
129	AD	Guayo	5	4	1	0	0	0.8				1			1	0		1
130	AD	Guayo	6	3	3	2	0	0.5		2	1				1	2				3	Preterm-Birth IRDS (2) / Infanticide (1)
131	AD	Guayo	8	6	2	0	0	0.75			1	1			2	0		1		1	Malnutrition (1)
132	AD	Guayo	5	3	2	0	0	0.6		1	1				1	1		1	1
133	AD	Guayo	4	4	0	0	0	1							0	0
139	AD	Guayo	1	1	0	0	0	1							0	0
140	AD	Guayo	7	5	2	0	0	0.714286				2			2	0		1	1
141	AD	Guayo	3	2	1	0	0	0.666667				1			1	0		1
142	AD	Guayo	10	5	5	0	0	0.5		1	1	3			0	5				5	Febrile Syndrome Unspecified (1) / Gastroenteritis (3) / Unknown (1)
143	AD	Guayo	4	3	1	0	0	0.75				1			0	1			1
144	AD	Guayo	10	7	3	3	0	0.7				2	1		2	1			2	1	CNS Infection (1)
145	AD	Guayo	6	5	1	0	0	0.833333		1					0	1				1	Unknown (1)
146	AD	Guayo	9	7	2	0	0	0.777778			1	1			0	2		2
147	AD	Guayo	1	1	0	0	0	1							0	0
148	AD	Guayo	6	4	2	0	1	0.666667			1	1			1	1		2
154	AD	Guayo	3	3	0	1	0	1							0	0
155	AD	Guayo	13	5	8	0	0	0.384615			6	2			5	3		8
156	AD	Guayo	13	8	5	3	0	0.615385		1	1	3			4	1		4		1	Birth Asphyxia - Meconium aspiration (1)
157	AD	Guayo	0	0	0	1	0	0							0	0
158	AD	Guayo	7	6	1	2	0	0.857143			1				0	1		1
159	AD	Guayo	1	1	0	0	0	1							0	0
160	AD	Guayo	4	4	0	0	0	1							0	0
161	AD	Guayo	9	7	2	2	0	0.777778			1	1			2	0		2
162	AD	Guayo	9	9	0	1	0	1							0	0
163	AD	Guayo	10	5	5	0	0	0.5			5				2	3		5
164	AD	Guayo	13	10	3	0	0	0.769231				3			2	1		3
165	AD	Guayo	5	4	1	0	0	0.8			1				1	0			1
166	AD	Guayo	11	7	4	0	0	0.636364				4			1	3			4
167	AD	Guayo	1	1	0	0	0	1							0	0
168	AD	Guayo	7	3	4	0	0	0.428571			3	1			2	2		4
169	AD	Guayo	10	7	3	0	0	0.7			1	2			2	1		2		1	Febrile Syndrome Unspecified (1)
170	AD	Guayo	4	4	0	0	0	1							0	0
171	AD	Guayo	6	3	3	1	0	0.5		1	1	1			1	2		2		1	Preterm Birth - IRDS (1)
178	AD	Guayo	5	5	0	0	0	1							0	0
179	AD	Guayo	5	5	0	0	0	1							0	0
180	AD	Guayo	4	3	1	0	0	0.75				1			1	0			1
181	AD	Guayo	10	5	5	3	0	0.5		1	2	2			4	1		1		4	Gastroenteritis (2) / Unknown (2)
182	AD	Guayo	9	5	4	0	1	0.555556		1	1	2			3	1		1		3	Febrile Syndrome Unspecified (1) / Gastroenteritis (1) / Unknown (1)
183	AD	Guayo	12	9	3	2	0	0.75			2	1			2	1			1	2	Gastroenteritis (2)
184	AD	Guayo	4	1	3	0	0	0.25		1		2			2	1		2		1	Febrile Syndrome Unspecified (1)
185	AD	Guayo	4	2	2	0	0	0.5			1	1			2	0		2
186	AD	Guayo	1	1	0	0	0	1							0	0
187	AD	Guayo	12	11	1	2	0	0.916667			1				1	0				1	Febrile Syndrome Unspecified (1)
188	AD	Guayo	8	6	2	0	1	0.75			1	1			1	1		2
189	AD	Guayo	4	3	1	0	0	0.75			1				1	0				1	Febrile Syndrome Unspecified (1)
190	AD	Guayo	6	2	4	0	0	0.333333			2	2			3	1		4
191	AD	Guayo	3	3	0	0	0	1							0	0
192	AD	Guayo	12	5	7	0	0	0.416667			2	4	1		5	2		4	3
193	AD	Guayo	5	2	3	0	0	0.4				3			0	3		2	1
194	AD	Guayo	6	3	3	0	0	0.5			2	1			2	1		1	2
195	AD	Guayo	10	6	4	0	0	0.6			2	2			2	2		4
196	AD	Guayo	12	7	5	1	0	0.583333				5			3	2		5
204	AD	Guayo	2	2	0	0	0	1							0	0
205	AD	Guayo	8	6	2	0	0	0.75				2			2	0		1	1
206	AD	Guayo	10	2	8	4	0	0.2			3	5			6	2		8
207	AD	Guayo	2	2	0	0	0	1							0	0
208	AD	Guayo	7	7	0	0	0	1							0	0
209	AD	Guayo	7	7	0	0	0	1							0	0
210	AD	Guayo	8	6	2	0	0	0.75			1	1			1	1			2
211	AD	Guayo	2	2	0	0	0	1							0	0
212	AD	Guayo	7	7	0	0	0	1							0	0
213	AD	Guayo	3	3	0	0	0	1							0	0
214	AD	Guayo	5	5	0	0	0	1							0	0
215	AD	Guayo	4	3	1	0	0	0.75				1			0	1			1
216	AD	Guayo	9	7	2	0	0	0.777778				2			2	0		2
217	AD	Guayo	10	5	5	0	0	0.5			5				2	3		5
226	AD	Guayo	5	4	1	0	0	0.8			1				1	0		1
227	AD	Guayo	2	2	0	0	0	1							0	0
228	AD	Guayo	2	1	1	0	0	0.5		1					0	1				1	Unknown (1)
229	AD	Guayo	5	3	2	0	0	0.6			1	1			2	0		1		1	Unknown (1)
230	AD	Guayo	6	6	0	0	0	1							0	0
231	AD	Guayo	2	2	0	0	0	1							0	0
232	AD	Guayo	2	2	0	0	0	1							0	0
233	AD	Guayo	1	1	0	0	0	1							0	0
234	AD	Guayo	9	3	6	0	0	0.333333				6			5	1		6
235	AD	Guayo	4	2	2	0	0	0.5				2			0	2		2
236	AD	Guayo	9	5	4	0	1	0.555556				4			3	1		4
237	AD	Guayo	1	0	1	0	0	0					1		1	0		1
238	AD	Guayo	3	2	1	0	0	0.666667			1				1	0		1
239	AD	Guayo	9	5	4	1	0	0.555556			2	2			4	0		4
240	AD	Guayo	10	3	7	0	0	0.3			5	2			3	4		7
241	AD	Guayo	3	2	1	0	0	0.666667			1				1	0		1
242	AD	Guayo	2	1	1	1	0	0.5			1				0	1		1
252	AD	Guayo	2	1	1	0	0	0.5			1				0	1		1
253	AD	Guayo	4	2	2	0	0	0.5				2			1	1		2
254	AD	Guayo	3	1	2	0	0	0.333333				2			2	0		2
255	AD	Guayo	7	5	2	0	0	0.714286				2			0	2		1		1	Gastroenteritis (1)
256	AD	Guayo	5	3	2	0	0	0.6				2			1	1		2
257	AD	Guayo	4	3	1	0	0	0.75				1			1	0		1
258	AD	Guayo	5	2	3	0	0	0.4				3			3	0		3
259	AD	Guayo	3	3	0	1	0	1							0	0
260	AD	Guayo	3	2	1	0	0	0.666667				1			1	0		1
261	AD	Guayo	4	3	1	0	0	0.75			1				1	0				1	Malnutrition (1)
262	AD	Guayo	2	1	1	1	1	0.5			1				1	0		1
263	AD	Guayo	5	3	2	0	0	0.6				2			0	2		1		1	Febrile Syndrome Unspecified (1)
264	AD	Guayo	4	2	2	0	0	0.5			1	1			1	1		2
265	AD	Guayo	6	5	1	0	0	0.833333				1			1	0		1
266	AD	Guayo	1	1	0	0	0	1							0	0
267	AD	Guayo	9	3	6	0	0	0.333333		1	1	4			6	0		3		3	Gastroenteritis (2) / Infanticide - Unknown (1)
268	AD	Guayo	1	1	0	0	0	1							0	0
269	AD	Guayo	9	7	2	0	0	0.777778			1	1			0	2		2
270	AD	Guayo	6	6	0	0	0	1							0	0
271	AD	Guayo	2	2	0	0	0	1							0	0
282	AD	Guayo	10	5	5	2	0	0.5				4	1		3	2		4	1
283	AD	Guayo	7	6	1	0	0	0.857143		1					1	0				1	Malnutrition (1)
284	AD	Guayo	7	6	1	0	0	0.857143		1					0	1				1	Birth Asphyxia - Meconium aspiration (Multiple Pregnancy - one of the twins) (1)
285	AD	Guayo	9	5	4	0	0	0.555556		1	3				2	2		3	1
286	AD	Guayo	9	4	5	0	0	0.444444			4	1			2	3		1	1	3	Febrile Syndrome Unspecified (1) / Gastroenteritis (2)
287	AD	Guayo	5	3	2	1	0	0.6			2				1	1			2
288	AD	Guayo	9	8	1	0	0	0.888889		1					0	1				1	Birth Asphyxia - Meconium aspiration (1)
289	AD	Guayo	1	1	0	0	0	1							0	0
290	AD	Guayo	4	3	1	0	0	0.75			1				1	0		1
291	AD	Guayo	1	1	0	0	0	1							0	0
292	AD	Guayo	4	3	1	0	0	0.75			1				0	1			1
304	AD	Guayo	1	1	0	2	0	1							0	0
305	AD	Guayo	1	0	1	0	0	0				1			1	0				1	Gastroenteritis (1)
306	AD	Guayo	3	2	1	0	0	0.666667		1					1	0				1	Infanticide - Unknown (1)
307	AD	Guayo	5	4	1	0	0	0.8				1			1	0		1
308	AD	Guayo	5	2	3	0	0	0.4				3			2	1		1		2	Gastroenteritis (2)
309	AD	Guayo	1	1	0	0	0	1							0	0
310	AD	Guayo	2	2	0	0	0	1							0	0
311	AD	Guayo	2	2	0	0	0	1							0	0
312	AD	Guayo	3	1	2	0	0	0.333333				2			1	1				2	Unknown (2)
313	AD	Guayo	2	1	1	0	0	0.5				1			1	0		1
314	AD	Guayo	6	4	2	2	0	0.666667			1	1			0	2		2
315	AD	Guayo	3	2	1	0	0	0.666667				1			1	0			1
316	AD	Guayo	4	3	1	0	0	0.75			1				1	0		1
317	AD	Guayo	1	1	0	1	0	1							0	0
318	AD	Guayo	10	8	2	2	0	0.8			1		1		1	1			1	1	Unknown (1)
319	AD	Guayo	10	9	1	0	0	0.9				1			1	0		1
320	AD	Guayo	14	5	9	1	0	0.357143			3	6			0	9		4	5
321	AD	Guayo	6	4	2	1	0	0.666667			2				0	2			2
322	AD	Guayo	5	5	0	0	0	1							0	0
323	AD	Guayo	4	4	0	0	0	1							0	0
324	AD	Guayo	11	2	9	1	0	0.181818		0	6	3	0		6	3		9
325	AD	Guayo	6	1	5	0	0	0.166667		4	1				2	3			1	4	Preterm Birth - IRDS (4)
326	AD	Guayo	1	0	1	0	0	0			1				0	1		1
327	AD	Guayo	7	5	2	0	0	0.714286			1	1			1	1		2
328	AD	Guayo	1	1	0	1	0	1							0	0
329	AD	Guayo	8	5	3	1	0	0.625			2	1			2	1		3
330	AD	Guayo	5	5	0	2	0	1							0	0
380	AD	Guayo	2	1	1	0	1	0.5				1			0	1		1
381	AD	Guayo	4	4	0	0	0	1							0	0
382	AD	Guayo	2	2	0	0	0	1							0	0
383	AD	Guayo	6	5	1	0	0	0.833333		1					1	0		1
384	AD	Guayo	12	3	9	0	0	0.25				9			3	6		8		1	Eruptive Disease (1)
385	AD	Guayo	3	1	2	0	0	0.333333			2				1	1		2
386	AD	Guayo	5	5	0	0	0	1							0	0
387	AD	Guayo	4	1	3	0	0	0.25			3				2	1				3	Witchcraft (3)
388	AD	Guayo	5	3	2	0	0	0.6			2				0	2		2
389	AD	Guayo	6	4	2	0	0	0.666667				2			1	1		2
390	AD	Guayo	5	3	2	0	0	0.6				2			2	0		2
391	AD	Guayo	4	3	1	0	1	0.75				1			1	0		1
392	AD	Guayo	6	5	1	0	0	0.833333				1			0	1		1
393	AD	Guayo	1	1	0	0	0	1							0	0
394	AD	Guayo	4	3	1	0	0	0.75				1			1	0		1
395	AD	Guayo	5	1	4	0	0	0.2		1	1	2			3	1		4
396	AD	Guayo	2	2	0	0	0	1							0	0
397	AD	Guayo	2	1	1	0	0	0.5				1			0	1		1
398	AD	Guayo	4	3	1	0	0	0.75				1			1	0		1
399	AD	Guayo	4	1	3	0	0	0.25			1	2			2	1		3
421	AD	Guayo	4	4	0	1	0	1							0	0
422	AD	Guayo	3	3	0	0	0	1							0	0
423	AD	Guayo	7	7	0	4	0	1							0	0
424	AD	Guayo	2	2	0	0	0	1							0	0
425	AD	Guayo	1	1	0	0	0	1							0	0
426	AD	Guayo	5	5	0	0	0	1							0	0
427	AD	Guayo	9	6	3	0	0	0.666667			2	1			2	1		2		1	Gastroenteritis (1)
428	AD	Guayo	11	8	3	0	0	0.727273		1		2			1	2		1	1	1	Unknown (1)
429	AD	Guayo	7	3	4	1	0	0.428571		2	1	1			2	2			2	2	Snake bite (1) / Unknown (1)
430	AD	Guayo	2	2	0	0	0	1							0	0
431	AD	Guayo	7	6	1	1	0	0.857143				1			1	0		1
432	AD	Guayo	6	6	0	0	0	1							0	0
433	AD	Guayo	5	5	0	0	0	1							0	0
434	AD	Guayo	1	1	0	0	0	1							0	0
435	AD	Guayo	1	1	0	0	0	1							0	0
436	AD	Guayo	1	1	0	0	0	1							0	0
437	AD	Guayo	3	3	0	0	0	1							0	0
438	AD	Guayo	4	4	0	0	0	1							0	0
439	AD	Guayo	4	4	0	0	0	1							0	0
440	AD	Guayo	3	2	1	0	0	0.666667				1			1	0				1	Drowning (1)
441	AD	Guayo	4	1	3	0	0	0.25		1		2			2	1		2		1	Upper GI bleeding (1)
442	AD	Guayo	11	6	5	1	0	0.545455			3	2			4	1		4		1	Gastroenteritis (1)
443	AD	Guayo	5	5	0	0	0	1							0	0
444	AD	Guayo	0	0	0	1	0	0							0	0
445	AD	Guayo	1	1	0	0	0	1							0	0
446	AD	Guayo	3	3	0	0	0	1							0	0
447	AD	Guayo	2	2	0	0	0	1							0	0
448	AD	Guayo	5	5	0	0	0	1							0	0
449	AD	Guayo	3	3	0	0	0	1							0	0
450	AD	Guayo	5	3	2	0	0	0.6		2					0	2				2	Unknown (2)
451	AD	Guayo	3	3	0	0	0	1							0	0
452	AD	Guayo	1	1	0	0	0	1							0	0
453	AD	Guayo	3	3	0	1	0	1							0	0
454	AD	Guayo	10	10	0	0	0	1							0	0
455	AD	Guayo	2	1	1	0	0	0.5				1			1	0		1
456	AD	Guayo	9	4	5	0	0	0.444444		1		4			3	2		5
457	AD	Guayo	1	1	0	0	0	1							0	0
458	AD	Guayo	4	3	1	0	0	0.75				1			0	1		1
459	AD	Guayo	5	5	0	0	0	1							0	0
460	AD	Guayo	12	6	6	0	0	0.5		1	3	2			2	4		4		2	Drowning (2)
461	AD	Guayo	6	6	0	0	0	1							0	0
462	AD	Guayo	3	3	0	0	0	1							0	0
463	AD	Guayo	2	2	0	1	0	1							0	0
464	AD	Guayo	2	2	0	0	0	1							0	0
465	AD	Guayo	12	5	6	0	0	0.416667		3	2	1			4	2		1	1	4	Malnutrition (1) / Pertussis suspected -IRA (1) / Preterm-Birth (2) / CNS Infection (1)
466	AD	Guayo	2	2	0	0	0	1							0	0
467	AD	Guayo	8	8	0	0	0	1							0	0
468	AD	Guayo	3	3	0	1	0	1							0	0
469	AD	Guayo	3	3	0	0	0	1							0	0
470	AD	Guayo	3	3	0	0	0	1							0	0
471	AD	Guayo	8	5	3	0	0	0.625		3					1	2				3	Preterm-Birth (2) / Bacterial sepsis of newborn unspecified (1)
472	AD	Guayo	2	2	0	0	0	1							0	0
473	AD	Guayo	7	3	4	4	0	0.428571				3	1		2	2		4
474	AD	Guayo	3	1	2	0	0	0.333333		1		1			1	1		1		1	Gastroenteritis (1)
475	AD	Guayo	8	3	5	0	0	0.375			1	4			0	5		5
476	AD	Guayo	4	4	0	0	0	1							0	0
477	AD	Guayo	2	2	0	0	0	1							0	0
478	AD	Guayo	5	5	0	0	0	1							0	0
479	AD	Guayo	5	5	0	0	0	1							0	0
480	AD	Guayo	11	8	3	0	0	0.727273			1	2			1	2		2		1	Pertussis (1)
481	AD	Guayo	1	1	0	1	0	1							0	0
482	AD	Guayo	3	3	0	2	0	1							0	0
483	AD	Guayo	3	3	0	0	0	1							0	0
484	AD	Guayo	1	0	1	1	0	0				1			0	1		1
485	AD	Guayo	1	1	0	1	0	1							0	0
486	AD	Guayo	12	2	10	0	0	0.166667			2	6	2		2	8		6	4
487	AD	Guayo	12	10	2	1	0	0.833333			2				1	1				2	Measles (1) / Unknown (1)
488	AD	Guayo	2	2	0	0	0	1							0	0
489	AD	Guayo	9	9	0	0	0	1							0	0
490	AD	Guayo	9	9	0	0	0	1							0	0
491	AD	Guayo	2	2	0	0	0	1							0	0
492	AD	Guayo	6	4	2	0	0	0.666667			2				0	2			2
493	AD	Guayo	5	4	1	0	0	0.8				1			1	0		1
494	AD	Guayo	8	6	2	0	0	0.75				2			1	1		2
495	AD	Guayo	1	1	0	0	0	1							0	0
496	AD	Guayo	1	1	0	0	0	1							0	0
497	AD	Guayo	6	4	2	6	0	0.666667		2					2	0			2
498	AD	Guayo	4	3	1	0	0	0.75				1			1	0		1
499	AD	Guayo	5	5	0	4	0	1							0	0
3	AD	Curiapo	4	3	1	0	0	0.75		1					1	0				1	Preterm-Birth - IRDS (1)
5	AD	Curiapo	4	2	2	0	1	0.5				2			1	1				2	Gastroenteritis (2)
10	AD	Curiapo	2	2	0	0	0	1							0	0
26	AD	Curiapo	4	2	2	0	0	0.5			1	1			1	1		2
27	AD	Curiapo	10	5	5	0	0	0.5			2	2	1		1	4				5	Measles (5)
28	AD	Curiapo	3	3	0	0	0	1							0	0
32	AD	Curiapo	7	6	1	0	0	0.857143			1				1	0				1	Unknown (1)
33	AD	Curiapo	11	8	3	0	0	0.727273			2	1			2	1		1		2	Measles (2)
34	AD	Curiapo	3	3	0	0	0	1							0	0
38	AD	Curiapo	4	3	1	0	0	0.75			1				1	0			1
39	AD	Curiapo	11	8	3	0	0	0.727273			1	2			2	1			2	1	Gastroenteritis (1)
40	AD	Curiapo	2	2	0	0	0	1							0	0
53	AD	Curiapo	1	0	1	0	0	0			1				0	1		1
54	AD	Curiapo	2	2	0	0	0	1							0	0
55	AD	Curiapo	4	3	1	0	0	0.75			1				0	1		1
63	AD	Curiapo	8	8	0	0	0	1							0	0
64	AD	Curiapo	5	1	4	0	0	0.2				4			3	1		4
65	AD	Curiapo	9	5	4	1	0	0.555556			3	1			4	0		4
66	AD	Curiapo	2	2	0	0	0	1							0	0
99	AD	Curiapo	7	7	0	0	0	1							0	0
100	AD	Curiapo	6	5	1	2	0	0.833333				1			1	0		1
101	AD	Curiapo	1	1	0	0	0	1							0	0
102	AD	Curiapo	2	2	0	0	0	1							0	0
103	AD	Curiapo	8	5	3	0	0	0.625			2	1			1	2		3
134	AD	Curiapo	5	4	1	0	0	0.8			1				0	1		1
135	AD	Curiapo	2	2	0	0	0	1							0	0
136	AD	Curiapo	4	4	0	0	0	1							0	0
137	AD	Curiapo	8	8	0	0	0	1							0	0
138	AD	Curiapo	5	1	4	0	0	0.2			4				3	1		4
172	AD	Curiapo	5	4	1	0	0	0.8		1					0	1			1
173	AD	Curiapo	5	3	2	0	0	0.6			1	1			2	0		2
174	AD	Curiapo	5	4	1	0	0	0.8			1				1	0		1
175	AD	Curiapo	5	4	1	0	0	0.8				1			0	1		1
176	AD	Curiapo	11	7	4	1	0	0.636364			2	2			0	4			4
177	AD	Curiapo	5	4	1	0	0	0.8			1				1	0		1
218	AD	Curiapo	1	0	1	0	0	0			1				0	1				1	Gastroenteritis (1)
219	AD	Curiapo	4	2	2	0	0	0.5				1	1		0	2				2	Gastroenteritis (2)
220	AD	Curiapo	5	3	2	0	0	0.6				2			1	1		2
221	AD	Curiapo	10	7	3	0	0	0.7				3			2	1		3
222	AD	Curiapo	6	4	2	0	0	0.666667			2				1	1				2	Gastroenteritis (2)
223	AD	Curiapo	12	10	2	0	0	0.833333				2			1	1				2	Gastroenteritis (2)
224	AD	Curiapo	4	4	0	0	0	1							0	0
225	AD	Curiapo	5	4	1	0	0	0.8				1			1	0		1
293	AD	Curiapo	9	9	0	0	0	1							0	0
294	AD	Curiapo	3	3	0	0	0	1							0	0
295	AD	Curiapo	13	8	5	1	0	0.615385				5			3	2		1	1	3	Eruptive Disease (2) / Gastroenteritis (1)
296	AD	Curiapo	3	3	0	0	0	1							0	0
297	AD	Curiapo	3	3	0	0	0	1							0	0
298	AD	Curiapo	2	2	0	0	0	1							0	0
299	AD	Curiapo	5	3	2	0	0	0.6			2				1	1				2	Febrile Syndrome Unspecified (2)
300	AD	Curiapo	5	4	1	0	0	0.8				1			0	1		1
301	AD	Curiapo	3	3	0	0	0	1							0	0
302	AD	Curiapo	5	4	1	0	0	0.8				1			1	0		1
303	AD	Curiapo	8	7	1	2	0	0.875			1				1	0			1
362	AD	Curiapo	4	4	0	0	0	1							0	0
363	AD	Curiapo	6	5	1	1	0	0.833333				1			0	1		1
364	AD	Curiapo	12	11	1	0	0	0.916667				1			1	0		1
365	AD	Curiapo	5	4	1	0	0	0.8			1				1	0				1	Malnutrition (1)
366	AD	Curiapo	5	4	1	1	0	0.8			1				1	0				1	Unknown (1)
367	AD	Curiapo	7	3	4	0	0	0.428571			2		2		2	2		2		2	Malnutrition (Twins) (2)
368	AD	Curiapo	7	7	0	0	0	1							0	0
369	AD	Curiapo	5	5	0	0	0	1							0	0
370	AD	Curiapo	6	6	0	1	0	1							0	0
371	AD	Curiapo	8	7	1	0	0	0.875			1				1	0		1
372	AD	Curiapo	10	6	4	1	0	0.6			1	2	1		1	3			2	2	Trauma (1) / CNS Infection (1)
373	AD	Curiapo	6	4	2	0	0	0.666667			2				1	1		2
374	AD	Curiapo	6	6	0	0	0	1							0	0
375	AD	Curiapo	12	11	1	0	0	0.916667			1				1	0		1
376	AD	Curiapo	5	4	1	1	0	0.8			1				0	1				1	Asthma (1)
377	AD	Curiapo	9	3	6	0	0	0.333333			4	2			3	3		4	1	1	Unspecified Malaria (1)
378	AD	Curiapo	5	3	2	0	0	0.6				2			2	0		2
379	AD	Curiapo	10	4	6	0	0	0.4			5	1			4	2		4	2
400	AD	Curiapo	6	4	2	0	0	0.666667				2			1	1		2
401	AD	Curiapo	6	3	3	2	0	0.5			3				2	1				3	Gastroenteritis (3)
402	AD	Curiapo	5	1	4	0	0	0.2			2	2			2	2		1		3	Gastroenteritis (1) / CNS Infection - Febrile Syndrome Unspecified (2)
403	AD	Curiapo	10	7	3	0	0	0.7		1	2				2	1		1		2	Drowning (1) / Unknown (1)
404	AD	Curiapo	2	2	0	0	0	1							0	0
405	AD	Curiapo	6	5	1	0	1	0.833333		1					1	0		1
406	AD	Curiapo	4	4	0	0	0	1							0	0
407	AD	Curiapo	6	5	1	0	1	0.833333			1				0	1		1
408	AD	Curiapo	11	5	6	0	0	0.454545			4	2			4	2		1		5	Gastroenteritis (5)
409	AD	Curiapo	3	3	0	0	0	1							0	0
410	AD	Curiapo	1	1	0	0	0	1							0	0
411	AD	Curiapo	7	3	4	0	0	0.428571			1	2	1		2	2		1		3	Gastroenteritis (2) / Malnutrition (1)
412	AD	Curiapo	6	4	2	0	0	0.666667			1	1			1	1		2
413	AD	Curiapo	3	2	1	0	0	0.666667		1					0	1				1	Preterm-Birth (1)
414	AD	Curiapo	2	0	2	0	0	0				1	1		0	2		2
415	AD	Curiapo	5	3	2	0	0	0.6			2				2	0			2
416	AD	Curiapo	4	4	0	0	0	1							0	0
417	AD	Curiapo	10	5	5	0	0	0.5				5			2	3		5
418	AD	Curiapo	1	1	0	0	0	1							0	0
419	AD	Curiapo	11	5	6	0	0	0.454545		1	3	2			4	2		5		1	Unknown (1)
420	AD	Curiapo	7	3	4	0	1	0.428571			3	1			2	2		1		3	Scorpion Sting (1) / Gastroenteritis (2)
4	AD	Nabasanuka	3	3	0	1	0	1							0	0
11	AD	Nabasanuka	12	5	7	0	0	0.416667			2	5			4	3		7
12	AD	Nabasanuka	12	9	3	0	0	0.75			2	1			2	1		3
59	AD	Nabasanuka	4	3	1	1	0	0.75			1				0	1			1
60	AD	Nabasanuka	1	1	0	0	0	1							0	0
61	AD	Nabasanuka	1	1	0	0	0	1							0	0
62	AD	Nabasanuka	12	8	4	0	0	0.666667			2	2			2	2		2	1	1	Pertussis (1)
67	AD	Nabasanuka	2	2	0	0	0	1							0	0
68	AD	Nabasanuka	1	1	0	0	0	1							0	0
69	AD	Nabasanuka	2	2	0	0	0	1							0	0
70	AD	Nabasanuka	10	8	2	0	0	0.8			1	1			2	0		1		1	Unknown (1)
149	AD	Nabasanuka	5	5	0	0	0	1							0	0
150	AD	Nabasanuka	12	8	4	0	0	0.666667			4				1	3		1	3
151	AD	Nabasanuka	15	5	10	2	0	0.333333			5	5			6	4		2	8
152	AD	Nabasanuka	11	5	6	0	0	0.454545				6			3	3				6	witchcraft (6)
153	AD	Nabasanuka	10	3	7	0	0	0.3				7			1	6		7
197	AD	Nabasanuka	9	7	2	0	0	0.777778			2				1	1		1	1		Pertussis suspected
198	AD	Nabasanuka	10	9	1	2	0	0.9			1				1	0			1
199	AD	Nabasanuka	4	4	0	0	0	1							0	0
200	AD	Nabasanuka	8	5	3	0	0	0.625			3				3	0		3
201	AD	Nabasanuka	10	9	1	0	0	0.9			1				0	1			1
202	AD	Nabasanuka	3	3	0	0	0	1							0	0
203	AD	Nabasanuka	3	1	2	0	1	0.333333				2			1	1		2
243	AD	Nabasanuka	4	2	2	0	0	0.5			1	1			1	1		2
244	AD	Nabasanuka	14	11	3	0	0	0.785714			1	2			2	1		3
245	AD	Nabasanuka	6	6	0	1	0	1							0	0
246	AD	Nabasanuka	10	6	4	0	0	0.6			3	1			1	3		4
247	AD	Nabasanuka	12	9	3	0	0	0.75		2	1				1	2		1		2	Unknown (2)
248	AD	Nabasanuka	11	8	3	0	0	0.727273		1	2				2	1		1		2	Unknown (2)
249	AD	Nabasanuka	6	5	1	0	0	0.833333				1			0	1			1
250	AD	Nabasanuka	1	1	0	0	0	1							0	0
251	AD	Nabasanuka	1	1	0	0	0	1							0	0
272	AD	Nabasanuka	1	0	1	0	0	0		1					1	0				1	Preterm-Birth - IRDS (1)
273	AD	Nabasanuka	13	8	5	2	0	0.615385		2	3				4	1				5	Impetigo (2) / Pertussis (1) / Preterm-Birth (1) / Malnutrition (1)
274	AD	Nabasanuka	7	5	2	1	0	0.714286			2				0	2				2	witchcraft (2)
275	AD	Nabasanuka	1	1	0	0	0	1							0	0
276	AD	Nabasanuka	5	3	2	1	0	0.6			2				2	0				2	Spider bite (1) / Ascariasis - Intestinal Obstruction (1)
277	AD	Nabasanuka	4	3	1	0	0	0.75		1					0	1				1	Birth Asphyxia (1)
278	AD	Nabasanuka	3	3	0	0	0	1							0	0
279	AD	Nabasanuka	4	3	1	0	0	0.75			1				1	0		1
280	AD	Nabasanuka	7	6	1	0	0	0.857143				1			0	1		1
281	AD	Nabasanuka	9	8	1	1	0	0.888889				1			1	0				1	Congenital Abnormality (1)
331	AD	Nabasanuka	10	9	1	0	0	0.9			1				0	1		1
332	AD	Nabasanuka	4	4	0	0	0	1							0	0
333	AD	Nabasanuka	6	3	3	0	0	0.5				3			1	2			3
334	AD	Nabasanuka	4	2	2	0	0	0.5				2			2	0		2
335	AD	Nabasanuka	3	3	0	0	0	1							0	0
336	AD	Nabasanuka	3	3	0	0	0	1							0	0
337	AD	Nabasanuka	11	8	3	2	0	0.727273			1	2			1	2		1		2	measles (1) / malnutrition (1)
338	AD	Nabasanuka	6	4	2	0	0	0.666667			1	1			1	1		1		1	Impetigo (1)
339	AD	Nabasanuka	3	3	0	0	0	1							0	0
340	AD	Nabasanuka	1	1	0	0	0	1							0	0
341	AD	Nabasanuka	9	8	1	1	0	0.888889			1				0	1		1
342	AD	Nabasanuka	6	4	2	0	0	0.666667			1	1			1	1		1	1
343	AD	Nabasanuka	2	2	0	0	0	1							0	0
344	AD	Nabasanuka	4	3	1	0	0	0.75				1			0	1		1
345	AD	Nabasanuka	1	1	0	0	0	1							0	0
346	AD	Nabasanuka	4	3	1	0	0	0.75				1			0	1			1
347	AD	Nabasanuka	1	1	0	0	0	1							0	0
348	AD	Nabasanuka	8	8	0	0	0	1							0	0
349	AD	Nabasanuka	3	3	0	2	0	1							0	0
350	AD	Nabasanuka	4	4	0	0	0	1							0	0
351	AD	Nabasanuka	6	6	0	0	0	1							0	0
352	AD	Nabasanuka	11	8	3	0	0	0.727273			3				2	1		3
353	AD	Nabasanuka	8	5	3	0	0	0.625			2	1			2	1		3
354	AD	Nabasanuka	5	5	0	0	0	1							0	0
355	AD	Nabasanuka	3	3	0	0	0	1							0	0
356	AD	Nabasanuka	7	5	2	0	0	0.714286		2					2	0				2	Unknown (2)
357	AD	Nabasanuka	7	7	0	1	0	1							0	0
358	AD	Nabasanuka	14	7	7	0	0	0.5			5	2			4	3		7
359	AD	Nabasanuka	7	7	0	0	0	1							0	0
360	AD	Nabasanuka	8	6	2	0	0	0.75			1	1			1	1		2
361	AD	Nabasanuka	2	2	0	0	0	1							0	0
			3937	2692	1245	196	28	509.849		108	560	543	34		701	544		733	227	285
										1245								1245

## Sheet: Cause of Deaths_Tables
	Causes of Death. Entire Sample	Frequency	Percentage (%)		Causes of Death. Neonatal Period	Frequency	Percentage (%)		Causes of Death. 1-5 years	Frequency	Percentage (%)
	Gastroenteritis / Diarrea (A09)	783	62.8916		Preterm Birth (P07) - IRDS (P28.5)	30	27.7778		Gastroenteritis - Diarrhea (A09)	390	71.8232
	Respiratory Tract Infection / Pneumonia (J00-J39)	227	18.2329		Unknown	22	20.3704		Respiratory Tract Infection - Pneumonia (J00-J39)	86	15.8379
	Unknown	48	3.85542		Gastroenteritis - Diarrhea (A09)	16	14.8148		Febrile Syndrome Unspecified (R50)	14	2.57827
	Febrile Syndrome Unspecified (R50)	38	3.05221		Respiratory Tract Infection - Pneumonia (J00-J39)	13	12.037		Unknown	13	2.39411
	Preterm-Birth (P07) / IRDS (P28.5)	29	2.32932		Birth Asphyxia-Meconium Aspiration (P20-P29)	13	12.037		"Witchcraft"	8	1.4733
	Malnutrition (E40-E64)	18	1.44578		Infanticide	2	1.85185		Malnutrition (E40-E64)	6	1.10497
	"Witchcraft"	17	1.36546		Congenital Abnormalities (Q00-Q99)	2	1.85185		Drowning (W69-W70, V90, V92)	5	0.92081
	Birth Asphyxia / Meconium Aspiration (P20-P29)	13	1.04418		Birth Trauma (P10-P15)	2	1.85185		Measles (B05)	4	0.736648
	Drowning (W69-W70, V90, V92)	10	0.803213		Malnutrition (E40-E64)	2	1.85185		Pertussis (A37)	3	0.552486
	Measles (B05)	9	0.722892		CNS Infection (G00-G09)	1	0.925926		Eruptive Diseases (B03-B09)	3	0.552486
	Pertussis (A37)	7	0.562249		Drowning (W69-W70, V90, V92)	1	0.925926		CNS Infection (G00-G09)	2	0.368324
	Impetigo (L00-L08)	6	0.481928		Pertussis (A37)	1	0.925926		Impetigo (L00-L08)	1	0.184162
	CNS Infection (G00-G09)	6	0.481928		Upper GI Bleeding (K92.2)	1	0.925926		Congenital Abnormalities (Q00-Q99)	1	0.184162
	Congenital Abnormalities (Q00-Q99)	3	0.240964		Bacterial Sepsis of Newborn Unspecified (P36.9)	1	0.925926		Cholera (A00X)	1	0.184162
	Accident. Trauma (S00-S99)	3	0.240964		Febrile Syndrome Unspecified (R50)	1	0.925926		Mumps (B26)	1	0.184162
	Eruptive Diseases (B03-B09)	3	0.240964						Toxic effect of unspecified substances (T65)	1	0.184162
	Infanticide	3	0.240964		Infectious Diseases	32	29.6296		Unspecified Malaria	1	0.184162
	Birth- Trauma (P10-P15)	2	0.160643		Non-communicable causes	54	50		Scorpion Sting (T63.2)	1	0.184162
	Cholera (A00X)	2	0.160643		Unknown	22	20.3704		Ascariasis. Intestinal Obstruction (B77, K56.6)	1	0.184162
	Ascariasis. Intestinal Obstruction (B77, K56.6)	2	0.160643						Chickenpox (Varicella) (B01)	1	0.184162
	Tuberculosis (A15-A19)	1	0.0803213		TOTAL	108
	AIDS (B20-B24)	1	0.0803213						Infectious Diseases	493	90.7919
	Obstetrical Maternal Death (060-075)	1	0.0803213		Causes of Death. 1-11 months	Frequency	Percentage (%)		Non-communicable causes	29	5.3407
	Mumps (B26)	1	0.0803213		Gastroenteritis - Diarrhea (A09)	360	64.2857		Unknown	21	3.8674
	Toxic effect of unspecified substances (T65)	1	0.0803213		Respiratory Tract Infection - Pneumonia (J00-J39)	124	22.1429
	Chickenpox (Varicella) (B01)	1	0.0803213		Febrile Syndrome Unspecified (R50)	22	3.92857		TOTAL	543
	Electrocution (W85-W99)	1	0.0803213		Unknown	11	1.96429
	Dengue Fever (A90-A91)	1	0.0803213		Malnutrition (E40-E64)	9	1.60714		Causes of Death. 6-12 years	Frequency	Percentage (%)
	Edema (R60)	1	0.0803213		"Witchcraft"	8	1.42857		Gastroenteritis - Diarrhea (A09)	17	50
	Spider Bite (T63.3)	1	0.0803213		Impetigo (L00-L08)	5	0.892857		Respiratory Tract Infection - Pneumonia (J00-J39)	4	11.7647
	Scorpion Sting (T63.2)	1	0.0803213		Measles (B05)	4	0.714286		Unknown	2	5.88235
	Snake bite (T63.0)	1	0.0803213		Drowning (W69-W70, V90, V92)	3	0.535714		Accident. Trauma (S00-S99)	2	5.88235
	Upper GI bleeding (K92.2)	1	0.0803213		CNS Infection (G00-G09)	3	0.535714		Measles (B05)	1	2.94118
	Bacterial sepsis of newborn unspecified (P36.9)	1	0.0803213		Pertussis (A37)	2	0.357143		Obstetrical Maternal Death (060-075)	1	2.94118
	Unspecified Malaria (B54)	1	0.0803213		Infanticide	1	0.178571		Febrile Syndrome Unspecified (R50)	1	2.94118
	Asthma (J45-J46)	1	0.0803213		Ascariasis. Intestinal Obstruction (B77, K56.6)	1	0.178571		Tuberculosis (A15-A19)	1	2.94118
					Spider Bite (T63.3)	1	0.178571		AIDS (B20-B24)	1	2.94118
	Infectious Diseases	1052	84.498		Asthma (J45-J46)	1	0.178571		Malnutrition (E40-E64)	1	2.94118
	Non-communicable causes	128	10.2811		Accident. Trauma (S00-S99)	1	0.178571		Drowning (W69-W70, V90, V92)	1	2.94118
	Unknown	65	5.22088		Edema (R60)	1	0.178571		"Witchcraft"	1	2.94118
					Cholera (A00X)	1	0.178571		Electrocution (W85-W99)	1	2.94118
	TOTAL	1245	100		Dengue Fever (A90-A91)	1	0.178571
					Snake bite (T63.0)	1	0.178571		Infectious Diseases	24	70.5882
									Non-communicable causes	7	20.5882
					Infectious Diseases	496	88.5714		Unknown	3	8.82353
					Non-communicable causes	45	8.03571
					Unknown	19	3.39286		TOTAL	34
					TOTAL	560

## Sheet: Cause of deaths
Mother's ID	Municipality	Community	Subregion	Diarrhea	Gastroenteritis	Pneumonia. RTI	Unknown	Febrile Syndrome Unspecified	Preterm Birth / IRDS	Malnutrition	Witchcraft	Birth asphyxia / Meconium Aspiration	Drowning	Measles	Pertussis	Impetigo	CNS Infection	Congenital Abnormalities	Trauma	Eruptive Diseases	Infanticide	Birth- Trauma	Cholera	Ascariasis. Intestinal Obstruction	Tuberculosis	AIDS	Obstetrical Maternal Death	Mumps	Toxic effect of unspecified substances	Chickenpox (Varicella)	Electrocution	Dengue Fever	Edema	Spider Bite	Scorpion Sting	Snake bite	Upper GI bleeding	Bacterial sepsis of newborn unspecified	Unspecified Malaria	Asthma
1	PED	Isla del Muerto	PED-Manamo
4	PED	Winamorena I	PED-Manamo	8		2																	2
5	PED	Winamorena I	PED-Manamo	1			1
6	PED	Winamorena I	PED-Manamo	1			1
11	PED	Isla de Conoto	PED-Manamo
12	PED	Isla de Conoto	PED-Manamo	5
13	PED	Isla de Conoto	PED-Manamo
14	PED	Isla de Conoto	PED-Manamo	2
27	PED	Kajirina	PED-Manamo					9
28	PED	Morocoto	PED-Manamo			1
29	PED	Morocoto	PED-Manamo
30	PED	Morocoto	PED-Manamo	5		1
31	PED	Morocoto	PED-Manamo			1			4			1
32	PED	Morocoto	PED-Manamo						1
33	PED	Morocoto	PED-Manamo	5																							1
34	PED	Morocoto	PED-Manamo							1		1
35	PED	Morocoto	PED-Manamo			1
36	PED	Morocoto	PED-Manamo			1
37	PED	Morocoto	PED-Manamo
38	PED	Morocoto	PED-Manamo	1
39	PED	Wakajara de Manamo	PED-Manamo	1
40	PED	Wakajara de Manamo	PED-Manamo	2		1		1	1																								1
41	PED	Wakajara de Manamo	PED-Manamo
42	PED	Wakajara de Manamo	PED-Manamo
43	PED	Wakajara de Manamo	PED-Manamo	2
44	PED	Wakajara de Manamo	PED-Manamo	3		1
45	PED	Wakajara de Manamo	PED-Manamo	2
46	PED	Wakajara de Manamo	PED-Manamo				1
47	PED	Wakajara de Manamo	PED-Manamo				2
48	PED	Wakajara de Manamo	PED-Manamo	1
49	PED	Wakajara de Manamo	PED-Manamo	1
62	PED	Winamorena II	PED-Manamo						2
63	PED	Winamorena II	PED-Manamo
64	PED	Winamorena II	PED-Manamo	2																											1
65	PED	Winamorena II	PED-Manamo	2
66	PED	Winamorena II	PED-Manamo
67	PED	Winamorena II	PED-Manamo
68	PED	Winamorena II	PED-Manamo	1		2
69	PED	Winamorena II	PED-Manamo	1		2																										1
70	PED	Winamorena II	PED-Manamo	2		4
71	PED	Winamorena II	PED-Manamo	2		1
72	PED	Winamorena II	PED-Manamo			1
73	PED	Winamorena II	PED-Manamo
74	PED	Winamorena II	PED-Manamo	3
75	PED	Winamorena II	PED-Manamo	3
76	PED	Barrio Chino	PED-Manamo	3
77	PED	Barrio Chino	PED-Manamo			1		1
78	PED	Barrio Chino	PED-Manamo
79	PED	Barrio Chino	PED-Manamo																									1
80	PED	Barrio Chino	PED-Manamo	2
81	PED	Barrio Chino	PED-Manamo
82	PED	Barrio Chino	PED-Manamo	1
83	PED	Barrio Chino	PED-Manamo
84	PED	Barrio Chino	PED-Manamo	3		2	1
85	PED	Barrio Chino	PED-Manamo	1
86	PED	Barrio Chino	PED-Manamo	4
87	PED	Barrio Chino	PED-Manamo				1
88	PED	Barrio Chino	PED-Manamo					1
89	PED	Barrio Chino	PED-Manamo
90	PED	Barrio Chino	PED-Manamo
91	PED	La Culebrita	PED-Manamo	2
92	PED	La Culebrita	PED-Manamo
93	PED	La Culebrita	PED-Manamo	1		1
94	PED	La Culebrita	PED-Manamo
95	PED	Isla Misteriosa	PED-Manamo
96	PED	Isla Misteriosa	PED-Manamo			4
97	PED	Isla Misteriosa	PED-Manamo
98	PED	Isla Misteriosa	PED-Manamo	1
2	PED	Najakaina	PED-Waranoko
3	PED	Najakaina	PED-Waranoko	2
7	PED	Jagüey de los Cocos	PED-Waranoko
8	PED	Jagüey de los Cocos	PED-Waranoko			5
9	PED	Jagüey de los Cocos	PED-Waranoko
10	PED	Jagüey de los Cocos	PED-Waranoko			2
15	PED	Simoina	PED-Waranoko			3
16	PED	Simoina	PED-Waranoko
17	PED	Simoina	PED-Waranoko	2		1	1
18	PED	Simoina	PED-Waranoko	1
19	PED	Simoina	PED-Waranoko
20	PED	Kajirina	PED-Waranoko	3		1
21	PED	Kajirina	PED-Waranoko	2		2
22	PED	Kajirina	PED-Waranoko			5					1
23	PED	Kajirina	PED-Waranoko			1
24	PED	Kajirina	PED-Waranoko					5
25	PED	Kajirina	PED-Waranoko	4		2
26	PED	Kajirina	PED-Waranoko		2			2
50	PED	Waranoko II	PED-Waranoko	2		1	1
51	PED	Waranoko II	PED-Waranoko	2	1	1
52	PED	Waranoko II	PED-Waranoko	6		4
53	PED	Waranoko II	PED-Waranoko			1
54	PED	Waranoko II	PED-Waranoko			5										1
55	PED	Waranoko II	PED-Waranoko	2		1				1	1
56	PED	Waranoko II	PED-Waranoko			2
57	PED	Waranoko II	PED-Waranoko
58	PED	Waranoko II	PED-Waranoko				1
59	PED	Waranoko II	PED-Waranoko
60	PED	Waranoko II	PED-Waranoko	1
61	PED	Waranoko II	PED-Waranoko	1		1
1	TUC	Cojina II	Makareo-Mariusa	1									1				1
2	TUC	Nabasanuka de Makareo	Makareo-Mariusa			3
4	TUC	Isla de Tucupita	Makareo-Mariusa	2					1							1
5	TUC	Isla de Tucupita	Makareo-Mariusa	2		3				1
13	TUC	La Lagunita de Mariusa	Makareo-Mariusa				1
14	TUC	La Lagunita de Mariusa	Makareo-Mariusa	3		4
15	TUC	La Lagunita de Mariusa	Makareo-Mariusa	6
16	TUC	La Lagunita de Mariusa	Makareo-Mariusa	4
17	TUC	La Lagunita de Mariusa	Makareo-Mariusa			1
18	TUC	La Lagunita de Mariusa	Makareo-Mariusa			1
19	TUC	La Lagunita de Mariusa	Makareo-Mariusa
20	TUC	La Lagunita de Mariusa	Makareo-Mariusa
21	TUC	La Lagunita de Mariusa	Makareo-Mariusa	2
31	TUC	Punta Pescador	Makareo-Mariusa
32	TUC	Punta Pescador	Makareo-Mariusa
33	TUC	Punta Pescador	Makareo-Mariusa	2
34	TUC	Punta Pescador	Makareo-Mariusa
35	TUC	Punta Pescador	Makareo-Mariusa						1	1
36	TUC	Punta Pescador	Makareo-Mariusa	1
37	TUC	Punta Pescador	Makareo-Mariusa	1		3
38	TUC	Punta Pescador	Makareo-Mariusa			4
39	TUC	Punta Pescador	Makareo-Mariusa			1
40	TUC	Punta Pescador	Makareo-Mariusa			1												1	1
41	TUC	Punta Pescador	Makareo-Mariusa	10
42	TUC	Punta Pescador	Makareo-Mariusa	1
43	TUC	Punta Pescador	Makareo-Mariusa
44	TUC	Punta Pescador	Makareo-Mariusa					1
67	TUC	Mariusa	Makareo-Mariusa
68	TUC	Mariusa	Makareo-Mariusa	2
69	TUC	Mariusa	Makareo-Mariusa	5		3
70	TUC	Mariusa	Makareo-Mariusa
71	TUC	Mariusa	Makareo-Mariusa	7
72	TUC	Mariusa	Makareo-Mariusa	3		1						1
73	TUC	Mariusa	Makareo-Mariusa	1		3		3
74	TUC	Mariusa	Makareo-Mariusa	2		2
75	TUC	Mariusa	Makareo-Mariusa	3		1
76	TUC	Mariusa	Makareo-Mariusa	9				1
77	TUC	Mariusa	Makareo-Mariusa
78	TUC	Mariusa	Makareo-Mariusa	1		1
79	TUC	Mariusa	Makareo-Mariusa	1		1
80	TUC	Mariusa	Makareo-Mariusa	8		3
81	TUC	Mariusa	Makareo-Mariusa	6
82	TUC	Mariusa	Makareo-Mariusa
83	TUC	Mariusa	Makareo-Mariusa	15
84	TUC	Mariusa	Makareo-Mariusa				1
85	TUC	Mariusa	Makareo-Mariusa
86	TUC	Mariusa	Makareo-Mariusa	4		2
87	TUC	Mariusa	Makareo-Mariusa	7		3
88	TUC	Mariusa	Makareo-Mariusa
89	TUC	Mariusa	Makareo-Mariusa
90	TUC	Mariusa	Makareo-Mariusa
91	TUC	Mariusa	Makareo-Mariusa
6	TUC	Yacariyene	Alto Delta								1
7	TUC	Yacariyene	Alto Delta	1
8	TUC	Yacariyene	Alto Delta	1		1
9	TUC	Yacariyene	Alto Delta
10	TUC	Yacariyene	Alto Delta								2
11	TUC	Yacariyene	Alto Delta
12	TUC	Yacariyene	Alto Delta
22	TUC	Janokosebe	Alto Delta	1			1
23	TUC	Janokosebe	Alto Delta
24	TUC	Janokosebe	Alto Delta	1					1
25	TUC	Janokosebe	Alto Delta	1
26	TUC	Janokosebe	Alto Delta	2		1
27	TUC	Janokosebe	Alto Delta
28	TUC	Janokosebe	Alto Delta					2
29	TUC	Janokosebe	Alto Delta			1
30	TUC	Janokosebe	Alto Delta	1			1
45	TUC	Volcán	Alto Delta	1
46	TUC	Volcán	Alto Delta
47	TUC	Volcán	Alto Delta
48	TUC	Volcán	Alto Delta	4																					1
49	TUC	Volcán	Alto Delta	3
50	TUC	Volcán	Alto Delta	1
51	TUC	Volcán	Alto Delta
52	TUC	Volcán	Alto Delta	1								1
53	TUC	Volcán	Alto Delta	2									1																1
54	TUC	Volcán	Alto Delta	1
55	TUC	Volcán	Alto Delta	1														1
56	TUC	Volcán	Alto Delta
57	TUC	Volcán	Alto Delta
58	TUC	Volcán	Alto Delta
59	TUC	Volcán	Alto Delta	2
60	TUC	Volcán	Alto Delta
61	TUC	Volcán	Alto Delta	1				1		1	1					1
62	TUC	Volcán	Alto Delta	1
63	TUC	Volcán	Alto Delta	7		1
64	TUC	Volcán	Alto Delta
65	TUC	Volcán	Alto Delta
66	TUC	Volcán	Alto Delta
500	AD	Santa Rosa de Araguao	Alto Delta	1											1
1	AD	Kabiajoko	Guayo
2	AD	Burojoida	Guayo
6	AD	Dajumana	Guayo				1
7	AD	Hanakasi	Guayo			1
8	AD	Wanoko	Guayo
9	AD	Guayaboroina	Guayo
13	AD	Jarijidoina	Guayo	2
14	AD	Jarijidoina	Guayo	1
15	AD	Ibute	Guayo
16	AD	Ibute	Guayo										1
17	AD	Boca de Cojina	Guayo		1
18	AD	Boca de Cojina	Guayo
19	AD	Ajanocoida	Guayo	2
20	AD	Ajanocoida	Guayo	4		2
21	AD	Jioruina	Guayo	2
22	AD	Jioruina	Guayo	1
23	AD	Joroeneina	Guayo	3
24	AD	Joroeneina	Guayo									1
25	AD	Joroeneina	Guayo										1
29	AD	Jimurina	Guayo
30	AD	Jimurina	Guayo
31	AD	Jimurina	Guayo
35	AD	Isla de Buari	Guayo	3
36	AD	Isla de Buari	Guayo
37	AD	Isla de Buari	Guayo
41	AD	Usidu	Guayo	1
42	AD	Usidu	Guayo	3
43	AD	Usidu	Guayo	1								1
44	AD	Isla de Jobure	Guayo	2
45	AD	Isla de Jobure	Guayo				1
46	AD	Isla de Jobure	Guayo	2
47	AD	Cocoina	Guayo
48	AD	Cocoina	Guayo
49	AD	Cocoina	Guayo																							1
50	AD	Idoburojo	Guayo			1
51	AD	Idoburojo	Guayo	3		4						1
52	AD	Idoburojo	Guayo	2
56	AD	Caño Yeri	Guayo						1
57	AD	Caño Yeri	Guayo	5					1
58	AD	Caño Yeri	Guayo	2						1									1
71	AD	Guajakajisi	Guayo	3		1		1
72	AD	Guajakajisi	Guayo
73	AD	Guajakajisi	Guayo	3
74	AD	Guajakajisi	Guayo	2		1																1
75	AD	Yaguara	Guayo	1	1	3									2									1
76	AD	Yaguara	Guayo			1
77	AD	Yaguara	Guayo
78	AD	Yaguara	Guayo			1
79	AD	Jeukubaka	Guayo
80	AD	Jeukubaka	Guayo			1				2
81	AD	Jeukubaka	Guayo									1
82	AD	Jeukubaka	Guayo						1
83	AD	Sarewabanoko I	Guayo	7
84	AD	Sarewabanoko I	Guayo	2		1
85	AD	Sarewabanoko I	Guayo	1
86	AD	Sarewabanoko I	Guayo	1
87	AD	Sarewabanoko II	Guayo	3			1
88	AD	Sarewabanoko II	Guayo		1
89	AD	Sarewabanoko II	Guayo		1	1
90	AD	Sarewabanoko II	Guayo				2						2
91	AD	Jotabuidanoko	Guayo	4
92	AD	Jotabuidanoko	Guayo	3
93	AD	Jotabuidanoko	Guayo
94	AD	Jotabuidanoko	Guayo
95	AD	Tobewabanoko	Guayo
96	AD	Tobewabanoko	Guayo
97	AD	Tobewabanoko	Guayo	5
98	AD	Tobewabanoko	Guayo	1		1
104	AD	Isla de Barril	Guayo
105	AD	Isla de Barril	Guayo	3																		1
106	AD	Isla de Barril	Guayo	3		1
107	AD	Isla de Barril	Guayo			1						1
108	AD	Isla de Barril	Guayo
109	AD	Jobotoboto	Guayo	1		1
110	AD	Jobotoboto	Guayo
111	AD	Jobotoboto	Guayo	1
112	AD	Jobotoboto	Guayo	1		1
113	AD	Jobotoboto	Guayo				3
114	AD	Juaneida de Guayo	Guayo	1		1			1
115	AD	Juaneida de Guayo	Guayo
116	AD	Juaneida de Guayo	Guayo
117	AD	Juaneida de Guayo	Guayo
118	AD	Juaneida de Guayo	Guayo	1
119	AD	Jaruina	Guayo	5																										1
120	AD	Jaruina	Guayo
121	AD	Jaruina	Guayo	3
122	AD	Jaruina	Guayo	1
123	AD	Jaruina	Guayo
124	AD	Komaro	Guayo			1
125	AD	Komaro	Guayo	1
126	AD	Komaro	Guayo
127	AD	Komaro	Guayo	3		3
128	AD	Komaro	Guayo	1
129	AD	Barakataina I y II	Guayo	1
130	AD	Barakataina I y II	Guayo						2												1
131	AD	Barakataina I y II	Guayo	1						1
132	AD	Barakataina I y II	Guayo	1		1
133	AD	Barakataina I y II	Guayo
139	AD	Ajimuruina	Guayo
140	AD	Ajimuruina	Guayo	1		1
141	AD	Ajimuruina	Guayo	1
142	AD	Ajimuruina	Guayo		3		1	1
143	AD	Ajimuruina	Guayo			1
144	AD	Jimuruina	Guayo			2											1
145	AD	Jimuruina	Guayo				1
146	AD	Jimuruina	Guayo	2
147	AD	Jimuruina	Guayo
148	AD	Jimuruina	Guayo	2
154	AD	Batokonoko	Guayo
155	AD	Batokonoko	Guayo	8
156	AD	Batokonoko	Guayo	4								1
157	AD	Batokonoko	Guayo
158	AD	Batokonoko	Guayo	1
159	AD	Batokonoko	Guayo
160	AD	Nayara	Guayo
161	AD	Nayara	Guayo	2
162	AD	Nayara	Guayo
163	AD	Nayara	Guayo	5
164	AD	Nayara	Guayo	3
165	AD	Nayara	Guayo			1
166	AD	Santa Rosa de Guayo	Guayo			4
167	AD	Santa Rosa de Guayo	Guayo
168	AD	Santa Rosa de Guayo	Guayo	4
169	AD	Santa Rosa de Guayo	Guayo	2				1
170	AD	Santa Rosa de Guayo	Guayo
171	AD	Santa Rosa de Guayo	Guayo	2					1
178	AD	Jokabanoko I y II	Guayo
179	AD	Jokabanoko I y II	Guayo
180	AD	Jokabanoko I y II	Guayo			1
181	AD	Jokabanoko I y II	Guayo	1	2		2
182	AD	Jokabanoko I y II	Guayo	1	1		1	1
183	AD	Jokabanoko I y II	Guayo		2	1
184	AD	Moninoko	Guayo	2				1
185	AD	Moninoko	Guayo	2
186	AD	Moninoko	Guayo
187	AD	Moninoko	Guayo					1
188	AD	Moninoko	Guayo	2
189	AD	Moninoko	Guayo					1
190	AD	Tekoburojo	Guayo	4
191	AD	Tekoburojo	Guayo
192	AD	Tekoburojo	Guayo	4		3
193	AD	Tekoburojo	Guayo	2		1
194	AD	Tekoburojo	Guayo	1		2
195	AD	Tekoburojo	Guayo	4
196	AD	Tekoburojo	Guayo	5
204	AD	Barakataina I y II	Guayo
205	AD	Barakataina I y II	Guayo	1		1
206	AD	Barakataina I y II	Guayo	8
207	AD	Barakataina I y II	Guayo
208	AD	Barakataina I y II	Guayo
209	AD	Barakataina I y II	Guayo
210	AD	Barakataina I y II	Guayo			2
211	AD	Jokabanoko I y II	Guayo
212	AD	Jokabanoko I y II	Guayo
213	AD	Jokabanoko I y II	Guayo
214	AD	Jokabanoko I y II	Guayo
215	AD	Jokabanoko I y II	Guayo			1
216	AD	Jokabanoko I y II	Guayo	2
217	AD	Jokabanoko I y II	Guayo	5
226	AD	Guayaboroina	Guayo	1
227	AD	Guayaboroina	Guayo
228	AD	Guayaboroina	Guayo				1
229	AD	Guayaboroina	Guayo	1			1
230	AD	Guayaboroina	Guayo
231	AD	Guayaboroina	Guayo
232	AD	Guayaboroina	Guayo
233	AD	Guayaboroina	Guayo
234	AD	Campo Alegre	Guayo	6
235	AD	Campo Alegre	Guayo	2
236	AD	Campo Alegre	Guayo	4
237	AD	Campo Alegre	Guayo	1
238	AD	Campo Alegre	Guayo	1
239	AD	Campo Alegre	Guayo	4
240	AD	Campo Alegre	Guayo	7
241	AD	Campo Alegre	Guayo	1
242	AD	Campo Alegre	Guayo	1
252	AD	La Mora	Guayo	1
253	AD	La Mora	Guayo	2
254	AD	La Mora	Guayo	2
255	AD	La Mora	Guayo	1	1
256	AD	La Mora	Guayo	2
257	AD	La Mora	Guayo	1
258	AD	La Mora	Guayo	3
259	AD	La Mora	Guayo
260	AD	La Mora	Guayo	1
261	AD	La Mora	Guayo							1
262	AD	Kuamujo	Guayo	1
263	AD	Kuamujo	Guayo	1				1
264	AD	Kuamujo	Guayo	2
265	AD	Kuamujo	Guayo	1
266	AD	Kuamujo	Guayo
267	AD	Kuamujo	Guayo	3	2																1
268	AD	Kuamujo	Guayo
269	AD	Kuamujo	Guayo	2
270	AD	Kuamujo	Guayo
271	AD	Kuamujo	Guayo
282	AD	Jerisabanoko	Guayo	4		1
283	AD	Jerisabanoko	Guayo							1
284	AD	Jerisabanoko	Guayo									1
285	AD	Jerisabanoko	Guayo	3		1
286	AD	Jerisabanoko	Guayo	1	2	1		1
287	AD	Jerisabanoko	Guayo			2
288	AD	Jerisabanoko	Guayo									1
289	AD	Jerisabanoko	Guayo
290	AD	Jerisabanoko	Guayo	1
291	AD	Jerisabanoko	Guayo
292	AD	Jerisabanoko	Guayo			1
304	AD	Jobure de Guayo	Guayo
305	AD	Jobure de Guayo	Guayo		1
306	AD	Jobure de Guayo	Guayo																		1
307	AD	Jobure de Guayo	Guayo	1
308	AD	Jobure de Guayo	Guayo	1	2
309	AD	Jobure de Guayo	Guayo
310	AD	Jobure de Guayo	Guayo
311	AD	Jobure de Guayo	Guayo
312	AD	Jobure de Guayo	Guayo				2
313	AD	Jobure de Guayo	Guayo	1
314	AD	Jobure de Guayo	Guayo	2
315	AD	Jobure de Guayo	Guayo			1
316	AD	Jobure de Guayo	Guayo	1
317	AD	Merejina	Guayo
318	AD	Merejina	Guayo			1	1
319	AD	Merejina	Guayo	1
320	AD	Merejina	Guayo	4		5
321	AD	Merejina	Guayo			2
322	AD	Merejina	Guayo
323	AD	Merejina	Guayo
324	AD	Merejina	Guayo	9
325	AD	Merejina	Guayo			1			4
326	AD	Merejina	Guayo	1
327	AD	Merejina	Guayo	2
328	AD	Merejina	Guayo
329	AD	Merejina	Guayo	3
330	AD	Merejina	Guayo
380	AD	Murako	Guayo	1
381	AD	Murako	Guayo
382	AD	Murako	Guayo
383	AD	Murako	Guayo	1
384	AD	Murako	Guayo	8																1
385	AD	Murako	Guayo	2
386	AD	Murako	Guayo
387	AD	Murako	Guayo								3
388	AD	Murako	Guayo	2
389	AD	Murako	Guayo	2
390	AD	Murako	Guayo	2
391	AD	Murako	Guayo	1
392	AD	Murako	Guayo	1
393	AD	Murako	Guayo
394	AD	Murako	Guayo	1
395	AD	Murako	Guayo	4
396	AD	Murako	Guayo
397	AD	Murako	Guayo	1
398	AD	Murako	Guayo	1
399	AD	Murako	Guayo	3
421	AD	San Francisco de Guayo	Guayo
422	AD	San Francisco de Guayo	Guayo
423	AD	San Francisco de Guayo	Guayo
424	AD	San Francisco de Guayo	Guayo
425	AD	San Francisco de Guayo	Guayo
426	AD	San Francisco de Guayo	Guayo
427	AD	San Francisco de Guayo	Guayo	2	1
428	AD	San Francisco de Guayo	Guayo	1		1	1
429	AD	San Francisco de Guayo	Guayo			2	1																													1
430	AD	San Francisco de Guayo	Guayo
431	AD	San Francisco de Guayo	Guayo	1
432	AD	San Francisco de Guayo	Guayo
433	AD	San Francisco de Guayo	Guayo
434	AD	San Francisco de Guayo	Guayo
435	AD	San Francisco de Guayo	Guayo
436	AD	San Francisco de Guayo	Guayo
437	AD	San Francisco de Guayo	Guayo
438	AD	San Francisco de Guayo	Guayo
439	AD	San Francisco de Guayo	Guayo
440	AD	San Francisco de Guayo	Guayo										1
441	AD	San Francisco de Guayo	Guayo	2																																	1
442	AD	San Francisco de Guayo	Guayo	4	1
443	AD	San Francisco de Guayo	Guayo
444	AD	San Francisco de Guayo	Guayo
445	AD	San Francisco de Guayo	Guayo
446	AD	San Francisco de Guayo	Guayo
447	AD	San Francisco de Guayo	Guayo
448	AD	San Francisco de Guayo	Guayo
449	AD	San Francisco de Guayo	Guayo
450	AD	San Francisco de Guayo	Guayo				2
451	AD	San Francisco de Guayo	Guayo
452	AD	San Francisco de Guayo	Guayo
453	AD	San Francisco de Guayo	Guayo
454	AD	San Francisco de Guayo	Guayo
455	AD	San Francisco de Guayo	Guayo	1
456	AD	San Francisco de Guayo	Guayo	5
457	AD	San Francisco de Guayo	Guayo
458	AD	San Francisco de Guayo	Guayo	1
459	AD	San Francisco de Guayo	Guayo
460	AD	San Francisco de Guayo	Guayo	4									2
461	AD	San Francisco de Guayo	Guayo
462	AD	San Francisco de Guayo	Guayo
463	AD	San Francisco de Guayo	Guayo
464	AD	San Francisco de Guayo	Guayo
465	AD	San Francisco de Guayo	Guayo	1		1			1	1					1		1
466	AD	San Francisco de Guayo	Guayo
467	AD	San Francisco de Guayo	Guayo
468	AD	San Francisco de Guayo	Guayo
469	AD	San Francisco de Guayo	Guayo
470	AD	San Francisco de Guayo	Guayo
471	AD	San Francisco de Guayo	Guayo						2																													1
472	AD	San Francisco de Guayo	Guayo
473	AD	San Francisco de Guayo	Guayo	4
474	AD	San Francisco de Guayo	Guayo	1	1
475	AD	San Francisco de Guayo	Guayo	5
476	AD	San Francisco de Guayo	Guayo
477	AD	San Francisco de Guayo	Guayo
478	AD	San Francisco de Guayo	Guayo
479	AD	San Francisco de Guayo	Guayo
480	AD	San Francisco de Guayo	Guayo	2											1
481	AD	San Francisco de Guayo	Guayo
482	AD	San Francisco de Guayo	Guayo
483	AD	San Francisco de Guayo	Guayo
484	AD	San Francisco de Guayo	Guayo	1
485	AD	San Francisco de Guayo	Guayo
486	AD	San Francisco de Guayo	Guayo	6		4
487	AD	San Francisco de Guayo	Guayo				1							1
488	AD	San Francisco de Guayo	Guayo
489	AD	San Francisco de Guayo	Guayo
490	AD	San Francisco de Guayo	Guayo
491	AD	San Francisco de Guayo	Guayo
492	AD	San Francisco de Guayo	Guayo			2
493	AD	San Francisco de Guayo	Guayo	1
494	AD	San Francisco de Guayo	Guayo	2
495	AD	San Francisco de Guayo	Guayo
496	AD	San Francisco de Guayo	Guayo
497	AD	San Francisco de Guayo	Guayo			2
498	AD	San Francisco de Guayo	Guayo	1
499	AD	San Francisco de Guayo	Guayo
3	AD	Abuenekabanoco	Curiapo						1
5	AD	Ildamananoco	Curiapo		2
10	AD	Bocoboco	Curiapo
26	AD	Jotajana II	Curiapo	2
27	AD	Jotajana II	Curiapo											5
28	AD	Jotajana II	Curiapo
32	AD	Boca de Nabakojoida	Curiapo				1
33	AD	Boca de Nabakojoida	Curiapo	1										2
34	AD	Boca de Nabakojoida	Curiapo
38	AD	Nabakojoida	Curiapo			1
39	AD	Nabakojoida	Curiapo		1	2
40	AD	Nabakojoida	Curiapo
53	AD	Guayaboroina de Curiapo	Curiapo	1
54	AD	Guayaboroina de Curiapo	Curiapo
55	AD	Guayaboroina de Curiapo	Curiapo	1
63	AD	Nabakojoida	Curiapo
64	AD	Nabakojoida	Curiapo	4
65	AD	Nabakojoida	Curiapo	4
66	AD	Nabakojoida	Curiapo
99	AD	Jotajana I	Curiapo
100	AD	Jotajana I	Curiapo	1
101	AD	Jotajana I	Curiapo
102	AD	Jotajana I	Curiapo
103	AD	Jotajana I	Curiapo	3
134	AD	Moraina de Curiapo	Curiapo	1
135	AD	Moraina de Curiapo	Curiapo
136	AD	Moraina de Curiapo	Curiapo
137	AD	Moraina de Curiapo	Curiapo
138	AD	Moraina de Curiapo	Curiapo	4
172	AD	Moraina	Curiapo			1
173	AD	Moraina	Curiapo	2
174	AD	Moraina	Curiapo	1
175	AD	Moraina	Curiapo	1
176	AD	Moraina	Curiapo			4
177	AD	Moraina	Curiapo	1
218	AD	Osibukabinoko	Curiapo		1
219	AD	Osibukabinoko	Curiapo		2
220	AD	Osibukabinoko	Curiapo	2
221	AD	Osibukabinoko	Curiapo	3
222	AD	Osibukabinoko	Curiapo		2
223	AD	Osibukabinoko	Curiapo		2
224	AD	Osibukabinoko	Curiapo
225	AD	Osibukabinoko	Curiapo	1
293	AD	Ajotejana	Curiapo
294	AD	Ajotejana	Curiapo
295	AD	Ajotejana	Curiapo	1	1	1														2
296	AD	Ajotejana	Curiapo
297	AD	Ajotejana	Curiapo
298	AD	Ajotejana	Curiapo
299	AD	Ajotejana	Curiapo					2
300	AD	Ajotejana	Curiapo	1
301	AD	Ajotejana	Curiapo
302	AD	Ajotejana	Curiapo	1
303	AD	Ajotejana	Curiapo			1
362	AD	Curiapo	Curiapo
363	AD	Curiapo	Curiapo	1
364	AD	Curiapo	Curiapo	1
365	AD	Curiapo	Curiapo							1
366	AD	Curiapo	Curiapo				1
367	AD	Curiapo	Curiapo	2						2
368	AD	Curiapo	Curiapo
369	AD	Curiapo	Curiapo
370	AD	Curiapo	Curiapo
371	AD	Curiapo	Curiapo	1
372	AD	Curiapo	Curiapo			2											1		1
373	AD	Curiapo	Curiapo	2
374	AD	Curiapo	Curiapo
375	AD	Curiapo	Curiapo	1
376	AD	Curiapo	Curiapo																																					1
377	AD	Curiapo	Curiapo	4		1																																	1
378	AD	Curiapo	Curiapo	2
379	AD	Curiapo	Curiapo	4		2
400	AD	Kaiwire	Curiapo	2
401	AD	Kaiwire	Curiapo		3
402	AD	Kaiwire	Curiapo	1	1												2
403	AD	Kaiwire	Curiapo	1			1						1
404	AD	Kaiwire	Curiapo
405	AD	Kaiwire	Curiapo	1
406	AD	Kaiwire	Curiapo
407	AD	Kaiwire	Curiapo	1
408	AD	Kaiwire	Curiapo	1	5
409	AD	Kaiwire	Curiapo
410	AD	Kaiwire	Curiapo
411	AD	Kaiwire	Curiapo	1	2					1
412	AD	Kaiwire	Curiapo	2
413	AD	Kaiwire	Curiapo						1
414	AD	Kaiwire	Curiapo	2
415	AD	Kaiwire	Curiapo			2
416	AD	Kaiwire	Curiapo
417	AD	Kaiwire	Curiapo	5
418	AD	Kaiwire	Curiapo
419	AD	Kaiwire	Curiapo	5			1
420	AD	Kaiwire	Curiapo	1	2																														1
4	AD	Jotasanuka	Nabasanuka
11	AD	Barakaro	Nabasanuka	7
12	AD	Barakaro	Nabasanuka	3
59	AD	Kuarejoro	Nabasanuka			1
60	AD	Kuarejoro	Nabasanuka
61	AD	Kuarejoro	Nabasanuka
62	AD	Kuarejoro	Nabasanuka	2		1									1
67	AD	Mojabaina de Bonoina	Nabasanuka
68	AD	Mojabaina de Bonoina	Nabasanuka
69	AD	Mojabaina de Bonoina	Nabasanuka
70	AD	Mojabaina de Bonoina	Nabasanuka	1			1
149	AD	Burojosanuka	Nabasanuka
150	AD	Burojosanuka	Nabasanuka	1		3
151	AD	Burojosanuka	Nabasanuka	2		8
152	AD	Burojosanuka	Nabasanuka								6
153	AD	Burojosanuka	Nabasanuka	7
197	AD	Jobasujuru	Nabasanuka	1		1
198	AD	Jobasujuru	Nabasanuka			1
199	AD	Jobasujuru	Nabasanuka
200	AD	Jobasujuru	Nabasanuka	3
201	AD	Jobasujuru	Nabasanuka			1
202	AD	Jobasujuru	Nabasanuka
203	AD	Jobasujuru	Nabasanuka	2
243	AD	Musimurina	Nabasanuka	2
244	AD	Musimurina	Nabasanuka	3
245	AD	Musimurina	Nabasanuka
246	AD	Musimurina	Nabasanuka	4
247	AD	Musimurina	Nabasanuka	1			2
248	AD	Musimurina	Nabasanuka	1			2
249	AD	Musimurina	Nabasanuka			1
250	AD	Musimurina	Nabasanuka
251	AD	Musimurina	Nabasanuka
272	AD	Siawani	Nabasanuka						1
273	AD	Siawani	Nabasanuka						1	1					1	2
274	AD	Siawani	Nabasanuka								2
275	AD	Siawani	Nabasanuka
276	AD	Siawani	Nabasanuka																					1										1
277	AD	Siawani	Nabasanuka									1
278	AD	Siawani	Nabasanuka
279	AD	Siawani	Nabasanuka	1
280	AD	Siawani	Nabasanuka	1
281	AD	Siawani	Nabasanuka															1
331	AD	Nabasanuka	Nabasanuka	1
332	AD	Nabasanuka	Nabasanuka
333	AD	Nabasanuka	Nabasanuka			3
334	AD	Nabasanuka	Nabasanuka	2
335	AD	Nabasanuka	Nabasanuka
336	AD	Nabasanuka	Nabasanuka
337	AD	Nabasanuka	Nabasanuka	1						1				1
338	AD	Nabasanuka	Nabasanuka	1												1
339	AD	Nabasanuka	Nabasanuka
340	AD	Nabasanuka	Nabasanuka
341	AD	Nabasanuka	Nabasanuka	1
342	AD	Nabasanuka	Nabasanuka	1		1
343	AD	Nabasanuka	Nabasanuka
344	AD	Nabasanuka	Nabasanuka	1
345	AD	Bonoina	Nabasanuka
346	AD	Bonoina	Nabasanuka			1
347	AD	Bonoina	Nabasanuka
348	AD	Bonoina	Nabasanuka
349	AD	Bonoina	Nabasanuka
350	AD	Bonoina	Nabasanuka
351	AD	Bonoina	Nabasanuka
352	AD	Bonoina	Nabasanuka	3
353	AD	Bonoina	Nabasanuka	3
354	AD	Bonoina	Nabasanuka
355	AD	Bonoina	Nabasanuka
356	AD	Bonoina	Nabasanuka				2
357	AD	Bonoina	Nabasanuka
358	AD	Bonoina	Nabasanuka	7
359	AD	Bonoina	Nabasanuka
360	AD	Bonoina	Nabasanuka	2
361	AD	Bonoina	Nabasanuka
			TOTAL	733	50	227	48	38	29	18	17	13	10	9	7	6	6	3	3	3	3	2	2	2	1	1	1	1	1	1	1	1	1	1	1	1	1	1	1	1

## Sheet: Causes of death_age groups
				Neonatal					1-11months					1-5years					6-12 years
Mother's ID	Community	Subregion		Diarrhea	Pneumonia. RTI	Other	Other Causes:		Diarrhea	Pneumonia. RTI	Other	Other Causes:		Diarrhea	Pneumonia. RTI	Other	Other Causes:		Diarrhea	Pneumonia. RTI	Other	Other Causes:
1	Isla del Muerto	PED-Manamo
4	Winamorena I	PED-Manamo							2	1	1	Cholera (1)		6	1	1	Cholera (1)
5	Winamorena I	PED-Manamo							1		1	Unknown (1)
6	Winamorena I	PED-Manamo				1	Unknown (1)		1
11	Isla de Conoto	PED-Manamo
12	Isla de Conoto	PED-Manamo		1					3					1
13	Isla de Conoto	PED-Manamo
14	Isla de Conoto	PED-Manamo							2
27	Kajirina	PED-Manamo									3	Febrile Syndrome Unspecified (3)				6	Febrile Syndrome Unspecified (6)
28	Morocoto	PED-Manamo													1
29	Morocoto	PED-Manamo
30	Morocoto	PED-Manamo							4					1	1
31	Morocoto	PED-Manamo				5	Preterm-Birth (4) / Birth Asphyxia-Meconium aspiration (1)								1
32	Morocoto	PED-Manamo				1	Preterm-Birth (1)
33	Morocoto	PED-Manamo							1					4							1	Maternal death (during labor) (1)
34	Morocoto	PED-Manamo				1	Birth Asphyxia-Meconium aspiration (1)				1	Malnutrition(1)
35	Morocoto	PED-Manamo													1
36	Morocoto	PED-Manamo																		1
37	Morocoto	PED-Manamo
38	Morocoto	PED-Manamo							1
39	Wakajara de Manamo	PED-Manamo												1
40	Wakajara de Manamo	PED-Manamo				1	Preterm-Birth (1)		1	1	2	Febrile Syndrome Unspecified(1) / Edema (1)		1
41	Wakajara de Manamo	PED-Manamo
42	Wakajara de Manamo	PED-Manamo
43	Wakajara de Manamo	PED-Manamo							2
44	Wakajara de Manamo	PED-Manamo							2					1	1
45	Wakajara de Manamo	PED-Manamo		1										1
46	Wakajara de Manamo	PED-Manamo														1	Unknown (1)
47	Wakajara de Manamo	PED-Manamo									1	Unknown (1)				1	Unknown (1)
48	Wakajara de Manamo	PED-Manamo												1
49	Wakajara de Manamo	PED-Manamo												1
62	Winamorena II	PED-Manamo				2	Preterm-Birth (2)
63	Winamorena II	PED-Manamo
64	Winamorena II	PED-Manamo							1					1							1	Electrocution (1)
65	Winamorena II	PED-Manamo		1					1
66	Winamorena II	PED-Manamo
67	Winamorena II	PED-Manamo
68	Winamorena II	PED-Manamo								1				1	1
69	Winamorena II	PED-Manamo							1	1	1	Dengue Fever (1)			1
70	Winamorena II	PED-Manamo		1	2				1	1					1
71	Winamorena II	PED-Manamo												2						1
72	Winamorena II	PED-Manamo													1
73	Winamorena II	PED-Manamo
74	Winamorena II	PED-Manamo		1					2
75	Winamorena II	PED-Manamo							3
76	Barrio Chino	PED-Manamo							1					2
77	Barrio Chino	PED-Manamo								1	1	Febrile Syndrome Unspecified (1)
78	Barrio Chino	PED-Manamo
79	Barrio Chino	PED-Manamo														1	Mumps - Impetigo (1)
80	Barrio Chino	PED-Manamo												2
81	Barrio Chino	PED-Manamo
82	Barrio Chino	PED-Manamo												1
83	Barrio Chino	PED-Manamo
84	Barrio Chino	PED-Manamo							3	2	1	Unknown (1)
85	Barrio Chino	PED-Manamo							1
86	Barrio Chino	PED-Manamo							4
87	Barrio Chino	PED-Manamo									1	Unknown (1)
88	Barrio Chino	PED-Manamo									1	Febrile Syndrome Unspecified (1)
89	Barrio Chino	PED-Manamo
90	Barrio Chino	PED-Manamo
91	La Culebrita	PED-Manamo							1					1
92	La Culebrita	PED-Manamo
93	La Culebrita	PED-Manamo							1						1
94	La Culebrita	PED-Manamo
95	Isla Misteriosa	PED-Manamo
96	Isla Misteriosa	PED-Manamo								4
97	Isla Misteriosa	PED-Manamo
98	Isla Misteriosa	PED-Manamo							1
2	Najakaina	PED-Waranoko
3	Najakaina	PED-Waranoko							2
7	Jagüey de los Cocos	PED-Waranoko
8	Jagüey de los Cocos	PED-Waranoko			1					3					1
9	Jagüey de los Cocos	PED-Waranoko
10	Jagüey de los Cocos	PED-Waranoko								1					1
15	Simoina	PED-Waranoko								3
16	Simoina	PED-Waranoko
17	Simoina	PED-Waranoko							2	1						1	Unknown (1)
18	Simoina	PED-Waranoko							1
19	Simoina	PED-Waranoko
20	Kajirina	PED-Waranoko							2					1	1
21	Kajirina	PED-Waranoko							2	2
22	Kajirina	PED-Waranoko								5											1	Witchcraft (1)
23	Kajirina	PED-Waranoko								1
24	Kajirina	PED-Waranoko									5	Febrile Syndrome Unspecified (5)
25	Kajirina	PED-Waranoko							1					3	2
26	Kajirina	PED-Waranoko									3	Febrile Syndrome Unspecified (2) / Gastroenteritis (1)				1	Gastroenteritis (1)
50	Waranoko II	PED-Waranoko							2						1	1	Unknown (1)
51	Waranoko II	PED-Waranoko							1					1	1	1	Gastroenteritis (1)
52	Waranoko II	PED-Waranoko							6	4
53	Waranoko II	PED-Waranoko								1
54	Waranoko II	PED-Waranoko			1					4	1	Impetigo (1)
55	Waranoko II	PED-Waranoko								1	2	Witchcraft (1) / Malnutrition (1)		2
56	Waranoko II	PED-Waranoko								2
57	Waranoko II	PED-Waranoko
58	Waranoko II	PED-Waranoko														1	Unknown (1)
59	Waranoko II	PED-Waranoko
60	Waranoko II	PED-Waranoko												1
61	Waranoko II	PED-Waranoko							1						1
1	Cojina II	Makareo-Mariusa									1	CNS Infection (1)		1		1	Drowning (1)
2	Nabasanuka de Makareo	Makareo-Mariusa								3
4	Isla de Tucupita	Makareo-Mariusa				1	Preterm-Birth (1)		2		1	Impetigo (1)
5	Isla de Tucupita	Makareo-Mariusa							1	1				1	2	1	Malnutrition - Candidal Stomatitis (1)
13	La Lagunita de Mariusa	Makareo-Mariusa														1	Unknown (1)
14	La Lagunita de Mariusa	Makareo-Mariusa							3	4
15	La Lagunita de Mariusa	Makareo-Mariusa							6
16	La Lagunita de Mariusa	Makareo-Mariusa							4
17	La Lagunita de Mariusa	Makareo-Mariusa								1
18	La Lagunita de Mariusa	Makareo-Mariusa								1
19	La Lagunita de Mariusa	Makareo-Mariusa
20	La Lagunita de Mariusa	Makareo-Mariusa
21	La Lagunita de Mariusa	Makareo-Mariusa							1					1
31	Punta Pescador	Makareo-Mariusa
32	Punta Pescador	Makareo-Mariusa
33	Punta Pescador	Makareo-Mariusa												2
34	Punta Pescador	Makareo-Mariusa
35	Punta Pescador	Makareo-Mariusa				1	Preterm-Birth (1)				1	Malnutrition - Candidal Stomatitis (1)
36	Punta Pescador	Makareo-Mariusa												1
37	Punta Pescador	Makareo-Mariusa								2				1	1
38	Punta Pescador	Makareo-Mariusa								1					3
39	Punta Pescador	Makareo-Mariusa								1
40	Punta Pescador	Makareo-Mariusa				1	Congenital abnormality (1)			1	1	Trauma (1)
41	Punta Pescador	Makareo-Mariusa							2					8
42	Punta Pescador	Makareo-Mariusa												1
43	Punta Pescador	Makareo-Mariusa
44	Punta Pescador	Makareo-Mariusa									1	Febrile Syndrome Unspecified (1)
67	Mariusa	Makareo-Mariusa
68	Mariusa	Makareo-Mariusa							1					1
69	Mariusa	Makareo-Mariusa							3	2				2	1
70	Mariusa	Makareo-Mariusa
71	Mariusa	Makareo-Mariusa							7
72	Mariusa	Makareo-Mariusa				1	Birth asphyxia - Meconium Aspiration (1)			1				3
73	Mariusa	Makareo-Mariusa			1	1	Febrile Syndrome Unspecified (3)				1	Febrile Syndrome Unspecified (1)		1	2	1	Febrile Syndrome Unspecified (1)
74	Mariusa	Makareo-Mariusa												2	2
75	Mariusa	Makareo-Mariusa												3	1
76	Mariusa	Makareo-Mariusa							8		1	Febrile Syndrome Unspecified (1)		1
77	Mariusa	Makareo-Mariusa
78	Mariusa	Makareo-Mariusa								1				1
79	Mariusa	Makareo-Mariusa												1	1
80	Mariusa	Makareo-Mariusa												6	3				2
81	Mariusa	Makareo-Mariusa		1					5
82	Mariusa	Makareo-Mariusa
83	Mariusa	Makareo-Mariusa							9					4					2
84	Mariusa	Makareo-Mariusa									1	Unknown (1)
85	Mariusa	Makareo-Mariusa
86	Mariusa	Makareo-Mariusa							2	2				2
87	Mariusa	Makareo-Mariusa							6	1				1	2
88	Mariusa	Makareo-Mariusa
89	Mariusa	Makareo-Mariusa
90	Mariusa	Makareo-Mariusa
91	Mariusa	Makareo-Mariusa
6	Yacariyene	Alto Delta									1	Witchcraft (1)
7	Yacariyene	Alto Delta												1
8	Yacariyene	Alto Delta								1				1
9	Yacariyene	Alto Delta
10	Yacariyene	Alto Delta														2	Witchcraft (2)
11	Yacariyene	Alto Delta
12	Yacariyene	Alto Delta
22	Janokosebe	Alto Delta							1		1	Unknown (1)
23	Janokosebe	Alto Delta
24	Janokosebe	Alto Delta				1	Preterm-Birth (1)		1
25	Janokosebe	Alto Delta												1
26	Janokosebe	Alto Delta												2	1
27	Janokosebe	Alto Delta
28	Janokosebe	Alto Delta														2	Febrile Syndrome Unspecified (2)
29	Janokosebe	Alto Delta													1
30	Janokosebe	Alto Delta				1	Unknown (1)							1
45	Volcán	Alto Delta												1
46	Volcán	Alto Delta
47	Volcán	Alto Delta
48	Volcán	Alto Delta							1					3							1	Childhood TB (1)
49	Volcán	Alto Delta							3
50	Volcán	Alto Delta							1
51	Volcán	Alto Delta
52	Volcán	Alto Delta				1	Birth Asphyxia-Meconium aspiration (1)							1
53	Volcán	Alto Delta									1	Drowning (1)		2		1	Toxic effect of unspecified Substances (1)
54	Volcán	Alto Delta												1
55	Volcán	Alto Delta				1	Congenital abnormality (1)							1
56	Volcán	Alto Delta
57	Volcán	Alto Delta
58	Volcán	Alto Delta
59	Volcán	Alto Delta												2
60	Volcán	Alto Delta
61	Volcán	Alto Delta									2	Witchcraft (1) / Malnutrition (1)		1		2	Febrile Syndrome Unspecified (1) / Impetigo (1)
62	Volcán	Alto Delta												1
63	Volcán	Alto Delta							2	1				5
64	Volcán	Alto Delta
65	Volcán	Alto Delta
66	Volcán	Alto Delta
500	Santa Rosa de Araguao	Alto Delta				1	Pertussis (1)		1
1	Kabiajoko	Guayo
2	Burojoida	Guayo
6	Dajumana	Guayo				1	Unknown (1)
7	Hanakasi	Guayo								1
8	Wanoko	Guayo
9	Guayaboroina	Guayo
13	Jarijidoina	Guayo							2
14	Jarijidoina	Guayo							1
15	Ibute	Guayo
16	Ibute	Guayo									1	Drowning (1)
17	Boca de Cojina	Guayo									1	Gastroenteritis (1)
18	Boca de Cojina	Guayo
19	Ajanocoida	Guayo							2
20	Ajanocoida	Guayo							1	1				3	1
21	Jioruina	Guayo							1					1
22	Jioruina	Guayo							1
23	Joroeneina	Guayo							2					1
24	Joroeneina	Guayo				1	Birth Asphyxia - Meconium aspiration (1)
25	Joroeneina	Guayo														1	Drowning (1)
29	Jimurina	Guayo
30	Jimurina	Guayo
31	Jimurina	Guayo
35	Isla de Buari	Guayo												3
36	Isla de Buari	Guayo
37	Isla de Buari	Guayo
41	Usidu	Guayo							1
42	Usidu	Guayo												3
43	Usidu	Guayo				1	Birth Asphyxia - Meconium aspiration (1)		1
44	Isla de Jobure	Guayo												2
45	Isla de Jobure	Guayo				1	Unknown (1)
46	Isla de Jobure	Guayo							1					1
47	Cocoina	Guayo
48	Cocoina	Guayo
49	Cocoina	Guayo																			1	AIDS (1)
50	Idoburojo	Guayo								1
51	Idoburojo	Guayo				1	Birth Asphyxia - Meconium aspiration (1)		1	2				2	2
52	Idoburojo	Guayo							1					1
56	Caño Yeri	Guayo				1	Preterm-Birth (1)
57	Caño Yeri	Guayo				1	Preterm-Birth (1)		2					3
58	Caño Yeri	Guayo							1		1	Malnutrition (1)		1							1	Trauma (1)
71	Guajakajisi	Guayo							3	1											1	Febrile Syndrome Unspecified (1)
72	Guajakajisi	Guayo
73	Guajakajisi	Guayo							1					2
74	Guajakajisi	Guayo				1	Birth Trauma (1)		2	1
75	Yaguara	Guayo							1	1					1	3	Pertussis (2) / Ascariasis - Intestinal Obstruction (1)			1	1	Gastroenteritis (1)
76	Yaguara	Guayo								1
77	Yaguara	Guayo
78	Yaguara	Guayo								1
79	Jeukubaka	Guayo
80	Jeukubaka	Guayo			1											2	Malnutrition (2)
81	Jeukubaka	Guayo				1	Birth Asphyxia - Meconium aspiration (1)
82	Jeukubaka	Guayo				1	Preterm Birth -IRDS (1)
83	Sarewabanoko I	Guayo							6					1
84	Sarewabanoko I	Guayo							1					1	1
85	Sarewabanoko I	Guayo							1
86	Sarewabanoko I	Guayo							1
87	Sarewabanoko II	Guayo							2					1							1	Unknown (1)
88	Sarewabanoko II	Guayo														1	Gastroenteritis (1)
89	Sarewabanoko II	Guayo													1						1	Gastroenteritis (1)
90	Sarewabanoko II	Guayo				1	Unknown (1)									2	Drowning (1) / Unknown (1)				1	Drowning (1)
91	Jotabuidanoko	Guayo												4
92	Jotabuidanoko	Guayo		1					2
93	Jotabuidanoko	Guayo
94	Jotabuidanoko	Guayo
95	Tobewabanoko	Guayo
96	Tobewabanoko	Guayo
97	Tobewabanoko	Guayo							2					3
98	Tobewabanoko	Guayo								1				1
104	Isla de Barril	Guayo
105	Isla de Barril	Guayo		1		1	Birth Trauma (1)		1					1
106	Isla de Barril	Guayo							3	1
107	Isla de Barril	Guayo				1	Birth Asphyxia - Meconium aspiration (1)			1
108	Isla de Barril	Guayo
109	Jobotoboto	Guayo								1				1
110	Jobotoboto	Guayo
111	Jobotoboto	Guayo												1
112	Jobotoboto	Guayo		1						1
113	Jobotoboto	Guayo				3	Unknown (3)
114	Juaneida de Guayo	Guayo				1	Preterm Birth -IRDS (1)		1	1
115	Juaneida de Guayo	Guayo
116	Juaneida de Guayo	Guayo
117	Juaneida de Guayo	Guayo
118	Juaneida de Guayo	Guayo							1
119	Jaruina	Guayo							2					3		1	Chickenpox (1)
120	Jaruina	Guayo
121	Jaruina	Guayo							1					2
122	Jaruina	Guayo												1
123	Jaruina	Guayo
124	Komaro	Guayo													1
125	Komaro	Guayo							1
126	Komaro	Guayo
127	Komaro	Guayo							1	1				1	2				1
128	Komaro	Guayo												1
129	Barakataina I y II	Guayo												1
130	Barakataina I y II	Guayo				2	Preterm-Birth IRDS (2)				1	Infanticide (1)
131	Barakataina I y II	Guayo							1							1	Malnutrition (1)
132	Barakataina I y II	Guayo			1				1
133	Barakataina I y II	Guayo
139	Ajimuruina	Guayo
140	Ajimuruina	Guayo												1	1
141	Ajimuruina	Guayo												1
142	Ajimuruina	Guayo				1	Unknown (1)				1	Gastroenteritis (1)				3	Febrile Syndrome Unspecified (1) / Gastroenteritis (2)
143	Ajimuruina	Guayo													1
144	Jimuruina	Guayo													1	1	CNS Infection (1)			1
145	Jimuruina	Guayo				1	Unknown (1)
146	Jimuruina	Guayo							1					1
147	Jimuruina	Guayo
148	Jimuruina	Guayo							1					1
154	Batokonoko	Guayo
155	Batokonoko	Guayo							6					2
156	Batokonoko	Guayo				1	Birth Asphyxia - Meconium aspiration (1)		1					3
157	Batokonoko	Guayo
158	Batokonoko	Guayo							1
159	Batokonoko	Guayo
160	Nayara	Guayo
161	Nayara	Guayo							1					1
162	Nayara	Guayo
163	Nayara	Guayo							5
164	Nayara	Guayo												3
165	Nayara	Guayo								1
166	Santa Rosa de Guayo	Guayo													4
167	Santa Rosa de Guayo	Guayo
168	Santa Rosa de Guayo	Guayo							3					1
169	Santa Rosa de Guayo	Guayo									1	Febrile Syndrome Unspecified (1)		2
170	Santa Rosa de Guayo	Guayo
171	Santa Rosa de Guayo	Guayo				1	Preterm Birth - IRDS (1)		1					1
178	Jokabanoko I y II	Guayo
179	Jokabanoko I y II	Guayo
180	Jokabanoko I y II	Guayo													1
181	Jokabanoko I y II	Guayo				1	Unknown (1)				2	Gastroenteritis (2)		1		1	Unknown (1)
182	Jokabanoko I y II	Guayo				1	Unknown (1)		1							2	Febrile Syndrome Unspecified (1) / Gastroenteritis (1)
183	Jokabanoko I y II	Guayo									2	Gastroenteritis (2)			1
184	Moninoko	Guayo		1										1		1	Febrile Syndrome Unspecified (1)
185	Moninoko	Guayo							1					1
186	Moninoko	Guayo
187	Moninoko	Guayo									1	Febrile Syndrome Unspecified (1)
188	Moninoko	Guayo							1					1
189	Moninoko	Guayo									1	Febrile Syndrome Unspecified (1)
190	Tekoburojo	Guayo							2					2
191	Tekoburojo	Guayo
192	Tekoburojo	Guayo								2				3	1				1
193	Tekoburojo	Guayo												2	1
194	Tekoburojo	Guayo							1	1					1
195	Tekoburojo	Guayo							2					2
196	Tekoburojo	Guayo												5
204	Barakataina I y II	Guayo
205	Barakataina I y II	Guayo												1	1
206	Barakataina I y II	Guayo							3					5
207	Barakataina I y II	Guayo
208	Barakataina I y II	Guayo
209	Barakataina I y II	Guayo
210	Barakataina I y II	Guayo								1					1
211	Jokabanoko I y II	Guayo
212	Jokabanoko I y II	Guayo
213	Jokabanoko I y II	Guayo
214	Jokabanoko I y II	Guayo
215	Jokabanoko I y II	Guayo													1
216	Jokabanoko I y II	Guayo												2
217	Jokabanoko I y II	Guayo							5
226	Guayaboroina	Guayo							1
227	Guayaboroina	Guayo
228	Guayaboroina	Guayo				1	Unknown (1)
229	Guayaboroina	Guayo									1	Unknown (1)		1
230	Guayaboroina	Guayo
231	Guayaboroina	Guayo
232	Guayaboroina	Guayo
233	Guayaboroina	Guayo
234	Campo Alegre	Guayo												6
235	Campo Alegre	Guayo												2
236	Campo Alegre	Guayo												4
237	Campo Alegre	Guayo																	1
238	Campo Alegre	Guayo							1
239	Campo Alegre	Guayo							2					2
240	Campo Alegre	Guayo							5					2
241	Campo Alegre	Guayo							1
242	Campo Alegre	Guayo							1
252	La Mora	Guayo							1
253	La Mora	Guayo												2
254	La Mora	Guayo												2
255	La Mora	Guayo												1		1	Gastroenteritis (1)
256	La Mora	Guayo												2
257	La Mora	Guayo												1
258	La Mora	Guayo												3
259	La Mora	Guayo
260	La Mora	Guayo												1
261	La Mora	Guayo									1	Malnutrition (1)
262	Kuamujo	Guayo							1
263	Kuamujo	Guayo												1		1	Febrile Syndrome Unspecified (1)
264	Kuamujo	Guayo							1					1
265	Kuamujo	Guayo												1
266	Kuamujo	Guayo
267	Kuamujo	Guayo				1	Infanticide - Unknown (1)		1					2		2	Gastroenteritis (2)
268	Kuamujo	Guayo
269	Kuamujo	Guayo							1					1
270	Kuamujo	Guayo
271	Kuamujo	Guayo
282	Jerisabanoko	Guayo												3	1				1
283	Jerisabanoko	Guayo				1	Malnutrition (1)
284	Jerisabanoko	Guayo				1	Birth Asphyxia - Meconium aspiration (Multiple Pregnancy - one of the twins) (1)
285	Jerisabanoko	Guayo			1				3
286	Jerisabanoko	Guayo								1	3	Febrile Syndrome Unspecified (1) / Gastroenteritis (2)		1
287	Jerisabanoko	Guayo								2
288	Jerisabanoko	Guayo				1	Birth Asphyxia - Meconium aspiration (1)
289	Jerisabanoko	Guayo
290	Jerisabanoko	Guayo							1
291	Jerisabanoko	Guayo
292	Jerisabanoko	Guayo								1
304	Jobure de Guayo	Guayo
305	Jobure de Guayo	Guayo														1	Gastroenteritis (1)
306	Jobure de Guayo	Guayo				1	Infanticide - Unknown (1)
307	Jobure de Guayo	Guayo												1
308	Jobure de Guayo	Guayo												1		2	Gastroenteritis (2)
309	Jobure de Guayo	Guayo
310	Jobure de Guayo	Guayo
311	Jobure de Guayo	Guayo
312	Jobure de Guayo	Guayo														2	Unknown (2)
313	Jobure de Guayo	Guayo												1
314	Jobure de Guayo	Guayo							1					1
315	Jobure de Guayo	Guayo													1
316	Jobure de Guayo	Guayo							1
317	Merejina	Guayo
318	Merejina	Guayo								1											1	Unknown (1)
319	Merejina	Guayo												1
320	Merejina	Guayo							1	2				3	3
321	Merejina	Guayo								2
322	Merejina	Guayo
323	Merejina	Guayo
324	Merejina	Guayo							6					3
325	Merejina	Guayo				4	Preterm Birth - IRDS (4)			1
326	Merejina	Guayo							1
327	Merejina	Guayo							1					1
328	Merejina	Guayo
329	Merejina	Guayo							2					1
330	Merejina	Guayo
380	Murako	Guayo												1
381	Murako	Guayo
382	Murako	Guayo
383	Murako	Guayo		1
384	Murako	Guayo												8		1	Eruptive Disease (1)
385	Murako	Guayo							2
386	Murako	Guayo
387	Murako	Guayo									3	Witchcraft (3)
388	Murako	Guayo							2
389	Murako	Guayo												2
390	Murako	Guayo												2
391	Murako	Guayo												1
392	Murako	Guayo												1
393	Murako	Guayo
394	Murako	Guayo												1
395	Murako	Guayo		1					1					2
396	Murako	Guayo
397	Murako	Guayo												1
398	Murako	Guayo												1
399	Murako	Guayo							1					2
421	San Francisco de Guayo	Guayo
422	San Francisco de Guayo	Guayo
423	San Francisco de Guayo	Guayo
424	San Francisco de Guayo	Guayo
425	San Francisco de Guayo	Guayo
426	San Francisco de Guayo	Guayo
427	San Francisco de Guayo	Guayo							1		1	Gastroenteritis (1)		1
428	San Francisco de Guayo	Guayo				1	Unknown (1)							1	1
429	San Francisco de Guayo	Guayo			2						1	Snake bite (1)				1	Unknown (1)
430	San Francisco de Guayo	Guayo
431	San Francisco de Guayo	Guayo												1
432	San Francisco de Guayo	Guayo
433	San Francisco de Guayo	Guayo
434	San Francisco de Guayo	Guayo
435	San Francisco de Guayo	Guayo
436	San Francisco de Guayo	Guayo
437	San Francisco de Guayo	Guayo
438	San Francisco de Guayo	Guayo
439	San Francisco de Guayo	Guayo
440	San Francisco de Guayo	Guayo														1	Drowning (1)
441	San Francisco de Guayo	Guayo				1	Upper GI bleeding (1)							2
442	San Francisco de Guayo	Guayo							3					1		1	Gastroenteritis (1)
443	San Francisco de Guayo	Guayo
444	San Francisco de Guayo	Guayo
445	San Francisco de Guayo	Guayo
446	San Francisco de Guayo	Guayo
447	San Francisco de Guayo	Guayo
448	San Francisco de Guayo	Guayo
449	San Francisco de Guayo	Guayo
450	San Francisco de Guayo	Guayo				2	Unknown (2)
451	San Francisco de Guayo	Guayo
452	San Francisco de Guayo	Guayo
453	San Francisco de Guayo	Guayo
454	San Francisco de Guayo	Guayo
455	San Francisco de Guayo	Guayo												1
456	San Francisco de Guayo	Guayo		1										4
457	San Francisco de Guayo	Guayo
458	San Francisco de Guayo	Guayo												1
459	San Francisco de Guayo	Guayo
460	San Francisco de Guayo	Guayo				1	Drowning (1)		3					1		1	Drowning (1)
461	San Francisco de Guayo	Guayo
462	San Francisco de Guayo	Guayo
463	San Francisco de Guayo	Guayo
464	San Francisco de Guayo	Guayo
465	San Francisco de Guayo	Guayo				3	Preterm-Birth (2) / CNS Infection (1)		1	1		Pertussis suspected -IRA (1)				1	Malnutrition (1)
466	San Francisco de Guayo	Guayo
467	San Francisco de Guayo	Guayo
468	San Francisco de Guayo	Guayo
469	San Francisco de Guayo	Guayo
470	San Francisco de Guayo	Guayo
471	San Francisco de Guayo	Guayo				3	Preterm-Birth (2) / Bacterial sepsis of newborn unspecified (1)
472	San Francisco de Guayo	Guayo
473	San Francisco de Guayo	Guayo												3					1
474	San Francisco de Guayo	Guayo				1	Gastroenteritis (1)							1
475	San Francisco de Guayo	Guayo							1					4
476	San Francisco de Guayo	Guayo
477	San Francisco de Guayo	Guayo
478	San Francisco de Guayo	Guayo
479	San Francisco de Guayo	Guayo
480	San Francisco de Guayo	Guayo							1					1		1	Pertussis (1)
481	San Francisco de Guayo	Guayo
482	San Francisco de Guayo	Guayo
483	San Francisco de Guayo	Guayo
484	San Francisco de Guayo	Guayo												1
485	San Francisco de Guayo	Guayo
486	San Francisco de Guayo	Guayo								2				4	2				2
487	San Francisco de Guayo	Guayo									2	Measles (1) / Unknown (1)
488	San Francisco de Guayo	Guayo
489	San Francisco de Guayo	Guayo
490	San Francisco de Guayo	Guayo
491	San Francisco de Guayo	Guayo
492	San Francisco de Guayo	Guayo								2
493	San Francisco de Guayo	Guayo												1
494	San Francisco de Guayo	Guayo												2
495	San Francisco de Guayo	Guayo
496	San Francisco de Guayo	Guayo
497	San Francisco de Guayo	Guayo			2
498	San Francisco de Guayo	Guayo												1
499	San Francisco de Guayo	Guayo
3	Abuenekabanoco	Curiapo				1	Preterm-Birth - IRDS (1)
5	Ildamananoco	Curiapo														2	Gastroenteritis (2)
10	Bocoboco	Curiapo
26	Jotajana II	Curiapo							1					1
27	Jotajana II	Curiapo									2	Measles (2)				2	Measles (2)				1	Measles (1)
28	Jotajana II	Curiapo
32	Boca de Nabakojoida	Curiapo									1	Unknown (1)
33	Boca de Nabakojoida	Curiapo							1		1	Measles (1)				1	Measles (1)
34	Boca de Nabakojoida	Curiapo
38	Nabakojoida	Curiapo								1
39	Nabakojoida	Curiapo								1					1	1	Gastroenteritis (1)
40	Nabakojoida	Curiapo
53	Guayaboroina de Curiapo	Curiapo							1
54	Guayaboroina de Curiapo	Curiapo
55	Guayaboroina de Curiapo	Curiapo							1
63	Nabakojoida	Curiapo
64	Nabakojoida	Curiapo												4
65	Nabakojoida	Curiapo							3					1
66	Nabakojoida	Curiapo
99	Jotajana I	Curiapo
100	Jotajana I	Curiapo												1
101	Jotajana I	Curiapo
102	Jotajana I	Curiapo
103	Jotajana I	Curiapo							2					1
134	Moraina de Curiapo	Curiapo							1
135	Moraina de Curiapo	Curiapo
136	Moraina de Curiapo	Curiapo
137	Moraina de Curiapo	Curiapo
138	Moraina de Curiapo	Curiapo							4
172	Moraina	Curiapo			1
173	Moraina	Curiapo							1					1
174	Moraina	Curiapo							1
175	Moraina	Curiapo												1
176	Moraina	Curiapo								2					2
177	Moraina	Curiapo							1
218	Osibukabinoko	Curiapo									1	Gastroenteritis (1)
219	Osibukabinoko	Curiapo														1	Gastroenteritis (1)				1	Gastroenteritis (1)
220	Osibukabinoko	Curiapo												2
221	Osibukabinoko	Curiapo												3
222	Osibukabinoko	Curiapo									2	Gastroenteritis (2)
223	Osibukabinoko	Curiapo														2	Gastroenteritis (2)
224	Osibukabinoko	Curiapo
225	Osibukabinoko	Curiapo												1
293	Ajotejana	Curiapo
294	Ajotejana	Curiapo
295	Ajotejana	Curiapo												1	1	3	Eruptive Disease (2) / Gastroenteritis (1)
296	Ajotejana	Curiapo
297	Ajotejana	Curiapo
298	Ajotejana	Curiapo
299	Ajotejana	Curiapo									2	Febrile Syndrome Unspecified (2)
300	Ajotejana	Curiapo												1
301	Ajotejana	Curiapo
302	Ajotejana	Curiapo												1
303	Ajotejana	Curiapo								1
362	Curiapo	Curiapo
363	Curiapo	Curiapo												1
364	Curiapo	Curiapo												1
365	Curiapo	Curiapo									1	Malnutrition (1)
366	Curiapo	Curiapo									1	Unknown (1)
367	Curiapo	Curiapo									2	Malnutrition (Twins) (2)							2
368	Curiapo	Curiapo
369	Curiapo	Curiapo
370	Curiapo	Curiapo
371	Curiapo	Curiapo							1
372	Curiapo	Curiapo								1					1	1	CNS Infection (1)				1	Trauma (1)
373	Curiapo	Curiapo							2
374	Curiapo	Curiapo
375	Curiapo	Curiapo							1
376	Curiapo	Curiapo									1	Asthma (1)
377	Curiapo	Curiapo							3	1				1		1	Unspecified Malaria (1)
378	Curiapo	Curiapo												2
379	Curiapo	Curiapo							3	2				1
400	Kaiwire	Curiapo												2
401	Kaiwire	Curiapo									3	Gastroenteritis (3)
402	Kaiwire	Curiapo									2	CNS Infection - Febrile Syndrome Unspecified (2)		1		1	Gastroenteritis (1)
403	Kaiwire	Curiapo				1	Unknown (1)		1		1	Drowning (1)
404	Kaiwire	Curiapo
405	Kaiwire	Curiapo		1
406	Kaiwire	Curiapo
407	Kaiwire	Curiapo							1
408	Kaiwire	Curiapo									4	Gastroenteritis (4)		1		1	Gastroenteritis (1)
409	Kaiwire	Curiapo
410	Kaiwire	Curiapo
411	Kaiwire	Curiapo									1	Gastroenteritis (1)		1		1	Gastroenteritis (1)				1	Malnutrition (1)
412	Kaiwire	Curiapo							1					1
413	Kaiwire	Curiapo				1	Preterm-Birth (1)
414	Kaiwire	Curiapo												1					1
415	Kaiwire	Curiapo								2
416	Kaiwire	Curiapo
417	Kaiwire	Curiapo												5
418	Kaiwire	Curiapo
419	Kaiwire	Curiapo		1					3					1		1	Unknown (1)
420	Kaiwire	Curiapo							1		2	Gastroenteritis (2)				1	Scorpion Sting (1)
4	Jotasanuka	Nabasanuka
11	Barakaro	Nabasanuka							2					5
12	Barakaro	Nabasanuka							2					1
59	Kuarejoro	Nabasanuka								1
60	Kuarejoro	Nabasanuka
61	Kuarejoro	Nabasanuka
62	Kuarejoro	Nabasanuka								1	1	Pertussis (1)		2
67	Mojabaina de Bonoina	Nabasanuka
68	Mojabaina de Bonoina	Nabasanuka
69	Mojabaina de Bonoina	Nabasanuka
70	Mojabaina de Bonoina	Nabasanuka							1							1	Unknown (1)
149	Burojosanuka	Nabasanuka
150	Burojosanuka	Nabasanuka							1	3
151	Burojosanuka	Nabasanuka							2	3					5
152	Burojosanuka	Nabasanuka														6	witchcraft (6)
153	Burojosanuka	Nabasanuka												7
197	Jobasujuru	Nabasanuka							1	1		Pertussis suspected
198	Jobasujuru	Nabasanuka								1
199	Jobasujuru	Nabasanuka
200	Jobasujuru	Nabasanuka							3
201	Jobasujuru	Nabasanuka								1
202	Jobasujuru	Nabasanuka
203	Jobasujuru	Nabasanuka												2
243	Musimurina	Nabasanuka							1					1
244	Musimurina	Nabasanuka							1					2
245	Musimurina	Nabasanuka
246	Musimurina	Nabasanuka							3					1
247	Musimurina	Nabasanuka				2	Unknown (2)		1
248	Musimurina	Nabasanuka				1	Unknown (1)		1		1	Unknown (1)
249	Musimurina	Nabasanuka													1
250	Musimurina	Nabasanuka
251	Musimurina	Nabasanuka
272	Siawani	Nabasanuka				1	Preterm-Birth - IRDS (1)
273	Siawani	Nabasanuka				2	Malnutrition (1) / Preterm-Birth (1)				3	Impetigo (2) / Pertussis (1)
274	Siawani	Nabasanuka									2	witchcraft (2)
275	Siawani	Nabasanuka
276	Siawani	Nabasanuka									2	Spider bite (1) / Ascariasis - Intestinal Obstruction (1)
277	Siawani	Nabasanuka				1	Birth Asphyxia (1)
278	Siawani	Nabasanuka
279	Siawani	Nabasanuka							1
280	Siawani	Nabasanuka												1
281	Siawani	Nabasanuka														1	Congenital Abnormality (1)
331	Nabasanuka	Nabasanuka							1
332	Nabasanuka	Nabasanuka
333	Nabasanuka	Nabasanuka													3
334	Nabasanuka	Nabasanuka												2
335	Nabasanuka	Nabasanuka
336	Nabasanuka	Nabasanuka
337	Nabasanuka	Nabasanuka							1							2	measles (1) / malnutrition (1)
338	Nabasanuka	Nabasanuka									1	Impetigo (1)		1
339	Nabasanuka	Nabasanuka
340	Nabasanuka	Nabasanuka
341	Nabasanuka	Nabasanuka							1
342	Nabasanuka	Nabasanuka								1				1
343	Nabasanuka	Nabasanuka
344	Nabasanuka	Nabasanuka												1
345	Bonoina	Nabasanuka
346	Bonoina	Nabasanuka													1
347	Bonoina	Nabasanuka
348	Bonoina	Nabasanuka
349	Bonoina	Nabasanuka
350	Bonoina	Nabasanuka
351	Bonoina	Nabasanuka
352	Bonoina	Nabasanuka							3
353	Bonoina	Nabasanuka							2					1
354	Bonoina	Nabasanuka
355	Bonoina	Nabasanuka
356	Bonoina	Nabasanuka				2	Unknown (2)
357	Bonoina	Nabasanuka
358	Bonoina	Nabasanuka							5					2
359	Bonoina	Nabasanuka
360	Bonoina	Nabasanuka							1					1
361	Bonoina	Nabasanuka
		TOTAL		15	13	80			337	124	99			367	86	90			14	4	16

## Sheet: Determinants
				Mother's Characteristics			Living in a community without access to						Household Characteristics
Mother's ID	CSI (Child Survival Index)	Municipality	Subregion	Maternal Age	Illiteracy	Parity	Primary School	Primary Healthcare Institution	Water treatment Plant	Medical Doctor	Religious mission	Size of the community (Number of houses)	Profession of the household head: Not teacher or nuse	Total Number of People in House	Father's presence	Traditional Household	MPI	Absence of water treatment practices	Presence of an Outboard Motor	Main Water Source: River water
1	1	PED	PED-Manamo	28	1	1	1	1	1	0	1	2	1	7	1	0	0.5	1	1	0
4	0.2	PED	PED-Manamo	47	1	15	0	0	1	1	1	17	1	7	0	1	0.722222	1	0	0
5	0.6	PED	PED-Manamo	20	1	5	0	0	1	1	1	17	1	5	1	0	0.666667	1	0	0
6	0.714286	PED	PED-Manamo	25	1	7	0	0	1	1	1	17	1	7	1	0	0.555556	1	0	0
11	1	PED	PED-Manamo	23	0	3	1	1	1	1	1	5	1	4	0	0	0.555556	1	0	0
12	0.642857	PED	PED-Manamo	42	1	14	1	1	1	1	1	5	1	8	1	0	0.666667	1	1	0
13	1	PED	PED-Manamo	20	0	3	1	1	1	1	1	5	1	5	1	0	0.555556	1	0	0
14	0.333333	PED	PED-Manamo	24	0	3	1	1	1	1	1	5	1	3	1	0	0.722222	1	0	0
27	0.307692	PED	PED-Manamo	30	1	13	0	1	1	1	1	16	1	3	1	1	0.666667	1	1	0
28	0.875	PED	PED-Manamo	30	1	8	0	1	1	1	1	30	1	9	1	0	0.5	1	1	0
29	1	PED	PED-Manamo	21	1	1	0	1	1	1	1	30	1	5	0	0	0.5	1	1	0
30	0.333333	PED	PED-Manamo	48	1	9	0	1	1	1	1	30	1	5	1	0	0.666667	1	1	0
31	0.4	PED	PED-Manamo	31	1	10	0	1	1	1	1	30	1	6	1	0	0.444444	1	1	0
32	0.5	PED	PED-Manamo	16	0	2	0	1	1	1	1	30	1	3	1	0	0.666667	1	1	0
33	0.5	PED	PED-Manamo	47	0	12	0	1	1	1	1	30	1	8	1	0	0.611111	1	1	0
34	0.5	PED	PED-Manamo	21	1	4	0	1	1	1	1	30	1	4	1	0	0.666667	1	1	0
35	0.8	PED	PED-Manamo	26	1	5	0	1	1	1	1	30	1	8	1	0	0.666667	1	0	0
36	0.875	PED	PED-Manamo	31	1	8	0	1	1	1	1	30	1	9	1	0	0.666667	1	1	0
37	1	PED	PED-Manamo	24	1	4	0	1	1	1	1	30	1	16	1	0	0.333333	1	1	0
38	0.666667	PED	PED-Manamo	26	1	3	0	1	1	1	1	30	1	16	1	0	0.5	1	1	0
39	0.8	PED	PED-Manamo	30	1	5	0	0	1	1	1	24	1	19	0	0	0.666667	1	0	1
40	0.5	PED	PED-Manamo	28	1	12	0	0	1	1	1	24	1	19	1	0	0.666667	1	0	1
41	1	PED	PED-Manamo	17	0	1	0	0	1	1	1	24	1	12	1	0	0.388889	1	0	1
42	1	PED	PED-Manamo	27	0	7	0	0	1	1	1	24	1	9	1	0	0.555556	1	0	0
43	0.857143	PED	PED-Manamo	49	1	14	0	0	1	1	1	24	1	12	1	0	0.5	1	1	1
44	0.5	PED	PED-Manamo	26	1	8	0	0	1	1	1	24	1	8	1	0	0.722222	1	0	1
45	0.6	PED	PED-Manamo	25	1	5	0	0	1	1	1	24	1	5	1	0	0.722222	1	0	0
46	0.666667	PED	PED-Manamo	26	1	3	0	0	1	1	1	24	1	6	1	0	0.611111	1	1	0
47	0.333333	PED	PED-Manamo	43	1	3	0	0	1	1	1	24	1	6	0	0	0.611111	1	1	0
48	0.8	PED	PED-Manamo	26	1	5	0	0	1	1	1	24	1	9	1	0	0.611111	1	1	0
49	0.833333	PED	PED-Manamo	26	1	6	0	0	1	1	1	24	1	9	1	0	0.722222	1	1	0
62	0.6	PED	PED-Manamo	25	1	5	0	1	1	1	1	70	0	5	1	0	0.722222	1	1	0
63	1	PED	PED-Manamo	41	1	10	0	1	1	1	1	70	0	9	1	0	0.277778	1	1	0
64	0.625	PED	PED-Manamo	37	1	8	0	1	1	1	1	70	1	7	1	1	0.777778	1	0	0
65	0.8	PED	PED-Manamo	42	1	10	0	1	1	1	1	70	1	6	1	0	0.666667	1	1	0
66	1	PED	PED-Manamo	25	1	2	0	1	1	1	1	70	1	13	1	0	0.555556	1	1	0
67	1	PED	PED-Manamo	28	1	3	0	1	1	1	1	70	1	13	0	0	0.555556	1	1	0
68	0.7	PED	PED-Manamo	41	1	10	0	1	1	1	1	70	1	13	1	0	0.722222	1	1	0
69	0.555556	PED	PED-Manamo	31	1	9	0	1	1	1	1	70	1	7	1	0	0.5	1	1	0
70	0.538462	PED	PED-Manamo	49	1	13	0	1	1	1	1	70	1	11	1	0	0.722222	1	1	0
71	0.727273	PED	PED-Manamo	69	1	11	0	1	1	1	1	70	1	8	1	0	0.555556	1	1	0
72	0.8	PED	PED-Manamo	32	0	5	0	1	1	1	1	70	1	8	0	0	0.555556	1	1	0
73	1	PED	PED-Manamo	18	1	1	0	1	1	1	1	70	1	10	1	0	0.555556	1	0	0
74	0.666667	PED	PED-Manamo	36	1	9	0	1	1	1	1	70	1	10	1	0	0.722222	1	0	0
75	0.666667	PED	PED-Manamo	74	1	9	0	1	1	1	1	70	1	1	0	1	0.611111	1	0	0
76	0.7	PED	PED-Manamo	59	1	10	0	0	1	0	1	40	1	8	1	0	0.722222	1	0	0
77	0.5	PED	PED-Manamo	31	1	4	0	0	1	0	1	40	1	6	1	0	0.666667	1	0	0
78	1	PED	PED-Manamo	18	0	1	0	0	1	0	1	40	1	13	0	0	0.388889	1	1	0
79	0.666667	PED	PED-Manamo	29	1	3	0	0	1	0	1	40	1	13	1	0	0.722222	1	1	0
80	0.8	PED	PED-Manamo	36	1	10	0	0	1	0	1	40	1	12	1	0	0.777778	1	0	0
81	1	PED	PED-Manamo	19	0	1	0	0	1	0	1	40	1	10	1	0	0.388889	1	0	0
82	0.833333	PED	PED-Manamo	33	0	6	0	0	1	0	1	40	1	12	1	0	0.611111	0	1	0
83	1	PED	PED-Manamo	31	0	4	0	0	1	0	1	40	1	6	1	0	0.333333	1	1	0
84	0.333333	PED	PED-Manamo	39	1	9	0	0	1	0	1	40	1	15	1	0	0.722222	1	1	0
85	0.666667	PED	PED-Manamo	25	0	3	0	0	1	0	1	40	1	15	1	0	0.555556	1	1	0
86	0.5	PED	PED-Manamo	36	1	8	0	0	1	0	1	40	1	15	1	0	0.722222	1	1	0
87	0.5	PED	PED-Manamo	19	0	2	0	0	1	0	1	40	1	15	1	0	0.722222	1	1	0
88	0.75	PED	PED-Manamo	32	0	4	0	0	1	0	1	40	1	5	1	0	0.5	1	0	0
89	1	PED	PED-Manamo	22	1	3	0	0	1	0	1	40	1	5	1	0	0.555556	1	1	0
90	1	PED	PED-Manamo	20	1	2	0	0	1	0	1	40	0	4	1	0	0.555556	1	0	0
91	0.5	PED	PED-Manamo	30	1	4	1	1	1	1	1	12	1	6	1	0	0.666667	1	1	0
92	1	PED	PED-Manamo	31	1	5	1	1	1	1	1	12	1	8	1	0	0.5	1	0	0
93	0.5	PED	PED-Manamo	32	1	4	1	1	1	1	1	12	1	4	1	0	0.666667	1	1	0
94	1	PED	PED-Manamo	23	0	3	1	1	1	1	1	12	1	11	1	1	0.5	1	0	0
95	1	PED	PED-Manamo	19	0	2	0	0	1	1	1	102	1	10	1	0	0.5	1	1	0
96	0.6	PED	PED-Manamo	41	1	10	0	0	1	1	1	102	1	10	1	0	0.666667	1	1	0
97	1	PED	PED-Manamo	38	0	8	0	0	1	1	1	102	1	11	1	0	0.5	1	1	0
98	0.916667	PED	PED-Manamo	43	1	12	0	0	1	1	1	102	1	12	1	0	0.666667	1	1	0
2	1	PED	PED-Waranoko	25	1	8	0	1	1	1	1	7	1	12	1	0	0.5	1	1	0
3	0.5	PED	PED-Waranoko	26	1	4	0	1	1	1	1	7	1	8	1	1	0.722222	1	0	0
7	1	PED	PED-Waranoko	18	1	1	1	1	1	1	1	2	1	20	1	0	0.444444	1	1	1
8	0.545455	PED	PED-Waranoko	41	1	11	1	1	1	1	1	2	1	20	1	0	0.611111	1	1	1
9	1	PED	PED-Waranoko	26	1	3	1	1	1	1	1	2	1	20	1	0	0.444444	1	1	1
10	0.6	PED	PED-Waranoko	24	1	5	1	1	1	1	1	2	1	20	1	0	0.611111	1	1	1
15	0.571429	PED	PED-Waranoko	56	1	7	1	1	1	1	1	12	1	9	1	0	0.722222	1	0	0
16	1	PED	PED-Waranoko	39	1	4	1	1	1	1	1	12	1	6	1	0	0.388889	1	0	0
17	0.5	PED	PED-Waranoko	34	1	8	1	1	1	1	1	12	1	6	1	0	0.666667	1	1	0
18	0.8	PED	PED-Waranoko	28	1	5	1	1	1	1	1	12	1	10	1	0	0.666667	1	1	0
19	1	PED	PED-Waranoko	59	1	7	1	1	1	1	1	12	1	10	1	0	0.5	1	1	0
20	0.636364	PED	PED-Waranoko	57	1	11	0	1	1	1	1	16	1	8	0	0	0.666667	1	0	0
21	0.555556	PED	PED-Waranoko	24	1	9	0	1	1	1	1	16	1	7	1	0	0.666667	1	0	0
22	0.333333	PED	PED-Waranoko	50	1	9	0	1	1	1	1	16	1	9	0	0	0.666667	1	0	0
23	0.833333	PED	PED-Waranoko	22	1	6	0	1	1	1	1	16	1	9	1	0	0.666667	1	0	0
24	0.615385	PED	PED-Waranoko	59	1	13	0	1	1	1	1	16	1	3	1	0	0.555556	1	0	0
25	0.333333	PED	PED-Waranoko	25	1	9	0	1	1	1	1	16	1	5	1	0	0.722222	1	0	0
26	0.428571	PED	PED-Waranoko	48	1	7	0	1	1	1	1	16	1	6	1	0	0.666667	1	0	0
50	0.666667	PED	PED-Waranoko	46	1	12	0	1	1	1	1	35	1	20	1	0	0.666667	1	1	0
51	0.428571	PED	PED-Waranoko	31	1	7	0	1	1	1	1	35	1	20	1	0	0.666667	1	1	0
52	0.0909091	PED	PED-Waranoko	71	1	11	0	1	1	1	1	35	1	5	1	0	0.722222	1	0	0
53	0.5	PED	PED-Waranoko	17	1	2	0	1	1	1	1	35	1	5	1	0	0.722222	1	0	0
54	0.4	PED	PED-Waranoko	31	1	10	0	1	1	1	1	35	1	8	1	0	0.666667	1	1	0
55	0.545455	PED	PED-Waranoko	46	1	11	0	1	1	1	1	35	1	7	1	0	0.666667	1	0	0
56	0.5	PED	PED-Waranoko	25	1	4	0	1	1	1	1	35	1	4	1	0	0.555556	1	0	0
57	1	PED	PED-Waranoko	31	1	7	0	1	1	1	1	35	1	15	1	0	0.333333	1	1	0
58	0.8	PED	PED-Waranoko	30	1	5	0	1	1	1	1	35	1	15	1	0	0.5	1	1	0
59	1	PED	PED-Waranoko	19	1	2	0	1	1	1	1	35	1	10	1	1	0.5	1	0	0
60	0.8	PED	PED-Waranoko	30	1	5	0	1	1	1	1	35	1	17	1	0	0.666667	1	1	0
61	0.6	PED	PED-Waranoko	28	1	5	0	1	1	1	1	35	1	6	1	0	0.666667	1	1	0
1	0.75	TUC	Makareo-Mariusa	38	1	12	1	1	1	1	1	6	1	11	1	0	0.666667	1	1	1
2	0.785714	TUC	Makareo-Mariusa	38	1	14	1	1	1	1	1	5	1	8	1	0	0.666667	1	1	0
4	0.2	TUC	Makareo-Mariusa	34	1	5	1	1	1	1	1	6	1	4	1	1	0.5	1	0	1
5	0.4	TUC	Makareo-Mariusa	55	1	10	1	1	1	1	1	6	1	7	1	1	0.666667	1	0	0
13	0.5	TUC	Makareo-Mariusa	64	1	2	1	1	1	1	1	12	1	24	0	0	0.666667	1	1	0
14	0.533333	TUC	Makareo-Mariusa	40	1	15	1	1	1	1	1	12	1	24	1	0	0.666667	1	1	0
15	0.25	TUC	Makareo-Mariusa	28	1	8	1	1	1	1	1	12	1	24	1	0	0.666667	1	1	0
16	0.5	TUC	Makareo-Mariusa	26	1	8	1	1	1	1	1	12	1	24	1	0	0.666667	1	1	0
17	0.75	TUC	Makareo-Mariusa	25	1	4	1	1	1	1	1	12	1	15	1	1	0.666667	1	1	0
18	0.666667	TUC	Makareo-Mariusa	25	1	3	1	1	1	1	1	12	1	15	1	1	0.666667	1	1	0
19	1	TUC	Makareo-Mariusa	25	1	1	1	1	1	1	1	12	1	10	1	0	0.5	1	1	0
20	1	TUC	Makareo-Mariusa	18	1	2	1	1	1	1	1	12	1	12	1	0	0.5	1	1	0
21	0.714286	TUC	Makareo-Mariusa	40	1	7	1	1	1	1	1	12	1	11	1	1	0.666667	1	1	0
31	1	TUC	Makareo-Mariusa	25	1	4	0	0	1	1	0	38	1	5	1	0	0.5	1	0	0
32	1	TUC	Makareo-Mariusa	29	0	3	0	0	1	1	0	38	1	10	1	0	0.277778	1	0	0
33	0.666667	TUC	Makareo-Mariusa	30	1	6	0	0	1	1	0	38	1	8	1	0	0.666667	1	1	0
34	1	TUC	Makareo-Mariusa	34	1	7	0	0	1	1	0	38	1	9	1	0	0.5	1	1	0
35	0.714286	TUC	Makareo-Mariusa	34	1	7	0	0	1	1	0	38	1	6	1	0	0.722222	1	0	0
36	0	TUC	Makareo-Mariusa	46	1	1	0	0	1	1	0	38	1	2	1	0	0.5	1	0	0
37	0.2	TUC	Makareo-Mariusa	29	1	5	0	0	1	1	0	38	1	11	1	0	0.666667	1	0	0
38	0.2	TUC	Makareo-Mariusa	56	1	5	0	0	1	1	0	38	1	11	1	0	0.666667	1	0	0
39	0.5	TUC	Makareo-Mariusa	52	1	2	0	0	1	1	0	38	1	2	1	0	0.5	1	0	0
40	0.75	TUC	Makareo-Mariusa	33	1	12	0	0	1	1	0	38	1	8	1	0	0.666667	1	0	1
41	0.285714	TUC	Makareo-Mariusa	61	1	14	0	0	1	1	0	38	1	13	0	0	0.666667	1	1	0
42	0.875	TUC	Makareo-Mariusa	37	1	8	0	0	1	1	0	38	1	13	1	0	0.666667	1	1	0
43	1	TUC	Makareo-Mariusa	20	1	1	0	0	1	1	0	38	1	7	1	0	0.5	1	0	0
44	0.666667	TUC	Makareo-Mariusa	25	1	3	0	0	1	1	0	38	1	9	1	0	0.666667	1	1	0
67	1	TUC	Makareo-Mariusa	26	0	3	0	1	1	1	1	30	0	5	1	0	0.555556	1	1	0
68	0	TUC	Makareo-Mariusa	15	1	2	0	1	1	1	1	30	1	14	1	1	0.666667	1	1	1
69	0.2	TUC	Makareo-Mariusa	41	1	10	0	1	1	1	1	30	1	14	1	0	0.666667	1	1	1
70	1	TUC	Makareo-Mariusa	33	1	5	0	1	1	1	1	30	1	14	1	0	0.5	1	1	1
71	0.416667	TUC	Makareo-Mariusa	41	1	12	0	1	1	1	1	30	1	14	1	0	0.666667	1	1	1
72	0.375	TUC	Makareo-Mariusa	37	1	8	0	1	1	1	1	30	1	38	0	0	0.666667	1	1	0
73	0.363636	TUC	Makareo-Mariusa	43	1	11	0	1	1	1	1	30	1	38	1	0	0.666667	1	1	0
74	0.428571	TUC	Makareo-Mariusa	35	1	7	0	1	1	1	1	30	1	38	1	0	0.666667	1	1	0
75	0.666667	TUC	Makareo-Mariusa	58	1	12	0	1	1	1	1	30	1	16	1	0	0.722222	1	1	0
76	0.166667	TUC	Makareo-Mariusa	42	1	12	0	1	1	1	1	30	1	16	1	0	0.722222	1	1	0
77	1	TUC	Makareo-Mariusa	32	0	2	0	1	1	1	1	30	1	16	0	0	0.555556	1	1	0
78	0.5	TUC	Makareo-Mariusa	26	1	4	0	1	1	1	1	30	0	16	1	0	0.722222	1	1	0
79	0.6	TUC	Makareo-Mariusa	30	1	5	0	1	1	1	1	30	1	9	1	0	0.666667	1	1	0
80	0.153846	TUC	Makareo-Mariusa	61	1	13	0	1	1	1	1	30	1	9	1	0	0.666667	1	1	0
81	0.538462	TUC	Makareo-Mariusa	61	1	13	0	1	1	1	1	30	1	9	0	0	0.666667	1	1	0
82	1	TUC	Makareo-Mariusa	35	1	4	0	1	1	1	1	30	1	13	1	0	0.555556	1	1	0
83	0.25	TUC	Makareo-Mariusa	58	1	20	0	1	1	1	1	30	1	13	1	0	0.722222	1	1	0
84	0.75	TUC	Makareo-Mariusa	41	1	4	0	1	1	1	1	30	1	13	1	0	0.722222	1	1	0
85	1	TUC	Makareo-Mariusa	14	1	1	0	1	1	1	1	30	1	9	1	0	0.611111	1	0	0
86	0.5	TUC	Makareo-Mariusa	34	1	12	0	1	1	1	1	30	1	9	1	0	0.777778	1	0	0
87	0	TUC	Makareo-Mariusa	45	1	10	0	1	1	1	1	30	1	8	1	1	0.666667	1	1	0
88	1	TUC	Makareo-Mariusa	20	1	2	0	1	1	1	1	30	1	8	1	0	0.5	1	1	0
89	1	TUC	Makareo-Mariusa	14	1	1	0	1	1	1	1	30	0	14	1	0	0.5	1	1	0
90	1	TUC	Makareo-Mariusa	19	1	2	0	1	1	1	1	30	1	14	1	0	0.5	1	1	0
91	1	TUC	Makareo-Mariusa	19	0	1	0	1	1	1	1	30	1	14	1	0	0.5	1	1	0
6	0.5	TUC	Alto Delta	26	0	2	0	0	1	1	0	34	1	3	0	0	0.666667	1	0	0
7	0.833333	TUC	Alto Delta	35	0	6	0	0	1	1	0	34	1	22	1	0	0.5	1	0	0
8	0.75	TUC	Alto Delta	37	0	8	0	0	1	1	0	34	1	8	1	0	0.666667	1	0	0
9	1	TUC	Alto Delta	29	0	6	0	0	1	1	0	34	1	8	1	0	0.5	1	0	0
10	0.6	TUC	Alto Delta	29	0	5	0	0	1	1	0	34	1	8	1	0	0.5	1	0	0
11	1	TUC	Alto Delta	31	0	5	0	0	1	1	0	34	1	8	1	0	0.611111	1	0	0
12	1	TUC	Alto Delta	28	1	3	0	0	1	1	0	34	1	6	1	0	0.555556	1	0	0
22	0.75	TUC	Alto Delta	51	1	8	0	0	1	0	1	60	1	18	1	0	0.666667	1	1	0
23	1	TUC	Alto Delta	28	1	5	0	0	1	0	1	60	0	18	1	0	0.5	1	1	0
24	0.666667	TUC	Alto Delta	40	0	6	0	0	1	0	1	60	1	6	1	0	0.555556	1	0	0
25	0.8	TUC	Alto Delta	34	0	5	0	0	1	0	1	60	1	6	1	0	0.555556	1	0	0
26	0.7	TUC	Alto Delta	35	1	10	0	0	1	0	1	60	1	16	1	0	0.777778	1	0	0
27	1	TUC	Alto Delta	28	0	5	0	0	1	0	1	60	0	12	1	0	0.555556	1	0	0
28	0.6	TUC	Alto Delta	27	0	5	0	0	1	0	1	60	0	15	1	0	0.777778	1	0	0
29	0.857143	TUC	Alto Delta	46	1	7	0	0	1	0	1	60	0	11	1	0	0.555556	1	0	0
30	0.666667	TUC	Alto Delta	30	0	6	0	0	1	0	1	60	1	5	1	0	0.722222	1	0	0
45	0.8	TUC	Alto Delta	28	0	5	0	1	0	1	1	70	1	6	1	0	0.666667	1	0	1
46	1	TUC	Alto Delta	37	0	2	0	1	0	1	1	70	1	16	1	0	0.611111	0	0	0
47	1	TUC	Alto Delta	19	1	1	0	1	0	1	1	70	1	16	1	0	0.611111	0	0	0
48	0.166667	TUC	Alto Delta	32	0	6	0	1	0	1	1	70	1	16	1	0	0.777778	0	0	0
49	0.571429	TUC	Alto Delta	42	0	7	0	1	0	1	1	70	1	8	1	0	0.722222	0	1	0
50	0.833333	TUC	Alto Delta	29	0	6	0	1	0	1	1	70	1	4	1	0	0.777778	0	0	0
51	1	TUC	Alto Delta	23	0	2	0	1	0	1	1	70	1	4	1	0	0.555556	0	0	0
52	0.777778	TUC	Alto Delta	53	1	9	0	1	0	1	1	70	1	10	1	0	0.722222	0	0	0
53	0.636364	TUC	Alto Delta	40	0	11	0	1	0	1	1	70	1	16	1	0	0.777778	0	0	0
54	0.857143	TUC	Alto Delta	48	1	7	0	1	0	1	1	70	1	7	0	0	0.777778	0	0	0
55	0.75	TUC	Alto Delta	36	1	8	0	1	0	1	1	70	1	11	0	0	0.666667	0	1	0
56	1	TUC	Alto Delta	21	0	2	0	1	0	1	1	70	1	11	1	0	0.555556	0	1	0
57	1	TUC	Alto Delta	23	0	3	0	1	0	1	1	70	1	11	1	0	0.611111	0	0	0
58	1	TUC	Alto Delta	39	1	10	0	1	0	1	1	70	1	12	1	0	0.5	0	1	0
59	0.714286	TUC	Alto Delta	31	0	7	0	1	0	1	1	70	1	9	1	0	0.722222	0	0	0
60	1	TUC	Alto Delta	18	0	1	0	1	0	1	1	70	1	9	1	0	0.5	0	0	0
61	0.5	TUC	Alto Delta	32	1	10	0	1	0	1	1	70	1	7	1	0	0.777778	0	0	0
62	0.833333	TUC	Alto Delta	46	1	6	0	1	0	1	1	70	1	6	1	0	0.777778	0	0	0
63	0.384615	TUC	Alto Delta	42	0	13	0	1	0	1	1	70	1	8	1	0	0.611111	0	0	0
64	1	TUC	Alto Delta	33	0	4	0	1	0	1	1	70	0	7	0	0	0.444444	0	0	0
65	1	TUC	Alto Delta	20	0	1	0	1	0	1	1	70	1	7	0	0	0.388889	0	0	0
66	1	TUC	Alto Delta	26	0	3	0	1	0	1	1	70	1	8	1	0	0.611111	0	0	0
500	0.818182	TUC	Alto Delta	42	0	11	0	1	1	1	1	15	1	3	0	0	0.777778	1	0	1
1	1	AD	Guayo	21	1	4	1	1	1	1	1	3	1	6	1	0	0.555556	1		1
2	1	AD	Guayo	17	1	2	1	1	1	1	1	2	1	15	1	0	0.555556	1		1
6	0.666667	AD	Guayo	23	1	3	1	1	1	1	1	1	1	14	1	0	0.666667	1	1	0
7	0.888889	AD	Guayo	37	0	9	1	1	1	1	1	2	1	9	1	0	0.666667	1	1	1
8	1	AD	Guayo	24	1	2	1	1	1	1	1	1	1	6	0	0	0.5	1	0	1
9	1	AD	Guayo	16	1	1	0	1	1	1	1	23	1	3	1	0	0.5	1	0	1
13	0.75	AD	Guayo	35	1	8	1	1	1	1	1	8	1	9	1	1	0.666667	0	0	1
14	0.888889	AD	Guayo	36	1	9	1	1	1	1	1	8	1	4	1	0	0.666667	1	0	1
15	1	AD	Guayo	43	0	1	1	1	1	1	1	7	1	3	1	0	0.5	1	1	1
16	0	AD	Guayo	23	0	1	1	1	1	1	1	7	1	8	1	0	0.666667	1	0	1
17	0.875	AD	Guayo	31	1	8	1	1	1	1	1	5	1	9	1	1	0.666667	1	1	1
18	1	AD	Guayo	17	0	1	1	1	1	1	1	5	1	4	1	0	0.555556	1	0	0
19	0.333333	AD	Guayo	26	1	3	1	1	1	1	1	2	1	3	1	1	0.666667	1	0	1
20	0.333333	AD	Guayo	48	1	9	1	1	1	1	1	2	1	4	1	0	0.666667	1	0	1
21	0.8	AD	Guayo	31	0	10	1	1	1	1	1	7	1	10	1	0	0.666667	1	1	1
22	0.5	AD	Guayo	26	0	2	1	1	1	1	1	7	1	10	1	0	0.666667	1	1	1
23	0.7	AD	Guayo	51	1	10	1	1	1	1	1	2	1	14	1	0	0.666667	1	0	1
24	0.857143	AD	Guayo	25	1	7	1	1	1	1	1	2	1	14	1	0	0.666667	1	0	1
25	0.833333	AD	Guayo	38	1	6	1	1	1	1	1	2	1	7	1	1	0.666667	1	0	1
29	1	AD	Guayo	36	1	7	1	1	1	1	1	4	1	8	0	0	0.5	1	0	0
30	1	AD	Guayo	20	0	1	1	1	1	1	1	4	1	8	1	0	0.5	1	0	0
31	1	AD	Guayo	41	1	3	1	1	1	1	1	4	1	4	0	1	0.333333	1	0	1
35	0.571429	AD	Guayo	40	1	7	1	1	1	1	1	1	1	11	1	0	0.666667	1	1	1
36	1	AD	Guayo	23	0	2	1	1	1	1	1	1	1	11	0	0	0.5	1	1	1
37	1	AD	Guayo	31	0	1	1	1	1	1	1	1	1	11	1	0	0.5	1	1	1
41	0.5	AD	Guayo	28	1	2	1	0	1	0	0	6	1	11	1	0	0.722222	1	0	1
42	0.625	AD	Guayo	47	1	8	1	0	1	0	0	6	1	11	1	0	0.722222	1	0	1
43	0.75	AD	Guayo	39	1	8	1	0	1	0	0	6	1	8	1	0	0.722222	1	0	0
44	0.6	AD	Guayo	24	1	5	1	1	1	1	1	7	1	4	1	0	0.666667	0	0	0
45	0.5	AD	Guayo	43	1	2	1	1	1	1	1	7	1	3	1	0	0.5	1	1	1
46	0.6	AD	Guayo	46	1	5	1	1	1	1	1	7	1	3	1	0	0.666667	1	0	0
47	1	AD	Guayo	32	1	8	0	1	1	1	1	11	1	10	1	0	0.5	1	1	0
48	1	AD	Guayo	24	1	3	0	1	1	1	1	11	1	5	1	0	0.5	1	1	1
49	0.916667	AD	Guayo	46	1	12	0	1	1	1	1	11	1	11	1	0	0.666667	1	1	1
50	0.8	AD	Guayo	23	1	5	0	1	1	1	1	5	1	8	1	0	0.666667	1	1	1
51	0.384615	AD	Guayo	53	0	13	0	1	1	1	1	5	1	8	1	0	0.666667	1	0	1
52	0.666667	AD	Guayo	27	1	6	0	1	1	1	1	5	1	6	1	1	0.666667	1	1	1
56	0.666667	AD	Guayo	24	1	3	1	1	1	1	1	5	1	4	1	0	0.666667	1	0	1
57	0.5	AD	Guayo	37	0	12	1	1	1	1	1	5	1	6	1	0	0.666667	1	0	1
58	0.428571	AD	Guayo	32	1	7	1	1	1	1	1	5	1	4	1	0	0.666667	1	0	1
71	0.5	AD	Guayo	37	1	10	1	1	1	1	1	10	1	6	0	1	0.666667	1	0	1
72	1	AD	Guayo	29	1	7	1	1	1	1	1	10	1	10	1	1	0.5	1	0	1
73	0.571429	AD	Guayo	57	0	7	1	1	1	1	1	10	1	6	0	1	0.666667	1	0	1
74	0.692308	AD	Guayo	43	1	13	1	1	1	1	1	10	1	12	1	1	0.722222	1	0	1
75	0.428571	AD	Guayo	51	1	14	1	1	1	1	1	9	1	12	1	0	0.666667	1	0	1
76	0.666667	AD	Guayo	17	1	3	1	1	1	1	1	9	1	4	1	0	0.722222	1	0	1
77	1	AD	Guayo	15	0	1	1	1	1	1	1	9	1	8	0	0	0.5	1	0	1
78	0.833333	AD	Guayo	31	1	6	1	1	1	1	1	9	1	8	1	0	0.666667	1	0	1
79	1	AD	Guayo	18	0	1	0	1	1	1	1	6	1	3	1	0	0.5	1	0	1
80	0.5	AD	Guayo	29	0	6	0	1	1	1	1	6	1	8	1	0	0.666667	1	0	0
81	0.857143	AD	Guayo	47	0	7	0	1	1	1	1	6	0	10	0	0	0.5	1	0	1
82	0.8	AD	Guayo	34	0	5	0	1	1	1	1	6	1	5	1	0	0.5	1	0	0
83	0.222222	AD	Guayo	22	1	9	1	1	1	1	1	2	1	15	1	0	0.666667	1	1	1
84	0.666667	AD	Guayo	45	1	9	1	1	1	1	1	2	1	15	1	0	0.666667	1	1	1
85	0.75	AD	Guayo	23	1	4	1	1	1	1	1	2	1	15	1	0	0.666667	1	1	1
86	0.75	AD	Guayo	20	1	4	1	1	1	1	1	2	1	15	1	0	0.666667	1	1	1
87	0.333333	AD	Guayo	33	1	6	1	1	1	1	1	2	1	5	1	0	0.666667	1	0	1
88	0.5	AD	Guayo	25	1	2	1	1	1	1	1	2	1	3	1	0	0.666667	1	0	1
89	0.6	AD	Guayo	34	1	5	1	1	1	1	1	2	1	4	1	0	0.666667	1	0	1
90	0.428571	AD	Guayo	39	0	7	1	1	1	1	1	2	1	5	1	0	0.666667	1	1	1
91	0.555556	AD	Guayo	58	1	9	1	1	0	1	1	7	1	8	0	0	0.444444	0	0	0
92	0.4	AD	Guayo	34	0	5	1	1	0	1	1	7	1	4	1	0	0.666667	1	0	0
93	1	AD	Guayo	22	1	1	1	1	0	1	1	7	1	8	1	0	0.277778	0	0	0
94	1	AD	Guayo	19	0	2	1	1	0	1	1	7	1	5	1	0	0.277778	0	0	0
95	1	AD	Guayo	17	1	1	1	1	1	1	1	6	1	6	1	0	0.5	1	0	1
96	1	AD	Guayo	20	1	1	1	1	1	1	1	6	1	6	1	0	0.5	1	0	1
97	0.545455	AD	Guayo	35	1	11	1	1	1	1	1	6	1	7	1	1	0.666667	1	1	1
98	0.666667	AD	Guayo	30	1	6	1	1	1	1	1	6	1	6	1	1	0.666667	1	1	1
104	1	AD	Guayo	52	1	11	1	1	1	1	1	10	1	6	1	1	0.555556	1	0	1
105	0.333333	AD	Guayo	29	1	6	1	1	1	1	1	10	1	6	1	1	0.722222	1	0	1
106	0.555556	AD	Guayo	39	1	9	1	1	1	1	1	10	1	13	1	0	0.666667	1	0	1
107	0.714286	AD	Guayo	27	1	7	1	1	1	1	1	10	1	13	1	0	0.666667	1	0	1
108	1	AD	Guayo	31	1	8	1	1	1	1	1	10	1	8	1	0	0.5	1	0	1
109	0.333333	AD	Guayo	29	0	3	1	1	0	1	1	7	1	4	1	0	0.333333	1	0	0
110	1	AD	Guayo	24	1	4	1	1	0	1	1	7	1	12	1	0	0.5	1	0	0
111	0.833333	AD	Guayo	31	1	6	1	1	0	1	1	7	1	12	1	0	0.666667	1	0	0
112	0.666667	AD	Guayo	28	1	6	1	1	0	1	1	7	1	7	1	0	0.611111	0	0	0
113	0.5	AD	Guayo	66	1	6	1	1	0	1	1	7	1	4	1	0	0.5	1	1	0
114	0.666667	AD	Guayo	41	1	9	1	1	1	1	1	8	1	11	1	0	0.666667	1	0	1
115	1	AD	Guayo	25	1	4	1	1	1	1	1	8	1	11	0	0	0.5	1	0	1
116	1	AD	Guayo	17	0	2	1	1	1	1	1	8	1	4	1	0	0.5	1	0	1
117	1	AD	Guayo	25	1	1	1	1	1	1	1	8	1	6	1	0	0.333333	0	0	1
118	0.75	AD	Guayo	51	0	4	1	1	1	1	1	8	1	6	1	0	0.5	1	0	1
119	0.333333	AD	Guayo	46	0	9	1	1	1	1	1	8	1	5	1	0	0.5	1	0	1
120	1	AD	Guayo	23	1	1	1	1	1	1	1	8	1	12	0	0	0.333333	1	0	1
121	0.769231	AD	Guayo	39	0	13	1	1	1	1	1	8	1	12	1	0	0.5	1	0	1
122	0.75	AD	Guayo	26	1	4	1	1	1	1	1	8	1	8	1	0	0.666667	1	0	1
123	1	AD	Guayo	42	1	2	1	1	1	1	1	8	1	8	1	0	0.5	1	0	1
124	0.8	AD	Guayo	22	1	5	1	1	1	1	1	8	1	6	1	0	0.722222	1	0	1
125	0.833333	AD	Guayo	34	1	6	1	1	1	1	1	8	1	11	1	0	0.666667	0	1	1
126	1	AD	Guayo	20	0	3	1	1	1	1	1	8	1	11	0	0	0.5	0	1	1
127	0.4	AD	Guayo	45	1	10	1	1	1	1	1	8	1	11	1	0	0.666667	0	1	1
128	0.857143	AD	Guayo	43	1	7	1	1	1	1	1	8	1	4	0	0	0.666667	1	0	1
129	0.8	AD	Guayo	29	0	5	0	1	1	1	1	21	1	8	1	0	0.666667	1	0	1
130	0.5	AD	Guayo	33	0	6	0	1	1	1	1	21	1	8	1	0	0.5	1	1	1
131	0.75	AD	Guayo	36	0	8	0	1	1	1	1	21	1	5	1	0	0.444444	1	1	1
132	0.6	AD	Guayo	34	0	5	0	1	1	1	1	21	1	5	1	0	0.666667	1	0	1
133	1	AD	Guayo	22	0	4	0	1	1	1	1	21	1	6	1	0	0.5	1	0	1
139	1	AD	Guayo	20	1	1	1	1	1	1	1	15	1	3	1	0	0.5	1	0	1
140	0.714286	AD	Guayo	31	1	7	1	1	1	1	1	15	1	7	1	0	0.666667	1	0	1
141	0.666667	AD	Guayo	28	0	3	1	1	1	1	1	15	1	4	1	0	0.666667	1	0	1
142	0.5	AD	Guayo	48	1	10	1	1	1	1	1	15	1	7	1	0	0.666667	1	0	1
143	0.75	AD	Guayo	26	1	4	1	1	1	1	1	15	1	5	1	0	0.666667	1	0	1
144	0.7	AD	Guayo	61	1	10	1	1	1	1	1	6	1	7	1	0	0.666667	1	1	1
145	0.833333	AD	Guayo	42	1	6	1	1	1	1	1	6	1	9	1	0	0.666667	1	0	1
146	0.777778	AD	Guayo	32	1	9	1	1	1	1	1	6	1	8	1	0	0.666667	1	0	1
147	1	AD	Guayo	17	0	1	1	1	1	1	1	6	1	7	1	0	0.5	0	0	0
148	0.666667	AD	Guayo	28	1	6	1	1	1	1	1	6	1	6	1	0	0.666667	0	0	1
154	1	AD	Guayo	29	0	3	1	1	1	1	1	17	1	14	0	0	0.333333	1	1	1
155	0.384615	AD	Guayo	76	1	13	1	1	1	1	1	17	1	14	0	0	0.666667	1	1	1
156	0.615385	AD	Guayo	50	1	13	1	1	1	1	1	17	1	14	1	0	0.666667	1	1	1
157	0	AD	Guayo	30	0	0	1	1	1	1	1	17	1	14	1	0	0.5	1	1	1
158	0.857143	AD	Guayo	35	0	7	1	1	1	1	1	17	1	9	1	0	0.666667	0	1	1
159	1	AD	Guayo	15	0	1	1	1	1	1	1	17	1	9	0	0	0.333333	0	1	1
160	1	AD	Guayo	25	0	4	1	1	1	1	1	5	1	6	1	0	0.333333	1	1	1
161	0.777778	AD	Guayo	64	0	9	1	1	1	1	1	5	1	6	0	0	0.666667	1	1	1
162	1	AD	Guayo	38	1	9	1	1	1	1	1	5	1	8	1	0	0.333333	1	0	1
163	0.5	AD	Guayo	32	1	10	1	1	1	1	1	5	1	7	1	1	0.666667	1	0	1
164	0.769231	AD	Guayo	31	1	13	1	1	1	1	1	5	1	16	1	0	0.666667	1	0	1
165	0.8	AD	Guayo	25	1	5	1	1	1	1	1	5	1	16	1	1	0.666667	1	0	1
166	0.636364	AD	Guayo	40	0	11	0	1	0	1	1	22	1	5	1	1	0.611111	0	1	0
167	1	AD	Guayo	21	0	1	0	1	0	1	1	22	1	15	0	0	0.333333	0	1	1
168	0.428571	AD	Guayo	29	0	7	0	1	0	1	1	22	1	5	1	0	0.611111	0	0	0
169	0.7	AD	Guayo	41	0	10	0	1	0	1	1	22	1	8	1	1	0.611111	0	1	0
170	1	AD	Guayo	26	0	4	0	1	0	1	1	22	1	6	1	0	0.444444	0	0	0
171	0.5	AD	Guayo	35	0	6	0	1	0	1	1	22	1	5	1	1	0.611111	0		0
178	1	AD	Guayo	32	0	5	0	1	0	1	1	26	1	6	1	0	0.5	1	1	0
179	1	AD	Guayo	33	1	5	0	1	0	1	1	26	1	7	1	1	0.5	1	0	0
180	0.75	AD	Guayo	30	1	4	0	1	0	1	1	26	1	9	1	0	0.666667	1	1	0
181	0.5	AD	Guayo	48	0	10	0	1	0	1	1	26	1	3	1	0	0.666667	1	1	0
182	0.555556	AD	Guayo	36	0	9	0	1	0	1	1	26	1	7	1	0	0.666667	1	0	0
183	0.75	AD	Guayo	63	1	12	0	1	0	1	1	26	1	6	1	0	0.5	1	1	0
184	0.25	AD	Guayo	48	0	4	1	1	1	1	1	11	1	3	1	0	0.666667	1	0	1
185	0.5	AD	Guayo	33	1	4	1	1	1	1	1	11	1	4	1	1	0.666667	1	0	0
186	1	AD	Guayo	26	0	1	1	1	1	1	1	11	1	11	0	0	0.333333	1	0	1
187	0.916667	AD	Guayo	45	0	12	1	1	1	1	1	11	1	11	1	0	0.666667	1	0	1
188	0.75	AD	Guayo	36	1	8	1	1	1	1	1	11	1	8	1	0	0.666667	1	0	1
189	0.75	AD	Guayo	27	0	4	1	1	1	1	1	11	1	7	1	0	0.666667	1	1	1
190	0.333333	AD	Guayo	27	0	6	0	1	1	1	1	15	1	4	1	0	0.666667	1	0	1
191	1	AD	Guayo	22	1	3	0	1	1	1	1	15	1	7	1	1	0.5	1	0	1
192	0.416667	AD	Guayo	56	1	12	0	1	1	1	1	15	1	11	1	1	0.722222	1	0	1
193	0.4	AD	Guayo	25	1	5	0	1	1	1	1	15	1	18	1	1	0.611111	0	0	0
194	0.5	AD	Guayo	63	1	6	0	1	1	1	1	15	1	18	1	1	0.611111	0	0	0
195	0.6	AD	Guayo	46	1	10	0	1	1	1	1	15	1	18	1	1	0.666667	1	0	0
196	0.583333	AD	Guayo	35	0	12	0	1	1	1	1	15	1	12	1	0	0.666667	0	0	0
204	1	AD	Guayo	22	0	2	0	1	1	1	1	21	1	3	1	0	0.444444	0	0	0
205	0.75	AD	Guayo	34	0	8	0	1	1	1	1	21	1	5	1	0	0.611111	0	0	0
206	0.2	AD	Guayo	55	1	10	0	1	1	1	1	21	1	5	1	0	0.5	1	0	0
207	1	AD	Guayo	19	0	2	0	1	1	1	1	21	1	4	1	0	0.444444	0	0	0
208	1	AD	Guayo	37	0	7	0	1	1	1	1	21	1	8	1	0	0.333333	1	0	0
209	1	AD	Guayo	38	1	7	0	1	1	1	1	21	1	9	1	0	0.444444	0	1	0
210	0.75	AD	Guayo	36	0	8	0	1	1	1	1	21	1	8	1	0	0.666667	1	0	0
211	1	AD	Guayo	19	0	2	0	1	0	1	1	26	1	12	1	0	0.5	1	0	0
212	1	AD	Guayo	61	1	7	0	1	0	1	1	26	1	12	1	0	0.5	1	0	0
213	1	AD	Guayo	25	0	3	0	1	0	1	1	26	1	12	1	0	0.333333	1	0	0
214	1	AD	Guayo	69	1	5	0	1	0	1	1	26	1	12	0	0	0.5	1	0	0
215	0.75	AD	Guayo	28	0	4	0	1	0	1	1	26	1	7	1	0	0.666667	1	0	0
216	0.777778	AD	Guayo	32	0	9	0	1	0	1	1	26	1	17	1	0	0.666667	1	0	0
217	0.5	AD	Guayo	43	1	10	0	1	0	1	1	26	1	17	1	0	0.666667	1	0	0
226	0.8	AD	Guayo	32	0	5	0	1	1	1	1	22	1	5	1	0	0.722222	1	0	1
227	1	AD	Guayo	26	0	2	0	1	1	1	1	22	1	4	1	0	0.388889	1	0	1
228	0.5	AD	Guayo	25	0	2	0	1	1	1	1	22	1	5	1	0	0.5	1	0	1
229	0.6	AD	Guayo	43	1	5	0	1	1	1	1	22	1	3	1	0	0.5	1	0	0
230	1	AD	Guayo	33	0	6	0	1	1	1	1	22	1	8	1	0	0.277778	0	1	1
231	1	AD	Guayo	25	0	2	0	1	1	1	1	22	1	4	1	0	0.444444	1	1	1
232	1	AD	Guayo	18	0	2	0	1	1	1	1	22	1	8	1	0	0.444444	1	0	1
233	1	AD	Guayo	18	0	1	0	1	1	1	1	22	1	7	0	0	0.5	1	0	1
234	0.333333	AD	Guayo	63	1	9	1	1	1	1	1	8	1	6	1	0	0.666667	1	0	1
235	0.5	AD	Guayo	29	1	4	1	1	1	1	1	8	1	6	1	0	0.666667	1	0	1
236	0.555556	AD	Guayo	46	1	9	1	1	1	1	1	8	1	7	1	1	0.666667	1	1	0
237	0	AD	Guayo	38	1	1	1	1	1	1	1	8	1	7	1	0	0.666667	1	1	0
238	0.666667	AD	Guayo	19	1	3	1	1	1	1	1	8	1	4	1	1	0.722222	1	0	0
239	0.555556	AD	Guayo	31	1	9	1	1	1	1	1	8	1	5	1	1	0.666667	1	0	1
240	0.3	AD	Guayo	60	1	10	1	1	1	1	1	8	1	5	0	1	0.666667	1	0	1
241	0.666667	AD	Guayo	25	1	3	1	1	1	1	1	8	1	5	1	1	0.666667	1	0	1
242	0.5	AD	Guayo	26	1	2	1	1	1	1	1	8	1	3	1	1	0.666667	1	0	1
252	0.5	AD	Guayo	29	1	2	0	1	1	1	1	25	1	12	1	0	0.722222	1	0	1
253	0.5	AD	Guayo	52	1	4	0	1	1	1	1	25	1	4	1	0	0.611111	0	0	1
254	0.333333	AD	Guayo	25	1	3	0	1	1	1	1	25	1	3	1	0	0.722222	1	0	1
255	0.714286	AD	Guayo	35	1	7	0	1	1	1	1	25	1	7	1	0	0.722222	1	0	1
256	0.6	AD	Guayo	25	1	5	0	1	1	1	1	25	1	6	1	0	0.722222	0	0	1
257	0.75	AD	Guayo	27	1	4	0	1	1	1	1	25	1	12	1	0	0.722222	1	0	1
258	0.4	AD	Guayo	56	1	5	0	1	1	1	1	25	1	12	1	0	0.722222	1	0	1
259	1	AD	Guayo	28	1	3	0	1	1	1	1	25	1	8	1	0	0.5	1	0	1
260	0.666667	AD	Guayo	36	1	3	0	1	1	1	1	25	1	4	1	0	0.722222	1	0	1
261	0.75	AD	Guayo	26	0	4	0	1	1	1	1	25	1	5	1	0	0.722222	0	0	1
262	0.5	AD	Guayo	23	1	2	1	1	1	1	1	30	1	8	1	0	0.722222	1	0	1
263	0.6	AD	Guayo	25	0	5	1	1	1	1	1	30	1	8	1	0	0.722222	1	0	1
264	0.5	AD	Guayo	26	0	4	1	1	1	1	1	30	1	4	1	0	0.777778	1	0	1
265	0.833333	AD	Guayo	35	0	6	1	1	1	1	1	30	1	7	1	0	0.722222	1	0	1
266	1	AD	Guayo	19	0	1	1	1	1	1	1	30	1	3	1	0	0.611111	1	0	1
267	0.333333	AD	Guayo	30	1	9	1	1	1	1	1	30	1	5	1	0	0.722222	1	0	1
268	1	AD	Guayo	22	0	1	1	1	1	1	1	30	1	4	1	0	0.555556	1	0	1
269	0.777778	AD	Guayo	31	1	9	1	1	1	1	1	30	1	5	1	0	0.722222	1	0	1
270	1	AD	Guayo	29	0	6	1	1	1	1	1	30	1	10	1	0	0.611111	1	0	0
271	1	AD	Guayo	19	0	2	1	1	1	1	1	30	1	7	1	0	0.611111	1	0	1
282	0.5	AD	Guayo	32	1	10	0	1	1	1	1	45	1	3	1	0	0.444444	1	0	1
283	0.857143	AD	Guayo	66	1	7	0	1	1	1	1	45	1	6	1	0	0.444444	1	0	1
284	0.857143	AD	Guayo	38	0	7	0	1	1	1	1	45	1	7	1	0	0.5	1	1	1
285	0.555556	AD	Guayo	41	0	9	0	1	1	1	1	45	1	7	1	0	0.666667	1	0	1
286	0.444444	AD	Guayo	53	0	9	0	1	1	1	1	45	1	3	1	0	0.5	1	0	1
287	0.6	AD	Guayo	24	0	5	0	1	1	1	1	45	1	5	1	0	0.666667	1	0	1
288	0.888889	AD	Guayo	38	1	9	0	1	1	1	1	45	1	10	1	0	0.666667	1	1	1
289	1	AD	Guayo	20	0	1	0	1	1	1	1	45	1	5	0	0	0.5	1	0	1
290	0.75	AD	Guayo	22	0	4	0	1	1	1	1	45	1	5	1	0	0.666667	1	0	1
291	1	AD	Guayo	20	0	1	0	1	1	1	1	45	1	4	1	1	0.5	1	0	1
292	0.75	AD	Guayo	26	0	4	0	1	1	1	1	45	0	16	1	0	0.666667	1	0	1
304	1	AD	Guayo	26	0	1	0	1	1	1	1	40	1	15	1	0	0.277778	1	1	0
305	0	AD	Guayo	22	0	1	0	1	1	1	1	40	1	5	0	0	0.555556	1	0	1
306	0.666667	AD	Guayo	30	1	3	0	1	1	1	1	40	1	4	1	0	0.722222	1	0	0
307	0.8	AD	Guayo	28	1	5	0	1	1	1	1	40	1	15	1	0	0.611111	1	1	0
308	0.4	AD	Guayo	36	0	5	0	1	1	1	1	40	1	12	1	0	0.611111	1	1	0
309	1	AD	Guayo	24	0	1	0	1	1	1	1	40	1	16	1	0	0.555556	1	1	0
310	1	AD	Guayo	24	0	2	0	1	1	1	1	40	1	16	0	0	0.555556	1	0	0
311	1	AD	Guayo	26	0	2	0	1	1	1	1	40	1	7	0	0	0.388889	1	1	1
312	0.333333	AD	Guayo	27	0	3	0	1	1	1	1	40	1	11	1	0	0.555556	1	0	1
313	0.5	AD	Guayo	25	0	2	0	1	1	1	1	40	1	6	1	0	0.722222	1	0	1
314	0.666667	AD	Guayo	42	1	6	0	1	1	1	1	40	1	7	1	0	0.777778	1	0	1
315	0.666667	AD	Guayo	23	0	3	0	1	1	1	1	40	1	4	1	0	0.555556	1	0	1
316	0.75	AD	Guayo	41	1	4	0	1	1	1	1	40	1	11	1	0	0.722222	1	0	1
317	1	AD	Guayo	21	0	1	0	0	1	1	0	49	1	5	1	0	0.5	0	1	1
318	0.8	AD	Guayo	59	1	10	0	0	1	1	0	49	1	5	1	0	0.666667	0	1	1
319	0.9	AD	Guayo	36	0	10	0	0	1	1	0	49	1	11	1	0	0.333333	0	0	0
320	0.357143	AD	Guayo	50	1	14	0	0	1	1	0	49	1	8	1	0	0.666667	1	0	0
321	0.666667	AD	Guayo	29	0	6	0	0	1	1	0	49	1	6	1	0	0.666667	1	0	1
322	1	AD	Guayo	34	1	5	0	0	1	1	0	49	1	7	1	0	0.5	1	0	1
323	1	AD	Guayo	31	1	4	0	0	1	1	0	49	1	6	1	0	0.5	1	0	1
324	0.181818	AD	Guayo	45	1	11	0	0	1	1	0	49	1	5	1	0	0.666667	1	0	1
325	0.166667	AD	Guayo	30	1	6	0	0	1	1	0	49	1	4	1	0	0.666667	0	1	1
326	0	AD	Guayo	33	0	1	0	0	1	1	0	49	1	2	1	0	0.444444	1	1	1
327	0.714286	AD	Guayo	36	1	7	0	0	1	1	0	49	1	8	1	0	0.666667	0	0	1
328	1	AD	Guayo	23	0	1	0	0	1	1	0	49	1	5	1	0	0.5	1	0	1
329	0.625	AD	Guayo	33	1	8	0	0	1	1	0	49	1	7	1	0	0.666667	1	0	1
330	1	AD	Guayo	30	1	5	0	0	1	1	0	49	1	9	0	0	0.5	1	1	1
380	0.5	AD	Guayo	24	0	2	0	1	1	1	1	65	1	19	0	0	0.611111	0	0	0
381	1	AD	Guayo	31	0	4	0	1	1	1	1	65	1	19	1	0	0.444444	0	0	0
382	1	AD	Guayo	18	0	2	0	1	1	1	1	65	0	23	1	0	0.333333	0	0	0
383	0.833333	AD	Guayo	26	0	6	0	1	1	1	1	65	1	23	1	0	0.666667	0	0	0
384	0.25	AD	Guayo	43	1	12	0	1	1	1	1	65	1	23	1	0	0.666667	0	0	0
385	0.333333	AD	Guayo	19	0	3	0	1	1	1	1	65	1	19	1	0	0.5	0	0	0
386	1	AD	Guayo	27	0	5	0	1	1	1	1	65	1	19	1	0	0.333333	0	0	0
387	0.25	AD	Guayo	24	0	4	0	1	1	1	1	65	1	9	1	0	0.5	0	0	0
388	0.6	AD	Guayo	22	1	5	0	1	1	1	1	65	1	16	1	0	0.666667	0	0	0
389	0.666667	AD	Guayo	41	0	6	0	1	1	1	1	65	1	8	1	0	0.666667	0	0	0
390	0.6	AD	Guayo	25	1	5	0	1	1	1	1	65	1	11	1	1	0.722222	0	1	1
391	0.75	AD	Guayo	27	0	4	0	1	1	1	1	65	1	8	1	0	0.666667	0	0	0
392	0.833333	AD	Guayo	27	1	6	0	1	1	1	1	65	1	5	0	0	0.666667	0	0	0
393	1	AD	Guayo	19	0	1	0	1	1	1	1	65	1	6	0	0	0.333333	0	0	0
394	0.75	AD	Guayo	26	0	4	0	1	1	1	1	65	1	5	1	1	0.666667	0	0	0
395	0.2	AD	Guayo	26	0	5	0	1	1	1	1	65	1	7	1	0	0.666667	0	1	0
396	1	AD	Guayo	15	0	2	0	1	1	1	1	65	1	6	1	0	0.333333	0	0	0
397	0.5	AD	Guayo	20	0	2	0	1	1	1	1	65	1	3	1	0	0.722222	0	0	0
398	0.75	AD	Guayo	26	0	4	0	1	1	1	1	65	1	11	1	0	0.5	0	0	0
399	0.25	AD	Guayo	25	1	4	0	1	1	1	1	65	1	3	1	1	0.722222	0		0
421	1	AD	Guayo	27	0	4	0	0	1	0	0	111	1	14	0	0	0.444444	1	0	0
422	1	AD	Guayo	29	1	3	0	0	1	0	0	111	1	5	1	0	0.555556	1	0	1
423	1	AD	Guayo	29	0	7	0	0	1	0	0	111	1	10	1	0	0.444444	1	1	1
424	1	AD	Guayo	20	0	2	0	0	1	0	0	111	1	7	0	0	0.5	1	0	1
425	1	AD	Guayo	24	0	1	0	0	1	0	0	111	1	3	1	0	0.444444	1	0	1
426	1	AD	Guayo	28	0	5	0	0	1	0	0	111	1	7	1	0	0.611111	1	0	1
427	0.666667	AD	Guayo	47	0	9	0	0	1	0	0	111	1	6	1	0	0.555556	1	0	0
428	0.727273	AD	Guayo	54	0	11	0	0	1	0	0	111	1	10	1	0	0.5	1	0	0
429	0.428571	AD	Guayo	86	1	7	0	0	1	0	0	111	1	10	0	0	0.5	1	0	0
430	1	AD	Guayo	25	0	2	0	0	1	0	0	111	0	10	1	0	0.166667	1	0	0
431	0.857143	AD	Guayo	40	0	7	0	0	1	0	0	111	0	8	1	0	0.611111	1	1	0
432	1	AD	Guayo	40	0	6	0	0	1	0	0	111	0	5	0	0	0.277778	0	1	0
433	1	AD	Guayo	43	0	5	0	0	1	0	0	111	1	7	1	0	0.277778	1	0	0
434	1	AD	Guayo	23	0	1	0	0	1	0	0	111	0	9	0	0	0.277778	1	1	0
435	1	AD	Guayo	25	0	1	0	0	1	0	0	111	1	9	1	0	0.277778	1	1	0
436	1	AD	Guayo	30	0	1	0	0	1	0	0	111	0	14	0	0	0.444444	1	0	0
437	1	AD	Guayo	28	0	3	0	0	1	0	0	111	1	12	1	0	0.388889	0	0	0
438	1	AD	Guayo	24	0	4	0	0	1	0	0	111	1	6	1	0	0.388889	0	0	0
439	1	AD	Guayo	50	0	4	0	0	1	0	0	111	1	9	1	0	0.277778	1	1	0
440	0.666667	AD	Guayo	25	0	3	0	0	1	0	0	111	1	24	1	0	0.5	1	0	1
441	0.25	AD	Guayo	24	1	4	0	0	1	0	0	111	1	24	1	0	0.666667	1	0	1
442	0.545455	AD	Guayo	55	1	11	0	0	1	0	0	111	1	12	0	0	0.666667	1	0	0
443	1	AD	Guayo	28	1	5	0	0	1	0	0	111	1	12	0	0	0.5	1	0	0
444	0	AD	Guayo	60	0	0	0	0	1	0	0	111	1	10	0	0	0.611111	1	0	0
445	1	AD	Guayo	21	0	1	0	0	1	0	0	111	1	10	0	0	0.444444	1	0	0
446	1	AD	Guayo	31	0	3	0	0	1	0	0	111	1	10	1	0	0.444444	1	0	0
447	1	AD	Guayo	24	0	2	0	0	1	0	0	111	1	12	1	0	0.333333	1	1	0
448	1	AD	Guayo	56	0	5	0	0	1	0	0	111	0	12	1	0	0.333333	1	1	0
449	1	AD	Guayo	25	0	3	0	0	1	0	0	111	0	13	1	0	0.388889	1	1	0
450	0.6	AD	Guayo	56	0	5	0	0	1	0	0	111	1	13	1	0	0.722222	1	1	0
451	1	AD	Guayo	35	0	3	0	0	1	0	0	111	1	13	0	0	0.388889	1	1	0
452	1	AD	Guayo	25	0	1	0	0	1	0	0	111	0	14	1	0	0.388889	1	0	1
453	1	AD	Guayo	33	0	3	0	0	1	0	0	111	0	14	1	0	0.555556	1	0	1
454	1	AD	Guayo	66	0	10	0	0	1	0	0	111	1	14	1	0	0.555556	1	0	1
455	0.5	AD	Guayo	66	1	2	0	0	1	0	0	111	1	7	0	0	0.666667	1	1	0
456	0.444444	AD	Guayo	50	1	9	0	0	1	0	0	111	1	7	1	0	0.666667	1	1	0
457	1	AD	Guayo	30	0	1	0	0	1	0	0	111	1	3	1	0	0.333333	1	0	1
458	0.75	AD	Guayo	27	0	4	0	0	1	0	0	111	1	5	1	0	0.666667	1	0	0
459	1	AD	Guayo	32	0	5	0	0	1	0	0	111	0	7	1	0	0.555556	1	0	1
460	0.5	AD	Guayo	51	1	12	0	0	1	0	0	111	1	6	1	0	0.611111	1	0	1
461	1	AD	Guayo	29	0	6	0	0	1	0	0	111	1	9	1	0	0.277778	1	1	0
462	1	AD	Guayo	48	0	3	0	0	1	0	0	111	1	10	1	0	0.388889	1	0	0
463	1	AD	Guayo	40	0	2	0	0	1	0	0	111	1	10	1	0	0.555556	1	0	0
464	1	AD	Guayo	25	0	2	0	0	1	0	0	111	1	10	0	0	0.388889	1	0	0
465	0.5	AD	Guayo	47	0	12	0	0	1	0	0	111	1	4	0	0	0.555556	1	0	0
466	1	AD	Guayo	19	0	2	0	0	1	0	0	111	0	4	1	0	0.333333	0	0	0
467	1	AD	Guayo	46	0	8	0	0	1	0	0	111	0	3	1	0	0.388889	0	0	0
468	1	AD	Guayo	23	0	3	0	0	1	0	0	111	1	5	1	0	0.333333	1	0	0
469	1	AD	Guayo	27	0	3	0	0	1	0	0	111	1	5	0	0	0.388889	1	0	0
470	1	AD	Guayo	25	0	3	0	0	1	0	0	111	1	8	0	0	0.555556	1	0	0
471	0.625	AD	Guayo	54	0	8	0	0	1	0	0	111	1	8	0	0	0.555556	1	0	0
472	1	AD	Guayo	22	0	2	0	0	1	0	0	111	0	4	1	0	0.5	1	1	0
473	0.428571	AD	Guayo	40	1	7	0	0	1	0	0	111	1	10	1	0	0.722222	1	0	0
474	0.333333	AD	Guayo	47	0	3	0	0	1	0	0	111	1	3	1	0	0.555556	1	0	0
475	0.375	AD	Guayo	44	1	8	0	0	1	0	0	111	1	6	1	0	0.777778	1	0	0
476	1	AD	Guayo	38	1	4	0	0	1	0	0	111	1	19	1	0	0.555556	1	1	0
477	1	AD	Guayo	18	0	2	0	0	1	0	0	111	1	6	1	0	0.611111	1	0	0
478	1	AD	Guayo	37	0	5	0	0	1	0	0	111	0	7	1	0	0.5	1	1	0
479	1	AD	Guayo	29	0	5	0	0	1	0	0	111	1	7	1	0	0.388889	1	0	0
480	0.727273	AD	Guayo	50	1	11	0	0	1	0	0	111	0	9	1	0	0.666667	1	1	0
481	1	AD	Guayo	55	1	1	0	0	1	0	0	111	1	4	1	0	0.333333	1	1	0
482	1	AD	Guayo	34	0	3	0	0	1	0	0	111	1	7	0	0	0.388889	1	0	0
483	1	AD	Guayo	20	1	3	0	0	1	0	0	111	1	13	0	0	0.555556	1	1	0
484	0	AD	Guayo	36	0	1	0	0	1	0	0	111	1	7	0	0	0.722222	1	0	0
485	1	AD	Guayo	23	1	1	0	0	1	0	0	111	1	20	1	0	0.5	0	0	0
486	0.166667	AD	Guayo	57	1	12	0	0	1	0	0	111	1	6	0	0	0.722222	1	0	0
487	0.833333	AD	Guayo	66	1	12	0	0	1	0	0	111	1	6	0	0	0.444444	1	1	0
488	1	AD	Guayo	26	1	2	0	0	1	0	0	111	0	4	1	0	0.555556	1	0	0
489	1	AD	Guayo	45	0	9	0	0	1	0	0	111	0	4	0	0	0.277778	0	0	1
490	1	AD	Guayo	41	1	9	0	0	1	0	0	111	1	7	1	0	0.555556	1	0	0
491	1	AD	Guayo	32	0	2	0	0	1	0	0	111	0	4	1	0	0.388889	0	0	1
492	0.666667	AD	Guayo	34	1	6	0	0	1	0	0	111	1	10	1	1	0.722222	1	0	1
493	0.8	AD	Guayo	33	1	5	0	0	1	0	0	111	1	5	1	0	0.722222	1	0	0
494	0.75	AD	Guayo	35	1	8	0	0	1	0	0	111	1	6	1	0	0.777778	1	0	1
495	1	AD	Guayo	22	0	1	0	0	1	0	0	111	1	4	1	0	0.277778	1	1	0
496	1	AD	Guayo	17	0	1	0	0	1	0	0	111	1	12	1	0	0.555556	1	0	1
497	0.666667	AD	Guayo	25	1	6	0	0	1	0	0	111	1	15	1	0	0.5	0	1	0
498	0.75	AD	Guayo	23	0	4	0	0	1	0	0	111	1	9	1	0	0.666667	1	0	0
499	1	AD	Guayo	63	1	5	0	0	1	0	0	111	0	4	1	0	0.444444	1	0	0
3	0.75	AD	Curiapo	26	1	4	1	1	1	1	1	2	1	5	1	0	0.722222	1		1
5	0.5	AD	Curiapo	38	1	4	1	1	1	1	1	5	1	6	1	1	0.666667	1	1	1
10	1	AD	Curiapo	51	1	2	1	1	1	1	1	5	1	8	1	0	0.333333	1	0	1
26	0.5	AD	Curiapo	30	1	4	1	1	1	1	1	5	1	3	1	0	0.666667	1	0	1
27	0.5	AD	Curiapo	46	1	10	1	1	1	1	1	5	1	3	1	0	0.666667	1	0	1
28	1	AD	Curiapo	21	1	3	1	1	1	1	1	5	1	5	1	0	0.5	1	0	1
32	0.857143	AD	Curiapo	78	1	7	1	1	1	1	1	5	1	5	1	1	0.5	1	1	1
33	0.727273	AD	Curiapo	45	1	11	1	1	1	1	1	5	1	5	1	0	0.666667	1	0	1
34	1	AD	Curiapo	28	1	3	1	1	1	1	1	5	1	6	1	0	0.5	1	0	1
38	0.75	AD	Curiapo	44	1	4	1	1	1	1	1	8	1	5	1	1	0.666667	1	1	1
39	0.727273	AD	Curiapo	35	1	11	1	1	1	1	1	8	1	6	1	1	0.5	1	0	1
40	1	AD	Curiapo	16	1	2	1	1	1	1	1	8	1	8	0	0	0.5	1	1	1
53	0	AD	Curiapo	22	1	1	1	1	1	1	1	8	1	2	0	1	0.555556	1	0	1
54	1	AD	Curiapo	26	1	2	1	1	1	1	1	8	1	4	1	0	0.5	1	0	1
55	0.75	AD	Curiapo	51	1	4	1	1	1	1	1	8	1	4	1	0	0.5	1	1	1
63	1	AD	Curiapo	36	1	8	1	1	1	1	1	9	1	10	1	0	0.5	1	0	1
64	0.2	AD	Curiapo	27	1	5	1	1	1	1	1	9	1	3	1	1	0.5	1	1	1
65	0.555556	AD	Curiapo	27	1	9	1	1	1	1	1	9	1	9	1	0	0.611111	1	1	1
66	1	AD	Curiapo	31	1	2	1	1	1	1	1	9	1	9	1	1	0.5	1	1	1
99	1	AD	Curiapo	25	1	7	1	1	1	1	1	14	1	10	1	0	0.5	1	0	1
100	0.833333	AD	Curiapo	34	1	6	1	1	1	1	1	14	1	8	1	0	0.666667	1	1	1
101	1	AD	Curiapo	25	1	1	1	1	1	1	1	14	1	8	1	0	0.5	1	0	1
102	1	AD	Curiapo	18	1	2	1	1	1	1	1	14	1	6	1	0	0.5	1	1	1
103	0.625	AD	Curiapo	29	1	8	1	1	1	1	1	14	1	7	1	0	0.666667	1	0	1
134	0.8	AD	Curiapo	33	1	5	1	1	1	1	1	10	1	6	1	0	0.611111	1	1	1
135	1	AD	Curiapo	16	1	2	1	1	1	1	1	10	1	3	0	0	0.5	1	0	1
136	1	AD	Curiapo	40	1	4	1	1	1	1	1	10	1	8	1	0	0.5	1	0	1
137	1	AD	Curiapo	36	1	8	1	1	1	1	1	10	1	10	1	0	0.5	1	0	0
138	0.2	AD	Curiapo	25	1	5	1	1	1	1	1	10	1	3	1	0	0.722222	1	0	1
172	0.8	AD	Curiapo	24	1	5	1	1	1	1	1	15	1	5	0	0	0.722222	1	0	1
173	0.6	AD	Curiapo	25	1	5	1	1	1	1	1	15	1	5	1	0	0.722222	1	0	1
174	0.8	AD	Curiapo	29	1	5	1	1	1	1	1	15	1	9	1	0	0.666667	1	0	1
175	0.8	AD	Curiapo	33	1	5	1	1	1	1	1	15	1	6	1	0	0.722222	1	0	1
176	0.636364	AD	Curiapo	46	1	11	1	1	1	1	1	15	1	15	1	0	0.611111	1	0	1
177	0.8	AD	Curiapo	30	1	5	1	1	1	1	1	15	1	8	1	0	0.611111	1	1	1
218	0	AD	Curiapo	38	1	1	1	1	1	1	1	19	1	2	1	0	0.555556	1	1	0
219	0.5	AD	Curiapo	33	0	4	1	1	1	1	1	19	1	3	1	0	0.722222	1	1	1
220	0.6	AD	Curiapo	33	1	5	1	1	1	1	1	19	1	5	1	0	0.722222	1	0	0
221	0.7	AD	Curiapo	37	1	10	1	1	1	1	1	19	1	4	0	1	0.722222	1	0	0
222	0.666667	AD	Curiapo	71	1	6	1	1	1	1	1	19	1	6	1	0	0.666667	1	1	0
223	0.833333	AD	Curiapo	66	1	12	1	1	1	1	1	19	1	9	0	1	0.722222	1	0	1
224	1	AD	Curiapo	31	1	4	1	1	1	1	1	19	1	6	1	0	0.555556	1	0	0
225	0.8	AD	Curiapo	28	1	5	1	1	1	1	1	19	1	6	1	0	0.722222	1	0	1
293	1	AD	Curiapo	34	0	9	0	0	1	1	1	38	1	11	1	0	0.555556	1	0	1
294	1	AD	Curiapo	25	1	3	0	0	1	1	1	38	1	5	1	0	0.555556	1	0	1
295	0.615385	AD	Curiapo	53	1	13	0	0	1	1	1	38	1	4	1	0	0.555556	1	0	1
296	1	AD	Curiapo	47	1	3	0	0	1	1	1	38	1	5	1	0	0.555556	1	0	1
297	1	AD	Curiapo	42	1	3	0	0	1	1	1	38	1	5	1	1	0.555556	1	0	1
298	1	AD	Curiapo	19	0	2	0	0	1	1	1	38	1	15	1	0	0.555556	1	0	1
299	0.6	AD	Curiapo	33	0	5	0	0	1	1	1	38	1	15	1	0	0.611111	1	0	1
300	0.8	AD	Curiapo	30	0	5	0	0	1	1	1	38	1	6	1	1	0.722222	1	0	1
301	1	AD	Curiapo	20	0	3	0	0	1	1	1	38	1	5	1	0	0.5	1	1	0
302	0.8	AD	Curiapo	30	1	5	0	0	1	1	1	38	1	6	1	0	0.722222	1	1	0
303	0.875	AD	Curiapo	51	0	8	0	0	1	1	1	38	1	15	1	0	0.777778	1	0	1
362	1	AD	Curiapo	35	0	4	0	0	0	0	1	102	1	7	1	0	0.222222	0		0
363	0.833333	AD	Curiapo	38	1	6	0	0	0	0	1	102	1	23	1	0	0.388889	0		0
364	0.916667	AD	Curiapo	42	1	12	0	0	0	0	1	102	1	12	1	0	0.388889	0		0
365	0.8	AD	Curiapo	36	1	5	0	0	0	0	1	102	1	7	0	0	0.388889	0		0
366	0.8	AD	Curiapo	35	0	5	0	0	0	0	1	102	1	6	1	0	0.444444	0		1
367	0.428571	AD	Curiapo	37	1	7	0	0	0	0	1	102	1	7	1	0	0.722222	0		1
368	1	AD	Curiapo	32	0	7	0	0	0	0	1	102	1	9	1	0	0.222222	0		0
369	1	AD	Curiapo	31	1	5	0	0	0	0	1	102	1	7	1	0	0.222222	0		0
370	1	AD	Curiapo	42	0	6	0	0	0	0	1	102	0	7	1	0	0.0555556	0		0
371	0.875	AD	Curiapo	34	0	8	0	0	0	0	1	102	1	8	1	0	0.5	0		0
372	0.6	AD	Curiapo	42	0	10	0	0	0	0	1	102	1	7	1	0	0.666667	0		0
373	0.666667	AD	Curiapo	26	1	6	0	0	0	0	1	102	1	13	1	0	0.666667	0		0
374	1	AD	Curiapo	36	1	6	0	0	0	0	1	102	1	8	1	0	0.222222	0		0
375	0.916667	AD	Curiapo	38	0	12	0	0	0	0	1	102	1	12	1	0	0.222222	0		0
376	0.8	AD	Curiapo	28	1	5	0	0	0	0	1	102	1	5	1	0	0.388889	0		0
377	0.333333	AD	Curiapo	33	1	9	0	0	0	0	1	102	1	5	1	0	0.666667	0		0
378	0.6	AD	Curiapo	34	1	5	0	0	0	0	1	102	1	3	1	0	0.666667	0		0
379	0.4	AD	Curiapo	30	1	10	0	0	0	0	1	102	1	6	1	1	0.666667	0		0
400	0.666667	AD	Curiapo	26	1	6	0	0	1	1	0	73	1	10	1	0	0.555556	1	0	1
401	0.5	AD	Curiapo	35	1	6	0	0	1	1	0	73	1	5	1	0	0.722222	1	1	1
402	0.2	AD	Curiapo	43	1	5	0	0	1	1	0	73	1	3	1	1	0.555556	1	0	1
403	0.7	AD	Curiapo	68	1	10	0	0	1	1	0	73	1	8	1	0	0.722222	1	0	1
404	1	AD	Curiapo	17	0	2	0	0	1	1	0	73	1	8	1	0	0.555556	1	0	1
405	0.833333	AD	Curiapo	35	1	6	0	0	1	1	0	73	1	9	1	0	0.611111	1	0	1
406	1	AD	Curiapo	26	1	4	0	0	1	1	0	73	1	7	1	0	0.555556	1	0	1
407	0.833333	AD	Curiapo	27	1	6	0	0	1	1	0	73	1	7	1	1	0.777778	1	0	1
408	0.454545	AD	Curiapo	26	1	11	0	0	1	1	0	73	1	7	1	1	0.777778	1	0	1
409	1	AD	Curiapo	23	1	3	0	0	1	1	0	73	1	5	1	0	0.388889	1	0	1
410	1	AD	Curiapo	18	0	1	0	0	1	1	0	73	1	10	1	0	0.555556	1	0	1
411	0.428571	AD	Curiapo	39	1	7	0	0	1	1	0	73	1	5	1	0	0.722222	1	0	1
412	0.666667	AD	Curiapo	29	1	6	0	0	1	1	0	73	1	6	1	0	0.722222	1	0	1
413	0.666667	AD	Curiapo	41	1	3	0	0	1	1	0	73	1	4	1	0	0.722222	1	0	1
414	0	AD	Curiapo	20	1	2	0	0	1	1	0	73	1	5	1	1	0.722222	1	0	1
415	0.6	AD	Curiapo	27	1	5	0	0	1	1	0	73	1	7	1	0	0.611111	1	0	1
416	1	AD	Curiapo	48	1	4	0	0	1	1	0	73	1	6	1	0	0.388889	1	0	1
417	0.5	AD	Curiapo	34	1	10	0	0	1	1	0	73	1	5	1	0	0.722222	1	0	1
418	1	AD	Curiapo	25	0	1	0	0	1	1	0	73	1	4	1	0	0.611111	1	0	1
419	0.454545	AD	Curiapo	38	1	11	0	0	1	1	0	73	1	5	1	0	0.555556	1	0	1
420	0.428571	AD	Curiapo	33	1	7	0	0	1	1	0	73	1	5	1	0	0.555556	1	0	1
4	1	AD	Nabasanuka	34	0	3	0	1	1	1	1	5	1	6	1	0	0.388889	0		1
11	0.416667	AD	Nabasanuka	45	0	12	1	1	1	1	1	6	1	6	1	0	0.555556	1		1
12	0.75	AD	Nabasanuka	65	1	12	1	1	1	1	1	6	1	4	1	1	0.555556	1		1
59	0.75	AD	Nabasanuka	28	0	4	0	1	1	1	1	8	1	5	1	0	0.722222	0		0
60	1	AD	Nabasanuka	26	0	1	0	1	1	1	1	8	0	6	1	0	0.388889	0		0
61	1	AD	Nabasanuka	27	0	1	0	1	1	1	1	8	1	9	0	0	0.555556	1		0
62	0.666667	AD	Nabasanuka	25	1	12	0	1	1	1	1	8	1	6	1	0	0.722222	1		1
67	1	AD	Nabasanuka	16	1	2	1	1	1	1	1	21	1	6	1	0	0.5	1	0	1
68	1	AD	Nabasanuka	29	0	1	1	1	1	1	1	21	1	3	1	0	0.166667	1	0	1
69	1	AD	Nabasanuka	28	0	2	1	1	1	1	1	21	1	4	1	0	0.555556	1	0	1
70	0.8	AD	Nabasanuka	55	0	10	1	1	1	1	1	21	1	7	1	0	0.722222	1	0	1
149	1	AD	Nabasanuka	34	0	5	0	0	1	0	0	10	0	8	1	0	0.5	0	0	1
150	0.666667	AD	Nabasanuka	42	1	12	0	0	1	0	0	10	1	9	1	0	0.666667	1	0	0
151	0.333333	AD	Nabasanuka	41	1	15	0	0	1	0	0	10	1	9	1	0	0.666667	1	0	0
152	0.454545	AD	Nabasanuka	64	1	11	0	0	1	0	0	10	1	4	1	0	0.666667	1	0	0
153	0.3	AD	Nabasanuka	47	1	10	0	0	1	0	0	10	1	4	1	0	0.722222	0	0	0
197	0.777778	AD	Nabasanuka	34	0	9	0	1	1	1	1	20	1	9	1	0	0.5	1	1	0
198	0.9	AD	Nabasanuka	44	0	10	0	1	1	1	1	20	1	9	1	0	0.555556	1	1	1
199	1	AD	Nabasanuka	31	0	4	0	1	1	1	1	20	1	6	1	0	0.5	1	1	0
200	0.625	AD	Nabasanuka	35	1	8	0	1	1	1	1	20	1	8	1	0	0.722222	1	0	0
201	0.9	AD	Nabasanuka	44	1	10	0	1	1	1	1	20	1	10	1	0	0.722222	1	0	0
202	1	AD	Nabasanuka	21	1	3	0	1	1	1	1	20	1	5	1	0	0.555556	1	0	0
203	0.333333	AD	Nabasanuka	22	1	3	0	1	1	1	1	20	1	3	1	0	0.722222	0	1	0
243	0.5	AD	Nabasanuka	19	0	4	0	1	0	1	1	20	1	9	1	0	0.444444	0	1	0
244	0.785714	AD	Nabasanuka	49	0	14	0	1	0	1	1	20	1	9	1	0	0.444444	0	1	0
245	1	AD	Nabasanuka	35	1	6	0	1	0	1	1	20	1	6	1	0	0.5	0	0	0
246	0.6	AD	Nabasanuka	32	0	10	0	1	0	1	1	20	1	9	1	0	0.611111	0	0	0
247	0.75	AD	Nabasanuka	37	1	12	0	1	0	1	1	20	1	12	1	0	0.5	0	0	0
248	0.727273	AD	Nabasanuka	45	1	11	0	1	0	1	1	20	1	8	1	0	0.666667	0	0	0
249	0.833333	AD	Nabasanuka	36	1	6	0	1	0	1	1	20	1	15	1	0	0.722222	1	0	0
250	1	AD	Nabasanuka	20	0	1	0	1	0	1	1	20	1	13	1	0	0.555556	1	0	0
251	1	AD	Nabasanuka	16	0	1	0	1	0	1	1	20	1	13	0	0	0.555556	1	0	0
272	0	AD	Nabasanuka	19	0	1	0	1	1	1	1	45	1	2	1	1	0.555556	1	0	1
273	0.615385	AD	Nabasanuka	52	0	13	0	1	1	1	1	45	1	4	1	1	0.5	1	1	1
274	0.714286	AD	Nabasanuka	27	1	7	0	1	1	1	1	45	1	7	1	0	0.666667	1	0	1
275	1	AD	Nabasanuka	17	0	1	0	1	1	1	1	45	1	3	0	0	0.555556	1	0	1
276	0.6	AD	Nabasanuka	25	0	5	0	1	1	1	1	45	1	5	1	1	0.722222	1	0	1
277	0.75	AD	Nabasanuka	24	0	4	0	1	1	1	1	45	1	5	1	0	0.722222	1	0	1
278	1	AD	Nabasanuka	29	0	3	0	1	1	1	1	45	1	5	1	1	0.555556	1	0	1
279	0.75	AD	Nabasanuka	27	0	4	0	1	1	1	1	45	1	5	1	0	0.555556	1	0	1
280	0.857143	AD	Nabasanuka	34	0	7	0	1	1	1	1	45	1	8	1	0	0.555556	1	0	1
281	0.888889	AD	Nabasanuka	46	0	9	0	1	1	1	1	45	1	11	1	0	0.277778	0	1	1
331	0.9	AD	Nabasanuka	42	0	10	0	0	1	0	0	55	1	13	1	0	0.444444	1		0
332	1	AD	Nabasanuka	34	0	4	0	0	1	0	0	55	0	3	1	0	0.111111	0		1
333	0.5	AD	Nabasanuka	30	1	6	0	0	1	0	0	55	1	5	1	0	0.722222	0		0
334	0.5	AD	Nabasanuka	31	1	4	0	0	1	0	0	55	1	4	1	0	0.722222	1		0
335	1	AD	Nabasanuka	32	0	3	0	0	1	0	0	55	0	5	1	0	0.166667	0		0
336	1	AD	Nabasanuka	24	0	3	0	0	1	0	0	55	1	5	1	0	0.166667	0		1
337	0.727273	AD	Nabasanuka	59	0	11	0	0	1	0	0	55	1	16	1	0	0.333333	0		0
338	0.666667	AD	Nabasanuka	49	0	6	0	0	1	0	0	55	0	16	1	0	0.722222	0		0
339	1	AD	Nabasanuka	30	0	3	0	0	1	0	0	55	1	11	1	0	0.166667	0		0
340	1	AD	Nabasanuka	18	0	1	0	0	1	0	0	55	0	10	1	0	0.166667	0		0
341	0.888889	AD	Nabasanuka	80	0	9	0	0	1	0	0	55	0	5	0	0	0.444444	1		0
342	0.666667	AD	Nabasanuka	32	0	6	0	0	1	0	0	55	1	7	1	0	0.555556	0		0
343	1	AD	Nabasanuka	36	0	2	0	0	1	0	0	55	0	3	1	0	0.166667	0		0
344	0.75	AD	Nabasanuka	33	0	4	0	0	1	0	0	55	0	5	1	0	0.333333	0		0
345	1	AD	Nabasanuka	18	0	1	0	0	0	1	1	80	1	11	1	0	0.333333	1	0	0
346	0.75	AD	Nabasanuka	30	0	4	0	0	0	1	1	80	0	11	1	0	0.666667	1	0	0
347	1	AD	Nabasanuka	35	0	1	0	0	0	1	1	80	0	7	0	0	0.277778	1	0	0
348	1	AD	Nabasanuka	42	0	8	0	0	0	1	1	80	0	9	1	0	0.111111	1	0	0
349	1	AD	Nabasanuka	28	0	3	0	0	0	1	1	80	1	5	1	0	0.333333	1	0	0
350	1	AD	Nabasanuka	34	0	4	0	0	0	1	1	80	0	6	1	0	0.555556	1	0	0
351	1	AD	Nabasanuka	33	0	6	0	0	0	1	1	80	0	8	1	0	0.555556	1	0	0
352	0.727273	AD	Nabasanuka	40	0	11	0	0	0	1	1	80	1	10	1	0	0.555556	1	1	0
353	0.625	AD	Nabasanuka	38	0	8	0	0	0	1	1	80	1	10	1	0	0.555556	1	0	0
354	1	AD	Nabasanuka	33	0	5	0	0	0	1	1	80	1	7	1	0	0.444444	1	1	0
355	1	AD	Nabasanuka	23	1	3	0	0	0	1	1	80	1	4	1	0	0.611111	1	0	0
356	0.714286	AD	Nabasanuka	33	0	7	0	0	0	1	1	80	1	9	1	0	0.722222	1	0	0
357	1	AD	Nabasanuka	52	0	7	0	0	0	1	1	80	1	9	1	0	0.388889	1	1	0
358	0.5	AD	Nabasanuka	54	1	14	0	0	0	1	1	80	1	7	1	0	0.722222	1	0	0
359	1	AD	Nabasanuka	32	0	7	0	0	0	1	1	80	1	9	1	0	0.388889	1	0	0
360	0.75	AD	Nabasanuka	56	0	8	0	0	0	1	1	80	0	6	1	0	0.5	1	0	0
361	1	AD	Nabasanuka	23	0	2	0	0	0	1	1	80	1	7	1	0	0.555556	1	0	0

## Sheet: Traditional Household
			Traditional Architecture														Ceilling								Walls											Floor
Mother's ID	Municipality	Subregion	Floor: Wood Boards	Floor: Logs	FLOOR	Walls: Palm leaves (Manicaria s.)	Without walls	WALLS	Ceilling: Palm leaves (Manicaria s.)	One Environment	SUM	Traditional Architecture	Spanish spoken at home by the mother	Traditional Household: spanish is not spoken at home			Concrete	Zinc	Cane	Asbestos	Tile	Palm leaves (Manicaria s.)	Other		Concrete/Paint	Concrete	Cardboard	Plastic Bags	Adobe	Zinc	Wood	Palm leaves (Manicaria s.)	Without walls	Walls Partially		Sand or Dung Floor	Concrete	Wood Boards	Logs	Tiles	Others
1	PED	PED-Manamo	1	0	1	0	1	1	0	1	3	0	1	0			0	1	0	0	0	0	0		0	0	0	0	0	0	0	0	1	0		0	0	1	0	0	0
4	PED	PED-Manamo	0	1	1	0	1	1	1	1	4	1	0	1			0	0	0	0	0	1	0		0	0	0	0	0	0	0	0	1	0		0	0	0	1	0	0
5	PED	PED-Manamo	1	0	1	0	0	0	0	1	2	0	0	0			0	1	0	0	0	0	0		0	0	0	0	0	0	1	0	0	0		0	0	1	0	0	0
6	PED	PED-Manamo	1	0	1	0	0	0	1	0	2	0	0	0			0	0	0	0	0	1	0		0	0	0	0	0	0	1	0	0	0		0	0	1	0	0	0
11	PED	PED-Manamo	1	0	1	0	1	1	0	1	3	0	1	0			0	0	0	1	0	0	0		0	0	0	0	0	0	0	0	1	0		0	0	1	0	0	0
12	PED	PED-Manamo	1	0	1	1	0	1	0	1	3	0	0	0			0	1	0	0	0	0	0		0	0	0	0	0	0	0	1	0	0		0	0	1	0	0	0
13	PED	PED-Manamo	1	0	1	0	0	0	0	0	1	0	1	0			0	1	0	0	0	0	0		0	0	0	0	0	0	1	0	0	0		0	0	1	0	0	0
14	PED	PED-Manamo	1	0	1	0	0	0	0	0	1	0	1	0			0	1	0	0	0	0	0		0	0	0	0	0	1	0	0	0	0		0	0	1	0	0	0
27	PED	PED-Manamo	1	0	1	0	1	1	1	1	4	1	0	1			0	0	0	0	0	1	0		0	0	0	0	0	0	0	0	1	0		0	0	1	0	0	0
28	PED	PED-Manamo	0	1	1	0	1	1	0	1	3	0	0	0			0	1	0	0	0	0	0		0	0	0	0	0	0	0	0	1	0		0	0	0	1	0	0
29	PED	PED-Manamo	1	0	1	0	0	0	0	0	1	0	0	0			0	1	0	0	0	0	0		0	0	0	0	0	0	1	0	0	0		0	0	1	0	0	0
30	PED	PED-Manamo	0	1	1	0	1	1	0	1	3	0	0	0			0	1	0	0	0	0	0		0	0	0	0	0	0	0	0	1	0		0	0	0	1	0	0
31	PED	PED-Manamo	1	0	1	0	0	0	1	0	2	0	0	0			0	0	0	0	0	1	0		0	0	0	0	0	0	1	0	0	0		0	0	1	0	0	0
32	PED	PED-Manamo	1	0	1	0	0	0	1	0	2	0	0	0			0	0	0	0	0	1	0		0	0	0	0	0	0	1	0	0	0		0	0	1	0	0	0
33	PED	PED-Manamo	1	0	1	0	1	1	0	0	2	0	0	0			0	1	0	0	0	0	0		0	0	0	0	0	0	0	0	1	0		0	0	1	0	0	0
34	PED	PED-Manamo	0	1	1	0	1	1	0	1	3	0	0	0			0	1	0	0	0	0	0		0	0	0	0	0	0	0	0	1	0		0	0	0	1	0	0
35	PED	PED-Manamo	1	0	1	0	1	1	1	0	3	0	1	0			0	0	0	0	0	1	0		0	0	0	0	0	0	0	0	1	0		0	0	1	0	0	0
36	PED	PED-Manamo	1	0	1	0	0	0	0	0	1	0	1	0			0	1	0	0	0	0	0		0	0	0	0	0	0	1	0	0	0		0	0	1	0	0	0
37	PED	PED-Manamo	0	1	1	0	0	0	0	0	1	0	1	0			0	1	0	0	0	0	0		0	0	0	0	0	1	0	0	0	0		0	0	0	1	0	0
38	PED	PED-Manamo	0	1	1	0	0	0	0	0	1	0	0	0			0	1	0	0	0	0	0		0	0	0	0	0	1	0	0	0	0		0	0	0	1	0	0
39	PED	PED-Manamo	0	0	0	0	0	0	0	0	0	0	0	0			0	1	0	0	0	0	0		0	1	0	0	0	0	0	0	0	0		0	1	0	0	0	0
40	PED	PED-Manamo	0	0	0	0	0	0	0	0	0	0	0	0			0	1	0	0	0	0	0		0	1	0	0	0	0	0	0	0	0		0	1	0	0	0	0
41	PED	PED-Manamo	0	0	0	0	1	1	0	1	2	0	0	0			0	1	0	0	0	0	0		0	0	0	0	0	0	0	0	1	0		0	1	0	0	0	0
42	PED	PED-Manamo	0	1	1	0	1	1	0	1	3	0	1	0			0	1	0	0	0	0	0		0	0	0	0	0	0	0	0	1	0		0	0	0	1	0	0
43	PED	PED-Manamo	0	0	0	0	1	1	0	1	2	0	1	0			0	1	0	0	0	0	0		0	0	0	0	0	0	0	0	1	0		0	1	0	0	0	0
44	PED	PED-Manamo	0	0	0	0	1	1	0	1	2	0	0	0			0	1	0	0	0	0	0		0	0	0	0	0	0	0	0	1	0		0	1	0	0	0	0
45	PED	PED-Manamo	0	0	0	0	0	0	0	0	0	0	1	0			0	1	0	0	0	0	0		0	1	0	0	0	0	0	0	0	0		0	1	0	0	0	0
46	PED	PED-Manamo	1	0	1	0	0	0	1	0	2	0	1	0			0	0	0	0	0	1	0		0	0	0	0	0	0	1	0	0	0		0	0	1	0	0	0
47	PED	PED-Manamo	1	0	1	0	0	0	1	0	2	0	1	0			0	0	0	0	0	1	0		0	0	0	0	0	0	1	0	0	0		0	0	1	0	0	0
48	PED	PED-Manamo	1	0	1	0	0	0	1	1	3	0	0	0			0	0	0	0	0	1	0		0	0	0	0	0	0	0	0	0	1		0	0	1	0	0	0
49	PED	PED-Manamo	0	0	0	0	1	1	1	1	3	0	0	0			0	0	0	0	0	1	0		0	0	0	0	0	0	0	0	1	0		1	0	0	0	0	0
62	PED	PED-Manamo	0	1	1	0	1	1	0	1	3	0	0	0			0	1	0	0	0	0	0		0	0	0	0	0	0	0	0	1	0		0	0	0	1	0	0
63	PED	PED-Manamo	0	1	1	0	1	1	1	0	3	0	0	0			0	0	0	0	0	1	0		0	0	0	0	0	0	0	0	1	0		0	0	0	1	0	0
64	PED	PED-Manamo	0	1	1	0	1	1	1	1	4	1	0	1			0	0	0	0	0	1	0		0	0	0	0	0	0	0	0	1	0		0	0	0	1	0	0
65	PED	PED-Manamo	0	1	1	0	1	1	1	1	4	1	1	0			0	0	0	0	0	1	0		0	0	0	0	0	0	0	0	1	0		0	0	0	1	0	0
66	PED	PED-Manamo	0	1	1	0	1	1	1	0	3	0	1	0			0	0	0	0	0	1	0		0	0	0	0	0	0	0	0	1	0		0	0	0	1	0	0
67	PED	PED-Manamo	0	1	1	0	1	1	1	0	3	0	0	0			0	0	0	0	0	1	0		0	0	0	0	0	0	0	0	1	0		0	0	0	1	0	0
68	PED	PED-Manamo	0	1	1	0	1	1	1	0	3	0	0	0			0	0	0	0	0	1	0		0	0	0	0	0	0	0	0	1	0		0	0	0	1	0	0
69	PED	PED-Manamo	1	0	1	0	0	0	1	1	3	0	0	0			0	0	0	0	0	1	0		0	0	0	0	0	0	1	0	0	0		0	0	1	0	0	0
70	PED	PED-Manamo	1	0	1	0	1	1	0	1	3	0	0	0			0	1	0	0	0	0	0		0	0	0	0	0	0	0	0	1	0		0	0	1	0	0	0
71	PED	PED-Manamo	1	0	1	0	1	1	0	0	2	0	1	0			0	1	0	0	0	0	0		0	0	0	0	0	0	0	0	1	0		0	0	1	0	0	0
72	PED	PED-Manamo	1	0	1	0	1	1	0	0	2	0	1	0			0	1	0	0	0	0	0		0	0	0	0	0	0	0	0	1	0		0	0	1	0	0	0
73	PED	PED-Manamo	1	0	1	0	0	0	1	0	2	0	0	0			0	0	0	0	0	1	0		0	0	0	0	0	0	1	0	0	0		0	0	1	0	0	0
74	PED	PED-Manamo	1	0	1	0	0	0	1	0	2	0	1	0			0	0	0	0	0	1	0		0	0	0	0	0	0	1	0	0	0		0	0	1	0	0	0
75	PED	PED-Manamo	1	0	1	0	1	1	1	1	4	1	0	1			0	0	0	0	0	1	0		0	0	0	0	0	0	0	0	1	0		0	0	1	0	0	0
76	PED	PED-Manamo	1	0	1	0	0	0	0	1	2	0	1	0			0	1	0	0	0	0	0		0	0	0	0	0	0	1	0	0	0		0	0	1	0	0	0
77	PED	PED-Manamo	1	0	1	0	0	0	0	0	1	0	1	0			0	1	0	0	0	0	0		0	0	0	0	0	0	1	0	0	0		0	0	1	0	0	0
78	PED	PED-Manamo	0	0	0	0	0	0	0	0	0	0	1	0			0	1	0	0	0	0	0		0	0	0	0	0	1	0	0	0	0		0	1	0	0	0	0
79	PED	PED-Manamo	0	0	0	0	0	0	0	0	0	0	0	0			0	1	0	0	0	0	0		0	0	0	0	0	1	0	0	0	0		0	1	0	0	0	0
80	PED	PED-Manamo	1	0	1	0	0	0	0	0	1	0	0	0			0	1	0	0	0	0	0		0	0	0	0	0	0	1	0	0	0		0	0	1	0	0	0
81	PED	PED-Manamo	1	0	1	0	0	0	0	0	1	0	1	0			0	1	0	0	0	0	0		0	0	0	0	0	0	1	0	0	0		0	0	1	0	0	0
82	PED	PED-Manamo	0	1	1	0	0	0	0	0	1	0	1	0			0	1	0	0	0	0	0		0	0	0	0	0	0	0	0	0	1		0	0	0	1	0	0
83	PED	PED-Manamo	1	0	1	0	0	0	0	1	2	0	1	0			0	1	0	0	0	0	0		0	0	0	0	0	1	0	0	0	0		0	0	1	0	0	0
84	PED	PED-Manamo	0	0	0	0	0	0	0	0	0	0	1	0			0	1	0	0	0	0	0		0	0	0	0	0	0	0	0	0	1		1	0	0	0	0	0
85	PED	PED-Manamo	0	0	0	0	0	0	0	0	0	0	1	0			0	1	0	0	0	0	0		0	0	0	0	0	0	0	0	0	1		1	0	0	0	0	0
86	PED	PED-Manamo	0	0	0	0	0	0	0	0	0	0	1	0			0	1	0	0	0	0	0		0	0	0	0	0	0	0	0	0	1		1	0	0	0	0	0
87	PED	PED-Manamo	0	0	0	0	0	0	0	0	0	0	1	0			0	1	0	0	0	0	0		0	0	0	0	0	0	0	0	0	1		1	0	0	0	0	0
88	PED	PED-Manamo	1	0	1	0	0	0	0	0	1	0	1	0			0	1	0	0	0	0	0		0	0	0	0	0	1	0	0	0	0		0	0	1	0	0	0
89	PED	PED-Manamo	1	0	1	0	1	1	0	1	3	0	1	0			0	1	0	0	0	0	0		0	0	0	0	0	0	0	0	1	0		0	0	1	0	0	0
90	PED	PED-Manamo	1	0	1	0	0	0	0	0	1	0	1	0			0	1	0	0	0	0	0		0	0	0	0	0	1	0	0	0	0		0	0	1	0	0	0
91	PED	PED-Manamo	1	0	1	0	0	0	1	1	3	0	1	0			0	0	0	0	0	1	0		0	0	0	0	0	0	1	0	0	0		0	0	1	0	0	0
92	PED	PED-Manamo	1	0	1	0	1	1	0	0	2	0	1	0			0	1	0	0	0	0	0		0	0	0	0	0	0	0	0	1	0		0	0	1	0	0	0
93	PED	PED-Manamo	1	0	1	0	1	1	1	1	4	1	1	0			0	0	0	0	0	1	0		0	0	0	0	0	0	0	0	1	0		0	0	1	0	0	0
94	PED	PED-Manamo	1	0	1	0	1	1	1	1	4	1	0	1			0	0	0	0	0	1	0		0	0	0	0	0	0	0	0	1	0		0	0	1	0	0	0
95	PED	PED-Manamo	1	0	1	0	0	0	0	0	1	0	1	0			0	1	0	0	0	0	0		0	0	0	0	0	1	1	0	0	1		0	0	1	0	0	0
96	PED	PED-Manamo	1	0	1	0	0	0	0	0	1	0	0	0			0	1	0	0	0	0	0		0	0	0	0	0	1	1	0	0	1		0	0	1	0	0	0
97	PED	PED-Manamo	1	0	1	0	0	0	0	0	1	0	1	0			0	1	0	0	0	0	0		0	0	0	0	0	1	1	0	0	0		0	0	1	0	0	0
98	PED	PED-Manamo	1	0	1	0	0	0	0	1	2	0	0	0			0	1	0	0	0	0	0		0	0	0	0	0	0	1	0	0	1		0	0	1	0	0	0
2	PED	PED-Waranoko	1	0	1	0	1	1	0	1	3	0	0	0			0	1	0	0	0	0	0		0	0	0	0	0	0	0	0	1	0		0	0	1	0	0	0
3	PED	PED-Waranoko	1	0	1	0	1	1	1	1	4	1	0	1			0	0	0	0	0	1	0		0	0	0	0	0	0	0	0	1	0		0	0	1	0	0	0
7	PED	PED-Waranoko	0	1	1	0	1	1	1	0	3	0	0	0			0	0	0	0	0	1	0		0	0	0	0	0	0	0	0	1	0		0	0	0	1	0	0
8	PED	PED-Waranoko	0	1	1	0	1	1	1	0	3	0	0	0			0	0	0	0	0	1	0		0	0	0	0	0	0	0	0	1	0		0	0	0	1	0	0
9	PED	PED-Waranoko	0	1	1	0	1	1	1	0	3	0	0	0			0	0	0	0	0	1	0		0	0	0	0	0	0	0	0	1	0		0	0	0	1	0	0
10	PED	PED-Waranoko	0	1	1	0	1	1	1	0	3	0	0	0			0	0	0	0	0	1	0		0	0	0	0	0	0	0	0	1	0		0	0	0	1	0	0
15	PED	PED-Waranoko	1	0	1	0	1	1	0	1	3	0	0	0			0	1	0	0	0	0	0		0	0	0	0	0	0	0	0	1	0		0	0	1	0	0	0
16	PED	PED-Waranoko	0	0	0	0	1	1	0	0	1	0	0	0			0	1	0	0	0	0	0		0	0	0	0	0	0	0	0	1	0		0	0	0	0	0	1
17	PED	PED-Waranoko	1	0	1	0	1	1	0	0	2	0	0	0			0	1	0	0	0	0	0		0	0	0	0	0	0	0	0	1	0		0	0	1	0	0	0
18	PED	PED-Waranoko	1	0	1	0	1	1	1	0	3	0	0	0			0	0	0	0	0	1	0		0	0	0	0	0	0	0	0	1	0		0	0	1	0	0	0
19	PED	PED-Waranoko	1	0	1	0	1	1	0	0	2	0	1	0			0	1	0	0	0	0	0		0	0	0	0	0	0	0	0	1	0		0	0	1	0	0	0
20	PED	PED-Waranoko	1	0	1	0	1	1	0	1	3	0	0	0			0	1	0	0	0	0	0		0	0	0	0	0	0	0	0	1	0		0	0	1	0	0	0
21	PED	PED-Waranoko	1	0	1	0	1	1	0	0	2	0	0	0			0	1	0	0	0	0	0		0	0	0	0	0	0	0	0	1	0		0	0	1	0	0	0
22	PED	PED-Waranoko	0	1	1	0	1	1	1	0	3	0	0	0			0	0	0	0	0	1	0		0	0	0	0	0	0	0	0	1	0		0	0	0	1	0	0
23	PED	PED-Waranoko	0	1	1	0	1	1	1	0	3	0	0	0			0	0	0	0	0	1	0		0	0	0	0	0	0	0	0	1	0		0	0	0	1	0	0
24	PED	PED-Waranoko	1	0	1	0	1	1	0	0	2	0	0	0			0	1	0	0	0	0	0		0	0	0	0	0	0	0	0	1	0		0	0	1	0	0	0
25	PED	PED-Waranoko	0	1	1	0	1	1	0	0	2	0	0	0			0	1	0	0	0	0	0		0	0	0	0	0	0	0	0	1	0		0	0	0	1	0	0
26	PED	PED-Waranoko	1	0	1	0	1	1	0	0	2	0	0	0			0	1	0	0	0	0	0		0	0	0	0	0	0	0	0	1	0		0	0	1	0	0	0
50	PED	PED-Waranoko	0	1	1	0	1	1	0	1	3	0	0	0			0	1	0	0	0	0	0		0	0	0	0	0	0	0	0	1	0		0	0	0	1	0	0
51	PED	PED-Waranoko	0	1	1	0	1	1	0	1	3	0	0	0			0	1	0	0	0	0	0		0	0	0	0	0	0	0	0	1	0		0	0	0	1	0	0
52	PED	PED-Waranoko	1	0	1	0	1	1	0	1	3	0	0	0			0	1	0	0	0	0	0		0	0	0	0	0	0	0	0	1	0		0	0	1	0	0	0
53	PED	PED-Waranoko	1	0	1	0	1	1	0	1	3	0	0	0			0	1	0	0	0	0	0		0	0	0	0	0	0	0	0	1	0		0	0	1	0	0	0
54	PED	PED-Waranoko	0	1	1	0	1	1	0	1	3	0	0	0			0	1	0	0	0	0	0		0	0	0	0	0	0	0	0	1	0		0	0	0	1	0	0
55	PED	PED-Waranoko	1	0	1	0	1	1	0	1	3	0	0	0			0	1	0	0	0	0	0		0	0	0	0	0	0	0	0	1	0		0	0	1	0	0	0
56	PED	PED-Waranoko	0	1	1	0	0	0	0	1	2	0	0	0			0	1	0	0	0	0	0		0	0	0	0	0	0	0	0	0	1		0	0	0	1	0	0
57	PED	PED-Waranoko	0	1	1	0	1	1	0	1	3	0	0	0			0	1	0	0	0	0	0		0	0	0	0	0	0	0	0	1	0		0	0	0	1	0	0
58	PED	PED-Waranoko	0	1	1	0	1	1	0	1	3	0	0	0			0	1	0	0	0	0	0		0	0	0	0	0	0	0	0	1	0		0	0	0	1	0	0
59	PED	PED-Waranoko	0	1	1	0	1	1	1	1	4	1	0	1			0	0	0	0	0	1	0		0	0	0	0	0	0	0	0	1	0		0	0	0	1	0	0
60	PED	PED-Waranoko	0	1	1	0	1	1	0	1	3	0	0	0			0	1	0	0	0	0	0		0	0	0	0	0	0	0	0	1	0		0	0	0	1	0	0
61	PED	PED-Waranoko	0	1	1	0	1	1	1	0	3	0	0	0			0	0	0	0	0	1	0		0	0	0	0	0	0	0	0	1	0		0	0	0	1	0	0
1	TUC	Makareo-Mariusa	0	1	1	0	1	1	1	0	3	0	0	0			0	0	0	0	0	1	0		0	0	0	0	0	0	0	0	1	0		0	0	0	1	0	0
2	TUC	Makareo-Mariusa	1	0	1	0	1	1	0	1	3	0	0	0			0	1	0	0	0	0	0		0	0	0	0	0	0	0	0	1	0		0	0	1	0	0	0
4	TUC	Makareo-Mariusa	0	1	1	0	1	1	1	1	4	1	0	1			0	0	0	0	0	1	0		0	0	0	0	0	0	0	0	1	0		0	0	0	1	0	0
5	TUC	Makareo-Mariusa	0	1	1	0	1	1	1	1	4	1	0	1			0	0	0	0	0	1	0		0	0	0	0	0	0	0	0	1	0		0	0	0	1	0	0
13	TUC	Makareo-Mariusa	1	0	1	0	0	0	1	1	3	0	0	0			0	0	0	0	0	1	0		0	0	0	0	0	0	1	0	0	0		0	0	1	0	0	0
14	TUC	Makareo-Mariusa	1	0	1	0	0	0	1	1	3	0	0	0			0	0	0	0	0	1	0		0	0	0	0	0	0	1	0	0	0		0	0	1	0	0	0
15	TUC	Makareo-Mariusa	1	0	1	0	0	0	1	1	3	0	0	0			0	0	0	0	0	1	0		0	0	0	1	0	0	0	0	0	0		0	0	1	0	0	0
16	TUC	Makareo-Mariusa	1	0	1	0	0	0	1	1	3	0	0	0			0	0	0	0	0	1	0		0	0	0	1	0	0	0	0	0	0		0	0	1	0	0	0
17	TUC	Makareo-Mariusa	1	0	1	0	1	1	1	1	4	1	0	1			0	0	0	0	0	1	0		0	0	0	0	0	0	0	0	1	0		0	0	1	0	0	0
18	TUC	Makareo-Mariusa	1	0	1	0	1	1	1	1	4	1	0	1			0	0	0	0	0	1	0		0	0	0	0	0	0	0	0	1	0		0	0	1	0	0	0
19	TUC	Makareo-Mariusa	1	0	1	0	0	0	1	1	3	0	0	0			0	0	0	0	0	1	0		0	0	0	0	0	1	0	0	0	0		0	0	1	0	0	0
20	TUC	Makareo-Mariusa	1	0	1	0	0	0	0	1	2	0	0	0			0	1	0	0	0	0	0		0	0	0	0	0	0	1	0	0	0		0	0	1	0	0	0
21	TUC	Makareo-Mariusa	1	0	1	0	1	1	1	1	4	1	0	1			0	0	0	0	0	1	0		0	0	0	0	0	0	0	0	1	0		0	0	1	0	0	0
31	TUC	Makareo-Mariusa	0	1	1	0	0	0	0	1	2	0	0	0			0	1	0	0	0	0	0		0	0	0	0	0	1	0	0	0	0		0	0	0	1	0	0
32	TUC	Makareo-Mariusa	1	0	1	0	0	0	0	0	1	0	1	0			0	1	0	0	0	0	0		0	0	0	0	0	0	1	0	0	0		0	0	1	0	0	0
33	TUC	Makareo-Mariusa	0	1	1	0	0	0	1	1	3	0	0	0			0	0	0	0	0	1	0		0	0	0	0	0	1	0	0	0	0		0	0	0	1	0	0
34	TUC	Makareo-Mariusa	0	1	1	0	0	0	0	1	2	0	1	0			0	1	0	0	0	0	0		0	0	0	0	0	1	0	0	0	0		0	0	0	1	0	0
35	TUC	Makareo-Mariusa	0	1	1	0	0	0	0	1	2	0	0	0			0	1	0	0	0	0	0		0	0	0	0	0	1	0	0	0	0		0	0	0	1	0	0
36	TUC	Makareo-Mariusa	1	0	1	0	0	0	0	1	2	0	0	0			0	1	0	0	0	0	0		0	0	0	0	0	0	0	0	0	1		0	0	1	0	0	0
37	TUC	Makareo-Mariusa	1	0	1	0	0	0	0	0	1	0	0	0			0	1	0	0	0	0	0		0	0	0	0	0	0	1	0	0	0		0	0	1	0	0	0
38	TUC	Makareo-Mariusa	1	0	1	0	0	0	0	0	1	0	0	0			0	1	0	0	0	0	0		0	0	0	0	0	0	1	0	0	0		0	0	1	0	0	0
39	TUC	Makareo-Mariusa	1	0	1	0	0	0	0	1	2	0	0	0			0	1	0	0	0	0	0		0	0	0	0	0	0	1	0	0	0		0	0	1	0	0	0
40	TUC	Makareo-Mariusa	0	1	1	0	0	0	0	1	2	0	1	0			0	1	0	0	0	0	0		0	0	0	0	0	0	0	0	0	1		0	0	0	1	0	0
41	TUC	Makareo-Mariusa	0	1	1	0	0	0	0	1	2	0	0	0			0	1	0	0	0	0	0		0	0	0	0	0	1	0	0	0	0		0	0	0	1	0	0
42	TUC	Makareo-Mariusa	1	0	1	0	0	0	0	1	2	0	1	0			0	1	0	0	0	0	0		0	0	0	0	0	1	0	0	0	0		0	0	1	0	0	0
43	TUC	Makareo-Mariusa	1	0	1	0	0	0	0	1	2	0	0	0			0	1	0	0	0	0	0		0	0	0	0	0	0	1	0	0	0		0	0	1	0	0	0
44	TUC	Makareo-Mariusa	1	0	1	0	0	0	0	0	1	0	1	0			0	1	0	0	0	0	0		0	0	0	0	0	1	0	0	0	0		0	0	1	0	0	0
67	TUC	Makareo-Mariusa	1	0	1	0	0	0	0	0	1	0	0	0			0	0	0	1	0	0	0		0	0	0	0	0	0	1	0	0	0		0	0	1	0	0	0
68	TUC	Makareo-Mariusa	0	1	1	0	1	1	1	1	4	1	0	1			0	1	0	0	0	1	0		0	0	0	0	0	1	0	0	1	0		0	0	0	1	0	0
69	TUC	Makareo-Mariusa	0	1	1	0	0	0	0	1	2	0	0	0			0	1	0	0	0	0	0		0	0	0	0	0	1	0	0	0	0		0	0	0	1	0	0
70	TUC	Makareo-Mariusa	0	1	1	0	0	0	0	1	2	0	0	0			0	1	0	0	0	0	0		0	0	0	0	0	1	0	0	0	0		0	0	0	1	0	0
71	TUC	Makareo-Mariusa	0	1	1	0	0	0	0	1	2	0	1	0			0	1	0	0	0	0	0		0	0	0	0	0	1	0	0	0	0		0	0	0	1	0	0
72	TUC	Makareo-Mariusa	1	0	1	0	1	1	0	0	2	0	0	0			0	1	0	0	0	0	0		0	0	0	0	0	0	0	0	1	0		0	0	1	0	0	0
73	TUC	Makareo-Mariusa	1	0	1	0	1	1	0	0	2	0	1	0			0	1	0	0	0	0	0		0	0	0	0	0	0	0	0	1	0		0	0	1	0	0	0
74	TUC	Makareo-Mariusa	1	0	1	0	1	1	0	0	2	0	0	0			0	1	0	0	0	0	0		0	0	0	0	0	0	0	0	1	0		0	0	1	0	0	0
75	TUC	Makareo-Mariusa	1	0	1	0	0	0	0	0	1	0	1	0			0	1	0	0	0	0	0		0	0	0	0	0	0	0	0	0	1		0	0	1	0	0	0
76	TUC	Makareo-Mariusa	1	0	1	0	0	0	0	0	1	0	0	0			0	1	0	0	0	0	0		0	0	0	0	0	0	0	0	0	1		0	0	1	0	0	0
77	TUC	Makareo-Mariusa	1	0	1	0	0	0	0	0	1	0	1	0			0	1	0	0	0	0	0		0	0	0	0	0	0	0	0	0	1		0	0	1	0	0	0
78	TUC	Makareo-Mariusa	1	0	1	0	0	0	0	0	1	0	0	0			0	1	0	0	0	0	0		0	0	0	0	0	0	0	0	0	1		0	0	1	0	0	0
79	TUC	Makareo-Mariusa	1	0	1	0	0	0	0	0	1	0	0	0			0	0	0	0	0	0	1		0	0	0	0	0	0	1	0	0	0		0	0	1	0	0	0
80	TUC	Makareo-Mariusa	1	0	1	0	0	0	0	0	1	0	0	0			0	0	0	0	0	0	1		0	0	0	0	0	0	1	0	0	0		0	0	1	0	0	0
81	TUC	Makareo-Mariusa	1	0	1	0	0	0	0	0	1	0	0	0			0	0	0	0	0	0	1		0	0	0	0	0	0	1	0	0	0		0	0	1	0	0	0
82	TUC	Makareo-Mariusa	1	0	1	0	0	0	0	0	1	0	1	0			0	0	0	0	0	0	1		0	0	0	0	0	0	1	0	0	0		0	0	1	0	0	0
83	TUC	Makareo-Mariusa	1	0	1	0	0	0	0	0	1	0	0	0			0	0	0	0	0	0	1		0	0	0	0	0	0	1	0	0	0		0	0	1	0	0	0
84	TUC	Makareo-Mariusa	1	0	1	0	0	0	0	0	1	0	1	0			0	0	0	0	0	0	1		0	0	0	0	0	0	1	0	0	0		0	0	1	0	0	0
85	TUC	Makareo-Mariusa	1	0	1	0	0	0	1	0	2	0	0	0			0	0	0	0	0	1	0		0	0	0	0	0	0	1	0	0	0		0	0	1	0	0	0
86	TUC	Makareo-Mariusa	1	0	1	0	0	0	1	0	2	0	1	0			0	0	0	0	0	1	0		0	0	0	0	0	0	1	0	0	0		0	0	1	0	0	0
87	TUC	Makareo-Mariusa	0	1	1	0	1	1	1	1	4	1	0	1			0	1	0	0	0	1	0		0	0	0	0	0	1	0	0	1	0		0	0	0	1	0	0
88	TUC	Makareo-Mariusa	0	1	1	0	0	0	0	1	2	0	0	0			0	1	0	0	0	0	0		0	0	0	0	0	1	0	0	0	0		0	0	0	1	0	0
89	TUC	Makareo-Mariusa	1	0	1	0	0	0	0	0	1	0	0	0			0	1	0	0	0	0	0		0	0	0	0	0	1	0	0	0	0		0	0	1	0	0	0
90	TUC	Makareo-Mariusa	1	0	1	0	0	0	0	0	1	0	0	0			0	1	0	0	0	0	0		0	0	0	0	0	1	0	0	0	0		0	0	1	0	0	0
91	TUC	Makareo-Mariusa	1	0	1	0	0	0	0	0	1	0	0	0			0	1	0	0	0	0	0		0	0	0	1	0	0	0	0	0	0		0	0	1	0	0	0
6	TUC	Alto Delta	0	0	0	0	0	0	0	1	1	0	1	0			0	1	0	0	0	0	0		0	0	0	1	0	0	0	0	0	0		0	1	0	0	0	0
7	TUC	Alto Delta	0	0	0	0	0	0	0	1	1	0	1	0			0	1	0	0	0	0	0		0	0	0	0	0	1	0	0	0	0		0	1	0	0	0	0
8	TUC	Alto Delta	0	0	0	0	0	0	0	1	1	0	1	0			0	1	0	0	0	0	0		0	0	0	0	0	1	0	0	0	0		0	1	0	0	0	0
9	TUC	Alto Delta	0	0	0	0	0	0	0	0	0	0	1	0			0	1	0	0	0	0	0		0	0	0	0	0	1	0	0	0	0		0	1	0	0	0	0
10	TUC	Alto Delta	0	0	0	0	0	0	0	1	1	0	1	0			0	1	0	0	0	0	0		0	0	0	0	0	1	0	0	0	0		0	1	0	0	0	0
11	TUC	Alto Delta	0	0	0	0	0	0	0	1	1	0	1	0			0	1	0	0	0	0	0		0	0	0	0	0	1	0	0	0	0		0	1	0	0	0	0
12	TUC	Alto Delta	0	0	0	0	0	0	0	1	1	0	1	0			0	1	0	0	0	0	0		0	0	0	0	0	0	1	0	0	0		0	1	0	0	0	0
22	TUC	Alto Delta	0	0	0	0	0	0	0	0	0	0	1	0			0	0	0	0	0	0	1		0	1	0	0	0	0	0	0	0	0		0	1	0	0	0	0
23	TUC	Alto Delta	0	0	0	0	0	0	0	0	0	0	1	0			0	0	0	0	0	0	1		0	1	0	0	0	0	0	0	0	0		0	1	0	0	0	0
24	TUC	Alto Delta	0	0	0	0	0	0	0	0	0	0	0	0			0	0	0	0	0	0	1		0	1	0	0	0	0	0	0	0	0		0	1	0	0	0	0
25	TUC	Alto Delta	0	0	0	0	0	0	0	0	0	0	1	0			0	0	0	0	0	0	1		0	1	0	0	0	0	0	0	0	0		0	1	0	0	0	0
26	TUC	Alto Delta	0	0	0	0	0	0	0	0	0	0	1	0			0	0	0	0	0	0	1		0	1	0	0	0	0	0	0	0	0		0	1	0	0	0	0
27	TUC	Alto Delta	0	0	0	0	0	0	0	0	0	0	1	0			0	0	0	0	0	0	1		0	1	0	0	0	0	0	0	0	0		0	1	0	0	0	0
28	TUC	Alto Delta	0	0	0	0	0	0	0	0	0	0	1	0			0	0	0	0	0	0	1		0	1	0	0	0	0	0	0	0	0		0	1	0	0	0	0
29	TUC	Alto Delta	0	0	0	0	0	0	0	0	0	0	1	0			0	0	0	0	0	0	1		0	1	0	0	0	0	0	0	0	0		0	1	0	0	0	0
30	TUC	Alto Delta	0	0	0	0	0	0	0	0	0	0	1	0			0	0	0	0	0	0	1		0	1	0	0	0	0	0	0	0	0		0	1	0	0	0	0
45	TUC	Alto Delta	0	0	0	0	0	0	0	0	0	0	1	0			0	1	0	0	0	0	0		0	0	0	0	0	1	0	0	0	0		0	1	0	0	0	0
46	TUC	Alto Delta	0	0	0	0	0	0	1	1	2	0	1	0			0	0	0	0	0	1	0		0	0	0	0	0	1	0	0	0	0		0	0	0	0	0	1
47	TUC	Alto Delta	0	0	0	0	0	0	1	1	2	0	1	0			0	0	0	0	0	1	0		0	0	0	0	0	1	0	0	0	0		0	0	0	0	0	1
48	TUC	Alto Delta	0	0	0	0	0	0	1	1	2	0	1	0			0	0	0	0	0	1	0		0	0	0	0	0	1	0	0	0	0		0	0	0	0	0	1
49	TUC	Alto Delta	0	0	0	0	0	0	0	1	1	0	1	0			0	1	0	0	0	0	0		0	0	0	1	0	0	0	0	0	0		0	0	0	0	0	1
50	TUC	Alto Delta	0	0	0	0	1	1	0	1	2	0	1	0			0	1	0	0	0	0	0		0	0	0	1	0	0	0	0	1	0		0	0	0	0	0	1
51	TUC	Alto Delta	1	0	1	0	1	1	0	1	3	0	1	0			0	1	0	0	0	0	0		0	0	0	0	0	0	0	0	1	0		0	0	1	0	0	0
52	TUC	Alto Delta	0	0	0	0	0	0	0	0	0	0	1	0			0	1	0	0	0	0	0		0	0	0	0	0	1	0	0	0	0		0	1	0	0	0	0
53	TUC	Alto Delta	0	0	0	0	0	0	1	1	2	0	0	0			0	0	0	0	0	1	0		0	0	0	0	0	1	0	0	0	0		0	0	0	0	0	1
54	TUC	Alto Delta	0	0	0	0	0	0	0	1	1	0	1	0			0	1	0	0	0	0	0		0	0	0	0	0	1	0	0	0	0		0	0	0	0	0	1
55	TUC	Alto Delta	0	0	0	0	0	0	0	1	1	0	1	0			0	1	0	0	0	0	0		0	0	0	0	0	1	0	0	0	0		0	0	0	0	0	1
56	TUC	Alto Delta	0	0	0	0	0	0	0	1	1	0	1	0			0	1	0	0	0	0	0		0	0	0	0	0	1	0	0	0	0		0	0	0	0	0	1
57	TUC	Alto Delta	0	0	0	0	1	1	0	1	2	0	1	0			0	1	0	0	0	0	0		0	0	0	0	0	0	0	0	1	0		0	0	0	0	0	1
58	TUC	Alto Delta	1	0	1	0	0	0	0	1	2	0	1	0			0	1	0	0	0	0	0		0	0	0	1	0	0	0	0	0	0		0	0	1	0	0	0
59	TUC	Alto Delta	0	0	0	0	0	0	0	1	1	0	1	0			0	1	0	0	0	0	0		0	0	0	0	0	1	0	0	0	0		0	1	0	0	0	0
60	TUC	Alto Delta	0	0	0	0	0	0	0	1	1	0	1	0			0	1	0	0	0	0	0		0	0	0	0	0	1	0	0	0	0		0	1	0	0	0	0
61	TUC	Alto Delta	0	0	0	0	0	0	0	1	1	0	1	0			0	1	0	0	0	0	0		0	0	0	0	0	1	0	0	0	0		0	0	0	0	0	1
62	TUC	Alto Delta	0	0	0	0	0	0	0	1	1	0	1	0			0	1	0	0	0	0	0		0	0	0	1	0	0	0	0	0	0		0	0	0	0	0	1
63	TUC	Alto Delta	0	0	0	0	0	0	0	1	1	0	1	0			0	1	0	0	0	0	0		0	0	0	1	0	0	0	0	0	0		0	0	0	0	0	1
64	TUC	Alto Delta	0	0	0	0	0	0	0	1	1	0	1	0			0	1	0	0	0	0	0		0	0	0	0	0	1	0	0	0	0		0	0	0	0	0	1
65	TUC	Alto Delta	0	0	0	0	0	0	0	1	1	0	1	0			0	1	0	0	0	0	0		0	0	0	0	0	1	0	0	0	0		0	0	0	0	0	1
66	TUC	Alto Delta	0	0	0	0	0	0	0	1	1	0	1	0			0	1	0	0	0	0	0		0	0	0	1	0	0	0	0	0	0		0	0	0	0	0	1
500	TUC	Alto Delta	1	0	1	0	0	0	0	1	2	0	1	0			0	1	0	0	0	0	0		0	0	0	0	0	0	1	0	0	0		0	0	1	0	0	0
1	AD	Guayo	1	0	1	1	0	1	1	0	3	0	0	0			0	0	0	0	0	1	0		0	0	0	0	0	0	0	1	0	0		0	0	1	0	0	0
2	AD	Guayo	0	1	1	0	1	1	1	0	3	0	0	0			0	0	0	0	0	1	0		0	0	0	0	0	0	0	0	1	0		0	0	0	1	0	0
6	AD	Guayo	0	1	1	0	0	0	0	0	1	0	1	0			0	1	0	0	0	0	0		0	0	0	0	0	0	0	0	0	1		0	0	0	1	0	0
7	AD	Guayo	0	1	1	0	1	1	0	0	2	0	1	0			0	1	0	0	0	0	0		0	0	0	0	0	0	0	0	1	0		0	0	0	1	0	0
8	AD	Guayo	0	1	1	0	1	1	1	0	3	0	0	0			0	0	0	0	0	1	0		0	0	0	0	0	0	0	0	1	0		0	0	0	1	0	0
9	AD	Guayo	1	0	1	0	1	1	1	0	3	0	0	0			0	0	0	0	0	1	0		0	0	0	0	0	0	0	0	1	0		0	0	1	0	0	0
13	AD	Guayo	0	1	1	0	1	1	1	1	4	1	0	1			0	0	0	0	0	1	0		0	0	0	0	0	0	0	0	1	0		0	0	0	1	0	0
14	AD	Guayo	0	1	1	0	0	0	1	1	3	0	0	0			0	0	0	0	0	1	0		0	0	0	0	0	0	1	0	0	0		0	0	0	1	0	0
15	AD	Guayo	0	1	1	0	0	0	1	0	2	0	1	0			0	0	0	0	0	1	0		0	0	0	0	0	0	1	0	0	0		0	0	0	1	0	0
16	AD	Guayo	0	1	1	1	0	1	1	0	3	0	1	0			0	0	0	0	0	1	0		0	0	0	0	0	0	0	1	0	0		0	0	0	1	0	0
17	AD	Guayo	0	1	1	0	1	1	1	1	4	1	0	1			0	0	0	0	0	1	0		0	0	0	0	0	0	0	0	1	0		0	0	0	1	0	0
18	AD	Guayo	0	1	1	0	1	1	1	1	4	1	1	0			0	0	0	0	0	1	0		0	0	0	0	0	0	0	0	1	0		0	0	0	1	0	0
19	AD	Guayo	0	1	1	0	1	1	1	1	4	1	0	1			0	0	0	0	0	1	0		0	0	0	0	0	0	0	0	1	0		0	0	0	1	0	0
20	AD	Guayo	0	1	1	0	0	0	1	1	3	0	0	0			0	0	0	0	0	1	0		0	0	0	0	0	0	1	0	0	0		0	0	0	1	0	0
21	AD	Guayo	0	1	1	0	1	1	1	0	3	0	0	0			0	0	0	0	0	1	0		0	0	0	0	0	0	0	0	1	0		0	0	0	1	0	0
22	AD	Guayo	0	1	1	0	1	1	1	0	3	0	0	0			0	0	0	0	0	1	0		0	0	0	0	0	0	0	0	1	0		0	0	0	1	0	0
23	AD	Guayo	0	1	1	0	0	0	1	0	2	0	0	0			0	0	0	0	0	1	0		0	0	0	0	0	0	0	0	0	1		0	0	0	1	0	0
24	AD	Guayo	0	1	1	0	0	0	1	0	2	0	0	0			0	0	0	0	0	1	0		0	0	0	0	0	0	0	0	0	1		0	0	0	1	0	0
25	AD	Guayo	0	1	1	0	1	1	1	1	4	1	0	1			0	0	0	0	0	1	0		0	0	0	0	0	0	0	0	1	0		0	0	0	1	0	0
29	AD	Guayo	0	1	1	0	0	0	1	0	2	0	1	0			0	0	0	0	0	1	0		0	0	0	0	0	0	0	0	0	1		0	0	0	1	0	0
30	AD	Guayo	0	1	1	0	0	0	1	0	2	0	1	0			0	0	0	0	0	1	0		0	0	0	0	0	0	0	0	0	1		0	0	0	1	0	0
31	AD	Guayo	1	0	1	1	0	1	1	1	4	1	0	1			0	0	0	0	0	1	0		0	0	0	0	0	0	0	1	0	0		0	0	1	0	0	0
35	AD	Guayo	0	1	1	0	0	0	1	0	2	0	0	0			0	0	0	0	0	1	0		0	0	0	0	0	0	0	0	0	1		0	0	0	1	0	0
36	AD	Guayo	0	1	1	0	0	0	1	0	2	0	1	0			0	0	0	0	0	1	0		0	0	0	0	0	0	0	0	0	1		0	0	0	1	0	0
37	AD	Guayo	0	1	1	0	0	0	1	0	2	0	1	0			0	0	0	0	0	1	0		0	0	0	0	0	0	0	0	0	1		0	0	0	1	0	0
41	AD	Guayo	0	1	1	0	0	0	1	0	2	0	1	0			0	0	0	0	0	1	0		0	0	0	0	0	0	0	0	0	1		0	0	0	1	0	0
42	AD	Guayo	0	1	1	0	0	0	1	0	2	0	1	0			0	0	0	0	0	1	0		0	0	0	0	0	0	0	0	0	1		0	0	0	1	0	0
43	AD	Guayo	0	1	1	0	0	0	0	0	1	0	1	0			0	1	0	0	0	0	0		0	0	0	0	0	0	1	0	0	0		0	0	0	1	0	0
44	AD	Guayo	1	0	1	0	0	0	1	1	3	0	0	0			0	0	0	0	0	1	0		0	0	0	1	0	0	0	0	0	0		0	0	1	0	0	0
45	AD	Guayo	0	1	1	0	0	0	1	0	2	0	1	0			0	0	0	0	0	1	0		0	0	0	0	0	0	1	0	0	0		0	0	0	1	0	0
46	AD	Guayo	1	0	1	0	0	0	1	1	3	0	1	0			0	0	0	0	0	1	0		0	0	0	0	0	0	0	0	0	1		0	0	1	0	0	0
47	AD	Guayo	0	1	1	0	0	0	1	0	2	0	1	0			0	0	0	0	0	1	0		0	0	0	0	0	0	1	0	0	0		0	0	0	1	0	0
48	AD	Guayo	0	1	1	0	1	1	1	0	3	0	0	0			0	0	0	0	0	1	0		0	0	0	0	0	0	0	0	1	0		0	0	0	1	0	0
49	AD	Guayo	0	1	1	0	0	0	1	0	2	0	0	0			0	0	0	0	0	1	0		0	0	0	0	0	0	1	0	0	0		0	0	0	1	0	0
50	AD	Guayo	0	1	1	0	0	0	1	1	3	0	0	0			0	0	0	0	0	1	0		0	0	0	0	0	0	0	0	0	1		0	0	0	1	0	0
51	AD	Guayo	0	1	1	0	1	1	1	0	3	0	0	0			0	0	0	0	0	1	0		0	0	0	0	0	0	0	0	1	0		0	0	0	1	0	0
52	AD	Guayo	0	1	1	0	1	1	1	1	4	1	0	1			0	0	0	0	0	1	0		0	0	0	0	0	0	0	0	1	0		0	0	0	1	0	0
56	AD	Guayo	1	0	1	1	0	1	1	0	3	0	0	0			0	0	0	0	0	1	0		0	0	0	0	0	0	0	1	0	0		0	0	1	0	0	0
57	AD	Guayo	1	0	1	1	0	1	1	0	3	0	0	0			0	0	0	0	0	1	0		0	0	0	0	0	0	0	1	0	0		0	0	1	0	0	0
58	AD	Guayo	1	0	1	1	0	1	1	0	3	0	0	0			0	0	0	0	0	1	0		0	0	0	0	0	0	0	1	0	0		0	0	1	0	0	0
71	AD	Guayo	1	0	1	0	1	1	1	1	4	1	0	1			0	0	0	0	0	1	0		0	0	0	0	0	0	0	0	1	0		0	0	1	0	0	0
72	AD	Guayo	1	0	1	1	0	1	1	1	4	1	0	1			0	0	0	0	0	1	0		0	0	0	0	0	0	0	1	0	0		0	0	1	0	0	0
73	AD	Guayo	1	0	1	1	0	1	1	1	4	1	0	1			0	0	0	0	0	1	0		0	0	0	0	0	0	0	1	0	0		0	0	1	0	0	0
74	AD	Guayo	1	0	1	1	0	1	1	1	4	1	0	1			0	0	0	0	0	1	0		0	0	0	0	0	0	0	1	0	0		0	0	1	0	0	0
75	AD	Guayo	1	0	1	0	0	0	1	0	2	0	1	0			0	0	0	0	0	1	0		0	0	0	0	0	0	1	0	0	0		0	0	1	0	0	0
76	AD	Guayo	0	1	1	0	0	0	1	1	3	0	0	0			0	0	0	0	0	1	0		0	0	0	0	0	0	0	0	0	1		0	0	0	1	0	0
77	AD	Guayo	0	1	1	0	0	0	1	0	2	0	0	0			0	0	0	0	0	1	0		0	0	0	0	0	0	1	0	0	0		0	0	0	1	0	0
78	AD	Guayo	0	1	1	0	0	0	1	0	2	0	0	0			0	0	0	0	0	1	0		0	0	0	0	0	0	1	0	0	0		0	0	0	1	0	0
79	AD	Guayo	0	1	1	0	1	1	1	1	4	1	1	0			0	0	0	0	0	1	0		0	0	0	0	0	0	0	0	1	0		0	0	0	1	0	0
80	AD	Guayo	0	1	1	0	1	1	1	1	4	1	1	0			0	0	0	0	0	1	0		0	0	0	0	0	0	0	0	1	0		0	0	0	1	0	0
81	AD	Guayo	0	1	1	0	1	1	1	0	3	0	1	0			0	0	0	0	0	1	0		0	0	0	0	0	0	0	0	1	0		0	0	0	1	0	0
82	AD	Guayo	0	1	1	0	1	1	1	1	4	1	1	0			0	0	0	0	0	1	0		0	0	0	0	0	0	0	0	1	0		0	0	0	1	0	0
83	AD	Guayo	0	1	1	0	1	1	1	0	3	0	1	0			0	0	0	0	0	1	0		0	0	0	0	0	0	0	0	1	0		0	0	0	1	0	0
84	AD	Guayo	1	0	1	0	1	1	1	0	3	0	1	0			0	0	0	0	0	1	0		0	0	0	0	0	0	0	0	1	0		0	0	1	0	0	0
85	AD	Guayo	1	0	1	0	1	1	1	0	3	0	1	0			0	0	0	0	0	1	0		0	0	0	0	0	0	0	0	1	0		0	0	1	0	0	0
86	AD	Guayo	1	0	1	0	1	1	1	0	3	0	1	0			0	0	0	0	0	1	0		0	0	0	0	0	0	0	0	1	0		0	0	1	0	0	0
87	AD	Guayo	0	1	1	1	0	1	1	0	3	0	1	0			0	0	0	0	0	1	0		0	0	0	0	0	0	0	1	0	0		0	0	0	1	0	0
88	AD	Guayo	0	1	1	0	0	0	1	1	3	0	1	0			0	0	0	0	0	1	0		0	0	0	0	0	0	0	0	0	1		0	0	0	1	0	0
89	AD	Guayo	0	1	1	0	0	0	1	1	3	0	0	0			0	0	0	0	0	1	0		0	0	0	0	0	0	0	0	0	1		0	0	0	1	0	0
90	AD	Guayo	0	1	1	0	0	0	1	1	3	0	1	0			0	0	0	0	0	1	0		0	0	0	0	0	0	0	0	0	1		0	0	0	1	0	0
91	AD	Guayo	0	1	1	0	0	0	1	0	2	0	0	0			0	0	0	0	0	1	0		0	0	0	0	0	0	1	0	0	0		0	0	0	1	0	0
92	AD	Guayo	0	1	1	0	0	0	1	0	2	0	0	0			0	0	0	0	0	1	0		0	0	0	0	0	0	0	0	0	1		0	0	0	1	0	0
93	AD	Guayo	0	1	1	0	0	0	1	0	2	0	1	0			0	0	0	0	0	1	0		0	0	0	0	0	0	1	0	0	0		0	0	0	1	0	0
94	AD	Guayo	0	1	1	0	0	0	1	1	3	0	0	0			0	0	0	0	0	1	0		0	0	0	0	0	0	0	0	0	1		0	0	0	1	0	0
95	AD	Guayo	0	1	1	0	0	0	1	0	2	0	0	0			0	0	0	0	0	1	0		0	0	0	1	0	0	0	0	0	0		0	0	0	1	0	0
96	AD	Guayo	0	1	1	0	0	0	1	0	2	0	0	0			0	0	0	0	0	1	0		0	0	0	1	0	0	0	0	0	0		0	0	0	1	0	0
97	AD	Guayo	0	1	1	0	1	1	1	1	4	1	0	1			0	0	0	0	0	1	0		0	0	0	0	0	0	0	0	1	0		0	0	0	1	0	0
98	AD	Guayo	0	1	1	0	1	1	1	1	4	1	0	1			0	0	0	0	0	1	0		0	0	0	0	0	0	0	0	1	0		0	0	0	1	0	0
104	AD	Guayo	1	0	1	0	1	1	1	1	4	1	0	1			0	0	0	0	0	1	0		0	0	0	0	0	0	0	0	1	0		0	0	1	0	0	0
105	AD	Guayo	1	0	1	0	1	1	1	1	4	1	0	1			0	0	0	0	0	1	0		0	0	0	0	0	0	0	0	1	0		0	0	1	0	0	0
106	AD	Guayo	1	0	1	0	0	0	1	1	3	0	0	0			0	0	0	0	0	1	0		0	0	0	0	0	0	0	0	0	1		0	0	1	0	0	0
107	AD	Guayo	1	0	1	0	0	0	1	1	3	0	0	0			0	0	0	0	0	1	0		0	0	0	0	0	0	0	0	0	1		0	0	1	0	0	0
108	AD	Guayo	1	0	1	0	1	1	1	0	3	0	0	0			0	0	0	0	0	1	0		0	0	0	0	0	0	0	0	1	0		0	0	1	0	0	0
109	AD	Guayo	0	1	1	0	0	0	1	1	3	0	0	0			0	0	0	0	0	1	0		0	0	0	0	0	0	1	0	0	0		0	0	0	1	0	0
110	AD	Guayo	0	1	1	0	1	1	1	1	4	1	1	0			0	0	0	0	0	1	0		0	0	0	0	0	0	0	0	1	0		0	0	0	1	0	0
111	AD	Guayo	0	1	1	0	0	0	1	1	3	0	1	0			0	0	0	0	0	1	0		0	0	0	0	0	0	1	0	0	0		0	0	0	1	0	0
112	AD	Guayo	1	0	1	0	1	1	1	1	4	1	1	0			0	0	0	0	0	1	0		0	0	0	0	0	0	0	0	1	0		0	0	1	0	0	0
113	AD	Guayo	0	1	1	0	0	0	1	1	3	0	0	0			0	0	0	0	0	1	0		0	0	0	0	0	0	1	0	0	0		0	0	0	1	0	0
114	AD	Guayo	0	1	1	0	0	0	1	0	2	0	1	0			0	0	0	0	0	1	0		0	0	0	0	0	0	1	0	0	0		0	0	0	1	0	0
115	AD	Guayo	0	1	1	0	0	0	1	0	2	0	1	0			0	0	0	0	0	1	0		0	0	0	0	0	0	1	0	0	0		0	0	0	1	0	0
116	AD	Guayo	0	1	1	0	0	0	1	0	2	0	1	0			0	0	0	0	0	1	0		0	0	0	0	0	0	1	0	0	0		0	0	0	1	0	0
117	AD	Guayo	0	1	1	0	0	0	1	0	2	0	1	0			0	0	0	0	0	1	0		0	0	0	0	0	0	1	0	0	0		0	0	0	1	0	0
118	AD	Guayo	0	1	1	0	0	0	1	0	2	0	1	0			0	0	0	0	0	1	0		0	0	0	0	0	0	1	0	0	0		0	0	0	1	0	0
119	AD	Guayo	0	1	1	0	1	1	1	0	3	0	1	0			0	0	0	0	0	1	0		0	0	0	0	0	0	0	0	1	0		0	0	0	1	0	0
120	AD	Guayo	0	1	1	0	1	1	1	1	4	1	1	0			0	0	0	0	0	1	0		0	0	0	0	0	0	0	0	1	0		0	0	0	1	0	0
121	AD	Guayo	0	1	1	0	1	1	1	1	4	1	1	0			0	0	0	0	0	1	0		0	0	0	0	0	0	0	0	1	0		0	0	0	1	0	0
122	AD	Guayo	0	1	1	0	0	0	1	1	3	0	1	0			0	0	0	0	0	1	0		0	0	0	0	0	0	1	0	0	0		0	0	0	1	0	0
123	AD	Guayo	0	1	1	0	0	0	1	1	3	0	1	0			0	0	0	0	0	1	0		0	0	0	0	0	0	1	0	0	0		0	0	0	1	0	0
124	AD	Guayo	0	1	1	0	0	0	1	0	2	0	0	0			0	0	0	0	0	1	0		0	0	0	0	0	0	1	0	0	0		0	0	0	1	0	0
125	AD	Guayo	0	1	1	0	0	0	1	0	2	0	1	0			0	0	0	0	0	1	0		0	0	0	0	0	0	1	0	0	0		0	0	0	1	0	0
126	AD	Guayo	0	1	1	0	0	0	1	0	2	0	1	0			0	0	0	0	0	1	0		0	0	0	0	0	0	1	0	0	0		0	0	0	1	0	0
127	AD	Guayo	0	1	1	0	0	0	1	0	2	0	1	0			0	0	0	0	0	1	0		0	0	0	0	0	0	1	0	0	0		0	0	0	1	0	0
128	AD	Guayo	0	1	1	0	1	1	1	1	4	1	1	0			0	0	0	0	0	1	0		0	0	0	0	0	0	0	0	1	0		0	0	0	1	0	0
129	AD	Guayo	0	1	1	0	0	0	1	1	3	0	1	0			0	0	0	0	0	1	0		0	0	0	0	0	0	1	0	0	0		0	0	0	1	0	0
130	AD	Guayo	0	1	1	0	1	1	1	0	3	0	1	0			0	0	0	0	0	1	0		0	0	0	0	0	0	0	0	1	0		0	0	0	1	0	0
131	AD	Guayo	0	1	1	0	0	0	1	0	2	0	1	0			0	0	0	0	0	1	0		0	0	0	0	0	0	1	0	0	0		0	0	0	1	0	0
132	AD	Guayo	0	1	1	0	0	0	1	1	3	0	1	0			0	0	0	0	0	1	0		0	0	0	0	0	0	1	0	0	0		0	0	0	1	0	0
133	AD	Guayo	0	1	1	0	0	0	1	1	3	0	1	0			0	0	0	0	0	1	0		0	0	0	0	0	0	1	0	0	0		0	0	0	1	0	0
139	AD	Guayo	0	1	1	0	0	0	1	0	2	0	0	0			0	0	0	0	0	1	0		0	0	0	0	0	0	1	0	0	0		0	0	0	1	0	0
140	AD	Guayo	0	1	1	0	0	0	1	1	3	0	0	0			0	0	0	0	0	1	0		0	0	0	0	0	0	1	0	0	0		0	0	0	1	0	0
141	AD	Guayo	0	1	1	1	0	1	1	0	3	0	0	0			0	0	0	0	0	1	0		0	0	0	0	0	0	0	1	0	0		0	0	0	1	0	0
142	AD	Guayo	0	1	1	1	0	1	1	0	3	0	0	0			0	0	0	0	0	1	0		0	0	0	0	0	0	0	1	0	0		0	0	0	1	0	0
143	AD	Guayo	0	1	1	1	0	1	1	0	3	0	0	0			0	0	0	0	0	1	0		0	0	0	0	0	0	0	1	0	0		0	0	0	1	0	0
144	AD	Guayo	0	1	1	0	1	1	1	0	3	0	1	0			0	0	0	0	0	1	0		0	0	0	0	0	0	0	0	1	0		0	0	0	1	0	0
145	AD	Guayo	0	1	1	0	1	1	1	1	4	1	1	0			0	0	0	0	0	1	0		0	0	0	0	0	0	0	0	1	0		0	0	0	1	0	0
146	AD	Guayo	0	1	1	0	1	1	1	1	4	1	1	0			0	0	0	0	0	1	0		0	0	0	0	0	0	0	0	1	0		0	0	0	1	0	0
147	AD	Guayo	0	1	1	0	1	1	1	0	3	0	1	0			0	0	0	0	0	1	0		0	0	0	0	0	0	0	0	1	0		0	0	0	1	0	0
148	AD	Guayo	0	1	1	0	1	1	1	1	4	1	1	0			0	0	0	0	0	1	0		0	0	0	0	0	0	0	0	1	0		0	0	0	1	0	0
154	AD	Guayo	0	1	1	0	0	0	1	0	2	0	1	0			0	0	0	0	0	1	0		0	0	0	0	0	0	1	0	0	0		0	0	0	1	0	0
155	AD	Guayo	0	1	1	0	0	0	1	0	2	0	0	0			0	0	0	0	0	1	0		0	0	0	0	0	0	1	0	0	0		0	0	0	1	0	0
156	AD	Guayo	0	1	1	0	0	0	1	0	2	0	0	0			0	0	0	0	0	1	0		0	0	0	0	0	0	1	0	0	0		0	0	0	1	0	0
157	AD	Guayo	0	1	1	0	0	0	1	0	2	0	0	0			0	0	0	0	0	1	0		0	0	0	0	0	0	1	0	0	0		0	0	0	1	0	0
158	AD	Guayo	0	1	1	0	0	0	1	1	3	0	1	0			0	0	0	0	0	1	0		0	0	0	0	0	0	1	0	0	0		0	0	0	1	0	0
159	AD	Guayo	0	1	1	0	0	0	1	1	3	0	1	0			0	0	0	0	0	1	0		0	0	0	0	0	0	1	0	0	0		0	0	0	1	0	0
160	AD	Guayo	0	1	1	1	0	1	1	0	3	0	1	0			0	0	0	0	0	1	0		0	0	0	0	0	0	0	1	0	1		0	0	0	1	0	0
161	AD	Guayo	0	1	1	1	0	1	1	0	3	0	0	0			0	0	0	0	0	1	0		0	0	0	0	0	0	0	1	0	0		0	0	0	1	0	0
162	AD	Guayo	0	1	1	1	0	1	1	1	4	1	1	0			0	0	0	0	0	1	0		0	0	0	0	0	0	0	1	0	1		0	0	0	1	0	0
163	AD	Guayo	1	0	1	0	1	1	1	1	4	1	0	1			0	0	0	0	0	1	0		0	0	0	0	0	0	0	0	1	0		0	0	1	0	0	0
164	AD	Guayo	0	1	1	1	1	2	1	1	5	1	1	0			0	0	0	0	0	1	0		0	0	0	0	0	0	0	1	1	0		0	0	0	1	0	0
165	AD	Guayo	0	1	1	1	0	1	1	1	4	1	0	1			0	0	0	0	0	1	0		0	0	0	0	0	0	0	1	0	0		0	0	0	1	0	0
166	AD	Guayo	0	1	1	0	1	1	1	1	4	1	0	1			0	0	0	0	0	1	0		0	0	0	0	0	0	0	0	1	0		0	0	0	1	0	0
167	AD	Guayo	1	0	1	0	0	0	1	0	2	0	1	0			0	0	0	0	0	1	0		0	0	0	0	0	0	1	0	0	0		0	0	1	0	0	0
168	AD	Guayo	0	1	1	0	1	1	1	0	3	0	0	0			0	0	0	0	0	1	0		0	0	0	0	0	0	0	0	1	0		0	0	0	1	0	0
169	AD	Guayo	0	1	1	0	1	1	1	1	4	1	0	1			0	0	0	0	0	1	0		0	0	0	0	0	0	0	0	1	0		0	0	0	1	0	0
170	AD	Guayo	1	0	1	0	0	0	1	0	2	0	1	0			0	0	0	0	0	1	0		0	0	0	0	0	0	1	0	0	0		0	0	1	0	0	0
171	AD	Guayo	0	1	1	1	0	1	1	1	4	1	0	1			0	0	0	0	0	1	0		0	0	0	0	0	0	0	1	0	0		0	0	0	1	0	0
178	AD	Guayo	0	1	1	0	0	0	1	1	3	0	1	0			0	0	0	0	0	1	0		0	0	0	0	0	0	0	0	0	1		0	0	0	1	0	0
179	AD	Guayo	0	1	1	0	1	1	1	1	4	1	0	1			0	0	0	0	0	1	0		0	0	0	0	0	0	0	0	1	0		0	0	0	1	0	0
180	AD	Guayo	0	1	1	0	1	1	1	0	3	0	0	0			0	0	0	0	0	1	0		0	0	0	0	0	0	0	0	1	0		0	0	0	1	0	0
181	AD	Guayo	0	1	1	0	0	0	1	0	2	0	1	0			0	0	0	0	0	1	0		0	0	0	0	0	0	1	0	0	0		0	0	0	1	0	0
182	AD	Guayo	0	1	1	0	0	0	1	1	3	0	1	0			0	0	0	0	0	1	0		0	0	0	0	0	0	1	0	0	0		0	0	0	1	0	0
183	AD	Guayo	0	1	1	0	0	0	1	0	2	0	0	0			0	0	0	0	0	1	0		0	0	0	0	0	0	1	0	0	0		0	0	0	1	0	0
184	AD	Guayo	0	1	1	0	0	0	1	1	3	0	0	0			0	0	0	0	0	1	0		0	0	0	0	0	0	1	0	0	0		0	0	0	1	0	0
185	AD	Guayo	0	1	1	1	0	1	1	1	4	1	0	1			0	0	0	0	0	1	0		0	0	0	0	0	0	0	1	0	0		0	0	0	1	0	0
186	AD	Guayo	0	1	1	0	0	0	1	0	2	0	1	0			0	0	0	0	0	1	0		0	0	0	0	0	0	0	0	0	1		0	0	0	1	0	0
187	AD	Guayo	0	1	1	0	0	0	1	0	2	0	1	0			0	0	0	0	0	1	0		0	0	0	0	0	0	0	0	0	1		0	0	0	1	0	0
188	AD	Guayo	0	1	1	1	0	1	1	0	3	0	0	0			0	0	0	0	0	1	0		0	0	0	0	0	0	0	1	0	0		0	0	0	1	0	0
189	AD	Guayo	0	1	1	0	0	0	1	1	3	0	1	0			0	0	0	0	0	1	0		0	0	0	0	0	0	1	0	0	0		0	0	0	1	0	0
190	AD	Guayo	0	1	1	0	1	1	1	1	4	1	1	0			0	0	0	0	0	1	0		0	0	0	0	0	0	0	0	1	0		0	0	0	1	0	0
191	AD	Guayo	0	1	1	0	1	1	1	1	4	1	0	1			0	0	0	0	0	1	0		0	0	0	0	0	0	0	0	1	0		0	0	0	1	0	0
192	AD	Guayo	0	1	1	0	1	1	1	1	4	1	0	1			0	0	0	0	0	1	0		0	0	0	0	0	0	0	0	1	0		0	0	0	1	0	0
193	AD	Guayo	0	1	1	0	1	1	1	1	4	1	0	1			0	0	0	0	0	1	0		0	0	0	0	0	0	0	0	1	0		0	0	0	1	0	0
194	AD	Guayo	0	1	1	0	1	1	1	1	4	1	0	1			0	0	0	0	0	1	0		0	0	0	0	0	0	0	0	1	0		0	0	0	1	0	0
195	AD	Guayo	0	1	1	0	1	1	1	1	4	1	0	1			0	0	0	0	0	1	0		0	0	0	0	0	0	0	0	1	0		0	0	0	1	0	0
196	AD	Guayo	0	1	1	0	1	1	1	0	3	0	0	0			0	0	0	0	0	1	0		0	0	0	0	0	0	0	0	1	0		0	0	0	1	0	0
204	AD	Guayo	0	1	1	0	0	0	1	1	3	0	1	0			0	0	0	0	0	1	0		0	0	0	0	0	0	1	0	0	0		0	0	0	1	0	0
205	AD	Guayo	0	1	1	0	0	0	1	1	3	0	1	0			0	0	0	0	0	1	0		0	0	0	0	0	0	0	0	0	1		0	0	0	1	0	0
206	AD	Guayo	0	1	1	0	0	0	1	1	3	0	0	0			0	0	0	0	0	1	0		0	0	0	0	0	0	1	0	0	0		0	0	0	1	0	0
207	AD	Guayo	0	1	1	0	0	0	1	1	3	0	1	0			0	0	0	0	0	1	0		0	0	0	0	0	0	1	0	0	0		0	0	0	1	0	0
208	AD	Guayo	0	1	1	0	0	0	1	0	2	0	1	0			0	0	0	0	0	1	0		0	0	0	0	0	0	1	0	0	0		0	0	0	1	0	0
209	AD	Guayo	0	1	1	0	0	0	1	1	3	0	1	0			0	0	0	0	0	1	0		0	0	0	0	0	0	0	0	0	1		0	0	0	1	0	0
210	AD	Guayo	0	1	1	0	0	0	1	1	3	0	1	0			0	0	0	0	0	1	0		0	0	0	0	0	0	1	0	0	0		0	0	0	1	0	0
211	AD	Guayo	0	1	1	0	0	0	1	0	2	0	1	0			0	0	0	0	0	1	0		0	0	0	0	0	0	0	0	0	1		0	0	0	1	0	0
212	AD	Guayo	0	1	1	0	0	0	1	0	2	0	0	0			0	0	0	0	0	1	0		0	0	0	0	0	0	0	0	0	1		0	0	0	1	0	0
213	AD	Guayo	0	1	1	0	0	0	1	0	2	0	1	0			0	0	0	0	0	1	0		0	0	0	0	0	0	0	0	0	1		0	0	0	1	0	0
214	AD	Guayo	0	1	1	0	0	0	1	0	2	0	0	0			0	0	0	0	0	1	0		0	0	0	0	0	0	0	0	0	1		0	0	0	1	0	0
215	AD	Guayo	0	1	1	0	1	1	1	1	4	1	1	0			0	0	0	0	0	1	0		0	0	0	0	0	0	0	0	1	0		0	0	0	1	0	0
216	AD	Guayo	0	1	1	0	1	1	1	1	4	1	1	0			0	0	0	0	0	1	0		0	0	0	0	0	0	0	0	1	0		0	0	0	1	0	0
217	AD	Guayo	0	1	1	0	1	1	1	1	4	1	1	0			0	0	0	0	0	1	0		0	0	0	0	0	0	0	0	1	0		0	0	0	1	0	0
226	AD	Guayo	0	1	1	0	0	0	1	1	3	0	1	0			0	0	0	0	0	1	0		0	0	0	0	0	0	1	0	0	0		0	0	0	1	0	0
227	AD	Guayo	0	1	1	0	0	0	0	1	2	0	1	0			0	1	0	0	0	0	0		0	0	0	0	0	0	1	0	0	0		0	0	0	1	0	0
228	AD	Guayo	0	1	1	0	0	0	0	0	1	0	1	0			0	1	0	0	0	0	0		0	0	0	0	0	0	0	0	0	1		0	0	0	1	0	0
229	AD	Guayo	0	1	1	0	0	0	0	1	2	0	1	0			0	1	0	0	0	0	0		0	0	0	0	0	0	0	0	0	1		0	0	0	1	0	0
230	AD	Guayo	0	1	1	0	0	0	0	0	1	0	1	0			0	1	0	0	0	0	0		0	0	0	0	0	0	1	0	0	0		0	0	0	1	0	0
231	AD	Guayo	0	1	1	0	0	0	0	0	1	0	0	0			0	1	0	0	0	0	0		0	0	0	0	0	0	1	0	0	0		0	0	0	1	0	0
232	AD	Guayo	0	1	1	0	0	0	0	0	1	0	0	0			0	1	0	0	0	0	0		0	0	0	0	0	0	0	0	0	1		0	0	0	1	0	0
233	AD	Guayo	0	1	1	0	0	0	1	0	2	0	1	0			0	0	0	0	0	1	0		0	0	0	0	0	0	1	0	0	0		0	0	0	1	0	0
234	AD	Guayo	1	0	1	0	0	0	1	1	3	0	0	0			0	0	0	0	0	1	0		0	0	0	1	0	0	0	0	0	0		0	0	1	0	0	0
235	AD	Guayo	1	0	1	0	0	0	1	1	3	0	0	0			0	0	0	0	0	1	0		0	0	0	1	0	0	0	0	0	0		0	0	1	0	0	0
236	AD	Guayo	0	1	1	0	1	1	1	1	4	1	0	1			0	0	0	0	0	1	0		0	0	0	0	0	0	0	0	1	0		0	0	0	1	0	0
237	AD	Guayo	0	1	1	0	1	1	1	1	4	1	1	0			0	0	0	0	0	1	0		0	0	0	0	0	0	0	0	1	0		0	0	0	1	0	0
238	AD	Guayo	1	0	1	0	1	1	1	1	4	1	0	1			0	0	0	0	0	1	0		0	0	0	0	0	0	0	0	1	0		0	0	1	0	0	0
239	AD	Guayo	0	1	1	0	1	1	1	1	4	1	0	1			0	0	0	0	0	1	0		0	0	0	0	0	0	0	0	1	0		0	0	0	1	0	0
240	AD	Guayo	0	1	1	0	1	1	1	1	4	1	0	1			0	0	0	0	0	1	0		0	0	0	0	0	0	0	0	1	0		0	0	0	1	0	0
241	AD	Guayo	0	1	1	0	1	1	1	1	4	1	0	1			0	0	0	0	0	1	0		0	0	0	0	0	0	0	0	1	0		0	0	0	1	0	0
242	AD	Guayo	0	1	1	0	1	1	1	1	4	1	0	1			0	0	0	0	0	1	0		0	0	0	0	0	0	0	0	1	0		0	0	0	1	0	0
252	AD	Guayo	0	1	1	0	0	0	1	0	2	0	0	0			0	0	0	0	0	1	0		0	0	0	0	0	0	1	0	0	0		0	0	0	1	0	0
253	AD	Guayo	0	1	1	0	0	0	0	0	1	0	0	0			0	1	0	0	0	0	0		0	0	0	0	0	0	1	0	0	0		0	0	0	1	0	0
254	AD	Guayo	0	1	1	0	0	0	0	0	1	0	0	0			0	1	0	0	0	0	0		0	0	0	0	0	0	1	0	0	0		0	0	0	1	0	0
255	AD	Guayo	0	1	1	0	0	0	0	0	1	0	0	0			0	1	0	0	0	0	0		0	0	0	0	0	0	1	0	0	0		0	0	0	1	0	0
256	AD	Guayo	0	1	1	0	0	0	0	0	1	0	0	0			0	1	0	0	0	0	0		0	0	0	0	0	0	1	0	0	0		0	0	0	1	0	0
257	AD	Guayo	0	1	1	0	0	0	1	0	2	0	0	0			0	0	0	0	0	1	0		0	0	0	0	0	0	1	0	0	0		0	0	0	1	0	0
258	AD	Guayo	0	1	1	0	0	0	1	0	2	0	0	0			0	0	0	0	0	1	0		0	0	0	0	0	0	1	0	0	0		0	0	0	1	0	0
259	AD	Guayo	0	1	1	1	0	1	1	0	3	0	0	0			0	0	0	0	0	1	0		0	0	0	0	0	0	0	1	0	0		0	0	0	1	0	0
260	AD	Guayo	0	1	1	0	0	0	0	0	1	0	0	0			0	1	0	0	0	0	0		0	0	0	0	0	0	1	0	0	0		0	0	0	1	0	0
261	AD	Guayo	0	1	1	0	0	0	1	0	2	0	0	0			0	0	0	0	0	1	0		0	0	0	0	0	0	1	0	0	0		0	0	0	1	0	0
262	AD	Guayo	1	0	1	1	0	1	1	0	3	0	0	0			0	0	0	0	0	1	0		0	0	0	0	0	0	0	1	0	0		0	0	1	0	0	0
263	AD	Guayo	1	0	1	1	0	1	1	0	3	0	0	0			0	0	0	0	0	1	0		0	0	0	0	0	0	0	1	0	0		0	0	1	0	0	0
264	AD	Guayo	0	1	1	0	0	0	0	0	1	0	0	0			0	1	0	0	0	0	0		0	0	0	0	0	0	1	0	0	0		0	0	0	1	0	0
265	AD	Guayo	0	1	1	0	0	0	0	0	1	0	0	0			0	1	0	0	0	0	0		0	0	0	0	0	0	0	0	0	1		0	0	0	1	0	0
266	AD	Guayo	0	1	1	0	0	0	0	0	1	0	0	0			0	1	0	0	0	0	0		0	0	0	0	0	0	1	0	0	0		0	0	0	1	0	0
267	AD	Guayo	0	1	1	0	0	0	0	0	1	0	0	0			0	1	0	0	0	0	0		0	0	0	0	0	0	1	0	0	0		0	0	0	1	0	0
268	AD	Guayo	0	1	1	0	0	0	0	0	1	0	0	0			0	1	0	0	0	0	0		0	0	0	0	0	0	1	0	0	0		0	0	0	1	0	0
269	AD	Guayo	0	1	1	0	0	0	0	0	1	0	0	0			0	1	0	0	0	0	0		0	0	0	0	0	0	1	0	0	0		0	0	0	1	0	0
270	AD	Guayo	0	1	1	0	0	0	0	0	1	0	0	0			0	1	0	0	0	0	0		0	0	0	0	0	0	1	0	0	0		0	0	0	1	0	0
271	AD	Guayo	0	1	1	0	0	0	0	0	1	0	0	0			0	1	0	0	0	0	0		0	0	0	0	0	0	1	0	0	0		0	0	0	1	0	0
282	AD	Guayo	0	1	1	0	0	0	1	0	2	0	0	0			0	0	0	0	0	1	0		0	0	0	0	0	0	1	0	0	0		0	0	0	1	0	0
283	AD	Guayo	0	1	1	0	0	0	1	0	2	0	0	0			0	0	0	0	0	1	0		0	0	0	0	0	1	0	0	0	0		0	0	0	1	0	0
284	AD	Guayo	0	1	1	0	0	0	1	1	3	0	1	0			0	0	0	0	0	1	0		0	0	0	0	0	0	1	0	0	0		0	0	0	1	0	0
285	AD	Guayo	0	1	1	0	0	0	1	0	2	0	1	0			0	0	0	0	0	1	0		0	0	0	0	0	0	1	0	0	0		0	0	0	1	0	0
286	AD	Guayo	0	1	1	0	0	0	0	0	1	0	0	0			0	1	0	0	0	0	0		0	0	0	1	0	0	0	0	0	0		0	0	0	1	0	0
287	AD	Guayo	0	1	1	0	1	1	1	1	4	1	1	0			0	0	0	0	0	1	0		0	0	0	0	0	0	0	0	1	0		0	0	0	1	0	0
288	AD	Guayo	0	1	1	0	1	1	1	0	3	0	0	0			0	0	0	0	0	1	0		0	0	0	0	0	0	0	0	1	0		0	0	0	1	0	0
289	AD	Guayo	0	1	1	0	0	0	0	0	1	0	1	0			0	1	0	0	0	0	0		0	0	0	1	0	0	0	0	0	0		0	0	0	1	0	0
290	AD	Guayo	0	1	1	0	1	1	1	0	3	0	0	0			0	0	0	0	0	1	0		0	0	0	0	0	0	0	0	1	0		0	0	0	1	0	0
291	AD	Guayo	0	1	1	0	1	1	1	1	4	1	0	1			0	0	0	0	0	1	0		0	0	0	0	0	0	0	0	1	0		0	0	0	1	0	0
292	AD	Guayo	0	1	1	0	0	0	1	0	2	0	1	0			0	0	0	0	0	1	0		0	0	0	0	0	0	1	0	0	0		0	0	0	1	0	0
304	AD	Guayo	0	1	1	0	0	0	0	0	1	0	1	0			0	1	0	0	0	0	0		0	0	0	0	0	0	1	0	0	0		0	0	0	1	0	0
305	AD	Guayo	0	1	1	1	0	1	1	0	3	0	1	0			0	0	0	0	0	1	0		0	0	0	0	0	0	0	1	0	0		0	0	0	1	0	0
306	AD	Guayo	0	1	1	0	0	0	0	0	1	0	0	0			0	1	0	0	0	0	0		0	0	0	0	0	0	1	0	0	0		0	0	0	1	0	0
307	AD	Guayo	0	1	1	0	0	0	0	0	1	0	1	0			0	1	0	0	0	0	0		0	0	0	0	0	0	1	0	0	0		0	0	0	1	0	0
308	AD	Guayo	0	1	1	0	0	0	1	0	2	0	1	0			0	0	0	0	0	1	0		0	0	0	0	0	0	1	0	0	0		0	0	0	1	0	0
309	AD	Guayo	0	1	1	0	0	0	1	0	2	0	0	0			0	0	0	0	0	1	0		0	0	0	0	0	0	1	0	0	0		0	0	0	1	0	0
310	AD	Guayo	0	1	1	0	0	0	1	0	2	0	0	0			0	0	0	0	0	1	0		0	0	0	0	0	0	1	0	0	0		0	0	0	1	0	0
311	AD	Guayo	0	1	1	0	0	0	1	0	2	0	1	0			0	0	0	0	0	1	0		0	0	0	0	0	0	1	0	0	0		0	0	0	1	0	0
312	AD	Guayo	1	0	1	0	0	0	1	1	3	0	0	0			0	0	0	0	0	1	0		0	0	0	0	0	0	0	0	0	1		0	0	1	0	0	0
313	AD	Guayo	0	1	1	0	0	0	1	0	2	0	1	0			0	0	0	0	0	1	0		0	0	0	0	0	0	0	0	0	1		0	0	0	1	0	0
314	AD	Guayo	0	1	1	0	1	1	1	0	3	0	1	0			0	0	0	0	0	1	0		0	0	0	0	0	0	0	0	1	0		0	0	0	1	0	0
315	AD	Guayo	0	1	1	0	0	0	0	1	2	0	1	0			0	1	0	0	0	0	0		0	0	0	0	0	0	1	0	0	0		0	0	0	1	0	0
316	AD	Guayo	0	1	1	0	0	0	1	1	3	0	1	0			0	0	0	0	0	1	0		0	0	0	0	0	0	1	0	0	0		0	0	0	1	0	0
317	AD	Guayo	0	1	1	0	0	0	0	0	1	0	1	0			0	1	0	0	0	0	0		0	0	0	0	0	0	0	0	0	1		0	0	0	1	0	0
318	AD	Guayo	0	1	1	0	0	0	0	0	1	0	1	0			0	1	0	0	0	0	0		0	0	0	0	0	0	0	0	0	1		0	0	0	1	0	0
319	AD	Guayo	0	1	1	0	0	0	0	1	2	0	1	0			0	1	0	0	0	0	0		0	0	0	0	0	0	0	0	0	1		0	0	0	1	0	0
320	AD	Guayo	0	1	1	0	0	0	1	1	3	0	0	0			0	0	0	0	0	1	0		0	0	0	0	0	0	0	0	0	1		0	0	0	1	0	0
321	AD	Guayo	0	1	1	0	0	0	0	0	1	0	0	0			0	1	0	0	0	0	0		0	0	0	0	0	0	1	0	0	0		0	0	0	1	0	0
322	AD	Guayo	0	1	1	0	0	0	0	0	1	0	1	0			0	1	0	0	0	0	0		0	0	0	0	0	0	1	0	0	0		0	0	0	1	0	0
323	AD	Guayo	0	1	1	0	0	0	0	0	1	0	1	0			0	1	0	0	0	0	0		0	0	0	0	0	0	1	0	0	0		0	0	0	1	0	0
324	AD	Guayo	0	1	1	0	0	0	0	0	1	0	1	0			0	1	0	0	0	0	0		0	0	0	0	0	0	1	0	0	0		0	0	0	1	0	0
325	AD	Guayo	0	1	1	0	0	0	0	0	1	0	1	0			0	1	0	0	0	0	0		0	0	0	0	0	0	1	0	0	0		0	0	0	1	0	0
326	AD	Guayo	0	1	1	0	0	0	0	0	1	0	1	0			0	1	0	0	0	0	0		0	0	0	0	0	0	1	0	0	0		0	0	0	1	0	0
327	AD	Guayo	0	1	1	0	0	0	0	0	1	0	1	0			0	1	0	0	0	0	0		0	0	0	0	0	0	0	0	0	1		0	0	0	1	0	0
328	AD	Guayo	0	1	1	0	0	0	0	0	1	0	1	0			0	1	0	0	0	0	0		0	0	0	0	0	0	1	0	0	0		0	0	0	1	0	0
329	AD	Guayo	0	1	1	0	0	0	0	0	1	0	1	0			0	1	0	0	0	0	0		0	0	0	0	0	0	1	0	0	0		0	0	0	1	0	0
330	AD	Guayo	0	1	1	0	0	0	1	0	2	0	1	0			0	0	0	0	0	1	0		0	0	0	0	0	0	1	0	0	0		0	0	0	1	0	0
380	AD	Guayo	0	1	1	1	0	1	1	0	3	0	0	0			0	0	0	0	0	1	0		0	0	0	0	0	0	0	1	0	0		0	0	0	1	0	0
381	AD	Guayo	0	1	1	0	0	0	1	0	2	0	0	0			0	0	0	0	0	1	0		0	0	0	0	0	0	1	0	0	0		0	0	0	1	0	0
382	AD	Guayo	0	1	1	0	0	0	1	0	2	0	1	0			0	0	0	0	0	1	0		0	0	0	0	0	0	1	0	0	0		0	0	0	1	0	0
383	AD	Guayo	0	1	1	0	0	0	1	0	2	0	1	0			0	0	0	0	0	1	0		0	0	0	0	0	0	1	0	0	0		0	0	0	1	0	0
384	AD	Guayo	0	1	1	0	0	0	1	0	2	0	0	0			0	0	0	0	0	1	0		0	0	0	0	0	0	1	0	0	0		0	0	0	1	0	0
385	AD	Guayo	0	1	1	0	0	0	1	0	2	0	0	0			0	0	0	0	0	1	0		0	0	0	0	0	0	1	0	0	0		0	0	0	1	0	0
386	AD	Guayo	0	1	1	0	0	0	1	0	2	0	0	0			0	0	0	0	0	1	0		0	0	0	0	0	0	1	0	0	0		0	0	0	1	0	0
387	AD	Guayo	0	1	1	0	0	0	1	0	2	0	0	0			0	0	0	0	0	1	0		0	0	0	0	0	0	1	0	0	0		0	0	0	1	0	0
388	AD	Guayo	0	1	1	0	0	0	1	0	2	0	0	0			0	0	0	0	0	1	0		0	0	0	0	0	0	1	0	0	0		0	0	0	1	0	0
389	AD	Guayo	1	0	1	1	0	1	1	0	3	0	1	0			0	0	0	0	0	1	0		0	0	0	0	0	0	0	1	0	0		0	0	1	0	0	0
390	AD	Guayo	0	1	1	0	1	1	1	1	4	1	0	1			0	0	0	0	0	1	0		0	0	0	0	0	0	0	0	1	0		0	0	0	1	0	0
391	AD	Guayo	0	1	1	1	0	1	1	0	3	0	0	0			0	0	0	0	0	1	0		0	0	0	0	0	0	0	1	0	0		0	0	0	1	0	0
392	AD	Guayo	0	1	1	0	1	1	1	1	4	1	1	0			0	0	0	0	0	1	0		0	0	0	0	0	0	0	0	1	0		0	0	0	1	0	0
393	AD	Guayo	0	1	1	0	0	0	0	0	1	0	1	0			0	1	0	0	0	0	0		0	0	0	0	0	0	1	0	0	0		0	0	0	1	0	0
394	AD	Guayo	0	1	1	1	0	1	1	1	4	1	0	1			0	1	0	0	0	1	0		0	0	0	0	0	0	0	1	0	0		0	0	0	1	0	0
395	AD	Guayo	0	1	1	1	0	1	1	1	4	1	1	0			0	0	0	0	0	1	0		0	0	0	0	0	0	0	1	0	0		0	0	0	1	0	0
396	AD	Guayo	0	1	1	0	0	0	0	1	2	0	1	0			0	1	0	0	0	0	0		0	0	0	0	0	0	1	0	0	0		0	0	0	1	0	0
397	AD	Guayo	0	1	1	0	0	0	1	1	3	0	1	0			0	0	0	0	0	1	0		0	0	0	1	0	0	0	0	0	0		0	0	0	1	0	0
398	AD	Guayo	0	1	1	0	0	0	1	0	2	0	0	0			0	0	0	0	0	1	0		0	0	0	0	0	0	1	0	0	0		0	0	0	1	0	0
399	AD	Guayo	0	1	1	1	0	1	1	1	4	1	0	1			0	0	0	0	0	1	0		0	0	0	0	0	0	0	1	0	0		0	0	0	1	0	0
421	AD	Guayo	0	1	1	0	0	0	1	0	2	0	1	0			0	0	0	0	0	1	0		0	0	0	0	0	0	1	0	0	0		0	0	0	1	0	0
422	AD	Guayo	0	1	1	0	0	0	1	0	2	0	0	0			0	0	0	0	0	1	0		0	0	0	0	0	0	1	0	0	0		0	0	0	1	0	0
423	AD	Guayo	0	1	1	0	0	0	0	0	1	0	1	0			0	1	0	0	0	0	0		0	0	0	0	0	0	1	0	0	0		0	0	0	1	0	0
424	AD	Guayo	0	1	1	0	0	0	1	0	2	0	1	0			0	0	0	0	0	1	0		0	0	0	0	0	0	1	0	0	0		0	0	0	1	0	0
425	AD	Guayo	0	1	1	0	0	0	1	0	2	0	1	0			0	0	0	0	0	1	0		0	0	0	0	0	0	1	0	0	0		0	0	0	1	0	0
426	AD	Guayo	0	1	1	0	0	0	1	0	2	0	1	0			0	0	0	0	0	1	0		0	0	0	0	0	0	1	0	0	0		0	0	0	1	0	0
427	AD	Guayo	0	1	1	0	0	0	1	1	3	0	1	0			0	0	0	0	0	1	0		0	0	0	0	0	0	1	0	0	0		0	0	0	1	0	0
428	AD	Guayo	0	1	1	0	0	0	1	1	3	0	1	0			0	0	0	0	0	1	0		0	0	0	0	0	1	0	0	0	0		0	0	0	1	0	0
429	AD	Guayo	0	1	1	0	0	0	1	0	2	0	0	0			0	0	0	0	0	1	0		0	0	0	0	0	1	0	0	0	0		0	0	0	1	0	0
430	AD	Guayo	0	1	1	0	0	0	1	0	2	0	1	0			0	0	0	0	0	1	0		0	0	0	0	0	1	0	0	0	0		0	0	0	1	0	0
431	AD	Guayo	0	1	1	0	0	0	1	0	2	0	1	0			0	0	0	0	0	1	0		0	0	0	0	0	0	1	0	0	0		0	0	0	1	0	0
432	AD	Guayo	0	1	1	0	0	0	0	0	1	0	1	0			0	1	0	0	0	0	0		0	0	0	0	0	0	1	0	0	0		0	0	0	1	0	0
433	AD	Guayo	0	1	1	0	0	0	0	0	1	0	1	0			0	1	0	0	0	0	0		0	0	0	0	0	1	0	0	0	0		0	0	0	1	0	0
434	AD	Guayo	0	1	1	0	0	0	1	0	2	0	1	0			0	0	0	0	0	1	0		0	0	0	0	0	0	1	0	0	0		0	0	0	1	0	0
435	AD	Guayo	0	1	1	0	0	0	1	0	2	0	1	0			0	0	0	0	0	1	0		0	0	0	0	0	0	1	0	0	0		0	0	0	1	0	0
436	AD	Guayo	0	1	1	0	0	0	1	0	2	0	1	0			0	0	0	0	0	1	0		0	0	0	0	0	0	1	0	0	0		0	0	0	1	0	0
437	AD	Guayo	0	1	1	0	0	0	1	1	3	0	1	0			0	0	0	0	0	1	0		0	0	0	0	0	0	1	0	0	0		0	0	0	1	0	0
438	AD	Guayo	0	1	1	0	0	0	1	0	2	0	1	0			0	0	0	0	0	1	0		0	0	0	0	0	1	0	0	0	0		0	0	0	1	0	0
439	AD	Guayo	0	1	1	0	0	0	0	0	1	0	1	0			0	1	0	0	0	0	0		0	0	0	0	0	0	1	0	0	0		0	0	0	1	0	0
440	AD	Guayo	0	1	1	1	0	1	1	1	4	1	1	0			0	0	0	0	0	1	0		0	0	0	0	0	0	0	1	0	0		0	0	0	1	0	0
441	AD	Guayo	0	1	1	1	0	1	1	1	4	1	1	0			0	0	0	0	0	1	0		0	0	0	0	0	0	0	1	0	0		0	0	0	1	0	0
442	AD	Guayo	0	1	1	0	0	0	1	0	2	0	0	0			0	0	0	0	0	1	0		0	0	0	0	0	0	0	0	0	1		0	0	0	1	0	0
443	AD	Guayo	0	1	1	0	0	0	1	0	2	0	1	0			0	0	0	0	0	1	0		0	0	0	0	0	0	0	0	0	1		0	0	0	1	0	0
444	AD	Guayo	0	1	1	0	0	0	0	0	1	0	1	0			0	1	0	0	0	0	0		0	0	0	0	0	0	1	0	0	0		0	0	0	1	0	0
445	AD	Guayo	0	1	1	0	0	0	0	0	1	0	1	0			0	1	0	0	0	0	0		0	0	0	0	0	0	1	0	0	0		0	0	0	1	0	0
446	AD	Guayo	0	1	1	0	0	0	0	0	1	0	1	0			0	1	0	0	0	0	0		0	0	0	0	0	0	1	0	0	0		0	0	0	1	0	0
447	AD	Guayo	0	1	1	0	0	0	1	0	2	0	1	0			0	0	0	0	0	1	0		0	0	0	0	0	0	1	0	0	0		0	0	0	1	0	0
448	AD	Guayo	0	1	1	0	0	0	1	0	2	0	1	0			0	0	0	0	0	1	0		0	0	0	0	0	0	1	0	0	0		0	0	0	1	0	0
449	AD	Guayo	0	1	1	0	0	0	1	0	2	0	1	0			0	0	0	0	0	1	0		0	0	0	0	0	0	1	0	0	0		0	0	0	1	0	0
450	AD	Guayo	0	1	1	0	0	0	1	0	2	0	1	0			0	0	0	0	0	1	0		0	0	0	0	0	0	1	0	0	0		0	0	0	1	0	0
451	AD	Guayo	0	1	1	0	0	0	1	0	2	0	1	0			0	0	0	0	0	1	0		0	0	0	0	0	0	1	0	0	0		0	0	0	1	0	0
452	AD	Guayo	0	1	1	0	0	0	0	0	1	0	1	0			0	1	0	0	0	0	0		0	0	0	0	0	0	1	0	0	0		0	0	0	1	0	0
453	AD	Guayo	0	1	1	0	0	0	0	0	1	0	1	0			0	1	0	0	0	0	0		0	0	0	0	0	0	1	0	0	0		0	0	0	1	0	0
454	AD	Guayo	0	1	1	0	0	0	0	0	1	0	1	0			0	1	0	0	0	0	0		0	0	0	0	0	0	1	0	0	0		0	0	0	1	0	0
455	AD	Guayo	0	1	1	0	0	0	0	0	1	0	1	0			0	1	0	0	0	0	0		0	0	0	0	0	0	1	0	0	0		0	0	0	1	0	0
456	AD	Guayo	0	1	1	0	0	0	0	0	1	0	0	0			0	1	0	0	0	0	0		0	0	0	0	0	0	1	0	0	0		0	0	0	1	0	0
457	AD	Guayo	0	1	1	0	0	0	0	0	1	0	1	0			0	1	0	0	0	0	0		0	0	0	0	0	0	1	0	0	0		0	0	0	1	0	0
458	AD	Guayo	0	1	1	0	0	0	0	0	1	0	1	0			0	1	0	0	0	0	0		0	0	0	0	0	1	0	0	0	0		0	0	0	1	0	0
459	AD	Guayo	0	1	1	0	0	0	0	0	1	0	1	0			0	1	0	0	0	0	0		0	0	0	0	0	0	1	0	0	0		0	0	0	1	0	0
460	AD	Guayo	0	1	1	0	0	0	0	0	1	0	1	0			0	1	0	0	0	0	0		0	0	0	0	0	0	1	0	0	0		0	0	0	1	0	0
461	AD	Guayo	0	1	1	0	0	0	0	0	1	0	1	0			0	1	0	0	0	0	0		0	0	0	0	0	0	1	0	0	0		0	0	0	1	0	0
462	AD	Guayo	0	1	1	0	0	0	0	0	1	0	1	0			0	1	0	0	0	0	0		0	0	0	0	0	0	1	0	0	0		0	0	0	1	0	0
463	AD	Guayo	0	1	1	0	0	0	0	0	1	0	1	0			0	1	0	0	0	0	0		0	0	0	0	0	0	1	0	0	0		0	0	0	1	0	0
464	AD	Guayo	0	1	1	0	0	0	0	0	1	0	1	0			0	1	0	0	0	0	0		0	0	0	0	0	0	1	0	0	0		0	0	0	1	0	0
465	AD	Guayo	0	1	1	0	0	0	0	0	1	0	1	0			0	1	0	0	0	0	0		0	0	0	0	0	0	1	0	0	0		0	0	0	1	0	0
466	AD	Guayo	0	1	1	0	0	0	0	0	1	0	1	0			0	1	0	0	0	0	0		0	0	0	0	0	0	1	0	0	0		0	0	0	1	0	0
467	AD	Guayo	0	1	1	0	0	0	0	0	1	0	1	0			0	1	0	0	0	0	0		0	0	0	0	0	0	1	0	0	0		0	0	0	1	0	0
468	AD	Guayo	0	1	1	0	0	0	0	0	1	0	1	0			0	1	0	0	0	0	0		0	0	0	0	0	0	1	0	0	0		0	0	0	1	0	0
469	AD	Guayo	0	1	1	0	0	0	0	0	1	0	1	0			0	1	0	0	0	0	0		0	0	0	0	0	0	1	0	0	0		0	0	0	1	0	0
470	AD	Guayo	0	1	1	0	0	0	0	0	1	0	1	0			0	1	0	0	0	0	0		0	0	0	0	0	0	1	0	0	0		0	0	0	1	0	0
471	AD	Guayo	0	1	1	0	0	0	0	0	1	0	1	0			0	1	0	0	0	0	0		0	0	0	0	0	0	1	0	0	0		0	0	0	1	0	0
472	AD	Guayo	0	1	1	0	0	0	0	1	2	0	1	0			0	1	0	0	0	0	0		0	0	0	0	0	0	1	0	0	0		0	0	0	1	0	0
473	AD	Guayo	0	1	1	1	0	1	1	0	3	0	1	0			0	0	0	0	0	1	0		0	0	0	0	0	0	0	1	0	0		0	0	0	1	0	0
474	AD	Guayo	0	1	1	0	0	0	0	0	1	0	1	0			0	1	0	0	0	0	0		0	0	0	0	0	0	1	0	0	0		0	0	0	1	0	0
475	AD	Guayo	0	1	1	0	0	0	0	0	1	0	1	0			0	1	0	0	0	0	0		0	0	0	0	0	0	0	0	0	1		0	0	0	1	0	0
476	AD	Guayo	1	0	1	1	0	1	0	0	2	0	0	0			0	1	0	0	0	0	0		0	0	0	0	0	0	0	1	0	0		0	0	1	0	0	0
477	AD	Guayo	0	1	1	1	0	1	1	0	3	0	1	0			0	0	0	0	0	1	0		0	0	0	0	0	0	0	1	0	0		0	0	0	1	0	0
478	AD	Guayo	0	1	1	0	0	0	0	0	1	0	1	0			0	1	0	0	0	0	0		0	0	0	0	0	0	1	0	0	0		0	0	0	1	0	0
479	AD	Guayo	0	1	1	0	0	0	0	0	1	0	1	0			0	1	0	0	0	0	0		0	0	0	0	0	0	1	0	0	0		0	0	0	1	0	0
480	AD	Guayo	0	1	1	0	0	0	0	0	1	0	0	0			0	1	0	0	0	0	0		0	0	0	0	0	0	1	0	0	0		0	0	0	1	0	0
481	AD	Guayo	0	1	1	0	1	1	1	0	3	0	0	0			0	0	0	0	0	1	0		0	0	0	0	0	0	0	0	1	0		0	0	0	1	0	0
482	AD	Guayo	0	1	1	0	0	0	0	0	1	0	1	0			0	1	0	0	0	0	0		0	0	0	0	0	1	0	0	0	0		0	0	0	1	0	0
483	AD	Guayo	0	1	1	0	0	0	1	0	2	0	1	0			0	0	0	0	0	1	0		0	0	0	1	0	0	0	0	0	0		0	0	0	1	0	0
484	AD	Guayo	0	1	1	1	0	1	0	0	2	0	1	0			0	1	0	0	0	0	0		0	0	0	0	0	0	0	1	0	0		0	0	0	1	0	0
485	AD	Guayo	0	1	1	1	0	1	1	0	3	0	1	0			0	0	0	0	0	1	0		0	0	0	0	0	0	0	1	0	0		0	0	0	1	0	0
486	AD	Guayo	0	1	1	0	0	0	1	0	2	0	0	0			0	0	0	0	0	1	0		0	0	0	0	0	0	0	0	0	1		0	0	0	1	0	0
487	AD	Guayo	0	1	1	0	0	0	1	0	2	0	1	0			0	0	0	0	0	1	0		0	0	0	0	0	0	1	0	0	0		0	0	0	1	0	0
488	AD	Guayo	0	1	1	0	1	1	0	0	2	0	1	0			0	1	0	0	0	0	0		0	0	0	0	0	0	0	0	1	0		0	0	0	1	0	0
489	AD	Guayo	0	1	1	0	0	0	0	0	1	0	1	0			0	1	0	0	0	0	0		0	0	0	0	0	0	1	0	0	0		0	0	0	1	0	0
490	AD	Guayo	0	1	1	0	0	0	1	0	2	0	0	0			0	0	0	0	0	1	0		0	0	0	0	0	0	1	0	0	0		0	0	0	1	0	0
491	AD	Guayo	0	1	1	0	0	0	0	0	1	0	1	0			0	1	0	0	0	0	0		0	0	0	0	0	0	1	0	0	0		0	0	0	1	0	0
492	AD	Guayo	0	1	1	0	1	1	1	1	4	1	0	1			0	0	0	0	0	1	0		0	0	0	0	0	0	0	0	1	0		0	0	0	1	0	0
493	AD	Guayo	0	1	1	0	0	0	0	1	2	0	0	0			0	1	0	0	0	0	0		0	0	0	0	0	0	1	0	0	0		0	0	0	1	0	0
494	AD	Guayo	1	0	1	0	0	0	0	1	2	0	1	0			0	1	0	0	0	0	0		0	0	0	0	0	0	1	0	0	0		0	0	1	0	0	0
495	AD	Guayo	0	1	1	0	0	0	0	0	1	0	1	0			0	1	0	0	0	0	0		0	0	0	0	0	0	1	0	0	0		0	0	0	1	0	0
496	AD	Guayo	0	1	1	0	0	0	1	0	2	0	1	0			0	0	0	0	0	1	0		0	0	0	0	0	0	1	0	0	0		0	0	0	1	0	0
497	AD	Guayo	0	1	1	0	0	0	0	0	1	0	1	0			0	1	0	0	0	0	0		0	0	0	0	0	0	1	0	0	0		0	0	0	1	0	0
498	AD	Guayo	0	1	1	0	0	0	0	0	1	0	0	0			0	1	0	0	0	0	0		0	0	0	0	0	0	1	0	0	0		0	0	0	1	0	0
499	AD	Guayo	0	1	1	0	0	0	1	0	2	0	1	0			0	0	0	0	0	1	0		0	0	0	0	0	0	1	0	0	0		0	0	0	1	0	0
3	AD	Curiapo	0	1	1	1	0	1	1	0	3	0	0	0			0	0	0	0	0	1	0		0	0	0	0	0	0	0	1	0	0		0	0	0	1	0	0
5	AD	Curiapo	1	0	1	1	0	1	1	1	4	1	0	1			0	0	0	0	0	1	0		0	0	0	0	0	0	0	1	0	0		0	0	1	0	0	0
10	AD	Curiapo	1	0	1	0	0	0	1	1	3	0	0	0			0	0	0	0	0	1	0		0	0	0	0	0	0	0	0	0	1		0	0	1	0	0	0
26	AD	Curiapo	1	0	1	1	0	1	1	0	3	0	0	0			0	0	0	0	0	1	0		0	0	0	0	0	0	0	1	0	0		0	0	1	0	0	0
27	AD	Curiapo	1	0	1	1	0	1	1	0	3	0	0	0			0	0	0	0	0	1	0		0	0	0	0	0	0	0	1	0	0		0	0	1	0	0	0
28	AD	Curiapo	1	0	1	1	0	1	1	0	3	0	0	0			0	0	0	0	0	1	0		0	0	0	0	0	0	0	1	0	0		0	0	1	0	0	0
32	AD	Curiapo	0	1	1	1	0	1	1	1	4	1	0	1			0	0	0	0	0	1	0		0	0	0	0	0	0	0	1	0	0		0	0	0	1	0	0
33	AD	Curiapo	0	1	1	0	0	0	1	1	3	0	0	0			0	0	0	0	0	1	0		0	0	0	0	0	0	1	0	0	0		0	0	0	1	0	0
34	AD	Curiapo	1	0	1	0	1	1	1	1	4	1	1	0			0	0	0	0	0	1	0		0	0	0	0	0	0	0	0	1	0		0	0	1	0	0	0
38	AD	Curiapo	0	1	1	0	1	1	1	1	4	1	0	1			0	0	0	0	0	1	0		0	0	0	0	0	0	0	0	1	0		0	0	0	1	0	0
39	AD	Curiapo	1	0	1	0	1	1	1	1	4	1	0	1			0	0	0	0	0	1	0		0	0	0	0	0	0	0	0	1	0		0	0	1	0	0	0
40	AD	Curiapo	0	1	1	0	0	0	0	1	2	0	0	0			0	1	0	0	0	0	0		0	0	0	0	0	0	0	0	0	1		0	0	0	1	0	0
53	AD	Curiapo	1	0	1	0	1	1	1	1	4	1	0	1			0	0	0	0	0	1	0		0	0	0	0	0	0	0	0	1	0		0	0	1	0	0	0
54	AD	Curiapo	0	1	1	0	0	0	1	1	3	0	0	0			0	0	0	0	0	1	0		0	0	0	0	0	0	0	0	0	1		0	0	0	1	0	0
55	AD	Curiapo	0	1	1	0	0	0	1	0	2	0	0	0			0	0	0	0	0	1	0		0	0	0	0	0	0	0	0	0	1		0	0	0	1	0	0
63	AD	Curiapo	0	1	1	0	0	0	0	1	2	0	0	0			0	1	0	0	0	0	0		0	0	0	0	0	0	0	0	0	1		0	0	0	1	0	0
64	AD	Curiapo	0	1	1	0	1	1	1	1	4	1	0	1			0	0	0	0	0	1	0		0	0	0	0	0	0	0	0	1	0		0	0	0	1	0	0
65	AD	Curiapo	0	1	1	0	0	0	0	0	1	0	0	0			0	1	0	0	0	0	0		0	0	0	0	0	0	0	0	0	1		0	0	0	1	0	0
66	AD	Curiapo	0	1	1	0	1	1	1	1	4	1	0	1			0	0	0	0	0	1	0		0	0	0	0	0	0	0	0	1	0		0	0	0	1	0	0
99	AD	Curiapo	0	1	1	1	0	1	1	0	3	0	0	0			0	0	0	0	0	1	0		0	0	0	0	0	0	0	1	0	0		0	0	0	1	0	0
100	AD	Curiapo	0	1	1	1	0	1	1	0	3	0	0	0			0	0	0	0	0	1	0		0	0	0	0	0	0	0	1	0	0		0	0	0	1	0	0
101	AD	Curiapo	0	1	1	0	0	0	1	0	2	0	0	0			0	0	0	0	0	1	0		0	0	0	0	0	0	1	0	0	0		0	0	0	1	0	0
102	AD	Curiapo	0	1	1	0	0	0	1	0	2	0	0	0			0	0	0	0	0	1	0		0	0	0	1	0	0	1	0	0	0		0	0	0	1	0	0
103	AD	Curiapo	0	1	1	0	0	0	1	0	2	0	0	0			0	0	0	0	0	1	0		0	0	0	0	0	0	1	0	0	0		0	0	0	1	0	0
134	AD	Curiapo	0	1	1	0	1	1	0	0	2	0	0	0			0	1	0	0	0	0	0		0	0	0	0	0	0	0	0	1	0		0	0	0	1	0	0
135	AD	Curiapo	0	1	1	0	0	0	0	1	2	0	1	0			0	1	0	0	0	0	0		0	0	0	0	0	0	0	0	0	1		0	0	0	1	0	0
136	AD	Curiapo	0	1	1	0	0	0	0	1	2	0	0	0			0	1	0	0	0	0	0		0	0	0	0	0	0	0	0	0	1		0	0	0	1	0	0
137	AD	Curiapo	0	1	1	0	0	0	0	1	2	0	0	0			0	0	0	1	1	0	0		0	0	0	0	0	0	0	0	0	1		0	0	0	1	0	0
138	AD	Curiapo	0	1	1	0	0	0	0	0	1	0	0	0			0	1	0	0	0	0	0		0	0	0	0	0	0	1	0	0	0		0	0	0	1	0	0
172	AD	Curiapo	0	1	1	0	0	0	1	1	3	0	0	0			0	0	0	0	0	1	0		0	0	0	0	0	0	1	0	0	0		0	0	0	1	0	0
173	AD	Curiapo	1	0	1	0	1	1	1	1	4	1	1	0			0	0	0	0	0	1	0		0	0	0	0	0	0	0	0	1	0		0	0	1	0	0	0
174	AD	Curiapo	1	0	1	0	1	1	1	1	4	1	1	0			0	0	0	0	0	1	0		0	0	0	0	0	0	0	0	1	0		0	0	1	0	0	0
175	AD	Curiapo	0	1	1	0	0	0	0	0	1	0	0	0			0	1	0	0	0	0	0		0	0	0	0	0	0	1	0	0	0		0	0	0	1	0	0
176	AD	Curiapo	1	0	1	0	1	1	1	1	4	1	1	0			0	0	0	0	0	1	0		0	0	0	0	0	0	0	0	1	0		0	0	1	0	0	0
177	AD	Curiapo	0	1	1	0	0	0	0	1	2	0	0	0			0	1	0	0	0	0	0		0	0	0	0	0	1	0	0	0	0		0	0	0	1	0	0
218	AD	Curiapo	0	1	1	0	0	0	1	1	3	0	0	0			0	0	0	0	0	1	0		0	0	0	0	0	0	1	0	0	0		0	0	0	1	0	0
219	AD	Curiapo	0	1	1	0	0	0	1	1	3	0	1	0			0	0	0	0	0	1	0		0	0	0	0	0	0	0	0	0	1		0	0	0	1	0	0
220	AD	Curiapo	0	1	1	0	0	0	0	0	1	0	0	0			0	1	0	0	0	0	0		0	0	0	0	0	0	1	0	0	0		0	0	0	1	0	0
221	AD	Curiapo	1	0	1	0	1	1	1	1	4	1	0	1			0	0	0	0	0	1	0		0	0	0	0	0	0	0	0	1	0		0	0	1	0	0	0
222	AD	Curiapo	0	1	1	0	0	0	0	0	1	0	0	0			0	1	0	0	0	0	0		0	0	0	0	0	0	1	0	0	0		0	0	0	1	0	0
223	AD	Curiapo	1	0	1	0	1	1	1	1	4	1	0	1			0	0	0	0	0	1	0		0	0	0	0	0	0	0	0	1	0		0	0	1	0	0	0
224	AD	Curiapo	0	1	1	0	0	0	0	0	1	0	0	0			0	1	0	0	0	0	0		0	0	0	0	0	0	0	0	0	1		0	0	0	1	0	0
225	AD	Curiapo	0	1	1	0	1	1	0	0	2	0	1	0			0	1	0	0	0	0	0		0	0	0	0	0	0	0	0	1	0		0	0	0	1	0	0
293	AD	Curiapo	0	1	1	0	1	1	1	0	3	0	1	0			0	0	0	0	0	1	0		0	0	0	0	0	0	0	0	1	0		0	0	0	1	0	0
294	AD	Curiapo	1	0	1	1	0	1	1	0	3	0	0	0			0	0	0	0	0	1	0		0	0	0	0	0	0	0	1	0	0		0	0	1	0	0	0
295	AD	Curiapo	1	0	1	1	0	1	1	0	3	0	0	0			0	0	0	0	0	1	0		0	0	0	0	0	0	0	1	0	0		0	0	1	0	0	0
296	AD	Curiapo	0	1	1	1	0	1	1	0	3	0	0	0			0	0	0	0	0	1	0		0	0	0	0	0	0	0	1	0	0		0	0	0	1	0	0
297	AD	Curiapo	1	0	1	1	0	1	1	1	4	1	0	1			0	0	0	0	0	1	0		0	0	0	0	0	0	0	1	0	0		0	0	1	0	0	0
298	AD	Curiapo	0	1	1	0	0	0	1	0	2	0	1	0			0	0	0	0	0	1	0		0	0	0	0	0	0	1	0	0	0		0	0	0	1	0	0
299	AD	Curiapo	0	1	1	0	0	0	1	0	2	0	0	0			0	0	0	0	0	1	0		0	0	0	0	0	0	1	0	0	0		0	0	0	1	0	0
300	AD	Curiapo	0	1	1	1	0	1	1	1	4	1	0	1			0	0	0	0	0	1	0		0	0	0	0	0	0	0	1	0	0		0	0	0	1	0	0
301	AD	Curiapo	0	1	1	0	0	0	0	1	2	0	1	0			0	1	0	0	0	0	0		0	0	0	0	0	0	1	0	0	0		0	0	0	1	0	0
302	AD	Curiapo	1	0	1	0	1	1	1	0	3	0	0	0			0	0	0	0	0	1	0		0	0	0	0	0	0	0	0	1	0		0	0	1	0	0	0
303	AD	Curiapo	0	1	1	0	0	0	1	0	2	0	1	0			0	0	0	0	0	1	0		0	0	0	0	0	0	1	0	0	0		0	0	0	1	0	0
362	AD	Curiapo	0	1	1	0	0	0	0	0	1	0	1	0			0	1	0	0	0	0	0		0	0	0	0	0	0	1	0	0	0		0	0	0	1	0	0
363	AD	Curiapo	0	1	1	0	0	0	0	0	1	0	1	0			0	1	0	0	0	0	0		0	0	0	0	0	0	1	0	0	0		0	0	0	1	0	0
364	AD	Curiapo	0	1	1	0	0	0	0	0	1	0	1	0			0	1	0	0	0	0	0		0	0	0	0	0	0	1	0	0	0		0	0	0	1	0	0
365	AD	Curiapo	0	1	1	0	0	0	0	0	1	0	1	0			0	1	0	0	0	0	0		0	0	0	0	0	0	1	0	0	0		0	0	0	1	0	0
366	AD	Curiapo	0	1	1	0	0	0	0	0	1	0	1	0			0	1	0	0	0	0	0		0	0	0	0	0	1	0	0	0	0		0	0	0	1	0	0
367	AD	Curiapo	0	1	1	0	0	0	1	1	3	0	0	0			0	0	0	0	0	1	0		0	0	0	1	0	0	0	0	0	0		0	0	0	1	0	0
368	AD	Curiapo	0	1	1	0	0	0	0	0	1	0	1	0			0	1	0	0	0	0	0		0	0	0	0	0	0	1	0	0	0		0	0	0	1	0	0
369	AD	Curiapo	0	1	1	0	0	0	0	1	2	0	1	0			0	1	0	0	0	0	0		0	0	0	0	0	1	0	0	0	0		0	0	0	1	0	0
370	AD	Curiapo	0	1	1	0	0	0	0	0	1	0	1	0			0	1	0	0	0	0	0		0	0	0	0	0	0	1	0	0	0		0	0	0	1	0	0
371	AD	Curiapo	0	1	1	0	0	0	0	0	1	0	1	0			0	1	0	0	0	0	0		0	0	0	0	0	0	1	0	0	0		0	0	0	1	0	0
372	AD	Curiapo	0	1	1	0	0	0	0	0	1	0	1	0			0	1	0	0	0	0	0		0	0	0	0	0	0	1	0	0	0		0	0	0	1	0	0
373	AD	Curiapo	0	1	1	0	0	0	0	0	1	0	1	0			0	1	0	0	0	0	0		0	0	0	0	0	0	1	0	0	0		0	0	0	1	0	0
374	AD	Curiapo	0	1	1	0	0	0	0	0	1	0	1	0			0	1	0	0	0	0	0		0	0	0	0	0	0	1	0	0	0		0	0	0	1	0	0
375	AD	Curiapo	0	1	1	0	0	0	0	0	1	0	1	0			0	1	0	0	0	0	0		0	0	0	0	0	0	1	0	0	0		0	0	0	1	0	0
376	AD	Curiapo	0	1	1	0	0	0	0	0	1	0	1	0			0	1	0	0	0	0	0		0	0	0	0	0	0	0	0	0	1		0	0	0	1	0	0
377	AD	Curiapo	0	1	1	0	0	0	1	1	3	0	1	0			0	0	0	0	0	1	0		0	0	0	1	0	0	0	0	0	0		0	0	0	1	0	0
378	AD	Curiapo	1	0	1	0	0	0	1	1	3	0	0	0			0	0	0	0	0	1	0		0	0	0	0	0	0	1	0	0	0		0	0	1	0	0	0
379	AD	Curiapo	0	1	1	0	1	1	1	1	4	1	0	1			0	0	0	0	0	1	0		0	0	0	0	0	0	0	0	1	0		0	0	0	1	0	0
400	AD	Curiapo	1	0	1	0	0	0	1	1	3	0	0	0			0	0	0	0	0	1	0		0	0	0	0	0	0	0	0	0	1		0	0	1	0	0	0
401	AD	Curiapo	0	1	1	0	0	0	1	0	2	0	0	0			0	0	0	0	0	1	0		0	0	0	0	0	0	0	0	0	1		0	0	0	1	0	0
402	AD	Curiapo	0	1	1	1	0	1	1	1	4	1	0	1			0	0	0	0	0	1	0		0	0	0	0	0	0	0	1	0	0		0	0	0	1	0	0
403	AD	Curiapo	0	1	1	0	0	0	1	1	3	0	0	0			0	0	0	0	0	1	0		0	0	0	0	0	0	0	0	0	1		0	0	0	1	0	0
404	AD	Curiapo	0	1	1	0	0	0	1	1	3	0	0	0			0	0	0	0	0	1	0		0	0	0	0	0	0	0	0	0	1		0	0	0	1	0	0
405	AD	Curiapo	0	1	1	1	0	1	1	0	3	0	0	0			0	0	0	0	0	1	0		0	0	0	0	0	0	0	1	0	0		0	0	0	1	0	0
406	AD	Curiapo	0	1	1	0	1	1	1	0	3	0	1	0			0	0	0	0	0	1	0		0	0	0	0	0	0	0	0	1	0		0	0	0	1	0	0
407	AD	Curiapo	0	1	1	1	0	1	1	1	4	1	0	1			0	0	0	0	0	1	0		0	0	0	0	0	0	0	1	0	0		0	0	0	1	0	0
408	AD	Curiapo	0	1	1	1	0	1	1	1	4	1	0	1			0	0	0	0	0	1	0		0	0	0	0	0	0	0	1	0	0		0	0	0	1	0	0
409	AD	Curiapo	0	1	1	0	1	1	1	0	3	0	0	0			0	0	0	0	0	1	0		0	0	0	0	0	0	0	0	1	0		0	0	0	1	0	0
410	AD	Curiapo	0	1	1	0	0	0	1	1	3	0	0	0			0	0	0	0	0	1	0		0	0	0	1	0	0	0	0	0	0		0	0	0	1	0	0
411	AD	Curiapo	0	1	1	0	0	0	1	0	2	0	0	0			0	0	0	0	0	1	0		0	0	0	1	0	0	0	0	0	0		0	0	0	1	0	0
412	AD	Curiapo	0	1	1	0	1	1	1	0	3	0	0	0			0	0	0	0	0	1	0		0	0	0	0	0	0	0	0	1	0		0	0	0	1	0	0
413	AD	Curiapo	0	1	1	0	0	0	1	1	3	0	0	0			0	0	0	0	0	1	0		0	0	0	0	0	0	1	0	0	0		0	0	0	1	0	0
414	AD	Curiapo	0	1	1	1	0	1	1	1	4	1	0	1			0	0	0	0	0	1	0		0	0	0	0	0	0	0	1	0	0		0	0	0	1	0	0
415	AD	Curiapo	1	0	1	0	0	0	1	1	3	0	0	0			0	0	0	0	0	1	0		0	0	0	1	0	0	0	0	0	0		0	0	1	0	0	0
416	AD	Curiapo	0	1	1	1	0	1	1	0	3	0	0	0			0	0	0	0	0	1	0		0	0	0	0	0	0	0	1	0	0		0	0	0	1	0	0
417	AD	Curiapo	0	1	1	1	0	1	1	0	3	0	0	0			0	0	0	0	0	1	0		0	0	0	0	0	0	0	1	0	0		0	0	0	1	0	0
418	AD	Curiapo	0	1	1	0	0	0	1	1	3	0	0	0			0	0	0	0	0	1	0		0	0	0	0	0	0	1	0	0	0		0	0	0	1	0	0
419	AD	Curiapo	0	1	1	0	0	0	1	1	3	0	0	0			0	0	0	0	0	1	0		0	0	0	0	0	0	0	0	0	1		0	0	0	1	0	0
420	AD	Curiapo	1	0	1	0	0	0	1	0	2	0	0	0			0	0	0	0	0	1	0		0	0	0	1	0	0	0	0	0	0		0	0	1	0	0	0
4	AD	Nabasanuka	0	1	1	0	0	0	0	0	1	0	1	0			0	1	0	0	0	0	0		0	0	0	0	0	0	1	0	0	0		0	0	0	1	0	0
11	AD	Nabasanuka	0	1	1	0	0	0	1	0	2	0	1	0			0	0	0	0	0	1	0		0	0	0	0	0	0	1	0	0	0		0	0	0	1	0	0
12	AD	Nabasanuka	1	0	1	0	1	1	1	1	4	1	0	1			0	0	0	0	0	1	0		0	0	0	0	0	0	0	0	1	0		0	0	1	0	0	0
59	AD	Nabasanuka	0	1	1	0	0	0	0	0	1	0	1	0			0	1	0	0	0	0	0		0	0	0	0	0	0	1	0	0	0		0	0	0	1	0	0
60	AD	Nabasanuka	0	1	1	0	0	0	0	0	1	0	1	0			0	1	0	0	0	0	0		0	0	0	0	0	0	1	0	0	0		0	0	0	1	0	0
61	AD	Nabasanuka	0	1	1	0	0	0	0	0	1	0	1	0			0	1	0	0	0	0	0		0	0	0	0	0	0	1	0	0	0		0	0	0	1	0	0
62	AD	Nabasanuka	1	0	1	0	1	1	1	0	3	0	1	0			0	0	0	0	0	1	0		0	0	0	0	0	0	0	0	1	0		0	0	1	0	0	0
67	AD	Nabasanuka	0	1	1	0	0	0	0	0	1	0	0	0			0	1	0	0	0	0	0		0	0	0	0	0	0	1	0	0	0		0	0	0	1	0	0
68	AD	Nabasanuka	0	1	1	0	0	0	0	1	2	0	1	0			0	1	0	0	0	0	0		0	0	0	0	0	0	1	0	0	0		0	0	0	1	0	0
69	AD	Nabasanuka	0	1	1	0	0	0	0	0	1	0	1	0			0	1	0	0	0	0	0		0	0	0	0	0	0	1	0	0	0		0	0	0	1	0	0
70	AD	Nabasanuka	0	1	1	0	0	0	1	1	3	0	1	0			0	0	0	0	0	1	0		0	0	0	0	0	0	1	0	0	0		0	0	0	1	0	0
149	AD	Nabasanuka	0	1	1	0	0	0	0	1	2	0	1	0			0	1	0	0	0	0	0		0	0	0	0	0	0	1	0	0	0		0	0	0	1	0	0
150	AD	Nabasanuka	0	1	1	0	1	1	0	0	2	0	0	0			0	1	0	0	0	0	0		0	0	0	0	0	0	0	0	1	0		0	0	0	1	0	0
151	AD	Nabasanuka	0	1	1	0	1	1	0	1	3	0	0	0			0	1	0	0	0	0	0		0	0	0	0	0	0	0	0	1	0		0	0	0	1	0	0
152	AD	Nabasanuka	0	1	1	0	1	1	0	1	3	0	0	0			0	1	0	0	0	0	0		0	0	0	0	0	0	0	0	1	0		0	0	0	1	0	0
153	AD	Nabasanuka	0	1	1	0	1	1	0	1	3	0	0	0			0	1	0	0	0	0	0		0	0	0	0	0	0	0	0	1	0		0	0	0	1	0	0
197	AD	Nabasanuka	0	1	1	0	0	0	0	0	1	0	1	0			0	1	0	0	0	0	0		0	0	0	0	0	0	1	0	0	0		0	0	0	1	0	0
198	AD	Nabasanuka	0	1	1	0	0	0	0	0	1	0	1	0			0	1	0	0	0	0	0		0	0	0	0	0	0	0	0	0	1		0	0	0	1	0	0
199	AD	Nabasanuka	0	1	1	0	0	0	0	0	1	0	1	0			0	1	0	0	0	0	0		0	0	0	0	0	0	1	0	0	0		0	0	0	1	0	0
200	AD	Nabasanuka	0	1	1	0	0	0	1	0	2	0	0	0			0	0	0	0	0	1	0		0	0	0	0	0	0	1	0	0	0		0	0	0	1	0	0
201	AD	Nabasanuka	0	1	1	0	0	0	0	0	1	0	1	0			0	1	0	0	0	0	0		0	0	0	0	0	0	0	0	0	1		0	0	0	1	0	0
202	AD	Nabasanuka	0	1	1	0	0	0	0	1	2	0	0	0			0	1	0	0	0	0	0		0	0	0	0	0	0	1	0	0	0		0	0	0	1	0	0
203	AD	Nabasanuka	0	1	1	0	0	0	0	1	2	0	0	0			0	1	0	0	0	0	0		0	0	0	0	0	0	1	0	0	0		0	0	0	1	0	0
243	AD	Nabasanuka	0	1	1	0	0	0	1	1	3	0	1	0			0	0	0	0	0	1	0		0	0	0	0	0	1	0	0	0	0		0	0	0	1	0	0
244	AD	Nabasanuka	0	1	1	0	0	0	1	1	3	0	1	0			0	0	0	0	0	1	0		0	0	0	0	0	1	0	0	0	0		0	0	0	1	0	0
245	AD	Nabasanuka	0	1	1	0	0	0	1	0	2	0	1	0			0	0	0	0	0	1	0		0	0	0	0	0	0	1	0	0	0		0	0	0	1	0	0
246	AD	Nabasanuka	0	1	1	0	0	0	1	0	2	0	1	0			0	0	0	0	0	1	0		0	0	0	0	0	0	1	0	0	0		0	0	0	1	0	0
247	AD	Nabasanuka	0	1	1	0	0	0	1	1	3	0	0	0			0	0	0	0	0	1	0		0	0	0	0	0	1	0	0	0	0		0	0	0	1	0	0
248	AD	Nabasanuka	0	1	1	0	1	1	1	1	4	1	1	0			0	0	0	0	0	1	0		0	0	0	0	0	0	0	0	1	0		0	0	0	1	0	0
249	AD	Nabasanuka	0	1	1	0	0	0	1	0	2	0	1	0			0	0	0	0	0	1	0		0	0	0	0	0	1	0	0	0	0		0	0	0	1	0	0
250	AD	Nabasanuka	1	0	1	0	0	0	1	0	2	0	1	0			0	0	0	0	0	1	0		0	0	0	0	0	1	0	0	0	0		0	0	1	0	0	0
251	AD	Nabasanuka	1	0	1	0	0	0	1	0	2	0	1	0			0	0	0	0	0	1	0		0	0	0	0	0	1	0	0	0	0		0	0	1	0	0	0
272	AD	Nabasanuka	0	1	1	1	0	1	1	1	4	1	0	1			0	0	0	0	0	1	0		0	0	0	0	0	0	0	1	0	0		0	0	0	1	0	0
273	AD	Nabasanuka	0	1	1	1	0	1	1	1	4	1	0	1			0	0	0	0	0	1	0		0	0	0	0	0	0	0	1	0	0		0	0	0	1	0	0
274	AD	Nabasanuka	0	1	1	0	0	0	1	1	3	0	0	0			0	0	0	0	0	1	0		0	0	0	0	0	0	0	0	0	1		0	0	0	1	0	0
275	AD	Nabasanuka	0	1	1	0	0	0	1	1	3	0	1	0			0	0	0	0	0	1	0		0	0	0	0	0	0	1	0	0	0		0	0	0	1	0	0
276	AD	Nabasanuka	0	1	1	1	0	1	1	1	4	1	0	1			0	0	0	0	0	1	0		0	0	0	0	0	0	0	1	0	0		0	0	0	1	0	0
277	AD	Nabasanuka	0	1	1	0	0	0	0	1	2	0	1	0			0	1	0	0	0	0	0		0	0	0	0	0	0	1	0	0	0		0	0	0	1	0	0
278	AD	Nabasanuka	0	1	1	1	0	1	1	1	4	1	0	1			0	0	0	0	0	1	0		0	0	0	0	0	0	0	1	0	0		0	0	0	1	0	0
279	AD	Nabasanuka	0	1	1	0	0	0	0	1	2	0	1	0			0	1	0	0	0	0	0		0	0	0	0	0	0	1	0	0	0		0	0	0	1	0	0
280	AD	Nabasanuka	0	1	1	0	0	0	0	1	2	0	0	0			0	1	0	0	0	0	0		0	0	0	0	0	0	1	0	0	0		0	0	0	1	0	0
281	AD	Nabasanuka	0	1	1	0	0	0	1	0	2	0	0	0			0	0	0	0	0	1	0		0	0	0	0	0	0	1	0	0	0		0	0	0	1	0	0
331	AD	Nabasanuka	0	1	1	0	0	0	0	1	2	0	1	0			0	1	0	0	0	0	0		0	0	0	0	0	0	1	0	0	0		0	0	0	1	0	0
332	AD	Nabasanuka	0	1	1	0	0	0	0	0	1	0	1	0			0	1	0	0	0	0	0		0	0	0	0	0	0	1	0	0	0		0	0	0	1	0	0
333	AD	Nabasanuka	0	1	1	0	0	0	0	0	1	0	1	0			0	1	0	0	0	0	0		0	0	0	0	0	0	1	0	0	0		0	0	0	1	0	0
334	AD	Nabasanuka	0	1	1	0	0	0	0	0	1	0	1	0			0	1	0	0	0	0	0		0	0	0	0	0	0	1	0	0	0		0	0	0	1	0	0
335	AD	Nabasanuka	0	1	1	0	0	0	0	0	1	0	1	0			0	1	0	0	0	0	0		0	0	0	0	0	0	1	0	0	0		0	0	0	1	0	0
336	AD	Nabasanuka	0	1	1	0	0	0	0	1	2	0	1	0			0	1	0	0	0	0	0		0	0	0	0	0	0	1	0	0	0		0	0	0	1	0	0
337	AD	Nabasanuka	0	1	1	0	0	0	0	0	1	0	1	0			0	1	0	0	0	0	0		0	0	0	0	0	0	1	0	0	0		0	0	0	1	0	0
338	AD	Nabasanuka	0	1	1	0	0	0	0	0	1	0	1	0			0	1	0	0	0	0	0		0	0	0	0	0	0	1	0	0	0		0	0	0	1	0	0
339	AD	Nabasanuka	0	1	1	0	0	0	0	0	1	0	1	0			0	1	0	0	0	0	0		0	0	0	0	0	0	1	0	0	0		0	0	0	1	0	0
340	AD	Nabasanuka	0	1	1	0	0	0	0	0	1	0	1	0			0	1	0	0	0	0	0		0	0	0	0	0	0	1	0	0	0		0	0	0	1	0	0
341	AD	Nabasanuka	0	1	1	0	0	0	0	0	1	0	1	0			0	1	0	0	0	0	0		0	0	0	0	0	0	1	0	0	0		0	0	0	1	0	0
342	AD	Nabasanuka	0	1	1	0	0	0	0	0	1	0	1	0			0	1	0	0	0	0	0		0	0	0	0	0	1	0	0	0	0		0	0	0	1	0	0
343	AD	Nabasanuka	0	1	1	0	0	0	0	0	1	0	1	0			0	1	0	0	0	0	0		0	0	0	0	0	0	1	0	0	0		0	0	0	1	0	0
344	AD	Nabasanuka	0	1	1	0	0	0	0	0	1	0	1	0			0	1	0	0	0	0	0		0	0	0	0	0	0	1	0	0	0		0	0	0	1	0	0
345	AD	Nabasanuka	0	1	1	0	0	0	0	0	1	0	1	0			0	1	0	0	0	0	0		0	0	0	0	0	0	1	0	0	0		0	0	0	1	0	0
346	AD	Nabasanuka	0	1	1	0	0	0	0	0	1	0	1	0			0	1	0	0	0	0	0		0	0	0	0	0	0	1	0	0	0		0	0	0	1	0	0
347	AD	Nabasanuka	0	1	1	0	0	0	0	0	1	0	1	0			0	1	0	0	0	0	0		0	0	0	0	0	0	1	0	0	0		0	0	0	1	0	0
348	AD	Nabasanuka	0	1	1	0	0	0	1	0	2	0	1	0			0	0	0	0	0	1	0		0	0	0	0	0	0	1	0	0	0		0	0	0	1	0	0
349	AD	Nabasanuka	0	1	1	0	0	0	0	0	1	0	1	0			0	1	0	0	0	0	0		0	0	0	0	0	0	1	0	0	0		0	0	0	1	0	0
350	AD	Nabasanuka	0	1	1	0	0	0	0	0	1	0	1	0			0	1	0	0	0	0	0		0	0	0	0	0	0	1	0	0	0		0	0	0	1	0	0
351	AD	Nabasanuka	0	1	1	0	0	0	0	0	1	0	1	0			0	1	0	0	0	0	0		0	0	0	0	0	0	1	0	0	0		0	0	0	1	0	0
352	AD	Nabasanuka	0	1	1	0	0	0	0	0	1	0	1	0			0	1	0	0	0	0	0		0	0	0	0	0	0	1	0	0	0		0	0	0	1	0	0
353	AD	Nabasanuka	0	1	1	1	0	1	1	0	3	0	1	0			0	0	0	0	0	1	0		0	0	0	0	0	0	0	1	0	0		0	0	0	1	0	0
354	AD	Nabasanuka	0	1	1	0	0	0	0	0	1	0	1	0			0	1	0	0	0	0	0		0	0	0	0	0	0	1	0	0	0		0	0	0	1	0	0
355	AD	Nabasanuka	0	1	1	0	0	0	0	0	1	0	1	0			0	1	0	0	0	0	0		0	0	0	0	0	0	1	0	0	0		0	0	0	1	0	0
356	AD	Nabasanuka	0	1	1	0	0	0	1	0	2	0	1	0			0	0	0	0	0	1	0		0	0	0	0	0	1	0	0	0	0		0	0	0	1	0	0
357	AD	Nabasanuka	0	1	1	0	0	0	0	0	1	0	1	0			0	1	0	0	0	0	0		0	0	0	0	0	0	1	0	0	0		0	0	0	1	0	0
358	AD	Nabasanuka	0	1	1	0	0	0	1	0	2	0	0	0			0	0	0	0	0	1	0		0	0	0	0	0	0	1	0	0	0		0	0	0	1	0	0
359	AD	Nabasanuka	0	1	1	0	0	0	0	1	2	0	1	0			0	1	0	0	0	0	0		0	0	0	0	0	0	1	0	0	0		0	0	0	1	0	0
360	AD	Nabasanuka	0	1	1	0	0	0	0	0	1	0	1	0			0	1	0	0	0	0	0		0	0	0	0	0	0	1	0	0	0		0	0	0	1	0	0
361	AD	Nabasanuka	0	1	1	0	0	0	1	0	2	0	0	0			0	0	0	0	0	1	0		0	0	0	0	0	0	1	0	0	0		0	0	0	1	0	0

## Sheet: Others
					Profession of the head of the household										Fathers Characteristics					Waste Destination								Water Storage						Water Treatment						Tenement			Frequency of travels to the Capital of the State (Tucupita)
Mother's ID	Community	Subregion	Municipality		Teacher	Nurse	Haulier	Janitor	Trader	Rancher	Government Employee	Others (Craftsman, etc.)	Employed Individual		Paternal Age	Father's presence	Father. Spanish Proficiency	Iliterate Father		Sanitation	Open ground	Burning	Burial	River	Others	Waste Bags		Tank	Uncovered Casks	Covered Casks	Without Storage	Others		Boiled water	Filtration	Chemical: Potassium Aluminium Sulfate	Absence of water treatment practices	Others		Nuclear Familiy	Extended Family		>1 per month	1 per month	1 every 3 months	1 per year	Never		Commercial activities in other communitites
1	Isla del Muerto	PED-Manamo	PED		0	0	0	0	0	0	0	0	0		18	1	1	1		0	1	0	0	0	0	0		1	0	0	0	0		0	0	0	1	0		0	0		0	0	0	0	0		0
4	Winamorena I	PED-Manamo	PED		0	0	0	0	0	0	0	1	1		Absent & Unknown	0				0	1	0	0	0	0	0		0	1	0	0	0		0	0	0	1	0		0	0		0	0	0	0	1		0
5	Winamorena I	PED-Manamo	PED		0	0	0	0	0	0	0	0	0		22	1	1	0		0	1	0	0	0	0	0		0	1	0	0	0		0	0	0	1	0		1	1		0	0	0	0	1		0
6	Winamorena I	PED-Manamo	PED		0	0	0	0	0	0	0	0	0		35	1	1	0		0	0	0	0	1	0	0		0	0	1	0	0		0	0	0	1	0		1	1		0	0	0	0	0		1
11	Isla de Conoto	PED-Manamo	PED		0	0	0	0	0	0	0	0	0		38	0				0	1	0	0	0	0	0		0	0	1	0	0		0	0	0	1	0		0	0		0	1	0	0	0		1
12	Isla de Conoto	PED-Manamo	PED		0	0	0	0	0	0	0	0	0		45	1	1	0		0	1	0	0	0	0	0		0	1	0	0	0		0	0	0	1	0		1	1		0	0	1	0	0		0
13	Isla de Conoto	PED-Manamo	PED		0	0	0	0	0	0	0	0	0		22	1	1	1		0	1	0	0	0	0	0		0	0	1	0	0		0	0	0	1	0		1	1		0	1	0	0	0		0
14	Isla de Conoto	PED-Manamo	PED		0	0	0	0	0	0	0	0	0		27	1	1	0		0	1	0	0	0	0	0		1	0	0	0	0		0	0	0	1	0		1	1		0	0	0	0	0		0
27	Kajirina	PED-Manamo	PED		0	0	0	0	0	0	0	0	0		50	1	1	0		0	1	0	0	0	0	0		1	0	0	0	0		0	0	0	1	0		1	1		0	0	0	0	0		0
28	Morocoto	PED-Manamo	PED		0	0	0	0	0	0	0	0	0		35	1	1	0		0	0	0	0	1	0	0		0	1	0	0	0		0	0	0	1	0		1	1		0	0	0	0	0		0
29	Morocoto	PED-Manamo	PED		0	0	0	0	0	0	0	0	0		Absent & Unknown	0				0	1	0	0	0	0	0		0	0	1	0	0		0	0	0	1	0		1	1		0	0	0	0	1		0
30	Morocoto	PED-Manamo	PED		0	0	0	0	0	0	0	0	0		48	1	1	0		0	1	0	0	0	0	0		1	0	0	0	0		0	0	0	1	0		1	1		0	0	0	0	0		0
31	Morocoto	PED-Manamo	PED		0	0	0	0	0	0	1	0	1		38	1	1	1		0	1	0	0	0	0	0		0	0	1	0	0		0	0	0	1	0		1	1		0	1	0	0	0		0
32	Morocoto	PED-Manamo	PED		0	0	0	0	0	0	0	0	0		28	1	1	0		0	1	0	0	0	0	0		0	1	0	0	0		0	0	0	1	0		1	1		0	1	0	0	0		1
33	Morocoto	PED-Manamo	PED		0	0	0	0	0	0	0	0	0		56	1	1	0		0	1	0	0	0	0	0		0	0	1	0	0		0	0	0	1	0		0	0		0	0	1	0	0		0
34	Morocoto	PED-Manamo	PED		0	0	0	0	0	0	0	0	0		32	1	1	0		0	1	0	0	0	0	0		0	1	0	0	0		0	0	0	1	0		1	1		0	0	0	1	0		0
35	Morocoto	PED-Manamo	PED		0	0	0	0	0	0	0	0	0		29	1	0	0		0	1	0	0	0	0	0		1	0	0	0	0		0	0	0	1	0		0	0		0	0	0	0	0		0
36	Morocoto	PED-Manamo	PED		0	0	0	0	0	0	0	0	0		33	1	1	0		0	1	0	0	0	0	0		1	0	0	0	0		0	0	0	1	0		1	1		0	0	0	0	0		1
37	Morocoto	PED-Manamo	PED		0	0	0	0	0	0	0	0	0		28	1	0	0		0	1	0	0	0	0	0		0	1	0	0	0		0	0	0	1	0		0	0		0	0	0	0	0		0
38	Morocoto	PED-Manamo	PED		0	0	0	0	0	0	0	0	0		25	1	1	0		0	1	0	0	0	0	0		0	1	0	0	0		0	0	0	1	0		0	0		0	0	0	0	0		0
39	Wakajara de Manamo	PED-Manamo	PED		0	0	0	0	0	0	0	1	1		Absent & Unknown	0				0	1	0	0	0	0	0		0	1	0	0	0		0	0	0	1	0		0	0		0	1	0	0	0		0
40	Wakajara de Manamo	PED-Manamo	PED		0	0	0	0	0	0	0	0	0		36	1	1	0		0	1	0	0	0	0	0		0	1	0	0	0		0	0	0	1	0		0	0		0	1	0	0	0		0
41	Wakajara de Manamo	PED-Manamo	PED		0	0	0	0	0	0	0	0	0		18	1	1	1		0	1	0	0	0	0	0		0	1	0	0	0		0	0	0	1	0		0	0		0	0	0	0	0		0
42	Wakajara de Manamo	PED-Manamo	PED		0	0	1	0	0	0	0	0	1		35	1	1	0		0	1	0	0	0	0	1		0	1	0	0	0		0	0	0	1	0		1	1		0	1	0	0	0		1
43	Wakajara de Manamo	PED-Manamo	PED		0	0	0	0	0	0	0	0	0		45	1	1	1		0	1	0	0	0	0	0		0	1	0	0	0		0	0	0	1	0		0	0		0	0	0	0	1		0
44	Wakajara de Manamo	PED-Manamo	PED		0	0	0	0	0	0	1	0	1		34	1	1	1		0	1	0	0	0	0	0		0	1	0	0	0		0	0	0	1	0		0	0		0	0	1	0	0		0
45	Wakajara de Manamo	PED-Manamo	PED		0	0	0	0	0	0	0	0	0		23	1	1	1		0	1	0	0	0	0	0		0	1	0	0	0		0	0	0	1	0		1	1		0	0	1	0	0		0
46	Wakajara de Manamo	PED-Manamo	PED		0	0	0	0	0	0	0	0	0		26	1	1	0		0	1	0	0	0	0	0		0	1	0	0	0		0	0	0	1	0		0	0		0	1	0	0	0		0
47	Wakajara de Manamo	PED-Manamo	PED		0	0	0	0	0	0	0	0	0		Absent & Unknown	0				0	1	0	0	0	0	0		0	1	0	0	0		0	0	0	1	0		0	0		0	1	0	0	0		0
48	Wakajara de Manamo	PED-Manamo	PED		0	0	0	0	0	0	0	0	0		28	1	1	0		0	1	0	0	0	0	0		0	0	1	0	0		0	0	0	1	0		0	0		0	1	0	0	0		0
49	Wakajara de Manamo	PED-Manamo	PED		0	0	0	0	0	0	1	0	1		32	1	1	1		0	1	0	0	0	0	0		0	1	0	0	0		0	0	0	1	0		0	0		0	0	1	0	0		0
62	Winamorena II	PED-Manamo	PED		0	1	0	0	0	0	0	0	1		29	1	1	1		0	1	0	0	0	0	0		0	1	0	0	0		0	0	0	1	0		1	0		1	0	0	0	0		1
63	Winamorena II	PED-Manamo	PED		0	1	0	0	0	0	0	0	1		46	1	1	1		0	1	0	0	0	0	0		0	1	0	0	0		0	0	0	1	0		1	0		0	1	0	0	0		0
64	Winamorena II	PED-Manamo	PED		0	0	0	0	0	0	0	0	0		42	1	1	0		0	1	0	0	0	0	0		0	0	1	0	0		0	0	0	1	0		1	0		0	0	1	0	0		0
65	Winamorena II	PED-Manamo	PED		0	0	0	0	0	0	0	0	0		46	1	0	0		0	1	0	0	0	0	0		0	0	1	0	0		0	0	0	1	0		1	0		0	0	1	0	0		1
66	Winamorena II	PED-Manamo	PED		0	0	0	0	0	0	0	0	0		27	1	1	1		0	1	0	0	0	0	1		1	0	0	0	0		0	0	0	1	0		0	1		0	0	1	0	0		0
67	Winamorena II	PED-Manamo	PED		0	0	0	0	0	0	0	0	0		Absent & Unknown	0				0	1	0	0	0	0	1		1	0	0	0	0		0	0	0	1	0		0	1		0	0	1	0	0		0
68	Winamorena II	PED-Manamo	PED		0	0	0	0	0	0	0	0	0		35	1	1	0		0	1	0	0	0	0	1		1	0	0	0	0		0	0	0	1	0		0	1		0	0	1	0	0		0
69	Winamorena II	PED-Manamo	PED		0	0	0	0	0	0	0	0	0		32	1	1	1		0	1	0	0	0	0	0		0	0	1	0	0		0	0	0	1	0		1	0		0	0	1	0	0		0
70	Winamorena II	PED-Manamo	PED		0	0	0	0	0	0	0	0	0		42	1	1	1		0	1	0	0	0	0	0		0	1	0	0	0		0	0	0	1	0		1	0		0	0	0	0	0		0
71	Winamorena II	PED-Manamo	PED		0	0	0	0	0	0	0	0	0		64	1	1	0		0	1	0	0	0	0	0		0	1	0	0	0		0	0	0	1	0		0	1		0	0	0	0	0		0
72	Winamorena II	PED-Manamo	PED		0	0	0	0	0	0	0	0	0		Absent & Unknown	0				0	1	0	0	0	0	0		0	1	0	0	0		0	0	0	1	0		0	1		0	0	0	0	0		0
73	Winamorena II	PED-Manamo	PED		0	0	0	0	0	0	0	0	0		20	1	1	0		0	1	0	0	0	0	0		0	1	0	0	0		0	0	0	1	0		0	1		0	0	1	0	0		0
74	Winamorena II	PED-Manamo	PED		0	0	0	0	0	0	0	0	0		40	1	0	0		0	1	0	0	0	0	0		0	1	0	0	0		0	0	0	1	0		0	1		0	0	0	0	0		0
75	Winamorena II	PED-Manamo	PED		0	0	0	0	0	0	0	0	0		Absent & Unknown	0				0	1	0	0	0	0	0		0	1	0	0	0		0	0	0	1	0		1	0		0	0	0	0	1		0
76	Barrio Chino	PED-Manamo	PED		0	0	0	0	0	0	0	0	0		58	1	1	0		1	0	0	0	0	0	1		1	0	0	0	0		0	0	0	1	0		0	0		0	0	1	0	0		0
77	Barrio Chino	PED-Manamo	PED		0	0	0	0	0	0	0	0	0		73	1	1	0		1	0	0	0	0	0	1		1	0	0	0	0		0	0	0	1	0		0	0		0	0	1	0	0		0
78	Barrio Chino	PED-Manamo	PED		0	0	0	0	0	0	0	0	0		Absent & Unknown	0				1	0	0	0	0	0	1		0	1	0	0	0		0	0	0	1	0		0	0		1	0	0	0	0		0
79	Barrio Chino	PED-Manamo	PED		0	0	0	0	0	0	1	0	1		29	1	1	0		1	0	0	0	0	0	1		0	1	0	0	0		0	0	0	1	0		0	0		0	0	0	0	0		0
80	Barrio Chino	PED-Manamo	PED		0	0	0	0	0	0	0	0	0		40	1	1	0		1	0	0	0	0	0	1		0	1	0	0	0		0	0	0	1	0		0	0		0	0	0	0	1		0
81	Barrio Chino	PED-Manamo	PED		0	0	0	0	0	0	0	0	0		28	1	1	1		0	1	0	0	0	0	0		0	0	1	0	0		0	0	0	1	0		0	0		0	0	0	0	1		0
82	Barrio Chino	PED-Manamo	PED		0	0	0	0	0	0	0	0	0		40	1	1	0		1	0	0	0	0	0	1		1	0	0	0	0		0	0	1	0	0		1	1		0	0	0	0	1		1
83	Barrio Chino	PED-Manamo	PED		0	0	0	0	0	0	1	0	1		28	1	1	1		1	0	0	0	0	0	1		0	0	1	0	0		0	0	0	1	0		1	1		0	0	0	0	0		0
84	Barrio Chino	PED-Manamo	PED		0	0	0	0	0	0	1	0	1		53	1	1	0		0	1	0	0	0	0	1		0	0	1	0	0		0	0	0	1	0		0	0		0	0	0	0	0		0
85	Barrio Chino	PED-Manamo	PED		0	0	0	0	0	0	0	0	0		27	1	1	0		0	1	0	0	0	0	1		0	0	1	0	0		0	0	0	1	0		0	0		0	0	0	0	0		0
86	Barrio Chino	PED-Manamo	PED		0	0	0	0	0	0	0	0	0		40	1	1	1		0	1	0	0	0	0	1		0	0	1	0	0		0	0	0	1	0		0	0		0	0	0	0	1		1
87	Barrio Chino	PED-Manamo	PED		0	0	0	0	0	0	0	0	0		29	1	1	1		0	1	0	0	0	0	1		0	0	1	0	0		0	0	0	1	0		0	0		0	0	0	0	1		1
88	Barrio Chino	PED-Manamo	PED		0	0	0	0	0	0	1	0	1		37	1	1	1		0	1	0	0	0	0	0		0	0	1	0	0		0	0	0	1	0		1	1		0	0	1	0	0		0
89	Barrio Chino	PED-Manamo	PED		0	0	0	0	0	0	0	0	0		25	1	1	0		0	1	0	0	0	0	0		0	0	1	0	0		0	0	0	1	0		1	1		0	0	0	0	1		0
90	Barrio Chino	PED-Manamo	PED		0	1	0	0	0	0	0	0	1		21	1	1	1		0	1	0	0	0	0	0		0	0	1	0	0		0	0	0	1	0		1	1		0	0	0	0	1		0
91	La Culebrita	PED-Manamo	PED		0	0	0	0	0	0	0	0	0		29	1	1	0		0	1	0	0	0	0	0		0	1	0	0	0		0	0	0	1	0		0	0		0	1	0	0	0		0
92	La Culebrita	PED-Manamo	PED		0	0	0	0	0	0	0	0	0		34	1	0	0		0	1	0	0	0	0	0		0	1	0	0	0		0	0	0	1	0		0	0		0	0	0	0	0		0
93	La Culebrita	PED-Manamo	PED		0	0	0	0	0	0	0	0	0		36	1	0	0		0	1	0	0	0	0	0		0	1	0	0	0		0	0	0	1	0		1	1		0	0	0	0	0		0
94	La Culebrita	PED-Manamo	PED		0	0	0	0	0	0	0	0	0		20	1	1	0		0	1	0	0	0	0	0		0	1	0	0	0		0	0	0	1	0		0	0		0	0	0	0	0		0
95	Isla Misteriosa	PED-Manamo	PED		0	0	0	0	0	0	0	0	0		27	1	1	1		0	1	0	0	0	0	0		1	0	0	0	0		0	0	0	1	0		0	1		0	0	1	0	0		0
96	Isla Misteriosa	PED-Manamo	PED		0	0	0	0	0	0	0	0	0		45	1	1	0		0	1	0	0	0	0	0		1	0	0	0	0		0	0	0	1	0		0	1		0	0	1	0	0		0
97	Isla Misteriosa	PED-Manamo	PED		0	0	0	0	0	0	1	0	1		41	1	1	1		0	1	0	0	0	0	0		1	0	0	0	0		0	0	0	1	0		0	1		0	1	0	0	0		0
98	Isla Misteriosa	PED-Manamo	PED		0	0	0	0	0	0	0	0	0		47	1	1	0		0	1	0	0	0	0	0		1	0	0	0	0		0	0	0	1	0		1	0		0	0	0	1	0		0
2	Najakaina	PED-Waranoko	PED		0	0	0	0	0	0	0	0	0		46	1	0	0		0	1	0	0	0	0	0		0	1	0	0	0		0	0	0	1	0		0	0		0	0	1	0	0		0
3	Najakaina	PED-Waranoko	PED		0	0	0	0	0	0	0	0	0		Unknown	1	0	0		0	1	0	0	0	0	0		0	1	0	0	0		0	0	0	1	0		0	0		0	0	0	0	1		0
7	Jagüey de los Cocos	PED-Waranoko	PED		0	0	0	0	0	0	0	0	0		26	1	1	1		0	1	0	0	0	0	0		0	1	0	0	0		0	0	0	1	0		0	0		0	0	0	1	0		0
8	Jagüey de los Cocos	PED-Waranoko	PED		0	0	0	0	0	0	0	0	0		40	1	0	0		0	1	0	0	0	0	0		0	1	0	0	0		0	0	0	1	0		0	0		0	0	0	1	0		0
9	Jagüey de los Cocos	PED-Waranoko	PED		0	0	0	0	0	0	0	0	0		23	1	0	0		0	1	0	0	0	0	0		0	1	0	0	0		0	0	0	1	0		0	0		0	0	0	1	0		0
10	Jagüey de los Cocos	PED-Waranoko	PED		0	0	0	0	0	0	0	0	0		35	1	1	0		0	1	0	0	0	0	0		0	1	0	0	0		0	0	0	1	0		0	0		0	0	0	1	0		0
15	Simoina	PED-Waranoko	PED		0	0	0	0	0	0	0	0	0		82	1	0	0		0	1	0	0	0	0	0		1	1	0	0	0		0	0	0	1	0		0	0		0	0	0	0	1		0
16	Simoina	PED-Waranoko	PED		0	0	0	0	0	0	0	0	0		33	1	0	0		0	1	0	0	0	0	0		0	1	0	0	0		0	0	0	1	0		1	1		0	1	0	0	0		0
17	Simoina	PED-Waranoko	PED		0	0	0	0	0	0	0	0	0		38	1	1	0		0	1	0	0	0	0	0		0	0	1	0	0		0	0	0	1	0		1	1		0	0	0	0	0		0
18	Simoina	PED-Waranoko	PED		0	0	0	0	0	0	0	0	0		35	1	0	0		0	1	0	0	0	0	0		0	1	0	0	0		0	0	0	1	0		0	0		0	0	0	0	0		0
19	Simoina	PED-Waranoko	PED		0	0	0	0	0	0	0	0	0		63	1	1	0		0	1	0	0	0	0	0		1	0	0	0	0		0	0	0	1	0		0	0		0	0	0	0	0		0
20	Kajirina	PED-Waranoko	PED		0	0	0	0	0	0	0	0	0		Absent & Unknown	0				0	1	0	0	0	0	0		0	1	0	0	0		0	0	0	1	0		1	1		0	0	0	0	1		0
21	Kajirina	PED-Waranoko	PED		0	0	0	0	0	0	0	0	0		28	1	1	0		0	1	0	0	0	0	0		0	1	0	0	0		0	0	0	1	0		1	1		0	0	1	0	0		0
22	Kajirina	PED-Waranoko	PED		0	0	0	0	0	0	0	0	0		Absent & Unknown	0				0	1	0	0	0	0	0		0	1	0	0	0		0	0	0	1	0		0	0		0	0	0	0	0		0
23	Kajirina	PED-Waranoko	PED		0	0	0	0	0	0	0	0	0		27	1	0	0		0	1	0	0	0	0	0		0	1	0	0	0		0	0	0	1	0		0	0		0	0	0	0	0		0
24	Kajirina	PED-Waranoko	PED		0	0	0	0	0	0	0	0	0		50	1	0	0		0	1	0	0	0	0	0		1	0	0	0	0		0	0	0	1	0		1	1		0	0	0	0	0		0
25	Kajirina	PED-Waranoko	PED		0	0	0	0	0	0	0	0	0		37	1	0	0		0	1	0	0	0	0	0		0	1	0	0	0		0	0	0	1	0		0	0		0	0	0	0	1		0
26	Kajirina	PED-Waranoko	PED		0	0	0	0	0	0	0	0	0		25	1	0	0		0	1	0	0	0	0	0		1	0	0	0	0		0	0	0	1	0		0	0		0	0	0	0	1		0
50	Waranoko II	PED-Waranoko	PED		0	0	0	0	0	0	0	0	0		47	1	1	0		0	1	0	0	0	0	0		0	1	0	0	0		0	0	0	1	0		0	0		0	0	0	0	1		0
51	Waranoko II	PED-Waranoko	PED		0	0	0	0	0	0	0	0	0		32	1	0	0		0	1	0	0	0	0	0		0	1	0	0	0		0	0	0	1	0		0	0		0	0	0	0	1		0
52	Waranoko II	PED-Waranoko	PED		0	0	0	0	0	0	0	0	0		54	1	0	0		0	1	0	0	0	0	0		0	1	0	0	0		0	0	0	1	0		0	0		0	0	0	0	1		0
53	Waranoko II	PED-Waranoko	PED		0	0	0	0	0	0	0	0	0		54	1	0	0		0	1	0	0	0	0	0		0	1	0	0	0		0	0	0	1	0		0	0		0	0	0	0	1		0
54	Waranoko II	PED-Waranoko	PED		0	0	0	0	0	0	0	0	0		28	1	1	1		0	1	0	0	0	0	0		1	0	0	0	0		0	0	0	1	0		0	0		0	0	1	0	0		1
55	Waranoko II	PED-Waranoko	PED		0	0	0	0	0	0	0	0	0		36	1	0	0		0	1	0	0	0	0	0		1	0	0	0	0		0	0	0	1	0		1	1		0	0	0	0	0		0
56	Waranoko II	PED-Waranoko	PED		0	0	0	0	0	0	0	0	0		29	1	0	0		0	1	0	0	0	0	0		0	0	1	0	0		0	0	0	1	0		1	1		0	0	0	0	1		0
57	Waranoko II	PED-Waranoko	PED		0	0	0	0	0	0	0	0	0		32	1	0	0		0	1	0	0	0	0	0		0	1	0	0	0		0	0	0	1	0		0	0		0	0	0	0	0		0
58	Waranoko II	PED-Waranoko	PED		0	0	0	0	0	0	0	0	0		29	1	1	0		0	1	0	0	0	0	0		0	1	0	0	0		0	0	0	1	0		0	0		0	0	0	0	0		0
59	Waranoko II	PED-Waranoko	PED		0	0	0	0	0	0	0	0	0		18	1	0	0		0	1	0	0	0	0	0		0	1	0	0	0		0	0	0	1	0		0	0		0	0	0	0	1		0
60	Waranoko II	PED-Waranoko	PED		0	0	0	0	0	0	0	0	0		29	1	1	0		0	1	0	0	0	0	0		0	1	0	0	0		0	0	0	1	0		0	0		1	0	0	0	0		0
61	Waranoko II	PED-Waranoko	PED		0	0	0	0	0	0	0	0	0		27	1	0	0		0	1	0	0	0	0	0		0	1	0	0	0		0	0	0	1	0		1	1		0	0	0	0	1		0
1	Cojina II	Makareo-Mariusa	TUC		0	0	0	0	0	0	0	0	0		45	1	0	1		0	1	0	0	1	0	0		0	1	0	0	0		0	0	0	1	0		1	0		0	0	1	0	0		0
2	Nabasanuka de Makareo	Makareo-Mariusa	TUC		0	0	0	0	0	0	0	0	0		45	1	1	1		0	1	0	0	0	0	0		1	0	0	0	0		0	0	0	1	0		1	0		0	0	0	1	0		0
4	Isla de Tucupita	Makareo-Mariusa	TUC		0	0	0	0	0	0	0	0	0		41	1	1	0		0	1	0	0	0	0	0		0	1	0	0	0		0	0	0	1	0		0	1		0	0	1	0	0		0
5	Isla de Tucupita	Makareo-Mariusa	TUC		0	0	0	0	0	0	0	0	0		Unknown	1	1	0		0	1	0	0	0	0	0		0	1	0	0	0		0	0	0	1	0		0	1		0	0	1	0	0		0
13	La Lagunita de Mariusa	Makareo-Mariusa	TUC		0	0	0	0	0	0	0	0	0		Absent & Unknown	0				0	0	0	0	1	0	0		0	0	1	0	0		0	0	0	1	0		0	1		0	0	0	0	1		1
14	La Lagunita de Mariusa	Makareo-Mariusa	TUC		0	0	0	0	0	0	0	0	0		79	1	0	0		0	0	0	0	1	0	0		0	0	1	0	0		0	0	0	1	0		0	1		0	0	0	0	1		1
15	La Lagunita de Mariusa	Makareo-Mariusa	TUC		0	0	0	0	0	0	0	0	0		33	1	1	1		0	0	0	0	1	0	0		0	0	1	0	0		0	0	0	1	0		0	1		0	0	0	0	1		1
16	La Lagunita de Mariusa	Makareo-Mariusa	TUC		0	0	0	0	0	0	0	0	0		28	1	1	0		0	0	0	0	1	0	0		0	0	1	0	0		0	0	0	1	0		0	1		0	0	0	0	1		1
17	La Lagunita de Mariusa	Makareo-Mariusa	TUC		0	0	0	0	0	0	0	0	0		32	1	1	0		0	1	0	0	0	0	0		0	1	0	0	0		0	0	0	1	0		0	1		0	0	0	1	0		1
18	La Lagunita de Mariusa	Makareo-Mariusa	TUC		0	0	0	0	0	0	0	0	0		20	1	0	0		0	1	0	0	0	0	0		0	1	0	0	0		0	0	0	1	0		0	1		0	0	0	1	0		1
19	La Lagunita de Mariusa	Makareo-Mariusa	TUC		0	0	0	0	0	0	0	0	0		25	1	0	0		0	0	0	0	1	0	0		0	0	1	0	0		0	0	0	1	0		0	1		0	0	0	0	1		1
20	La Lagunita de Mariusa	Makareo-Mariusa	TUC		0	0	0	0	0	0	0	0	0		21	1	1	0		0	0	0	0	1	0	0		0	0	1	0	0		0	0	0	1	0		0	1		0	1	0	0	0		1
21	La Lagunita de Mariusa	Makareo-Mariusa	TUC		0	0	0	0	0	0	0	0	0		36	1	1	0		0	0	0	0	1	0	0		0	0	1	0	0		0	0	0	1	0		0	1		0	0	0	0	1		1
31	Punta Pescador	Makareo-Mariusa	TUC		0	0	0	0	0	0	0	0	0		26	1	1	1		0	0	0	0	1	0	0		0	1	0	0	0		0	0	0	1	0		1	0		1	0	0	0	0		1
32	Punta Pescador	Makareo-Mariusa	TUC		0	0	0	0	0	0	0	0	0		30	1	1	1		0	0	0	0	1	0	0		0	0	1	0	0		0	0	0	1	0		0	1		0	1	0	0	0		1
33	Punta Pescador	Makareo-Mariusa	TUC		0	0	0	0	0	0	0	0	0		62	1	1	0		0	0	0	0	1	0	0		0	1	0	0	0		0	0	0	1	0		0	1		0	1	0	0	0		1
34	Punta Pescador	Makareo-Mariusa	TUC		0	0	0	0	0	0	0	0	0		45	1	1	0		0	0	0	0	1	0	0		1	0	0	0	0		0	0	0	1	0		1	0		0	0	0	1	0		1
35	Punta Pescador	Makareo-Mariusa	TUC		0	0	0	0	0	0	0	0	0		27	1	1	0		0	0	0	0	1	0	0		1	0	0	0	0		0	0	0	1	0		1	0		1	0	0	0	0		0
36	Punta Pescador	Makareo-Mariusa	TUC		0	0	0	0	0	0	0	0	0		55	1	1	0		0	0	0	0	1	0	0		0	1	0	0	0		0	0	0	1	0		1	0		0	0	0	0	1		0
37	Punta Pescador	Makareo-Mariusa	TUC		0	0	0	0	0	0	0	0	0		19	1	0	0		0	0	0	0	1	0	0		0	1	0	0	0		0	0	0	1	0		0	1		0	0	0	0	0		0
38	Punta Pescador	Makareo-Mariusa	TUC		0	0	0	0	0	0	0	0	0		58	1	0	0		0	0	0	0	1	0	0		0	1	0	0	0		0	0	0	1	0		0	1		0	0	0	0	0		0
39	Punta Pescador	Makareo-Mariusa	TUC		0	0	0	0	0	0	0	0	0		35	1	1	0		0	0	0	0	1	0	0		0	0	1	0	0		0	0	0	1	0		1	0		0	1	0	0	0		1
40	Punta Pescador	Makareo-Mariusa	TUC		0	0	0	0	0	0	0	0	0		45	1	1	0		0	0	0	0	1	0	0		0	0	0	1	0		0	0	0	1	0		1	0		0	1	0	0	1		1
41	Punta Pescador	Makareo-Mariusa	TUC		0	0	0	0	0	0	0	0	0		Absent & Unknown	0				0	0	0	0	1	0	0		0	1	0	0	0		0	0	0	1	0		0	1		0	0	0	0	0		0
42	Punta Pescador	Makareo-Mariusa	TUC		0	0	0	0	0	0	0	0	0		41	1	0	0		0	0	0	0	1	0	0		0	0	1	0	0		0	0	0	1	0		0	1		0	0	0	0	0		0
43	Punta Pescador	Makareo-Mariusa	TUC		0	0	0	0	0	0	0	0	0		21	1	1	0		0	0	0	0	1	0	0		0	1	0	0	0		0	0	0	1	0		1	0		0	0	0	0	0		0
44	Punta Pescador	Makareo-Mariusa	TUC		0	0	0	0	0	0	0	0	0		30	1	1	0		0	0	0	0	1	0	0		0	1	0	0	0		0	0	0	1	0		1	0		0	0	1	0	0		1
67	Mariusa	Makareo-Mariusa	TUC		1	0	0	0	0	0	0	0	1		31	1	1	1		0	1	0	0	0	0	0		0	0	1	0	0		0	0	0	1	0		1	0		0	1	0	0	0		1
68	Mariusa	Makareo-Mariusa	TUC		0	0	0	0	0	0	0	0	0		20	1	0	0		0	0	0	0	1	0	0		0	1	0	0	0		0	0	0	1	0		0	1		0	1	0	0	0		1
69	Mariusa	Makareo-Mariusa	TUC		0	0	0	0	0	0	0	0	0		45	1	1	0		0	0	0	0	1	0	0		0	1	0	0	0		0	0	0	1	0		0	1		0	1	0	0	0		1
70	Mariusa	Makareo-Mariusa	TUC		0	0	0	0	0	0	0	0	0		25	1	1	0		0	0	0	0	1	0	0		0	1	0	0	0		0	0	0	1	0		0	1		0	1	0	0	0		1
71	Mariusa	Makareo-Mariusa	TUC		0	0	0	0	0	0	0	0	0		45	1	1	0		0	0	0	0	1	0	0		0	1	0	0	0		0	0	0	1	0		0	1		0	1	0	0	0		1
72	Mariusa	Makareo-Mariusa	TUC		0	0	0	0	0	0	0	0	0		42	0				0	0	0	0	1	0	0		0	0	1	0	0		0	0	0	1	0		0	1		0	0	1	0	0		1
73	Mariusa	Makareo-Mariusa	TUC		0	0	0	0	0	0	0	0	0		60	1	0	0		0	0	0	0	1	0	0		0	0	1	0	0		0	0	0	1	0		0	1		0	0	1	0	0		1
74	Mariusa	Makareo-Mariusa	TUC		0	0	0	0	0	0	0	0	0		39	1	0	0		0	0	0	0	1	0	0		0	0	1	0	0		0	0	0	1	0		0	1		0	0	1	0	0		1
75	Mariusa	Makareo-Mariusa	TUC		0	0	0	0	0	0	0	0	0		71	1	0	1		0	0	0	0	1	0	0		0	0	1	0	0		0	0	0	1	0		0	1		0	1	0	0	0		1
76	Mariusa	Makareo-Mariusa	TUC		0	0	0	0	0	0	0	0	0		37	1	1	0		0	0	0	0	1	0	0		0	0	1	0	0		0	0	0	1	0		0	1		0	1	0	0	0		1
77	Mariusa	Makareo-Mariusa	TUC		0	0	0	0	0	0	0	0	0		Absent & Unknown	0				0	0	0	0	1	0	0		0	0	1	0	0		0	0	0	1	0		0	1		0	1	0	0	0		1
78	Mariusa	Makareo-Mariusa	TUC		0	1	0	0	0	0	0	0	1		24	1	0	0		0	0	0	0	1	0	0		0	0	1	0	0		0	0	0	1	0		0	1		0	1	0	0	0		1
79	Mariusa	Makareo-Mariusa	TUC		0	0	0	0	0	0	0	0	0		32	1	0	0		0	0	0	0	1	0	0		0	1	0	0	0		0	0	0	1	0		0	1		0	1	0	0	0		0
80	Mariusa	Makareo-Mariusa	TUC		0	0	0	0	0	0	1	0	1		51	1	1	0		0	0	0	0	1	0	0		0	1	0	0	0		0	0	0	1	0		0	1		0	1	0	0	0		0
81	Mariusa	Makareo-Mariusa	TUC		0	0	0	0	0	0	0	0	0		Absent & Unknown	0				0	0	0	0	1	0	0		0	1	0	0	0		0	0	0	1	0		0	1		0	1	0	0	0		0
82	Mariusa	Makareo-Mariusa	TUC		0	0	0	0	0	0	0	0	0		38	1	1	0		0	0	0	0	1	0	0		0	0	1	0	0		0	0	0	1	0		0	1		0	1	0	0	0		1
83	Mariusa	Makareo-Mariusa	TUC		0	0	0	0	0	0	0	0	0		Unknown	1	0	0		0	0	0	0	1	0	0		0	0	1	0	0		0	0	0	1	0		0	1		0	1	0	0	0		1
84	Mariusa	Makareo-Mariusa	TUC		0	0	0	0	0	0	0	0	0		75	1	1	0		0	0	0	0	1	0	0		0	0	1	0	0		0	0	0	1	0		0	1		0	1	0	0	0		1
85	Mariusa	Makareo-Mariusa	TUC		0	0	0	0	0	0	0	0	0		15	1	1	1		0	0	0	0	1	0	0		0	0	1	0	0		0	0	0	1	0		0	1		0	0	1	0	0		1
86	Mariusa	Makareo-Mariusa	TUC		0	0	0	0	0	0	0	0	0		65	1	1	0		0	0	0	0	1	0	0		0	0	1	0	0		0	0	0	1	0		0	1		0	0	1	0	0		1
87	Mariusa	Makareo-Mariusa	TUC		0	0	0	0	0	0	0	0	0		40	1	1	0		0	0	0	0	1	0	0		0	0	1	0	0		0	0	0	1	0		0	1		0	0	0	0	0		1
88	Mariusa	Makareo-Mariusa	TUC		0	0	0	0	0	0	0	0	0		40	1	1	0		0	0	0	0	1	0	0		0	0	1	0	0		0	0	0	1	0		0	1		0	0	0	0	0		1
89	Mariusa	Makareo-Mariusa	TUC		1	0	0	0	0	0	0	0	1		20	1	1	1		0	0	0	0	1	0	0		0	1	0	0	0		0	0	0	1	0		0	1		0	1	0	0	0		1
90	Mariusa	Makareo-Mariusa	TUC		0	0	0	0	0	0	0	0	0		25	1	1	0		0	0	0	0	1	0	0		0	1	0	0	0		0	0	0	1	0		0	1		0	1	0	0	0		1
91	Mariusa	Makareo-Mariusa	TUC		0	0	0	0	0	0	0	0	0		24	1	1	1		0	0	0	0	1	0	0		0	1	0	0	0		0	0	0	1	0		0	1		0	1	0	0	0		1
6	Yacariyene	Alto Delta	TUC		0	0	0	0	0	0	0	0	0		30	0				0	1	0	0	0	0			0	1	0	0	0		0	0	0	1	0		1	0		1	0	0	0	0		0
7	Yacariyene	Alto Delta	TUC		0	0	0	0	0	0	1	0	1		40	1	1	1		0	1	0	0	0	0			0	1	0	0	0		0	0	0	1	0		0	1		1	0	0	0	0		1
8	Yacariyene	Alto Delta	TUC		0	0	0	0	0	0	0	0	0		39	1	1	1		0	1	0	0	0	0			0	1	0	0	0		0	0	0	1	0		1	0		1	0	0	0	0		0
9	Yacariyene	Alto Delta	TUC		0	0	0	0	0	0	0	0	0		28	1	1	1		0	1	0	0	0	0			0	1	0	0	0		0	0	0	1	0		1	0		1	0	0	0	0		0
10	Yacariyene	Alto Delta	TUC		0	0	0	0	0	0	0	0	0		32	1	1	1		0	1	0	0	0	0			0	1	0	0	0		0	0	0	1	0		0	1		1	0	0	0	0		0
11	Yacariyene	Alto Delta	TUC		0	0	0	0	0	0	0	0	0		33	1	1	1		0	1	0	0	0	0			0	1	0	0	0		0	0	0	1	0		0	1		1	0	0	0	0		0
12	Yacariyene	Alto Delta	TUC		0	0	0	0	0	0	0	0	0		29	1	1	1		0	1	0	0	0	0			0	1	0	0	0		0	0	0	1	0		1	0		1	0	0	0	0		1
22	Janokosebe	Alto Delta	TUC		0	0	0	0	0	0	0	0	0		48	1	1	0		1	0	0	0	0	0	0		1	0	0	0	0		0	0	0	1	0		0	1		1	0	0	0	0		1
23	Janokosebe	Alto Delta	TUC		0	0	0	0	0	0	0	0	0		27	1	1	1		1	0	0	0	0	0	0		1	0	0	0	0		0	0	0	1	0		0	1		1	0	0	0	0		1
24	Janokosebe	Alto Delta	TUC		0	0	0	0	0	0	0	0	0		40	1	1	0		1	0	0	0	0	0	1		1	0	0	0	0		0	0	0	1	0		1	0		1	0	0	0	0		0
25	Janokosebe	Alto Delta	TUC		0	0	0	0	0	0	0	0	0		42	1	1	1		1	0	0	0	0	0	1		1	0	0	0	0		0	0	0	1	0		1	0		1	0	0	0	0		0
26	Janokosebe	Alto Delta	TUC		0	0	0	0	0	0	0	0	0		37	1	1	1		1	0	0	0	0	0	1		1	0	0	0	0		0	0	0	1	0		0	1		1	0	0	0	0		0
27	Janokosebe	Alto Delta	TUC		1	0	0	0	0	0	0	0	1		27	1	1	1		1	0	0	0	0	0	1		1	0	0	0	0		0	0	0	1	0		0	1		1	0	0	0	0		1
28	Janokosebe	Alto Delta	TUC		0	0	0	0	0	0	0	0	0		27	1	1	1		0	0	0	1	0	0	0		1	0	0	0	0		0	0	0	1	0		0	1		1	0	0	0	0		0
29	Janokosebe	Alto Delta	TUC		0	0	0	0	0	0	0	0	0		45	1	1	1		1	0	0	0	0	0	1		1	0	0	0	0		0	0	0	1	0		1	0		1	0	0	0	0		0
30	Janokosebe	Alto Delta	TUC		0	0	0	0	0	0	0	0	0		35	1	1	1		1	0	0	0	0	0	1		1	0	0	0	0		0	0	0	1	0		1	0		1	0	0	0	0		0
45	Volcán	Alto Delta	TUC		0	0	1	0	0	0	0	0	1		31	1	1	1		0	1	0	0	0	0			0	1	0	0	0		0	0	0	1	0		1	0		1	0	0	0	0		0
46	Volcán	Alto Delta	TUC		0	0	0	0	0	0	0	0	0		48	1	1	1		0	1	0	0	1	0			0	1	0	0	0		0	0	1	0	0		0	1		1	0	0	0	0		1
47	Volcán	Alto Delta	TUC		0	0	0	0	0	0	0	0	0		31	1	1	0		0	1	0	0	1	0			0	1	0	0	0		0	0	1	0	0		0	1		1	0	0	0	0		1
48	Volcán	Alto Delta	TUC		0	0	0	0	0	0	0	0	0		45	1	1	1		0	1	0	0	1	0			0	1	0	0	0		0	0	1	0	0		0	1		1	0	0	0	0		1
49	Volcán	Alto Delta	TUC		0	0	0	0	0	0	0	0	0		55	1	1	1		0	1	0	0	0	0			0	1	0	0	0		0	0	1	0	0		1	0		1	0	0	0	0		1
50	Volcán	Alto Delta	TUC		0	0	0	0	0	0	0	0	0		29	1	1	1		0	1	0	0	0	0			0	1	0	0	0		0	0	1	0	0		1	0		1	0	0	0	0		1
51	Volcán	Alto Delta	TUC		0	0	0	0	0	0	0	0	0		34	1	1	1		0	1	0	0	0	0			0	1	0	0	0		0	0	1	0	0		1	0		1	0	0	0	0		0
52	Volcán	Alto Delta	TUC		0	0	0	0	0	0	0	0	0		55	1	1	0		0	1	0	0	0	0			0	1	0	0	0		0	0	1	0	0		1	0		1	0	0	0	0		0
53	Volcán	Alto Delta	TUC		0	0	0	0	0	0	0	0	0		53	1	1	0		0	1	0	0	0	0			0	1	0	0	0		0	0	1	0	0		0	1		1	0	0	0	0		1
54	Volcán	Alto Delta	TUC		0	0	0	0	0	0	0	0	0		48	0				0	1	0	0	0	0			0	1	0	0	0		0	0	1	0	0		0	1		0	0	1	0	0		0
55	Volcán	Alto Delta	TUC		0	0	0	0	0	0	0	0	0		41	0				0	1	0	0	0	0			0	1	0	0	0		0	0	1	0	0		0	1		1	0	0	0	0		0
56	Volcán	Alto Delta	TUC		0	0	0	0	0	0	0	0	0		35	1	1	1		0	1	0	0	0	0			0	1	0	0	0		0	0	1	0	0		0	1		1	0	0	0	0		0
57	Volcán	Alto Delta	TUC		0	0	0	0	0	0	0	0	0		36	1	0	0		0	1	0	0	0	0			0	1	0	0	0		0	0	1	0	0		0	1		1	0	0	0	0		0
58	Volcán	Alto Delta	TUC		0	0	0	0	0	0	0	0	0		45	1	1	1		0	1	0	0	0	0			0	1	0	0	0		0	0	1	0	0		1	0		1	0	0	0	0		1
59	Volcán	Alto Delta	TUC		0	0	0	0	0	0	0	0	0		25	1	1	0		0	1	0	0	0	0			0	1	0	0	0		0	0	1	0	0		0	1		1	0	0	0	0		0
60	Volcán	Alto Delta	TUC		0	0	0	0	0	0	0	0	0		26	1	1	0		0	1	0	0	0	0			0	1	0	0	0		0	0	1	0	0		0	1		1	0	0	0	0		0
61	Volcán	Alto Delta	TUC		0	0	0	0	0	0	0	0	0		37	1	1	0		0	1	0	0	0	0			0	1	0	0	0		0	0	1	0	0		1	0		0	1	0	0	0		0
62	Volcán	Alto Delta	TUC		0	0	0	0	0	0	0	0	0		56	1	1	1		0	1	0	0	0	0			0	1	0	0	0		0	0	1	0	0		1	0		1	0	0	0	0		0
63	Volcán	Alto Delta	TUC		0	0	0	0	0	0	0	0	0		51	1	1	0		0	1	0	0	0	0			0	1	0	0	0		0	0	1	0	0		0	1		1	0	0	0	0		0
64	Volcán	Alto Delta	TUC		1	0	0	0	0	0	0	0	1		32	0				0	1	0	0	0	0			0	1	0	0	0		0	0	1	0	0		0	1		1	0	0	0	0		0
65	Volcán	Alto Delta	TUC		0	0	0	0	0	0	0	0	0		25	0				0	1	0	0	0	0			0	1	0	0	0		0	0	1	0	0		0	1		0	0	1	0	0		0
66	Volcán	Alto Delta	TUC		0	0	0	0	0	0	0	0	0		26	1	1	1		0	1	0	0	0	0			0	1	0	0	0		0	0	1	0	0		0	1		1	0	0	0	0		0
500	Santa Rosa de Araguao	Alto Delta	TUC		0	0	0	0	0	0	0	0	0		53	0				0	1	0	0	1	0	0		0	1	0	0	0		0	0	0	1	0		1	0		0	1	0	0	0		0
1	Kabiajoko	Guayo	AD		0	0	0	0	0	0	0	0	0		29	1	0	0		0	1	0	0	0	0	0		0	0	0	1	0		0	0	0	1	0		1	0
2	Burojoida	Guayo	AD		0	0	0	0	0	0	0	0	0		44	1	0	0		0	1	0	0	0	0	0		0	0	0	1	0		0	0	0	1	0		0	1
6	Dajumana	Guayo	AD		0	0	0	0	0	0	0	0	0		Unknown	1	1	1		0	1	0	0	0	0	0		0	0	1	0	0		0	0	0	1	0		0	1		0	0	1	0	0		0
7	Hanakasi	Guayo	AD		0	0	0	0	0	0	0	0	0		48	1	1	1		0	1	0	0	0	0	0		0	1	0	0	0		0	0	0	1	0		1	0		0	1	0	0	0		1
8	Wanoko	Guayo	AD		0	0	0	0	0	0	0	0	0		29	0				0	1	0	0	0	0	0		0	0	1	0	0		0	0	0	1	0		1	0		0	0	0	0	1		0
9	Guayaboroina	Guayo	AD		0	0	0	0	0	0	0	0	0		36	1	0	0		0	1	0	0	0	0	0		0	0	0	1	0		0	0	0	1	0		1	0		0	1	0	0	0		1
13	Jarijidoina	Guayo	AD		0	0	0	0	0	0	0	0	0		35	1	1	0		0	0	0	0	1	0	0		0	1	0	0	0		1	0	0	0	0		1	0		0	0	0	0	1		1
14	Jarijidoina	Guayo	AD		0	0	0	0	0	0	0	0	0		53	1	0	0		0	1	0	0	0	0	0		0	1	0	0	0		0	0	0	1	0		1	0		0	1	0	0	0		0
15	Ibute	Guayo	AD		0	0	0	0	0	0	0	0	0		38	1	1	0		0	0	0	0	1	0	0		0	0	0	1	0		0	0	0	1	0		1	0		0	0	1	0	0		0
16	Ibute	Guayo	AD		0	0	0	0	0	0	0	0	0		Unknown	1	1	1		0	0	0	0	1	0	0		0	1	0	0	0		0	0	0	1	0		0	1		0	0	0	0	0		0
17	Boca de Cojina	Guayo	AD		0	0	0	0	0	0	0	0	0		Unknown	1	0	0		0	1	0	0	0	0	0		0	1	0	0	0		0	0	0	1	0		1	0		0	0	0	0	1		0
18	Boca de Cojina	Guayo	AD		0	0	0	0	0	0	0	0	0		21	1	1	1		0	0	0	0	1	0	0		0	1	0	0	0		0	0	0	1	0		1	0		0	0	0	0	1		0
19	Ajanocoida	Guayo	AD		0	0	0	0	0	0	0	0	0		32	1	0	0		0	1	0	0	0	0	0		0	1	0	0	0		0	0	0	1	0		1	0		0	0	0	1	0		1
20	Ajanocoida	Guayo	AD		0	0	0	0	0	0	0	0	0		38	1	0	0		0	0	0	0	1	0	0		0	1	0	0	0		0	0	0	1	0		1	0		0	0	0	1	0		1
21	Jioruina	Guayo	AD		0	0	0	0	0	0	0	0	0		36	1	1	1		0	1	0	0	0	0	0		0	1	0	0	0		0	0	0	1	0		0	1		0	1	0	0	0		0
22	Jioruina	Guayo	AD		0	0	0	0	0	0	0	0	0		25	1	0	1		0	1	0	0	0	0	0		0	1	0	0	0		0	0	0	1	0		0	1		0	1	0	0	0		0
23	Joroeneina	Guayo	AD		0	0	0	0	0	0	0	0	0		61	1	0	0		0	1	0	0	0	0	0		0	0	0	1	0		0	0	0	1	0		0	1		0	0	0	1	0		1
24	Joroeneina	Guayo	AD		0	0	0	0	0	0	0	0	0		24	1	1	0		0	1	0	0	0	0	0		0	0	0	1	0		0	0	0	1	0		0	1		0	0	0	1	0		1
25	Joroeneina	Guayo	AD		0	0	0	0	0	0	0	0	0		37	1	1	1		0	1	0	0	0	0	0		0	1	0	0	0		0	0	0	1	0		1	0		0	0	1	0	0		1
29	Jimurina	Guayo	AD		0	0	0	0	0	0	0	0	0		38	0				0	0	0	0	1	0	0		0	0	1	0	0		0	0	0	1	0		0	1		0	0	1	0	0		0
30	Jimurina	Guayo	AD		0	0	0	0	0	0	0	0	0		24	1	1	0		0	0	0	0	1	0	0		0	0	1	0	0		0	0	0	1	0		0	1		0	0	1	0	0		0
31	Jimurina	Guayo	AD		0	0	0	0	0	0	0	0	0		Absent & Unknown	0				0	1	0	0	0	0	0		0	0	0	1	0		0	0	0	1	0		1	0		0	1	0	0	0		1
35	Isla de Buari	Guayo	AD		0	0	0	0	0	0	0	0	0		60	1	0	0		0	1	0	0	0	0	0		0	1	0	0	0		0	0	0	1	0		0	1		0	0	0	0	0		1
36	Isla de Buari	Guayo	AD		0	0	0	0	0	0	0	0	0		25	0				0	1	0	0	0	0	0		0	1	0	0	0		0	0	0	1	0		0	1		0	0	0	0	0		1
37	Isla de Buari	Guayo	AD		0	0	0	0	0	0	0	0	0		33	1	1	1		0	1	0	0	0	0	0		0	1	0	0	0		0	0	0	1	0		0	1		0	0	0	0	0		1
41	Usidu	Guayo	AD		0	0	0	0	0	0	0	0	0		30	1	0	0		0	1	0	0	0	0	0		0	0	0	1	0		0	0	0	1	0		0	1		0	0	0	0	1		0
42	Usidu	Guayo	AD		0	0	0	0	0	0	0	0	0		57	1	0	0		0	1	0	0	0	0	0		0	0	0	1	0		0	0	0	1	0		0	1		0	0	0	0	1		0
43	Usidu	Guayo	AD		0	0	0	0	0	0	0	0	0		Unknown	1	1	1		0	1	0	0	0	0	0		0	0	1	0	0		0	0	0	1	0		1	0		0	0	1	0	0		1
44	Isla de Jobure	Guayo	AD		0	0	0	0	0	0	0	0	0		28	1	0	0		0	1	0	0	1	0	0		0	0	1	0	0		1	0	0	0	0		0	0		0	0	0	0	1		1
45	Isla de Jobure	Guayo	AD		0	0	0	0	0	0	0	0	0		Unknown	1	1	1		0	1	0	0	0	0	0		0	1	0	0	0		0	0	0	1	0		1	0		0	0	0	0	0		0
46	Isla de Jobure	Guayo	AD		0	0	0	0	0	0	0	0	0		44	1	1	1		0	1	0	0	0	0	0		0	0	1	0	0		0	0	0	1	0		1	0		0	0	0	0	0		1
47	Cocoina	Guayo	AD		0	0	0	0	0	0	0	0	0		30	1	1	1		0	0	0	0	1	0	0		0	0	1	0	0		0	0	0	1	0		1	0		0	0	0	0	0		1
48	Cocoina	Guayo	AD		0	0	0	0	0	0	0	0	0		23	1	0	0		0	0	0	0	1	0	0		0	1	0	0	0		0	0	0	1	0		1	0		0	0	0	0	1		0
49	Cocoina	Guayo	AD		0	0	0	0	0	0	0	0	0		65	1	1	0		0	1	0	0	0	0	0		0	1	0	0	0		0	0	0	1	0		0	1		1	0	0	0	0		1
50	Idoburojo	Guayo	AD		0	0	0	0	0	0	0	0	0		21	1	0	0		0	1	0	0	0	0	0		0	1	0	0	0		0	0	0	1	0		0	1		0	0	1	0	0		1
51	Idoburojo	Guayo	AD		0	0	0	0	0	0	0	0	0		57	1	0	0		0	1	0	0	0	0	0		0	0	0	1	0		0	0	0	1	0		1	0		0	0	1	0	0		1
52	Idoburojo	Guayo	AD		0	0	0	0	0	0	0	0	0		30	1	0	0		0	1	0	0	0	0	0		0	1	0	0	0		0	0	0	1	0		1	0		0	0	0	0	1		1
56	Caño Yeri	Guayo	AD		0	0	0	0	0	0	0	0	0		30	1	0	0		0	0	0	0	1	0	0		0	1	0	0	0		0	0	0	1	0		1	0		0	0	0	0	1		0
57	Caño Yeri	Guayo	AD		0	0	0	0	0	0	0	0	0		60	1	0	0		0	1	0	0	0	0	0		0	1	0	0	0		0	0	0	1	0		1	0		0	0	0	0	1		1
58	Caño Yeri	Guayo	AD		0	0	0	0	0	0	0	0	0		42	1	0	0		0	1	0	0	0	0	0		0	1	0	0	0		0	0	0	1	0		1	0		0	0	0	0	1		1
71	Guajakajisi	Guayo	AD		0	0	0	0	0	0	0	0	0		38	0				0	1	0	0	0	0	0		0	0	1	0	0		0	0	0	1	0		1	0		0	0	0	0	1		1
72	Guajakajisi	Guayo	AD		0	0	0	0	0	0	0	0	0		32	1	0	0		0	0	0	0	1	0	0		0	0	0	1	0		0	0	0	1	0		0	1		0	0	0	0	1		1
73	Guajakajisi	Guayo	AD		0	0	0	0	0	0	0	0	0		Absent & Unknown	0				0	0	0	0	1	0	0		0	0	0	1	0		0	0	0	1	0		0	1		0	0	0	0	1		0
74	Guajakajisi	Guayo	AD		0	0	0	0	0	0	0	0	0		48	1	0	0		0	1	0	0	0	0	0		0	0	0	1	0		0	0	0	1	0		1	0		0	0	0	0	0		1
75	Yaguara	Guayo	AD		0	0	0	0	0	0	0	0	0		39	1	1	1		0	0	0	0	1	0	0		0	0	0	1	0		0	0	0	1	0		0	1		0	0	1	0	0		0
76	Yaguara	Guayo	AD		0	0	0	0	0	0	0	0	0		20	1	0	0		0	1	0	0	0	0	0		0	1	0	0	0		0	0	0	1	0		1	0		0	0	0	0	1		0
77	Yaguara	Guayo	AD		0	0	0	0	0	0	0	0	0		18	0				0	1	0	0	0	0	0		0	1	0	0	0		0	0	0	1	0		0	1		0	0	0	0	1		0
78	Yaguara	Guayo	AD		0	0	0	0	0	0	0	0	0		41	1	0	0		0	1	0	0	0	0	0		0	1	0	0	0		0	0	0	1	0		0	1		1	0	0	0	0		1
79	Jeukubaka	Guayo	AD		0	0	0	0	0	0	0	0	0		25	1	1	1		0	1	0	0	0	0	0		0	0	0	1	0		0	0	0	1	0		1	0		0	0	0	0	1		1
80	Jeukubaka	Guayo	AD		0	0	0	0	0	0	0	0	0		Unknown	1	0	1		0	1	0	0	0	0	0		0	1	0	0	0		0	0	0	1	0		0	1		0	0	0	0	0		0
81	Jeukubaka	Guayo	AD		1	0	0	0	0	0	0	0	1		Absent & Unknown	0				0	1	0	0	0	0	0		0	1	0	0	0		0	0	0	1	0		0	1		1	0	0	0	0		0
82	Jeukubaka	Guayo	AD		0	0	0	0	0	0	0	0	0		32	1	1	1		0	1	0	0	0	0	0		0	0	1	0	0		0	0	0	1	0		1	0		0	0	1	0	0		1
83	Sarewabanoko I	Guayo	AD		0	0	0	0	0	0	0	0	0		46	1	1	0		0	1	0	0	0	0	0		0	1	0	0	0		0	0	0	1	0		0	1		0	1	0	0	0		1
84	Sarewabanoko I	Guayo	AD		0	0	0	0	0	0	0	0	0		55	1	0	0		0	1	0	0	0	0	0		0	1	0	0	0		0	0	0	1	0		0	1		0	1	0	0	0		1
85	Sarewabanoko I	Guayo	AD		0	0	0	0	0	0	0	0	0		85	1	0	1		0	1	0	0	0	0	0		0	1	0	0	0		0	0	0	1	0		0	1		0	1	0	0	0		1
86	Sarewabanoko I	Guayo	AD		0	0	0	0	0	0	0	0	0		31	1	0	1		0	1	0	0	0	0	0		0	1	0	0	0		0	0	0	1	0		0	1		0	1	0	0	0		1
87	Sarewabanoko II	Guayo	AD		0	0	0	0	0	0	0	0	0		60	1	0	0		0	1	0	0	0	0	0		0	0	0	1	0		0	0	0	1	0		1	0		0	1	0	0	0		1
88	Sarewabanoko II	Guayo	AD		0	0	0	0	0	0	0	0	0		Unknown	1	0	0		0	1	0	0	0	0	0		0	0	0	1	0		0	0	0	1	0		1	0		0	0	0	0	0		1
89	Sarewabanoko II	Guayo	AD		0	0	0	0	0	0	0	0	0		Unknown	1	0	0		0	1	0	0	0	0	0		0	0	0	1	0		0	0	0	1	0		1	0		0	0	0	0	0		0
90	Sarewabanoko II	Guayo	AD		0	0	0	0	0	0	0	0	0		43	1	0	0		0	1	0	0	0	0	0		0	0	0	1	0		0	0	0	1	0		1	0		0	1	0	0	0		1
91	Jotabuidanoko	Guayo	AD		0	0	0	0	0	0	0	0	0		Absent & Unknown	0				0	0	0	0	1	0	0		0	0	1	0	0		0	0	1	0	0		0	1		0	1	0	0	0		1
92	Jotabuidanoko	Guayo	AD		0	0	0	0	0	0	0	0	0		Unknown	1	1	1		0	0	0	0	1	0	0		0	0	1	0	0		0	0	0	1	0		1	0		0	0	1	0	0		1
93	Jotabuidanoko	Guayo	AD		0	0	0	0	0	0	0	0	0		Unknown	1	1	0		0	1	0	0	0	0	0		1	0	0	0	0		0	0	1	0	0		0	1		0	1	0	0	0		1
94	Jotabuidanoko	Guayo	AD		0	0	0	0	0	0	0	0	0		Unknown	1	1	0		0	1	0	0	0	0	0		1	0	0	0	0		0	0	1	0	0		1	0		0	0	0	0	0		0
95	Tobewabanoko	Guayo	AD		0	0	0	0	0	0	0	0	0		82	1	0	0		0	1	0	0	0	0	0		0	0	0	1	0		0	0	0	1	0		0	1		0	0	0	0	1		0
96	Tobewabanoko	Guayo	AD		0	0	0	0	0	0	0	0	0		77	1	0	0		0	1	0	0	0	0	0		0	0	0	1	0		0	0	0	1	0		0	1		0	0	0	0	1		0
97	Tobewabanoko	Guayo	AD		0	0	0	0	0	0	0	0	0		36	1	0	0		0	1	0	0	0	0	0		0	0	0	1	0		0	0	0	1	0		1	0		0	1	0	0	0		1
98	Tobewabanoko	Guayo	AD		0	0	0	0	0	0	0	0	0		35	1	0	0		0	1	0	0	0	0	0		0	0	0	1	0		0	0	0	1	0		1	0		0	0	1	0	0		1
104	Isla de Barril	Guayo	AD		0	0	0	0	0	0	0	0	0		39	1	0	0		0	1	0	0	0	0	0		0	1	0	0	0		0	0	0	1	0		0	1		0	0	0	0	1		1
105	Isla de Barril	Guayo	AD		0	0	0	0	0	0	0	0	0		33	1	0	0		0	1	0	0	0	0	0		0	1	0	0	0		0	0	0	1	0		0	1		0	0	0	0	1		1
106	Isla de Barril	Guayo	AD		0	0	0	0	0	0	0	0	0		39	1	0	0		0	1	0	0	0	0	0		0	1	0	0	0		0	0	0	1	0		0	1		0	0	0	0	1		1
107	Isla de Barril	Guayo	AD		0	0	0	0	0	0	0	0	0		31	1	0	0		0	1	0	0	0	0	0		0	1	0	0	0		0	0	0	1	0		0	1		0	0	0	0	1		1
108	Isla de Barril	Guayo	AD		0	0	0	0	0	0	0	0	0		37	1	0	0		0	1	0	0	0	0	0		0	0	0	1	0		0	0	0	1	0		1	0		0	0	0	0	1		1
109	Jobotoboto	Guayo	AD		0	0	0	0	0	0	0	0	0		34	1	1	1		0	0	0	0	1	0	0		0	0	1	0	0		0	0	0	1	0		1	0		0	0	0	0	0		1
110	Jobotoboto	Guayo	AD		0	0	0	0	0	0	0	0	0		30	1	1	0		0	1	0	0	0	0	0		0	0	1	0	0		0	0	0	1	0		0	1		0	0	0	0	1		0
111	Jobotoboto	Guayo	AD		0	0	0	0	0	0	0	0	0		36	1	1	0		0	1	0	0	0	0	0		0	0	1	0	0		0	0	0	1	0		0	1		0	0	0	0	1		0
112	Jobotoboto	Guayo	AD		0	0	0	0	0	0	0	0	0		Unknown	1	0	0		0	0	0	0	1	0	0		0	0	1	0	0		0	0	0	0	1		1	0		0	0	0	0	1		0
113	Jobotoboto	Guayo	AD		0	0	0	0	0	0	0	0	0		62	1	1	0		0	1	0	0	0	0	0		0	0	1	0	0		0	0	0	1	0		1	0		0	0	0	0	0		0
114	Juaneida de Guayo	Guayo	AD		0	0	0	0	0	0	0	0	0		51	1	1	1		0	1	0	0	0	0	0		0	1	0	0	0		0	0	0	1	0		0	1		0	0	0	0	1		1
115	Juaneida de Guayo	Guayo	AD		0	0	0	0	0	0	0	0	0		26	0				0	1	0	0	0	0	0		0	1	0	0	0		0	0	0	1	0		0	1		0	0	0	0	1		0
116	Juaneida de Guayo	Guayo	AD		0	0	0	0	0	0	0	0	0		20	1	1	1		0	0	0	0	1	0	0		0	0	0	1	0		0	0	0	1	0		1	0		1	0	0	0	0		1
117	Juaneida de Guayo	Guayo	AD		0	0	0	0	0	0	0	0	0		27	1	0	0		0	1	0	0	0	0	0		0	0	0	1	0		0	0	0	0	1		0	1		0	1	0	0	0		0
118	Juaneida de Guayo	Guayo	AD		0	0	0	1	0	0	0	0	1		57	1	1	1		0	1	0	0	0	0	0		0	1	0	0	0		0	0	0	1	0		0	1		1	0	0	0	0		1
119	Jaruina	Guayo	AD		0	0	0	0	0	0	0	1	1		48	1	0	0		0	0	0	0	1	0	0		0	1	0	0	0		0	0	0	1	0		1	0		0	1	0	0	0		0
120	Jaruina	Guayo	AD		0	0	0	0	0	0	0	0	0		24	0				0	1	0	0	0	0	0		0	0	0	1	0		0	0	0	1	0		0	1		0	1	0	0	0		1
121	Jaruina	Guayo	AD		0	0	0	0	0	0	0	0	0		Unknown	1	1	0		0	1	0	0	0	0	0		0	1	0	0	0		0	0	0	1	0		0	1		0	1	0	0	0		1
122	Jaruina	Guayo	AD		0	0	0	0	0	0	0	0	0		35	1	1	0		0	0	0	0	1	0	0		0	1	0	0	0		0	0	0	1	0		0	1		0	0	0	0	0		1
123	Jaruina	Guayo	AD		0	0	0	0	0	0	0	0	0		41	1	1	1		0	0	0	0	1	0	0		0	1	0	0	0		0	0	0	1	0		0	1		0	0	0	0	0		1
124	Komaro	Guayo	AD		0	0	0	0	0	0	0	0	0		23	1	0	0		0	1	0	0	0	0	0		0	1	0	0	0		0	0	0	1	0		1	0		0	1	0	0	0		0
125	Komaro	Guayo	AD		0	0	0	0	0	0	0	0	0		38	1	0	0		0	1	0	0	0	0	0		0	1	0	0	0		0	0	1	0	0		0	1		0	1	0	0	0		1
126	Komaro	Guayo	AD		0	0	0	0	0	0	0	0	0		Absent & Unknown	0				0	1	0	0	0	0	0		0	1	0	0	0		0	0	1	0	0		0	1		0	1	0	0	0		1
127	Komaro	Guayo	AD		0	0	0	0	0	0	0	0	0		38	1	1	1		0	0	0	0	1	0	0		0	1	0	0	0		0	0	1	0	0		0	1		0	1	0	0	0		1
128	Komaro	Guayo	AD		0	0	0	0	0	0	0	0	0		45	0				0	1	0	0	0	0	0		0	1	0	0	0		0	0	0	1	0		1	0		0	1	0	0	0		1
129	Barakataina I y II	Guayo	AD		0	0	0	0	0	0	0	0	0		29	1	1	1		0	1	0	0	0	0	0		0	1	0	0	0		0	0	0	1	0		0	1		0	0	1	0	0		0
130	Barakataina I y II	Guayo	AD		0	0	0	0	0	0	0	0	0		44	1	1	1		0	1	0	0	0	0	0		0	1	0	0	0		0	0	0	1	0		1	0		0	0	1	0	0		0
131	Barakataina I y II	Guayo	AD		0	0	0	1	0	0	0	0	1		34	1	1	1		0	0	0	0	1	0	0		0	1	0	0	0		0	0	0	1	0		1	0		0	1	0	0	0		1
132	Barakataina I y II	Guayo	AD		0	0	0	0	0	0	0	0	0		25	1	1	1		0	1	0	0	0	0	0		0	1	0	0	0		0	0	0	1	0		1	0		0	0	1	0	0		0
133	Barakataina I y II	Guayo	AD		0	0	0	0	0	0	0	1	1		28	1	1	1		0	1	0	0	0	0	0		0	1	0	0	0		0	0	0	1	0		1	0		0	0	1	0	0		0
139	Ajimuruina	Guayo	AD		0	0	0	0	0	0	0	0	0		26	1	0	0		0	1	0	0	0	0	0		0	0	0	1	0		0	0	0	1	0		1	0		0	1	0	0	0		1
140	Ajimuruina	Guayo	AD		0	0	0	0	0	0	0	0	0		29	1	0	0		0	1	0	0	0	0	0		0	0	0	1	0		0	0	0	1	0		1	0		0	1	0	0	0		1
141	Ajimuruina	Guayo	AD		0	0	0	0	0	0	0	0	0		28	1	0	0		0	1	0	0	0	0	0		0	0	0	1	0		0	0	0	1	0		1	0		0	1	0	0	0		1
142	Ajimuruina	Guayo	AD		0	0	0	0	0	0	0	0	0		50	1	0	0		0	1	0	0	0	0	0		0	0	0	1	0		0	0	0	1	0		1	0		0	1	0	0	0		1
143	Ajimuruina	Guayo	AD		0	0	0	0	0	0	0	0	0		30	1	0	0		0	0	0	0	1	0	0		0	0	0	1	0		0	0	0	1	0		1	0		0	1	0	0	0		1
144	Jimuruina	Guayo	AD		0	0	0	0	0	0	0	0	0		51	1	1	0		0	0	0	0	1	0	0		0	0	0	1	0		0	0	0	1	0		0	1		0	1	0	0	0		1
145	Jimuruina	Guayo	AD		0	0	0	0	0	0	0	0	0		Unknown	1	1	0		0	1	0	0	0	0	0		0	0	0	1	0		0	0	0	1	0		0	1		1	0	0	0	0		0
146	Jimuruina	Guayo	AD		0	0	0	0	0	0	0	0	0		Unknown	1	0	0		0	1	0	0	0	0	0		0	1	0	0	0		0	0	0	1	0		1	0		0	0	1	0	0		1
147	Jimuruina	Guayo	AD		0	0	0	0	0	0	0	0	0		26	1	1	0		0	1	0	0	0	0	1		0	0	1	0	0		1	0	0	0	0		0	1		0	0	1	0	0		1
148	Jimuruina	Guayo	AD		0	0	0	0	0	0	0	0	0		34	1	1	0		0	0	0	0	1	0	0		0	1	0	0	0		0	0	1	0	0		1	0		0	1	0	0	0		1
154	Batokonoko	Guayo	AD		0	0	0	0	0	0	0	0	0		30	0				0	1	0	0	1	0	0		0	1	0	0	0		0	0	0	1	0		0	1		1	0	0	0	0		1
155	Batokonoko	Guayo	AD		0	0	0	0	0	0	0	0	0		Absent & Unknown	0				0	1	0	0	1	0	0		0	1	0	0	0		0	0	0	1	0		0	1		1	0	0	0	0		1
156	Batokonoko	Guayo	AD		0	0	0	0	0	0	0	0	0		54	1	0	0		0	1	0	0	1	0	0		0	1	0	0	0		0	0	0	1	0		0	1		1	0	0	0	0		1
157	Batokonoko	Guayo	AD		0	0	0	0	0	0	0	0	0		29	1	1	0		0	1	0	0	1	0	0		0	1	0	0	0		0	0	0	1	0		0	1		1	0	0	0	0		1
158	Batokonoko	Guayo	AD		0	0	0	0	0	0	0	0	0		40	1	1	1		0	1	0	0	0	0	0		0	0	1	0	0		0	0	1	0	0		0	1		0	0	0	0	0		1
159	Batokonoko	Guayo	AD		0	0	0	0	0	0	0	0	0		20	0				0	1	0	0	0	0	0		0	0	1	0	0		0	0	1	0	0		0	1		0	0	0	0	0		1
160	Nayara	Guayo	AD		0	0	0	0	0	0	0	0	0		24	1	1	0		0	1	0	0	1	0	0		0	1	0	0	0		0	0	0	1	0		0	1		0	1	0	0	0		1
161	Nayara	Guayo	AD		0	0	0	0	0	0	0	0	0		Absent & Unknown	0				0	1	0	0	1	0	0		0	1	0	0	0		0	0	0	1	0		0	1		0	1	0	0	0		1
162	Nayara	Guayo	AD		0	0	0	0	0	0	0	0	0		53	1	0	0		0	1	0	0	1	0	0		0	0	0	1	0		0	0	0	1	0		1	0		0	0	0	0	1		0
163	Nayara	Guayo	AD		0	0	0	0	0	0	0	0	0		38	1	0	0		0	1	0	0	1	0	0		0	1	0	0	0		0	0	0	1	0		1	0		0	0	0	0	1		0
164	Nayara	Guayo	AD		0	0	0	0	0	0	0	0	0		45	1	0	0		0	1	0	0	1	0	0		0	1	0	0	0		0	0	0	1	0		0	1		0	0	0	0	1		1
165	Nayara	Guayo	AD		0	0	0	0	0	0	0	0	0		28	1	0	0		0	1	0	0	0	0	0		0	1	0	0	0		0	0	0	1	0		0	1		0	0	0	0	1		1
166	Santa Rosa de Guayo	Guayo	AD		0	0	0	0	0	0	0	0	0		42	1	1	1		0	0	0	0	1	0	0		1	0	0	0	0		0	0	1	0	0		1	0		0	0	0	0	1		0
167	Santa Rosa de Guayo	Guayo	AD		0	0	0	0	0	0	0	0	0		Absent & Unknown	0				0	1	0	0	0	0	0		0	0	1	0	0		0	0	1	0	0		0	1		0	1	0	0	0		0
168	Santa Rosa de Guayo	Guayo	AD		0	0	0	0	0	0	0	1	1		Unknown	1	0	1		0	1	0	0	1	0	0		0	0	1	0	0		0	1	0	0	0		1	0		0	0	1	0	0		1
169	Santa Rosa de Guayo	Guayo	AD		0	0	0	0	0	0	0	1	1		44	1	0	1		0	0	0	0	1	0	0		1	0	0	0	0		0	1	0	0	0		1	0		0	0	1	0	0		0
170	Santa Rosa de Guayo	Guayo	AD		0	0	0	0	0	0	0	0	0		21	1	0	1		0	1	0	0	0	0	0		1	0	0	0	0		0	1	0	0	0		1	0		0	0	0	0	1		1
171	Santa Rosa de Guayo	Guayo	AD		0	0	0	0	0	0	0	0	0		31	1	0	0		0	0	0	0	1	0	0		0	1	0	0	0		0	1	0	0	0		1	0
178	Jokabanoko I y II	Guayo	AD		0	0	0	0	0	0	0	0	0		31	1	1	1		0	1	0	0	0	0	1		0	0	1	0	0		0	0	0	1	0		1	0		0	0	0	1	0		1
179	Jokabanoko I y II	Guayo	AD		0	0	0	0	0	0	0	0	0		43	1	0	0		0	1	0	0	0	0	0		0	1	0	0	0		0	0	0	1	0		1	0		0	0	0	1	0		1
180	Jokabanoko I y II	Guayo	AD		0	0	0	0	0	0	0	0	0		42	1	1	0		0	1	0	0	0	0	0		0	0	1	0	0		0	0	0	1	0		1	0		0	1	0	0	0		1
181	Jokabanoko I y II	Guayo	AD		0	0	1	0	0	0	0	0	1		50	1	1	1		0	1	0	0	0	0	0		1	0	0	0	0		0	0	0	1	0		0	1		0	0	0	0	0		1
182	Jokabanoko I y II	Guayo	AD		0	0	0	0	0	0	0	0	0		38	1	1	1		0	1	0	0	0	0	0		1	0	0	0	0		0	0	0	1	0		1	0		0	0	0	0	1		1
183	Jokabanoko I y II	Guayo	AD		0	0	0	0	0	0	0	0	0		53	1	1	0		0	1	0	0	0	0	0		1	0	0	0	0		0	0	0	1	0		1	0		0	1	0	0	0		0
184	Moninoko	Guayo	AD		0	0	0	0	0	0	0	0	0		36	1	0	0		0	1	0	0	0	0	0		0	0	0	1	0		0	0	0	1	0		1	0		0	1	0	0	0		1
185	Moninoko	Guayo	AD		0	0	0	0	0	0	0	0	0		35	1	0	0		0	1	0	0	0	0	0		0	0	1	0	0		0	0	0	1	0		1	0		0	0	0	0	1		0
186	Moninoko	Guayo	AD		0	0	0	0	0	0	0	0	0		Absent & Unknown	0				0	1	0	0	0	0	0		0	0	0	1	0		0	0	0	1	0		0	1		0	1	0	0	0		1
187	Moninoko	Guayo	AD		0	0	0	0	0	0	0	0	0		38	1	0	0		0	1	0	0	0	0	0		0	0	0	1	0		0	0	0	1	0		0	1		0	1	0	0	0		1
188	Moninoko	Guayo	AD		0	0	0	0	0	0	0	0	0		34	1	0	0		0	1	0	0	0	0	0		0	1	0	0	0		0	0	0	1	0		1	0		0	0	0	0	1		0
189	Moninoko	Guayo	AD		0	0	0	0	0	0	0	0	0		22	1	1	1		0	1	0	0	0	0	0		0	0	0	1	0		0	0	0	1	0		0	1		0	0	1	0	0		1
190	Tekoburojo	Guayo	AD		0	0	0	0	0	0	0	0	0		30	1	1	0		0	1	0	0	0	0	0		0	0	0	1	0		0	0	0	1	0		1	0		0	0	0	0	1		0
191	Tekoburojo	Guayo	AD		0	0	0	0	0	0	0	0	0		28	1	1	1		0	1	0	0	0	0	0		0	0	0	1	0		0	0	0	1	0		1	0		0	0	0	0	0		0
192	Tekoburojo	Guayo	AD		0	0	0	0	0	0	0	0	0		Unknown	1	0	0		0	0	1	0	0	0	0		0	0	0	1	0		0	0	0	1	0		1	0		0	0	0	0	1		0
193	Tekoburojo	Guayo	AD		0	0	0	0	0	0	0	0	0		Unknown	1	0	0		0	1	0	0	0	0	0		1	0	0	0	0		0	0	1	0	0		0	1		0	0	0	0	1		0
194	Tekoburojo	Guayo	AD		0	0	0	0	0	0	0	0	0		55	1	1	0		0	1	0	0	0	0	0		0	0	1	0	0		0	0	1	0	0		0	1		0	0	0	0	1		0
195	Tekoburojo	Guayo	AD		0	0	0	0	0	0	0	0	0		50	1	1	0		0	1	0	0	0	0	0		0	0	0	1	0		0	0	0	1	0		0	1		0	0	0	0	1		0
196	Tekoburojo	Guayo	AD		0	0	0	0	0	0	0	0	0		40	1	0	0		0	1	0	0	0	0	0		1	0	0	0	0		0	0	1	0	0		0	1		0	0	0	0	1		0
204	Barakataina I y II	Guayo	AD		0	0	0	0	0	0	0	0	0		Unknown	1	1	0		0	1	0	0	0	0	0		0	1	0	0	0		0	0	1	0	0		1	0		0	0	1	0	0		0
205	Barakataina I y II	Guayo	AD		0	0	0	0	0	0	0	0	0		40	1	1	1		0	1	0	0	0	0	0		0	1	0	0	0		0	0	1	0	0		1	0		1	0	0	0	0		0
206	Barakataina I y II	Guayo	AD		0	0	0	0	0	0	0	1	1		61	1	1	0		0	1	0	0	0	0	0		0	1	0	0	0		0	0	0	1	0		1	0		0	1	0	0	0		1
207	Barakataina I y II	Guayo	AD		0	0	0	0	0	0	0	1	1		34	1	1	1		0	1	0	0	0	0	1		1	0	0	0	0		0	0	1	0	0		1	0		0	0	0	0	0		1
208	Barakataina I y II	Guayo	AD		0	0	0	0	0	0	0	0	0		40	1	1	1		0	1	0	0	0	0	0		0	0	0	1	0		0	0	0	1	0		1	0		0	1	0	0	0		0
209	Barakataina I y II	Guayo	AD		0	0	0	0	0	0	0	1	1		39	1	0	0		0	1	0	0	0	0	0		1	0	0	0	0		0	0	1	0	0		1	0		0	0	0	0	0		0
210	Barakataina I y II	Guayo	AD		0	0	0	0	0	0	0	0	0		40	1	1	1		0	1	0	0	0	0	0		0	0	1	0	0		0	0	0	1	0		1	0		0	0	1	0	0		0
211	Jokabanoko I y II	Guayo	AD		0	0	0	0	0	0	0	0	0		47	1	1	1		0	1	0	0	0	0	0		0	0	1	0	0		0	0	0	1	0		0	1		0	1	0	0	0		1
212	Jokabanoko I y II	Guayo	AD		0	0	0	0	0	0	0	0	0		61	1	1	1		0	1	0	0	0	0	0		0	0	1	0	0		0	0	0	1	0		0	1		0	1	0	0	0		1
213	Jokabanoko I y II	Guayo	AD		0	0	0	0	0	0	0	0	0		30	1	1	1		0	1	0	0	0	0	0		0	0	1	0	0		0	0	0	1	0		0	1		0	1	0	0	0		1
214	Jokabanoko I y II	Guayo	AD		0	0	0	0	0	0	0	0	0		Absent & Unknown	0				0	1	0	0	0	0	0		0	0	1	0	0		0	0	0	1	0		0	1		0	1	0	0	0		1
215	Jokabanoko I y II	Guayo	AD		0	0	0	0	0	0	0	0	0		44	1	1	0		0	1	0	0	0	0	0		1	0	0	0	0		0	0	0	1	0		1	0		0	0	0	0	0		1
216	Jokabanoko I y II	Guayo	AD		0	0	0	0	0	0	0	0	0		43	1	1	0		0	1	0	0	0	0	0		1	0	0	0	0		0	0	0	1	0		0	1		0	0	0	0	0		1
217	Jokabanoko I y II	Guayo	AD		0	0	0	0	0	0	0	0	0		Unknown	1	0	0		0	1	0	0	0	0	0		1	0	0	0	0		0	0	0	1	0		0	1		0	0	0	0	0		1
226	Guayaboroina	Guayo	AD		0	0	0	0	0	0	0	0	0		38	1	1	1		0	1	0	0	0	0	0		0	0	0	1	0		0	0	0	1	0		1	0		0	0	1	0	0		0
227	Guayaboroina	Guayo	AD		0	0	0	0	0	0	1	0	1		23	1	1	1		0	1	0	0	0	0	0		0	0	0	1	0		0	0	0	1	0		1	0		1	0	0	0	0		0
228	Guayaboroina	Guayo	AD		0	0	0	0	0	0	0	0	0		37	1	1	1		0	0	0	0	1	0	0		0	0	0	1	0		0	0	0	1	0		1	0		0	1	0	0	0		0
229	Guayaboroina	Guayo	AD		0	0	0	0	0	0	0	0	0		37	1	1	1		0	1	0	0	0	0	0		0	0	1	0	0		0	0	0	1	0		1	0		0	1	0	0	0		0
230	Guayaboroina	Guayo	AD		0	0	0	1	0	0	0	0	1		35	1	1	1		0	1	0	0	0	0	1		0	1	0	0	0		0	0	1	0	0		1	0		0	1	0	0	0		0
231	Guayaboroina	Guayo	AD		0	0	0	0	0	0	0	0	0		27	1	1	1		0	0	0	1	0	0	0		0	0	1	0	0		0	0	0	1	0		1	0		0	1	0	0	0		0
232	Guayaboroina	Guayo	AD		0	0	0	0	0	0	0	0	0		24	1	1	1		0	0	0	0	1	0	0		0	0	1	0	0		0	0	0	1	0		0	1		0	1	0	0	0		0
233	Guayaboroina	Guayo	AD		0	0	0	0	0	0	0	0	0		Absent & Unknown	0				0	0	0	0	1	0	0		0	0	0	1	0		0	0	0	1	0		1	0		1	0	0	0	0		0
234	Campo Alegre	Guayo	AD		0	0	0	0	0	0	0	0	0		47	1	1	0		0	1	0	0	0	0	0		0	0	0	1	0		0	0	0	1	0		0	1		0	1	0	0	0		0
235	Campo Alegre	Guayo	AD		0	0	0	0	0	0	0	0	0		Unknown	1	0	0		0	1	0	0	0	0	0		0	0	0	1	0		0	0	0	1	0		1	0		0	1	0	0	0		0
236	Campo Alegre	Guayo	AD		0	0	0	0	0	0	0	0	0		26	1	0	0		0	0	0	0	1	0	0		0	1	0	0	0		0	0	0	1	0		0	1		0	0	0	0	0		0
237	Campo Alegre	Guayo	AD		0	0	0	0	0	0	0	0	0		40	1	1	0		0	0	0	0	1	0	0		0	1	0	0	0		0	0	0	1	0		0	1		0	0	0	0	0		0
238	Campo Alegre	Guayo	AD		0	0	0	0	0	0	0	0	0		Unknown	1	0	0		0	0	0	0	1	0	0		0	1	0	0	0		0	0	0	1	0		1	0		0	0	0	0	1		0
239	Campo Alegre	Guayo	AD		0	0	0	0	0	0	0	0	0		49	1	0	1		0	0	0	0	1	0	0		0	0	0	1	0		0	0	0	1	0		1	0		0	0	0	0	0		0
240	Campo Alegre	Guayo	AD		0	0	0	0	0	0	0	0	0		Absent & Unknown	0				0	0	0	0	1	0	0		0	0	0	1	0		0	0	0	1	0		1	0		0	0	1	0	0		0
241	Campo Alegre	Guayo	AD		0	0	0	0	0	0	0	0	0		32	1	0	0		0	0	0	0	1	0	0		0	0	0	1	0		0	0	0	1	0		1	0		0	0	1	0	0		0
242	Campo Alegre	Guayo	AD		0	0	0	0	0	0	0	0	0		43	1	1	1		0	1	0	0	0	0	0		0	0	0	1	0		0	0	0	1	0		1	0		0	0	0	0	0		0
252	La Mora	Guayo	AD		0	0	0	0	0	0	0	0	0		25	1	0	0		0	1	0	0	0	0	0		0	1	0	0	0		0	0	0	1	0		0	1		0	0	0	0	0		1
253	La Mora	Guayo	AD		0	0	0	0	0	0	0	0	0		81	1	0	0		0	1	0	0	0	0	0		0	0	1	0	0		1	0	0	0	0		1	0		0	1	0	0	0		1
254	La Mora	Guayo	AD		0	0	0	0	0	0	0	0	0		30	1	0	0		0	1	0	0	0	0	0		0	1	0	0	0		0	0	0	1	0		1	0		0	1	0	0	0		0
255	La Mora	Guayo	AD		0	0	0	0	0	0	0	0	0		41	1	0	0		0	1	0	0	0	0	0		0	1	0	0	0		0	0	0	1	0		1	0		0	1	0	0	0		1
256	La Mora	Guayo	AD		0	0	0	0	0	0	0	0	0		30	1	0	1		0	1	0	0	0	0	0		0	1	0	0	0		1	0	0	0	0		0	1		0	1	0	0	0		1
257	La Mora	Guayo	AD		0	0	0	0	0	0	0	0	0		23	1	1	1		0	1	0	0	0	0	0		0	1	0	0	0		0	0	0	1	0		0	1		0	1	0	0	0		1
258	La Mora	Guayo	AD		0	0	0	0	0	0	0	0	0		45	1	0	0		0	1	0	0	0	0	0		0	1	0	0	0		0	0	0	1	0		0	1		0	1	0	0	0		1
259	La Mora	Guayo	AD		0	0	0	0	0	0	0	0	0		26	1	0	1		0	1	0	0	0	0	0		0	1	0	0	0		0	0	0	1	0		0	1		0	1	0	0	0		0
260	La Mora	Guayo	AD		0	0	0	0	0	0	0	0	0		40	1	0	0		0	1	0	0	0	0	0		0	1	0	0	0		0	0	0	1	0		1	0		0	1	0	0	0		1
261	La Mora	Guayo	AD		0	0	0	0	0	0	0	0	0		30	1	1	1		0	1	0	0	0	0	0		0	0	1	0	0		1	0	0	0	0		1	0		0	1	0	0	0		1
262	Kuamujo	Guayo	AD		0	0	0	0	0	0	0	0	0		Unknown	1	0	1		0	1	0	0	0	0	0		0	1	0	0	0		0	0	0	1	0		0	1		0	1	0	0	0		0
263	Kuamujo	Guayo	AD		0	0	0	0	0	0	0	0	0		30	1	0	0		0	1	0	0	0	0	0		0	1	0	0	0		0	0	0	1	0		0	1		0	1	0	0	0		0
264	Kuamujo	Guayo	AD		0	0	0	0	0	0	0	0	0		28	1	1	1		0	1	0	0	0	0	0		0	1	0	0	0		0	0	0	1	0		1	0		0	1	0	0	0		1
265	Kuamujo	Guayo	AD		0	0	0	0	0	0	0	0	0		34	1	1	1		0	1	0	0	0	0	0		0	1	0	0	0		0	0	0	1	0		1	0		1	0	0	0	0		1
266	Kuamujo	Guayo	AD		0	0	0	0	0	0	0	0	0		20	1	0	1		0	1	0	0	0	0	0		0	0	0	1	0		0	0	0	1	0		1	0		0	1	0	0	0		0
267	Kuamujo	Guayo	AD		0	0	0	0	0	0	0	0	0		27	1	0	1		0	1	0	0	0	0	0		0	1	0	0	0		0	0	0	1	0		0	1		0	0	0	0	1		0
268	Kuamujo	Guayo	AD		0	0	0	0	0	0	0	0	0		26	1	0	1		0	1	0	0	0	0	0		0	0	0	1	0		0	0	0	1	0		0	1		0	1	0	0	0		1
269	Kuamujo	Guayo	AD		0	0	0	0	0	0	0	0	0		28	1	0	1		0	1	0	0	0	0	0		0	0	0	1	0		0	0	0	1	0		1	0		0	0	0	0	1		1
270	Kuamujo	Guayo	AD		0	0	0	0	0	0	0	0	0		44	1	1	1		0	1	0	0	0	0	0		0	1	0	0	0		0	0	0	1	0		0	1		0	1	0	0	0		1
271	Kuamujo	Guayo	AD		0	0	0	0	0	0	0	0	0		19	1	1	0		0	1	0	0	0	0	0		0	1	0	0	0		0	0	0	1	0		0	1		0	1	0	0	0		1
282	Jerisabanoko	Guayo	AD		0	0	0	0	0	0	0	1	1		57	1	1	0		0	0	0	0	1	0	0		0	0	0	1	0		0	0	0	1	0		1	0		0	1	0	0	0		1
283	Jerisabanoko	Guayo	AD		0	0	0	0	0	0	0	0	0		53	1	1	1		0	0	0	0	1	0	0		0	1	0	0	0		0	0	0	1	0		1	0		0	1	0	0	0		1
284	Jerisabanoko	Guayo	AD		0	0	0	0	0	0	0	0	0		49	1	1	1		0	1	0	0	0	0	0		0	0	1	0	0		0	0	0	1	0		1	0		0	0	0	0	0		1
285	Jerisabanoko	Guayo	AD		0	0	0	0	0	0	0	1	1		39	1	0	1		0	1	0	0	0	0	0		0	0	1	0	0		0	0	0	1	0		1	0		0	0	1	0	0		0
286	Jerisabanoko	Guayo	AD		0	0	0	0	0	0	0	0	0		60	1	1	0		0	1	0	0	0	0	0		0	1	0	0	0		0	0	0	1	0		1	0		1	0	0	0	0		0
287	Jerisabanoko	Guayo	AD		0	0	0	0	0	0	0	0	0		24	1	1	1		0	1	0	0	0	0	0		0	0	0	1	0		0	0	0	1	0		1	0		0	0	0	0	0		0
288	Jerisabanoko	Guayo	AD		0	0	0	0	0	0	0	0	0		38	1	0	0		0	1	0	0	0	0	0		0	1	0	0	0		0	0	0	1	0		1	0		0	0	0	0	1		1
289	Jerisabanoko	Guayo	AD		0	0	0	0	0	0	0	0	0		21	0				0	1	0	0	0	0	0		0	1	0	0	0		0	0	0	1	0		0	1		0	1	0	0	0		1
290	Jerisabanoko	Guayo	AD		0	0	0	0	0	0	0	0	0		25	1	1	1		0	0	0	0	1	0	0		0	1	0	0	0		0	0	0	1	0		1	0		1	0	0	0	0		0
291	Jerisabanoko	Guayo	AD		0	0	0	0	0	0	1	0	1		25	1	0	0		0	1	0	0	0	0	0		0	0	0	1	0		0	0	0	1	0		0	1		0	1	0	0	0		0
292	Jerisabanoko	Guayo	AD		1	0	0	0	0	0	0	0	1		28	1	1	0		0	1	0	0	0	0	0		0	0	1	0	0		0	0	0	1	0		0	1		0	0	0	0	1		0
304	Jobure de Guayo	Guayo	AD		0	0	0	0	0	0	0	0	0		30	1	1	0		0	0	0	0	1	0	0		0	0	1	0	0		0	0	0	1	0		0	1		0	1	0	0	0		0
305	Jobure de Guayo	Guayo	AD		0	0	0	0	0	0	0	0	0		30	0				0	0	0	0	1	0	0		0	1	0	0	0		0	0	0	1	0		0	1		0	0	0	0	0		0
306	Jobure de Guayo	Guayo	AD		0	0	0	0	0	0	0	1	1		35	1	0	1		0	1	0	0	0	0	0		0	0	1	0	0		0	0	0	1	0		1	0		0	0	0	0	0		1
307	Jobure de Guayo	Guayo	AD		0	0	0	0	0	0	0	0	0		30	1	1	0		0	0	0	0	1	0	0		0	0	1	0	0		0	0	0	1	0		0	1		0	1	0	0	0		0
308	Jobure de Guayo	Guayo	AD		0	0	0	0	0	0	0	0	0		45	1	1	1		0	1	0	0	0	0	0		0	0	1	0	0		0	0	0	1	0		0	1		0	1	0	0	0		0
309	Jobure de Guayo	Guayo	AD		0	0	0	0	0	0	0	0	0		40	1	1	0		0	1	0	0	0	0	0		0	0	1	0	0		0	0	0	1	0		0	1		0	1	0	0	0		0
310	Jobure de Guayo	Guayo	AD		0	0	0	0	0	0	0	0	0		22	0				0	1	0	0	1	0	0		0	0	1	0	0		0	0	0	1	0		0	1		0	1	0	0	0		0
311	Jobure de Guayo	Guayo	AD		0	0	0	0	0	0	0	0	0		31	0				0	0	0	0	1	0	0		0	0	1	0	0		0	0	0	1	0		1	0		0	1	0	0	0		0
312	Jobure de Guayo	Guayo	AD		0	0	0	0	0	0	0	0	0		30	1	1	1		0	0	0	0	1	0	0		0	0	0	1	0		0	0	0	1	0		0	1		0	0	0	0	1		0
313	Jobure de Guayo	Guayo	AD		0	0	0	0	0	0	0	0	0		24	1	1	1		0	0	0	0	1	0	0		0	0	0	1	0		0	0	0	1	0		1	0		0	0	0	0	1		0
314	Jobure de Guayo	Guayo	AD		0	0	0	0	0	0	0	0	0		39	1	1	1		0	0	0	0	1	0	0		0	0	0	1	0		0	0	0	1	0		0	1		0	0	0	0	1		0
315	Jobure de Guayo	Guayo	AD		0	0	0	0	0	0	1	0	1		24	1	1	1		0	0	0	0	1	0	0		0	0	0	1	0		0	0	0	1	0		1	0		0	0	1	0	0		0
316	Jobure de Guayo	Guayo	AD		0	0	0	0	0	0	0	0	0		38	1	1	0		0	0	0	0	1	0	0		0	0	1	0	0		0	0	0	1	0		0	1		0	1	0	0	0		0
317	Merejina	Guayo	AD		0	0	0	1	0	0	0	0	1		24	1	1	0		0	0	0	0	1	0	0		0	1	0	0	0		0	0	1	0	0		0	1		0	0	0	0	1		1
318	Merejina	Guayo	AD		0	0	0	0	0	0	0	0	0		36	1	1	0		0	0	0	0	1	0	0		0	1	0	0	0		0	0	1	0	0		0	1		0	0	0	0	1		1
319	Merejina	Guayo	AD		0	0	0	0	0	0	0	0	0		36	1	1	1		0	0	0	0	1	0	0		0	0	1	0	0		0	0	1	0	0		1	0		1	0	0	0	0		0
320	Merejina	Guayo	AD		0	0	0	0	0	0	0	0	0		60	1	0	0		0	1	0	0	1	0	0		0	1	0	0	0		0	0	0	1	0		0	1		0	1	0	0	0		1
321	Merejina	Guayo	AD		0	0	0	0	0	0	0	0	0		30	1	1	1		0	0	0	0	1	0	0		0	0	0	1	0		0	0	0	1	0		1	0		0	0	1	0	0		0
322	Merejina	Guayo	AD		0	0	0	0	0	0	0	0	0		32	1	1	1		0	0	0	0	1	0	0		0	0	0	1	0		0	0	0	1	0		1	0		0	0	1	0	0		0
323	Merejina	Guayo	AD		0	0	0	0	0	0	0	0	0		54	1	1	1		0	0	0	0	1	0	0		0	0	0	1	0		0	0	0	1	0		1	0		0	0	0	0	1		0
324	Merejina	Guayo	AD		0	0	0	0	0	0	0	0	0		42	1	1	0		0	1	0	0	0	0	0		0	1	0	0	0		0	0	0	1	0		1	0		0	0	0	0	1		0
325	Merejina	Guayo	AD		0	0	0	0	1	0	0	0	1		71	1	1	0		0	1	0	0	0	0	0		0	1	0	0	0		0	0	1	0	0		1	0		0	0	1	0	0		1
326	Merejina	Guayo	AD		0	0	0	0	0	0	0	0	0		41	1	1	1		0	0	0	0	1	0	0		0	0	0	1	0		0	0	0	1	0		1	0		0	0	0	0	0		0
327	Merejina	Guayo	AD		0	0	0	0	0	0	0	0	0		30	1	1	1		0	1	0	0	0	0	0		0	1	0	0	0		0	0	1	0	0		1	0		0	0	1	0	0		0
328	Merejina	Guayo	AD		0	0	0	0	0	0	0	0	0		34	1	1	1		0	0	0	0	1	0	0		0	1	0	0	0		0	0	0	1	0		0	1		0	0	1	0	0		0
329	Merejina	Guayo	AD		0	0	0	0	0	0	0	0	0		33	1	1	1		0	1	0	0	0	0	0		0	0	0	1	0		0	0	0	1	0		1	0		0	0	0	0	1		0
330	Merejina	Guayo	AD		0	0	0	0	0	0	0	0	0		Absent & Unknown	0				0	0	0	0	1	0	0		0	1	0	0	0		0	0	0	1	0		0	1		0	1	0	0	0		0
380	Murako	Guayo	AD		0	0	0	0	0	0	0	0	0		Absent & Unknown	0				0	1	0	0	0	0	0		0	0	1	0	0		0	0	1	0	0		0	1		1	0	0	0	0		1
381	Murako	Guayo	AD		0	0	0	0	0	0	0	0	0		34	1	0	1		0	1	0	0	0	0	0		0	0	1	0	0		0	0	1	0	0		0	1		0	0	0	0	1		0
382	Murako	Guayo	AD		1	0	0	0	0	0	0	0	1		20	1	1	1		0	1	0	0	0	0	0		0	0	1	0	0		0	0	1	0	0		0	1		1	0	0	0	0		1
383	Murako	Guayo	AD		0	0	0	0	0	0	0	0	0		32	1	1	1		0	1	0	0	0	0	0		0	0	1	0	0		0	0	1	0	0		0	1		0	0	1	0	0		1
384	Murako	Guayo	AD		0	0	0	0	0	0	0	0	0		51	1	0	0		0	1	0	0	0	0	0		0	0	1	0	0		0	0	1	0	0		0	1		0	0	0	0	1		0
385	Murako	Guayo	AD		0	0	0	0	0	0	0	0	0		25	1	0	1		0	1	0	0	0	0	0		0	1	0	0	0		0	0	1	0	0		0	1		0	0	1	0	0		1
386	Murako	Guayo	AD		0	0	0	0	0	0	0	0	0		34	1	1	0		0	1	0	0	0	0	0		0	1	0	0	0		0	0	1	0	0		0	1		0	0	1	0	0		1
387	Murako	Guayo	AD		0	0	0	0	0	0	0	1	1		26	1	1	1		0	1	0	0	0	0	0		0	0	1	0	0		0	0	1	0	0		0	1		0	1	0	0	0		1
388	Murako	Guayo	AD		0	0	1	0	0	0	0	0	1		42	1	1	0		0	1	0	0	0	0	0		0	1	0	0	0		0	0	1	0	0		0	1		0	1	0	0	0		0
389	Murako	Guayo	AD		0	0	0	0	0	0	0	0	0		33	1	1	1		0	1	0	0	0	0	0		0	0	1	0	0		0	0	1	0	0		0	1		0	1	0	0	0		1
390	Murako	Guayo	AD		0	0	0	0	0	0	0	0	0		30	1	0	0		0	0	0	0	1	0	0		0	1	0	0	0		1	0	0	0	0		0	1		0	1	0	0	0		1
391	Murako	Guayo	AD		0	0	0	0	0	0	0	0	0		28	1	1	1		0	1	0	0	0	0	0		0	0	1	0	0		0	0	1	0	0		0	1		0	0	0	0	1		0
392	Murako	Guayo	AD		0	0	0	0	0	0	0	0	0		35	0				0	0	0	0	1	0	0		0	0	1	0	0		0	0	1	0	0		1	0		1	0	0	0	0		0
393	Murako	Guayo	AD		0	0	0	0	0	0	0	1	1		25	0				0	1	0	0	0	0	0		0	0	1	0	0		0	0	1	0	0		0	1		0	0	1	0	0		1
394	Murako	Guayo	AD		0	0	0	0	0	0	0	0	0		26	1	1	1		0	1	0	0	0	0	0		0	0	1	0	0		0	0	1	0	0		1	0		0	1	0	0	0		0
395	Murako	Guayo	AD		0	0	0	0	0	0	0	0	0		46	1	0	1		0	1	0	0	0	0	0		0	0	1	0	0		0	0	1	0	0		0	1		0	1	0	0	0		0
396	Murako	Guayo	AD		0	0	0	0	0	0	0	0	0		24	1	1	1		0	1	0	0	0	0	0		0	0	1	0	0		0	0	1	0	0		0	1		0	0	0	0	1		0
397	Murako	Guayo	AD		0	0	0	0	0	0	0	0	0		35	1	0	1		0	1	0	0	0	0	0		0	1	0	0	0		0	0	1	0	0		1	0		0	0	0	0	1		1
398	Murako	Guayo	AD		0	0	0	0	0	0	1	0	1		56	1	1	1		0	1	0	0	0	0	0		0	1	0	0	0		0	0	1	0	0		0	1		0	0	1	0	0		1
399	Murako	Guayo	AD		0	0	0	0	0	0	0	0	0		42	1	1	0		0	1	0	0	0	0	0		0	0	0	1	0		0	0	1	0	0		1	0
421	San Francisco de Guayo	Guayo	AD		0	0	1	0	0	0	0	0	1		30	0				0	0	1	0	0	0	1		0	0	1	0	0		0	0	0	1	0		0	1		0	1	0	0	0		0
422	San Francisco de Guayo	Guayo	AD		0	0	0	0	0	0	0	0	0		27	1	0	0		0	1	0	0	0	0	0		0	0	0	1	0		0	0	0	1	0		1	0		0	0	0	0	0		0
423	San Francisco de Guayo	Guayo	AD		0	0	0	0	0	0	0	0	0		61	1	1	1		0	0	0	0	1	0	0		0	0	0	1	0		0	0	0	1	0		1	0		0	0	1	0	0		0
424	San Francisco de Guayo	Guayo	AD		0	0	0	0	0	0	0	0	0		26	0				0	0	0	0	1	0	0		0	0	0	1	0		0	0	0	1	0		0	1		0	0	0	0	0		0
425	San Francisco de Guayo	Guayo	AD		0	0	0	0	0	0	0	1	1		26	1	1	1		0	0	0	0	1	0	0		0	0	1	0	0		0	0	0	1	0		1	0		0	0	1	0	0		0
426	San Francisco de Guayo	Guayo	AD		0	0	0	0	0	0	0	0	0		29	1	1	1		0	1	0	0	0	0	0		0	1	0	0	0		0	0	0	1	0		1	0		0	1	0	0	0		0
427	San Francisco de Guayo	Guayo	AD		0	0	0	0	0	0	0	0	0		43	1	1	1		0	1	0	0	0	0	0		0	0	1	0	0		0	0	0	1	0		1	0		0	0	1	0	0		0
428	San Francisco de Guayo	Guayo	AD		0	0	0	1	0	0	0	0	1		53	1	1	0		0	1	0	0	0	0	0		0	0	1	0	0		0	0	0	1	0		0	1		0	0	1	0	0		0
429	San Francisco de Guayo	Guayo	AD		0	0	0	0	0	0	0	0	0		Absent & Unknown	0				0	1	0	0	0	0	1		0	0	1	0	0		0	0	0	1	0		0	1		0	1	0	0	0		0
430	San Francisco de Guayo	Guayo	AD		0	1	0	0	0	0	0	0	1		25	1	1	1		0	1	0	0	0	0	1		0	0	1	0	0		0	0	0	1	0		0	1		0	1	0	0	0		0
431	San Francisco de Guayo	Guayo	AD		1	0	0	0	0	0	0	0	1		45	1	1	1		0	0	1	0	0	0	0		0	0	1	0	0		0	0	0	1	0		1	0		0	0	0	0	0		0
432	San Francisco de Guayo	Guayo	AD		1	0	0	0	0	0	0	0	1		43	0				0	0	1	0	0	0	0		0	0	1	0	0		1	0	0	0	0		1	0		0	1	0	0	0		0
433	San Francisco de Guayo	Guayo	AD		0	0	0	0	0	0	1	0	1		39	1	1	1		0	1	0	0	0	0	0		0	0	1	0	0		0	0	0	1	0		1	0		0	0	1	0	0		0
434	San Francisco de Guayo	Guayo	AD		1	0	0	0	0	0	0	0	1		33	0				0	0	1	0	0	0	0		0	0	1	0	0		0	0	0	1	0		0	0		1	0	0	0	0		0
435	San Francisco de Guayo	Guayo	AD		0	0	0	0	0	0	1	0	1		23	1	1	1		0	0	1	0	0	0	0		0	0	1	0	0		0	0	0	1	0		1	0		1	0	0	0	0		0
436	San Francisco de Guayo	Guayo	AD		1	0	0	0	0	0	0	0	1		27	0				0	0	1	0	0	0	0		0	0	1	0	0		0	0	0	1	0		0	1		0	1	0	0	0		0
437	San Francisco de Guayo	Guayo	AD		0	0	0	0	0	0	0	0	0		21	1	1	1		0	1	0	0	0	0	0		0	0	1	0	0		0	0	1	0	0		0	1		0	1	0	0	0		0
438	San Francisco de Guayo	Guayo	AD		0	0	0	0	0	0	0	0	0		25	1	1	1		0	1	0	0	0	0	0		0	0	1	0	0		0	0	1	0	0		1	0		0	0	0	1	0		1
439	San Francisco de Guayo	Guayo	AD		0	0	0	0	0	0	1	0	1		49	1	1	0		0	0	1	0	0	0	1		0	0	1	0	0		0	0	0	1	0		0	1		1	0	0	0	0		0
440	San Francisco de Guayo	Guayo	AD		0	0	0	0	0	0	0	0	0		25	1	1	1		0	1	0	0	0	0	0		0	1	0	0	0		0	0	0	1	0		0	1		0	0	1	0	0		0
441	San Francisco de Guayo	Guayo	AD		0	0	0	0	0	0	0	0	0		36	1	1	0		0	1	0	0	0	0	0		0	1	0	0	0		0	0	0	1	0		0	1		0	0	1	0	0		0
442	San Francisco de Guayo	Guayo	AD		0	0	0	0	0	0	0	0	0		Absent & Unknown	0				0	1	0	0	0	0	0		0	0	1	0	0		0	0	0	1	0		0	1		0	0	0	0	0		0
443	San Francisco de Guayo	Guayo	AD		0	0	0	0	0	0	0	0	0		Absent & Unknown	0				0	1	0	0	0	0	0		0	0	1	0	0		0	0	0	1	0		0	1		0	0	0	0	0		0
444	San Francisco de Guayo	Guayo	AD		0	0	0	0	0	0	0	0	0		Absent & Unknown	0				0	1	0	0	0	0	0		0	0	1	0	0		0	0	0	1	0		0	1		0	0	0	0	0		0
445	San Francisco de Guayo	Guayo	AD		0	0	0	0	0	0	0	0	0		Absent & Unknown	0				0	1	0	0	0	0	0		0	0	1	0	0		0	0	0	1	0		0	1		0	0	0	0	0		0
446	San Francisco de Guayo	Guayo	AD		0	0	0	0	0	0	0	0	0		35	1	1	1		0	1	0	0	0	0	0		0	0	1	0	0		0	0	0	1	0		0	1		0	0	0	0	0		0
447	San Francisco de Guayo	Guayo	AD		0	0	0	0	0	0	1	0	1		25	1	1	1		0	1	0	0	0	0	0		0	0	1	0	0		0	0	0	1	0		0	1		1	0	0	0	0		0
448	San Francisco de Guayo	Guayo	AD		0	1	0	0	0	0	0	0	1		55	1	1	1		0	1	0	0	0	0	0		0	0	1	0	0		0	0	0	1	0		0	1		1	0	0	0	0		0
449	San Francisco de Guayo	Guayo	AD		1	0	0	0	0	0	0	0	1		27	1	1	1		0	0	1	0	0	0	1		0	0	1	0	0		0	0	0	1	0		0	1		0	1	0	0	0		0
450	San Francisco de Guayo	Guayo	AD		0	0	0	0	0	0	1	0	1		51	1	1	0		0	0	1	0	0	0	1		0	0	1	0	0		0	0	0	1	0		0	1		0	1	0	0	0		0
451	San Francisco de Guayo	Guayo	AD		0	0	0	0	0	0	0	0	0		37	0				0	0	1	0	0	0	1		0	0	1	0	0		0	0	0	1	0		0	1		0	1	0	0	0		0
452	San Francisco de Guayo	Guayo	AD		1	0	0	0	0	0	0	0	1		29	1	1	1		0	0	1	0	0	0	0		0	0	1	0	0		0	0	0	1	0		0	1		0	1	0	0	0		0
453	San Francisco de Guayo	Guayo	AD		1	0	0	0	0	0	0	0	1		27	1	1	1		0	0	1	0	0	0	0		0	0	1	0	0		0	0	0	1	0		0	1		0	1	0	0	0		0
454	San Francisco de Guayo	Guayo	AD		0	0	0	0	0	0	0	0	0		67	1	1	0		0	0	1	0	0	0	0		0	0	1	0	0		0	0	0	1	0		0	1		0	1	0	0	0		0
455	San Francisco de Guayo	Guayo	AD		0	0	0	0	0	0	0	0	0		Absent & Unknown	0				0	0	0	0	1	0	0		0	0	1	0	0		0	0	0	1	0		0	1		0	0	1	0	0		1
456	San Francisco de Guayo	Guayo	AD		0	0	0	0	0	0	0	0	0		65	1	0	0		0	0	0	0	1	0	0		0	0	1	0	0		0	0	0	1	0		0	1		0	0	1	0	0		1
457	San Francisco de Guayo	Guayo	AD		0	0	0	0	0	0	0	0	0		38	1	1	1		0	1	0	0	0	0	1		0	0	1	0	0		0	0	0	1	0		1	0		0	1	0	0	0		0
458	San Francisco de Guayo	Guayo	AD		0	0	0	0	0	0	0	0	0		26	1	1	1		0	0	1	0	0	0	0		0	0	1	0	0		0	0	0	1	0		1	0		0	1	0	0	0		0
459	San Francisco de Guayo	Guayo	AD		1	0	0	0	0	0	0	0	1		34	1	1	1		0	0	1	0	0	0	0		0	0	1	0	0		0	0	0	1	0		1	0		0	1	0	0	0		1
460	San Francisco de Guayo	Guayo	AD		0	0	0	0	0	0	1	0	1		56	1	0	1		0	1	0	0	0	0	1		0	0	1	0	0		0	0	0	1	0		1	0		0	1	0	0	0		0
461	San Francisco de Guayo	Guayo	AD		0	0	0	0	0	0	1	0	1		34	1	1	1		0	1	0	0	0	0	0		0	1	0	0	0		0	0	0	1	0		0	1		0	1	0	0	0		0
462	San Francisco de Guayo	Guayo	AD		0	0	0	1	0	0	0	0	1		47	1	1	1		0	1	0	0	0	0	1		0	0	1	0	0		0	0	0	1	0		0	1		0	0	1	0	0		0
463	San Francisco de Guayo	Guayo	AD		0	0	0	1	0	0	0	0	1		38	1	1	1		0	1	0	0	0	0	1		0	0	1	0	0		0	0	0	1	0		0	1		1	0	0	0	0		1
464	San Francisco de Guayo	Guayo	AD		0	0	0	1	0	0	0	0	1		32	0				0	1	0	0	0	0	1		0	0	1	0	0		0	0	0	1	0		0	1		1	0	0	0	0		0
465	San Francisco de Guayo	Guayo	AD		0	0	0	0	0	0	1	0	1		Absent & Unknown	0				0	1	0	0	0	0	0		0	1	0	0	0		0	0	0	1	0		1	0		0	1	0	0	0		1
466	San Francisco de Guayo	Guayo	AD		0	1	0	0	0	0	0	0	1		37	1	1	1		0	0	1	0	0	0	0		0	0	1	0	0		1	0	0	0	0		0	1		0	1	0	0	0		0
467	San Francisco de Guayo	Guayo	AD		0	1	0	0	0	0	0	0	1		53	1	1	1		0	1	0	0	0	0	0		0	1	0	0	0		1	0	0	0	0		0	1		0	1	0	0	0		1
468	San Francisco de Guayo	Guayo	AD		0	0	0	0	0	0	0	0	0		31	1	1	1		0	1	0	0	0	0	0		0	1	0	0	0		0	0	0	1	0		0	1		0	1	0	0	0		0
469	San Francisco de Guayo	Guayo	AD		0	0	0	0	0	0	1	0	1		25	0				0	0	1	0	0	0	0		0	1	0	0	0		0	0	0	1	0		0	1		0	1	0	0	0		0
470	San Francisco de Guayo	Guayo	AD		0	0	0	0	1	0	0	0	1		30	0				0	1	0	0	0	0	1		0	0	1	0	0		0	0	0	1	0		0	1		1	0	0	0	0		0
471	San Francisco de Guayo	Guayo	AD		0	0	0	0	1	0	0	0	1		Absent & Unknown	0				0	1	0	0	0	0	1		0	0	1	0	0		0	0	0	1	0		0	1		1	0	0	0	0		0
472	San Francisco de Guayo	Guayo	AD		0	1	0	0	0	0	0	0	1		29	1	1	1		0	1	0	0	0	0	0		0	1	0	0	0		0	0	0	1	0		1	0		0	1	0	0	0		0
473	San Francisco de Guayo	Guayo	AD		0	0	0	0	0	0	0	0	0		47	1	1	1		0	1	0	0	0	0	0		0	0	1	0	0		0	0	0	1	0		0	1		0	1	0	0	0		0
474	San Francisco de Guayo	Guayo	AD		0	0	0	0	0	0	1	0	1		46	1	1	1		0	0	1	0	0	0	0		0	0	1	0	0		0	0	0	1	0		1	0		0	0	0	1	0		0
475	San Francisco de Guayo	Guayo	AD		0	0	0	0	0	0	0	0	0		45	1	1	1		0	1	0	0	0	0	0		0	0	1	0	0		0	0	0	1	0		1	0		0	1	0	0	0		0
476	San Francisco de Guayo	Guayo	AD		0	0	0	0	0	0	0	0	0		48	1	1	1		0	1	0	0	0	0	0		0	0	1	0	0		0	0	0	1	0		0	1		0	0	1	0	0		0
477	San Francisco de Guayo	Guayo	AD		0	0	0	0	0	0	0	0	0		24	1	1	1		0	1	0	0	0	0	0		0	0	1	0	0		0	0	0	1	0		1	0		0	0	1	0	0		0
478	San Francisco de Guayo	Guayo	AD		1	0	0	0	0	0	0	0	1		47	1	1	1		0	1	0	0	0	0	0		0	0	1	0	0		0	0	0	1	0		1	0		0	1	0	0	0		0
479	San Francisco de Guayo	Guayo	AD		0	0	0	0	0	0	1	0	1		45	1	1	1		0	1	0	0	0	0	0		0	0	1	0	0		0	0	0	1	0		1	0		1	0	0	0	0		0
480	San Francisco de Guayo	Guayo	AD		0	1	0	0	0	0	0	0	1		55	1	1	1		0	1	0	0	0	0	0		0	0	1	0	0		0	0	0	1	0		1	0		0	1	0	0	0		0
481	San Francisco de Guayo	Guayo	AD		0	0	0	0	0	0	0	0	0		54	1	1	1		0	0	0	0	1	0	0		0	0	1	0	0		0	0	0	1	0		1	0		0	0	0	0	1		0
482	San Francisco de Guayo	Guayo	AD		0	0	0	0	0	0	0	1	1		Absent & Unknown	0				0	1	0	0	0	0	0		0	0	1	0	0		0	0	0	1	0		1	0		0	1	0	0	0		0
483	San Francisco de Guayo	Guayo	AD		0	0	0	0	0	0	0	0	0		Absent & Unknown	0				0	1	0	0	0	0	0		0	1	0	0	0		0	0	0	1	0		0	1		0	1	0	0	0		0
484	San Francisco de Guayo	Guayo	AD		0	0	0	0	0	0	0	0	0		37	0				0	0	0	0	1	0	0		0	0	1	0	0		0	0	0	1	0		0	1		0	0	0	0	0		1
485	San Francisco de Guayo	Guayo	AD		0	0	0	0	0	0	0	0	0		32	1	1	1		0	1	0	0	0	0	0		0	0	1	0	0		1	0	0	0	0		0	1		0	0	1	0	0		0
486	San Francisco de Guayo	Guayo	AD		0	0	0	0	0	0	0	0	0		Absent & Unknown	0				0	1	0	0	0	0	0		0	1	0	0	0		0	0	0	1	0		1	0		0	0	0	0	0		0
487	San Francisco de Guayo	Guayo	AD		0	0	0	0	0	0	0	0	0		Absent & Unknown	0				0	1	0	0	0	0	1		0	0	1	0	0		0	0	0	1	0		1	0		0	1	0	0	0		0
488	San Francisco de Guayo	Guayo	AD		1	0	0	0	0	0	0	0	1		43	1	1	0		0	1	0	0	0	0	0		0	0	1	0	0		0	0	0	1	0		1	0		0	1	0	0	0		0
489	San Francisco de Guayo	Guayo	AD		1	0	0	0	0	0	0	0	1		Absent & Unknown	0				0	1	0	0	0	0	0		0	0	1	0	0		0	0	1	0	0		1	0		0	1	0	0	0		0
490	San Francisco de Guayo	Guayo	AD		0	0	0	0	0	0	0	0	0		46	1	1	0		0	1	0	0	0	0	0		0	1	0	0	0		0	0	0	1	0		1	0		0	1	0	0	0		0
491	San Francisco de Guayo	Guayo	AD		1	0	0	0	0	0	0	0	1		26	1	1	1		0	1	0	0	0	0	0		0	0	1	0	0		1	0	0	0	0		1	0		0	1	0	0	0		0
492	San Francisco de Guayo	Guayo	AD		0	0	0	0	0	0	0	0	0		36	1	0	0		0	0	0	0	1	0	0		0	0	0	1	0		0	0	0	1	0		1	0		0	0	0	0	1		0
493	San Francisco de Guayo	Guayo	AD		0	0	0	0	0	0	0	0	0		35	1	1	0		0	1	0	0	0	0	0		0	0	1	0	0		0	0	0	1	0		1	0		0	0	0	0	1		0
494	San Francisco de Guayo	Guayo	AD		0	0	0	0	0	0	0	0	0		38	1	1	0		0	1	0	0	0	0	0		0	0	0	1	0		0	0	0	1	0		0	1		0	0	0	0	1		0
495	San Francisco de Guayo	Guayo	AD		0	0	0	0	0	0	1	0	1		25	1	1	1		0	0	1	0	0	0	0		0	0	1	0	0		0	0	0	1	0		1	0		0	1	0	0	0		0
496	San Francisco de Guayo	Guayo	AD		0	0	0	0	0	0	0	0	0		21	1	1	1		0	0	0	0	1	0	0		0	0	0	1	0		0	0	0	1	0		0	1		0	0	0	0	0		0
497	San Francisco de Guayo	Guayo	AD		0	0	0	0	0	0	0	0	0		34	1	1	0		0	1	0	0	0	0	0		0	1	0	0	0		0	0	1	0	0		0	1		0	1	0	0	0		1
498	San Francisco de Guayo	Guayo	AD		0	0	0	0	0	0	1	0	1		43	1	1	1		0	1	0	0	0	0	0		0	1	0	0	0		0	0	0	1	0		0	1		0	0	0	1	0		0
499	San Francisco de Guayo	Guayo	AD		1	0	0	0	0	0	0	0	1		65	1	0	0		0	1	0	0	0	0	0		0	0	1	0	0		0	0	0	1	0		1	0		0	0	0	0	0		0
3	Abuenekabanoco	Curiapo	AD		0	0	0	0	0	0	0	0	0		37	1	0	0		0	1	0	0	0	0	0		0	1	0	0	0		0	0	0	1	0		1	0
5	Ildamananoco	Curiapo	AD		0	0	0	0	0	0	0	0	0		37	1	1	1		0	1	0	0	0	0	0		0	0	0	1	0		0	0	0	1	0		0	1		0	1	0	0	0		1
10	Bocoboco	Curiapo	AD		0	0	0	0	0	0	0	0	0		55	1	0	0		0	0	0	0	1	0	0		0	0	0	1	0		0	0	0	1	0		1	0		0	0	0	0	0		0
26	Jotajana II	Curiapo	AD		0	0	0	0	0	0	0	0	0		15	1	0	0		0	0	0	0	1	0	0		0	0	0	1	0		0	0	0	1	0		1	0		0	0	0	0	1		1
27	Jotajana II	Curiapo	AD		0	0	0	0	0	0	0	0	0		51	1	0	0		0	1	0	0	0	0	0		0	0	0	1	0		0	0	0	1	0		1	0		0	0	0	0	1		1
28	Jotajana II	Curiapo	AD		0	0	0	0	0	0	0	0	0		26	1	0	0		0	1	0	0	0	0	0		0	0	0	1	0		0	0	0	1	0		1	0		0	0	0	0	1		1
32	Boca de Nabakojoida	Curiapo	AD		0	0	0	0	0	0	0	0	0		75	1	1	0		0	1	0	0	0	0	0		0	0	0	1	0		0	0	0	1	0		1	0		0	0	0	0	1		0
33	Boca de Nabakojoida	Curiapo	AD		0	0	0	0	0	0	0	0	0		56	1	1	0		0	1	0	0	0	0	0		0	0	0	1	0		0	0	0	1	0		1	0		0	0	0	0	1		0
34	Boca de Nabakojoida	Curiapo	AD		0	0	0	0	0	0	0	0	0		27	1	0	0		0	1	0	0	0	0	0		0	0	0	1	0		0	0	0	1	0		1	0		0	0	0	0	1		0
38	Nabakojoida	Curiapo	AD		0	0	0	0	0	0	0	0	0		27	1	0	0		0	1	0	0	0	0	0		0	0	0	1	0		0	0	0	1	0		1	0		0	0	0	0	1		0
39	Nabakojoida	Curiapo	AD		0	0	0	0	0	0	0	0	0		55	1	1	0		0	1	0	0	0	0	0		0	0	0	1	0		0	0	0	1	0		1	0		0	0	0	0	1		0
40	Nabakojoida	Curiapo	AD		0	0	0	0	0	0	0	0	0		Absent & Unknown	0				0	1	0	0	0	0	0		0	0	0	1	0		0	0	0	1	0		1	0		1	0	0	0	0		0
53	Guayaboroina de Curiapo	Curiapo	AD		0	0	0	0	0	0	0	0	0		Absent & Unknown	0				0	0	0	0	1	0	0		0	0	0	1	0		0	0	0	1	0		1	0		0	0	0	0	1		0
54	Guayaboroina de Curiapo	Curiapo	AD		0	0	0	0	0	0	0	0	0		Unknown	1	0	0		0	0	0	0	1	0	0		0	0	0	1	0		0	0	0	1	0		1	0		0	0	0	0	1		0
55	Guayaboroina de Curiapo	Curiapo	AD		0	0	0	0	0	0	0	0	0		Unknown	1	0	0		0	0	0	0	1	0	0		0	0	0	1	0		0	0	0	1	0		1	0		0	0	0	0	1		0
63	Nabakojoida	Curiapo	AD		0	0	0	0	0	0	0	0	0		45	1	0	0		0	1	0	0	0	0	0		0	0	0	1	0		0	0	0	1	0		1	0		0	0	1	0	0		0
64	Nabakojoida	Curiapo	AD		0	0	0	0	0	0	0	0	0		Unknown	1	1	0		0	1	0	0	0	0	0		0	0	0	1	0		0	0	0	1	0		1	0		0	0	0	0	0		1
65	Nabakojoida	Curiapo	AD		0	0	0	0	0	0	0	0	0		30	1	0	0		0	0	1	0	0	0	0		0	0	0	1	0		0	0	0	1	0		1	0		0	0	1	0	0		0
66	Nabakojoida	Curiapo	AD		0	0	0	0	0	0	0	0	0		43	1	0	0		0	1	0	0	0	0	0		0	0	0	1	0		0	0	0	1	0		1	0		0	0	1	0	0		1
99	Jotajana I	Curiapo	AD		0	0	0	0	0	0	0	0	0		31	1	0	0		0	0	0	0	1	0	0		0	1	0	0	0		0	0	0	1	0		0	1		0	0	0	0	1		0
100	Jotajana I	Curiapo	AD		0	0	0	0	0	0	0	0	0		40	1	0	0		0	0	0	0	1	0	0		0	0	0	1	0		0	0	0	1	0		0	1		0	0	0	0	1		0
101	Jotajana I	Curiapo	AD		0	0	0	0	0	0	0	0	0		24	1	1	0		0	0	0	0	1	0	0		0	0	0	1	0		0	0	0	1	0		0	1		0	0	0	0	1		0
102	Jotajana I	Curiapo	AD		0	0	0	0	0	0	0	0	0		33	1	0	0		0	0	0	0	1	0	0		0	0	0	1	0		0	0	0	1	0		0	1		0	0	0	0	1		1
103	Jotajana I	Curiapo	AD		0	0	0	0	0	0	0	0	0		32	1	0	0		0	0	0	0	1	0	0		0	0	0	1	0		0	0	0	1	0		1	0		0	0	0	0	1		0
134	Moraina de Curiapo	Curiapo	AD		0	0	0	0	0	0	0	0	0		Unknown	1	1	1		0	1	0	0	0	0	0		0	0	0	1	0		0	0	0	1	0		1	0		0	1	0	0	0		1
135	Moraina de Curiapo	Curiapo	AD		0	0	0	0	0	0	0	0	0		Absent & Unknown	0				0	1	0	0	0	0	0		0	1	0	0	0		0	0	0	1	0		1	0		0	1	0	0	0		1
136	Moraina de Curiapo	Curiapo	AD		0	0	0	0	0	0	0	0	0		37	1	1	0		0	0	0	0	1	0	0		0	0	0	1	0		0	0	0	1	0		1	0		0	0	0	0	0		0
137	Moraina de Curiapo	Curiapo	AD		0	0	0	0	0	0	0	0	0		40	1	1	0		0	1	0	0	0	0	0		0	1	0	0	0		0	0	0	1	0		1	0		0	0	1	0	0		1
138	Moraina de Curiapo	Curiapo	AD		0	0	0	0	0	0	0	0	0		Unknown	1	0	0		0	1	0	0	0	0	0		0	0	0	1	0		0	0	0	1	0		1	0		0	0	1	0	0		1
172	Moraina	Curiapo	AD		0	0	0	0	0	0	0	0	0		Absent & Unknown	0				0	1	0	0	0	0	0		0	0	0	1	0		0	0	0	1	0		1	0		0	0	0	0	1		0
173	Moraina	Curiapo	AD		0	0	0	0	0	0	0	0	0		34	1	1	1		0	1	0	0	0	0	0		0	0	0	1	0		0	0	0	1	0		1	0		0	0	0	0	1		0
174	Moraina	Curiapo	AD		0	0	0	0	0	0	0	0	0		34	1	1	0		0	1	0	0	0	0	0		0	0	0	1	0		0	0	0	1	0		0	1		0	0	0	0	1		0
175	Moraina	Curiapo	AD		0	0	0	0	0	0	0	0	0		35	1	0	0		0	0	1	0	0	0	0		0	0	0	1	0		0	0	0	1	0		1	0		0	1	0	0	0		0
176	Moraina	Curiapo	AD		0	0	0	0	0	0	0	0	0		50	1	1	0		0	0	0	0	1	0	0		0	0	0	1	0		0	0	0	1	0		0	1		0	0	0	0	1		0
177	Moraina	Curiapo	AD		0	0	0	0	0	0	0	0	0		33	1	0	0		0	0	1	0	0	0	0		0	0	0	1	0		0	0	0	1	0		1	0		0	0	0	0	0		1
218	Osibukabinoko	Curiapo	AD		0	0	0	0	0	0	0	0	0		33	1	1	1		0	1	0	0	0	0	0		0	0	1	0	0		0	0	0	1	0		1	0		0	0	0	0	0		0
219	Osibukabinoko	Curiapo	AD		0	0	0	0	0	0	0	0	0		37	1	1	1		0	1	0	0	0	0	0		0	0	0	1	0		0	0	0	1	0		1	0		0	0	0	0	1		0
220	Osibukabinoko	Curiapo	AD		0	0	0	0	0	0	0	0	0		29	1	1	1		0	1	0	0	0	0	0		0	0	1	0	0		0	0	0	1	0		1	0		0	0	0	0	1		0
221	Osibukabinoko	Curiapo	AD		0	0	0	0	0	0	0	0	0		69	0				0	1	0	0	0	0	0		0	1	0	0	0		0	0	0	1	0		1	0		0	0	0	0	1		0
222	Osibukabinoko	Curiapo	AD		0	0	0	0	0	0	0	0	0		73	1	0	0		0	1	0	0	0	0	0		0	1	0	0	0		0	0	0	1	0		1	0		0	0	0	0	1		0
223	Osibukabinoko	Curiapo	AD		0	0	0	0	0	0	0	0	0		65	0				0	1	0	0	0	0	0		0	0	0	1	0		0	0	0	1	0		1	0		0	0	0	0	1		0
224	Osibukabinoko	Curiapo	AD		0	0	0	0	0	0	0	0	0		35	1	0	0		0	0	1	0	0	0	0		0	1	0	0	0		0	0	0	1	0		1	0		0	0	0	0	1		0
225	Osibukabinoko	Curiapo	AD		0	0	0	0	0	0	0	0	0		35	1	1	0		0	0	1	0	0	0	0		0	0	0	1	0		0	0	0	1	0		1	0		0	1	0	0	0		1
293	Ajotejana	Curiapo	AD		0	0	0	0	0	0	0	0	0		40	1	0	1		0	1	0	0	0	0	0		0	0	0	1	0		0	0	0	1	0		1	0		0	1	0	0	0		0
294	Ajotejana	Curiapo	AD		0	0	0	0	0	0	0	0	0		32	1	0	0		0	0	0	0	1	0	0		0	0	0	1	0		0	0	0	1	0		1	0		0	1	0	0	0		1
295	Ajotejana	Curiapo	AD		0	0	0	0	0	0	0	0	0		52	1	0	0		0	0	0	0	1	0	0		0	0	0	1	0		0	0	0	1	0		1	0		0	1	0	0	0		1
296	Ajotejana	Curiapo	AD		0	0	0	0	0	0	0	0	0		60	1	0	0		0	1	0	0	0	0	0		0	0	0	1	0		0	0	0	1	0		0	1		0	1	0	0	0		1
297	Ajotejana	Curiapo	AD		0	0	0	0	0	0	0	1	1		43	1	0	0		0	1	0	0	0	0	0		0	0	0	1	0		0	0	0	1	0		1	0		0	0	0	0	1		0
298	Ajotejana	Curiapo	AD		0	0	0	0	0	0	0	0	0		25	1	1	1		0	1	0	0	0	0	0		0	0	0	1	0		0	0	0	1	0		0	1		0	0	1	0	0		0
299	Ajotejana	Curiapo	AD		0	0	0	0	0	0	0	0	0		21	1	0	1		0	1	0	0	0	0	0		0	0	0	1	0		0	0	0	1	0		0	1		0	0	0	0	0		0
300	Ajotejana	Curiapo	AD		0	0	0	0	0	0	0	0	0		41	1	1	1		0	0	0	0	1	0	0		0	0	0	1	0		0	0	0	1	0		1	0		0	0	0	0	0		0
301	Ajotejana	Curiapo	AD		0	0	0	0	0	0	0	0	0		26	1	1	0		0	0	0	0	1	0	0		0	0	1	0	0		0	0	0	1	0		1	0		0	0	0	0	1		1
302	Ajotejana	Curiapo	AD		0	0	0	0	0	0	0	0	0		38	1	1	0		0	1	0	0	0	0	0		0	0	1	0	0		0	0	0	1	0		1	0		0	0	0	0	0		1
303	Ajotejana	Curiapo	AD		0	0	0	0	0	0	0	0	0		51	1	1	0		0	1	0	0	0	0	0		0	0	0	1	0		0	0	0	1	0		0	1		0	0	0	0	0		0
362	Curiapo	Curiapo	AD		0	0	0	0	0	0	0	0	0		40	1	1	0		0	1	0	0	0	0	0		0	1	0	0	0		0	0	1	0	0		1	0
363	Curiapo	Curiapo	AD		0	0	0	0	0	0	1	0	1		34	1	1	0		0	1	0	0	0	0	0		0	0	1	0	0		0	0	1	0	0		0	1
364	Curiapo	Curiapo	AD		0	0	0	0	0	0	0	0	0		38	1	1	0		0	1	0	0	0	0	0		0	0	1	0	0		0	0	1	0	0		0	1
365	Curiapo	Curiapo	AD		0	0	0	0	0	0	0	0	0		Absent & Unknown	0				0	1	0	0	0	0	0		0	1	0	0	0		0	0	1	0	0		1	0
366	Curiapo	Curiapo	AD		0	0	0	0	0	0	1	0	1		42	1	1	0		0	1	0	0	0	0	0		0	1	0	0	0		0	0	1	0	0		1	0
367	Curiapo	Curiapo	AD		0	0	0	0	0	0	0	0	0		25	1	0	0		0	1	0	0	0	0	0		0	0	1	0	0		0	0	1	0	0		0	0
368	Curiapo	Curiapo	AD		0	0	0	0	0	0	0	0	0		34	1	1	0		1	0	0	0	0	0	1		0	0	1	0	0		0	0	1	0	0		1	0
369	Curiapo	Curiapo	AD		0	0	0	0	0	0	0	0	0		35	1	1	0		0	1	0	0	0	0	0		0	0	1	0	0		0	0	1	0	0		1	0
370	Curiapo	Curiapo	AD		0	0	0	0	0	0	0	0	0		36	1	1	0		1	0	0	0	0	0	0		0	0	0	1	0		0	0	1	0	0		0	1
371	Curiapo	Curiapo	AD		0	0	0	0	0	0	1	0	1		29	1	1	0		1	0	0	0	0	0	0		0	0	1	0	0		0	0	1	0	0		1	0
372	Curiapo	Curiapo	AD		0	0	0	0	1	0	0	0	1		48	1	1	0		1	0	0	0	0	0	0		0	0	1	0	0		0	0	1	0	0		1	0
373	Curiapo	Curiapo	AD		0	0	0	0	0	0	0	0	0		38	1	1	0		0	1	0	0	0	0	0		0	1	0	0	0		0	0	1	0	0		0	1
374	Curiapo	Curiapo	AD		0	0	0	0	0	0	1	0	1		40	1	1	0		1	0	0	0	0	0	1		0	0	1	0	0		0	0	1	0	0		1	0
375	Curiapo	Curiapo	AD		0	0	0	0	0	0	0	0	0		42	1	1	0		1	0	0	0	0	0	1		0	0	1	0	0		0	0	1	0	0		0	1
376	Curiapo	Curiapo	AD		0	0	0	0	0	0	0	0	0		23	1	1	0		0	1	0	0	0	0	0		0	1	0	0	0		0	0	1	0	0		1	0
377	Curiapo	Curiapo	AD		0	0	0	0	0	0	0	0	0		42	1	1	0		0	1	0	0	0	0	0		0	1	0	0	0		0	0	1	0	0		1	0
378	Curiapo	Curiapo	AD		0	0	0	0	0	0	0	0	0		39	1	0	0		0	1	0	0	0	0	0		0	1	0	0	0		0	0	1	0	0		1	0
379	Curiapo	Curiapo	AD		0	0	0	0	0	0	0	0	0		45	1	0	0		0	1	0	0	0	0	0		0	1	0	0	0		0	0	1	0	0		1	0
400	Kaiwire	Curiapo	AD		0	0	0	0	0	0	0	0	0		34	1	1	0		0	1	0	0	0	0	0		0	0	0	1	0		0	0	0	1	0		0	1		0	0	0	0	1		1
401	Kaiwire	Curiapo	AD		0	0	0	0	0	0	0	0	0		32	1	0	0		0	1	0	0	0	0	0		0	0	0	1	0		0	0	0	1	0		1	0		0	0	0	0	1		1
402	Kaiwire	Curiapo	AD		0	0	0	0	0	0	0	0	0		45	1	1	1		0	0	0	0	1	0	0		0	0	0	1	0		0	0	0	1	0		1	0		0	0	0	0	1		0
403	Kaiwire	Curiapo	AD		0	0	0	0	0	0	0	0	0		52	1	1	0		0	1	0	0	0	0	0		0	0	0	1	0		0	0	0	1	0		1	0		0	0	0	0	1		0
404	Kaiwire	Curiapo	AD		0	0	0	0	0	0	0	0	0		21	1	0	0		0	1	0	0	0	0	0		0	0	0	1	0		0	0	0	1	0		0	1		0	0	0	0	1		0
405	Kaiwire	Curiapo	AD		0	0	0	0	0	0	0	0	0		39	1	0	0		0	1	0	0	0	0	0		0	0	0	1	0		0	0	0	1	0		1	0		0	0	0	0	1		0
406	Kaiwire	Curiapo	AD		0	0	0	0	0	0	0	0	0		40	1	1	1		0	1	0	0	0	0	0		0	0	0	1	0		0	0	0	1	0		0	1		1	0	0	0	0		1
407	Kaiwire	Curiapo	AD		0	0	0	0	0	0	0	0	0		35	1	0	1		0	0	0	0	1	0	0		0	0	1	0	0		0	0	0	1	0		1	0		0	0	0	0	1		0
408	Kaiwire	Curiapo	AD		0	0	0	0	0	0	0	0	0		28	1	0	1		0	1	0	0	0	0	0		0	0	1	0	0		0	0	0	1	0		1	0		0	0	0	0	1		0
409	Kaiwire	Curiapo	AD		0	0	0	0	0	0	0	0	0		30	1	1	1		0	1	0	0	0	0	0		0	0	0	1	0		0	0	0	1	0		1	0		0	1	0	0	0		1
410	Kaiwire	Curiapo	AD		0	0	0	0	0	0	0	0	0		23	1	1	1		0	0	0	0	1	0	0		0	0	0	1	0		0	0	0	1	0		0	1		0	1	0	0	0		0
411	Kaiwire	Curiapo	AD		0	0	0	0	0	0	0	0	0		33	1	0	0		0	1	0	0	0	0	0		0	0	0	1	0		0	0	0	1	0		1	0		0	1	0	0	0		0
412	Kaiwire	Curiapo	AD		0	0	0	0	0	0	0	0	0		25	1	0	0		0	1	0	0	0	0	0		0	0	0	1	0		0	0	0	1	0		1	0		0	0	0	0	1		0
413	Kaiwire	Curiapo	AD		0	0	0	0	0	0	0	0	0		50	1	0	0		0	0	0	0	1	0	0		0	0	0	1	0		0	0	0	1	0		1	0		0	1	0	0	0		0
414	Kaiwire	Curiapo	AD		0	0	0	0	0	0	0	0	0		21	1	0	0		0	1	0	0	0	0	0		0	1	0	0	0		0	0	0	1	0		0	1		0	0	0	0	1		0
415	Kaiwire	Curiapo	AD		0	0	0	0	0	0	0	0	0		27	1	1	0		0	1	0	0	0	0	0		0	0	0	1	0		0	0	0	1	0		0	1		0	0	1	0	0		0
416	Kaiwire	Curiapo	AD		0	0	0	0	0	0	0	0	0		53	1	0	0		0	1	0	0	0	0	0		0	0	0	1	0		0	0	0	1	0		1	0		0	0	1	0	0		0
417	Kaiwire	Curiapo	AD		0	0	0	0	0	0	0	0	0		71	1	0	0		0	1	0	0	0	0	0		0	1	0	0	0		0	0	0	1	0		1	0		0	0	0	0	1		0
418	Kaiwire	Curiapo	AD		0	0	0	0	0	0	0	0	0		20	1	0	0		0	0	0	0	1	0	0		0	1	0	0	0		0	0	0	1	0		1	0		0	0	0	0	0		0
419	Kaiwire	Curiapo	AD		0	0	1	0	0	0	0	0	1		46	1	1	0		0	1	0	0	0	0	0		0	0	0	1	0		0	0	0	1	0		1	0		0	0	0	0	1		0
420	Kaiwire	Curiapo	AD		0	0	0	0	0	0	0	0	0		40	1	0	0		0	1	0	0	0	0	0		0	0	0	1	0		0	0	0	1	0		1	0		0	0	0	0	1		1
4	Jotasanuka	Nabasanuka	AD		0	0	0	0	0	0	0	0	0		36	1	1	0		0	1	0	0	0	0	0		1	0	0	0	0		0	0	1	0	0		1	0
11	Barakaro	Nabasanuka	AD		0	0	0	0	0	0	0	0	0		53	1	1	0		0	1	0	0	0	0	0		0	0	0	0	1		0	0	0	1	0		1	0
12	Barakaro	Nabasanuka	AD		0	0	0	0	0	0	0	0	0		58	1	0	0		0	1	0	0	0	0	0		0	1	0	0	0		0	0	0	1	0		1	0
59	Kuarejoro	Nabasanuka	AD		0	0	0	0	0	0	0	0	0		36	1	1	0		0	1	0	0	0	0	0		0	1	0	0	0		1	0	0	0	0		1	0
60	Kuarejoro	Nabasanuka	AD		1	0	0	0	0	0	0	0	1		27	1	1	0		0	1	0	0	0	0	0		0	0	1	0	0		0	0	1	0	0		0	1
61	Kuarejoro	Nabasanuka	AD		0	0	0	0	0	0	0	0	0		18	0				0	1	0	0	0	0	0		1	0	0	0	0		0	0	0	1	0		0	1
62	Kuarejoro	Nabasanuka	AD		0	0	0	0	0	0	0	0	0		36	1	1	0		0	1	0	0	0	0	0		0	0	0	1	0		0	0	0	1	0		1	0
67	Mojabaina de Bonoina	Nabasanuka	AD		0	0	0	0	0	0	0	0	0		Unknown	1	1	0		0	1	0	0	0	0	0		0	0	0	1	0		0	0	0	1	0		1	0		0	0	0	0	0		0
68	Mojabaina de Bonoina	Nabasanuka	AD		0	0	1	0	0	0	0	0	1		39	1	0	1		0	1	0	0	0	0	0		0	1	0	0	0		0	0	0	1	0		1	0		1	0	0	0	0		0
69	Mojabaina de Bonoina	Nabasanuka	AD		0	0	0	0	0	0	0	0	0		23	1	1	1		0	1	0	0	0	0	0		0	0	0	1	0		0	0	0	1	0		1	0		0	1	0	0	0		1
70	Mojabaina de Bonoina	Nabasanuka	AD		0	0	0	0	0	0	0	0	0		68	1	1	1		0	1	0	0	0	0	0		0	0	0	1	0		0	0	0	1	0		1	0		0	1	0	0	0		0
149	Burojosanuka	Nabasanuka	AD		0	1	0	0	0	0	0	0	1		49	1	0	0		0	1	0	0	0	0	0		0	1	0	0	0		0	0	1	0	0		1	0		0	1	0	0	0		1
150	Burojosanuka	Nabasanuka	AD		0	0	0	0	0	0	0	0	0		45	1	0	0		0	1	0	0	0	0	0		0	1	0	0	0		0	0	0	1	0		1	0		0	1	0	0	0		1
151	Burojosanuka	Nabasanuka	AD		0	0	0	0	0	0	0	0	0		55	1	0	0		0	1	0	0	0	0	0		0	1	0	0	0		0	0	0	1	0		0	1		0	1	0	0	0		1
152	Burojosanuka	Nabasanuka	AD		0	0	0	0	0	0	0	0	0		60	1	0	0		0	1	0	0	0	0	0		0	1	0	0	0		0	0	0	1	0		1	0		0	0	0	0	0		1
153	Burojosanuka	Nabasanuka	AD		0	0	0	0	0	0	0	0	0		47	1	0	0		0	1	0	0	0	0	0		0	1	0	0	0		1	0	0	0	0		1	0		0	1	0	0	0		1
197	Jobasujuru	Nabasanuka	AD		0	0	0	0	0	0	1	0	1		34	1	1	0		0	1	0	0	0	0	1		0	0	1	0	0		0	0	0	1	0		1	0		1	0	0	0	0		0
198	Jobasujuru	Nabasanuka	AD		0	0	0	0	0	0	0	0	0		48	1	1	0		0	1	0	0	0	0	1		0	0	0	1	0		0	0	0	1	0		1	0		0	0	0	0	0		0
199	Jobasujuru	Nabasanuka	AD		0	0	0	0	0	0	0	0	0		32	1	1	0		0	0	0	0	1	0	0		0	0	0	1	0		0	0	0	1	0		1	0		0	0	0	0	1		0
200	Jobasujuru	Nabasanuka	AD		0	0	0	0	0	0	0	0	0		48	1	1	1		0	1	0	0	0	0	0		0	0	1	0	0		0	0	0	1	0		1	0		0	0	0	0	0		0
201	Jobasujuru	Nabasanuka	AD		0	0	0	0	0	0	0	0	0		Unknown	1	1	1		0	1	0	0	0	0	0		0	0	1	0	0		0	0	0	1	0		1	0		0	1	0	0	0		1
202	Jobasujuru	Nabasanuka	AD		0	0	0	0	0	0	0	0	0		Unknown	1	1	0		0	1	0	0	0	0	0		0	1	0	0	0		0	0	0	1	0		1	0		1	0	0	0	0		0
203	Jobasujuru	Nabasanuka	AD		0	0	0	0	0	0	0	0	0		42	1	1	0		0	1	0	0	0	0	0		0	0	1	0	0		1	0	0	0	0		1	0		0	1	0	0	0		0
243	Musimurina	Nabasanuka	AD		0	0	0	0	0	0	0	0	0		23	1	1	0		0	1	0	0	0	0	0		0	0	1	0	0		0	0	1	0	0		0	1		0	0	0	0	0		0
244	Musimurina	Nabasanuka	AD		0	0	0	0	0	0	0	0	0		53	1	1	1		0	1	0	0	0	0	0		0	0	1	0	0		0	0	1	0	0		0	1		0	0	0	0	0		0
245	Musimurina	Nabasanuka	AD		0	0	0	0	0	0	0	0	0		45	1	1	0		0	0	0	0	1	0	0		0	0	1	0	0		0	0	1	0	0		1	0		0	0	0	0	1		1
246	Musimurina	Nabasanuka	AD		0	0	0	0	0	0	0	0	0		40	1	1	1		0	1	0	0	0	0	0		0	0	1	0	0		0	0	1	0	0		1	0		0	0	1	0	0		1
247	Musimurina	Nabasanuka	AD		0	0	0	0	0	0	0	0	0		40	1	1	0		0	1	0	0	0	0	0		0	0	1	0	0		0	0	1	0	0		1	0		0	1	0	0	0		0
248	Musimurina	Nabasanuka	AD		0	0	0	0	0	0	0	0	0		46	1	1	0		0	1	0	0	0	0	0		0	1	0	0	0		0	0	1	0	0		1	0		0	0	0	0	0		0
249	Musimurina	Nabasanuka	AD		0	0	0	0	0	0	0	0	0		36	1	1	1		0	1	0	0	0	0	0		0	1	0	0	0		0	0	0	1	0		0	1		0	0	1	0	0		1
250	Musimurina	Nabasanuka	AD		0	0	0	0	0	0	0	0	0		17	1	1	1		0	0	0	0	1	0	0		0	1	0	0	0		0	0	0	1	0		0	1		0	1	0	0	0		0
251	Musimurina	Nabasanuka	AD		0	0	0	0	0	0	0	0	0		18	0				0	0	0	0	1	0	0		0	1	0	0	0		0	0	0	1	0		0	1		0	1	0	0	0		0
272	Siawani	Nabasanuka	AD		0	0	0	0	0	0	0	0	0		Unknown	1	0	0		0	1	0	0	0	0	0		0	1	0	0	0		0	0	0	1	0		1	0		0	1	0	0	0		1
273	Siawani	Nabasanuka	AD		0	0	0	0	0	0	0	0	0		57	1	0	0		0	1	0	0	0	0	0		0	0	0	1	0		0	0	0	1	0		0	1		0	1	0	0	0		1
274	Siawani	Nabasanuka	AD		0	0	0	0	0	0	0	0	0		30	1	0	0		0	1	0	0	0	0	0		0	0	0	1	0		0	0	0	1	0		1	0		0	0	0	0	1		0
275	Siawani	Nabasanuka	AD		0	0	0	0	0	0	0	0	0		27	0				0	1	0	0	0	0	0		0	0	0	1	0		0	0	0	1	0		1	0		1	0	0	0	0		1
276	Siawani	Nabasanuka	AD		0	0	0	0	0	0	0	0	0		40	1	1	1		0	1	0	0	0	0	0		0	0	0	1	0		0	0	0	1	0		1	0		0	0	0	0	1		0
277	Siawani	Nabasanuka	AD		0	0	0	0	0	0	0	0	0		45	1	1	1		0	1	0	0	0	0	0		0	0	0	1	0		0	0	0	1	0		1	0		0	0	0	0	0		0
278	Siawani	Nabasanuka	AD		0	0	0	0	0	0	0	0	0		46	1	0	0		0	1	0	0	0	0	0		0	0	0	1	0		0	0	0	1	0		1	0		0	0	0	0	0		1
279	Siawani	Nabasanuka	AD		0	0	0	0	0	0	0	0	0		37	1	1	0		0	1	0	0	0	0	0		0	0	0	1	0		0	0	0	1	0		1	0		0	0	0	0	0		1
280	Siawani	Nabasanuka	AD		0	0	0	0	0	0	0	0	0		37	1	0	0		0	1	0	0	0	0	0		0	0	0	1	0		0	0	0	1	0		1	0		0	0	1	0	0		0
281	Siawani	Nabasanuka	AD		0	0	0	0	0	0	1	0	1		45	1	1	1		0	1	0	0	0	0	0		0	0	1	0	0		0	0	1	0	0		1	0		0	1	0	0	0		0
331	Nabasanuka	Nabasanuka	AD		0	0	0	0	1	0	0	0	1		60	1	1	0		0	0	1	0	0	0	0		0	0	1	0	0		0	0	0	1	0		0	1
332	Nabasanuka	Nabasanuka	AD		1	0	0	0	0	0	0	0	1		23	1	1	1		1	0	0	0	0	0	0		0	1	0	0	0		0	0	1	0	0		1	0
333	Nabasanuka	Nabasanuka	AD		0	0	0	0	0	0	0	0	0		31	1	1	0		0	1	0	0	0	0	0		0	1	0	0	0		1	0	0	0	0		1	0
334	Nabasanuka	Nabasanuka	AD		0	0	0	0	0	0	0	0	0		Unknown	1	1	0		0	1	0	0	0	0	0		0	0	1	0	0		0	0	0	1	0		1	0
335	Nabasanuka	Nabasanuka	AD		0	1	0	0	0	0	0	0	1		34	1	1	1		0	1	0	0	0	0	0		0	1	0	0	0		0	0	1	0	0		1	0
336	Nabasanuka	Nabasanuka	AD		0	0	0	0	1	0	0	0	1		23	1	1	0		0	0	1	0	0	0	0		0	0	1	0	0		0	0	1	0	0		1	0
337	Nabasanuka	Nabasanuka	AD		0	0	0	0	0	0	0	0	0		70	1	1	0		0	1	0	0	0	0	0		0	1	0	0	0		0	0	1	0	0		0	1
338	Nabasanuka	Nabasanuka	AD		1	0	0	0	0	0	0	0	1		59	1	1	1		0	1	0	0	0	0	0		0	1	0	0	0		0	0	1	0	0		0	1
339	Nabasanuka	Nabasanuka	AD		0	0	0	0	0	0	0	0	0		31	1	1	0		0	1	0	0	0	0	0		0	0	1	0	0		0	0	1	0	0		0	1
340	Nabasanuka	Nabasanuka	AD		1	0	0	0	0	0	0	0	1		21	1	1	0		0	1	0	0	0	0	0		0	0	1	0	0		1	0	0	0	0		0	1
341	Nabasanuka	Nabasanuka	AD		0	1	0	0	0	0	0	0	1		Absent & Unknown	0				0	1	0	0	0	0	0		0	0	1	0	0		0	0	0	1	0		1	0
342	Nabasanuka	Nabasanuka	AD		0	0	0	0	0	0	0	0	0		38	1	1	0		0	1	0	0	0	0	0		0	0	1	0	0		0	0	1	0	0		1	0
343	Nabasanuka	Nabasanuka	AD		0	1	0	0	0	0	0	0	1		37	1	1	0		0	1	0	0	0	0	0		0	0	1	0	0		0	0	1	0	0		1	0
344	Nabasanuka	Nabasanuka	AD		1	0	0	0	0	0	0	0	1		32	1	1	0		0	1	0	0	0	0	0		0	0	1	0	0		0	0	1	0	0		1	0
345	Bonoina	Nabasanuka	AD		0	0	0	0	0	0	0	0	0		25	1	1	0		0	1	0	0	0	0	0		0	1	0	0	0		0	0	0	1	0		0	1		0	1	0	0	0		0
346	Bonoina	Nabasanuka	AD		0	1	0	0	0	0	0	0	1		35	1	1	1		0	1	0	0	0	0	0		0	1	0	0	0		0	0	0	1	0		0	1		0	1	0	0	0		0
347	Bonoina	Nabasanuka	AD		1	0	0	0	0	0	0	0	1		38	0				0	1	0	0	0	0	0		0	0	1	0	0		0	0	0	1	0		0	1		1	0	0	0	0		1
348	Bonoina	Nabasanuka	AD		0	1	0	0	0	0	0	0	1		41	1	1	1		0	1	0	0	0	0	0		0	0	0	1	0		0	0	0	1	0		1	0		0	1	0	0	0		0
349	Bonoina	Nabasanuka	AD		0	0	0	0	0	0	0	0	0		42	1	1	1		0	1	0	0	0	0	0		0	1	0	0	0		0	0	0	1	0		1	0		1	0	0	0	0		0
350	Bonoina	Nabasanuka	AD		1	0	0	0	0	0	0	0	1		34	1	1	1		0	1	0	0	0	0	0		0	1	0	0	0		0	0	0	1	0		1	0		0	1	0	0	0		0
351	Bonoina	Nabasanuka	AD		1	0	0	0	0	0	0	0	1		33	1	1	1		0	1	0	0	0	0	0		0	0	1	0	0		0	0	0	1	0		1	0		0	0	1	0	0		0
352	Bonoina	Nabasanuka	AD		0	0	0	0	0	0	0	0	0		58	1	1	1		0	1	0	0	0	0	0		0	1	0	0	0		0	0	0	1	0		1	0		0	0	1	0	0		1
353	Bonoina	Nabasanuka	AD		0	0	0	0	0	0	0	0	0		38	1	1	0		0	1	0	0	0	0	0		0	0	1	0	0		0	0	0	1	0		0	1		0	1	0	0	0		1
354	Bonoina	Nabasanuka	AD		0	0	0	0	0	0	0	0	0		38	1	1	1		0	1	0	0	0	0	0		0	0	1	0	0		0	0	0	1	0		1	0		0	1	0	0	0		1
355	Bonoina	Nabasanuka	AD		0	0	0	0	0	0	0	0	0		25	1	1	1		0	1	0	0	0	0	0		0	0	1	0	0		0	0	0	1	0		1	0		0	1	0	0	0		1
356	Bonoina	Nabasanuka	AD		0	0	0	0	0	0	0	0	0		55	1	1	0		0	1	0	0	0	0	0		0	0	1	0	0		0	0	0	1	0		1	0		0	0	0	0	1		0
357	Bonoina	Nabasanuka	AD		0	0	0	0	0	0	0	0	0		68	1	1	1		0	1	0	0	0	0	1		0	0	1	0	0		0	0	0	1	0		1	0		0	0	1	0	0		0
358	Bonoina	Nabasanuka	AD		0	0	0	0	0	0	0	0	0		68	1	1	1		0	1	0	0	0	0	0		0	0	1	0	0		0	0	0	1	0		1	0		0	0	1	0	0		0
359	Bonoina	Nabasanuka	AD		0	0	0	0	0	0	0	0	0		45	1	1	1		0	1	0	0	0	0	0		0	0	1	0	0		0	0	0	1	0		1	0		0	1	0	0	0		1
360	Bonoina	Nabasanuka	AD		1	0	0	0	0	0	0	0	1		56	1	1	1		0	1	0	0	0	0	0		0	0	1	0	0		0	0	0	1	0		1	0		0	0	0	0	0		0
361	Bonoina	Nabasanuka	AD		0	0	0	0	0	0	0	0	0		26	1	1	1		0	1	0	0	0	0	0		0	0	1	0	0		0	0	0	1	0		1	0		0	0	1	0	0		0
[truncated: 18 more columns]
