# Supplementary material for: Low Child Survival Index in a Multi-Dimensionally Poor Amerindian Population in Venezuela
Source: PLoS One. 2013 Dec 31;8(12):e85638. doi: 10.1371/journal.pone.0085638 (PMC3877389; doi:10.1371/journal.pone.0085638)
Supplement: Dataset S2 — Data of the MPI parameters. (XLS) [file pone.0085638.s002.xls]

## Sheet: Education Dimension
	Years of Schooling					Child School attendance
Municipality	Father: Primary School finished	Mother: Primary School finished	Years of Schooling Deprived	Points		Kids.house (7-14)	Schoolchild. House	Difference	School attendance Deprived	Points
PED	1	0	1	0.166667		1	0	1	1	0.166667
PED	0	0	1	0.166667		3	0	3	1	0.166667
PED	0	0	1	0.166667		3	0	3	1	0.166667
PED	0	0	1	0.166667		5	5	0	0	0
PED	1	0	1	0.166667		3	0	3	1	0.166667
PED	0	0	1	0.166667		6	0	6	1	0.166667
PED	1	0	1	0.166667		3	0	3	1	0.166667
PED	0	0	1	0.166667		1	0	1	1	0.166667
PED	0	0	1	0.166667		1	0	1	1	0.166667
PED	0	0	1	0.166667		7	7	0	0	0
PED	0	0	1	0.166667		2	1	1	1	0.166667
PED	0	0	1	0.166667		3	0	3	1	0.166667
PED	1	0	1	0.166667		4	4	0	0	0
PED	0	0	1	0.166667		1	0	1	1	0.166667
PED	0	0	1	0.166667		1	0	1	1	0.166667
PED	0	0	1	0.166667		2	0	2	1	0.166667
PED	0	0	1	0.166667		4	2	2	1	0.166667
PED	0	0	1	0.166667		7	4	3	1	0.166667
PED	0	0	1	0.166667		6	6	0	0	0
PED	0	0	1	0.166667		6	6	0	0	0
PED	0	0	1	0.166667		11	3	8	1	0.166667
PED	0	0	1	0.166667		11	3	8	1	0.166667
PED	1	0	1	0.166667		4	4	0	0	0
PED	0	0	1	0.166667		7	0	7	1	0.166667
PED	1	0	1	0.166667		4	4	0	0	0
PED	1	0	1	0.166667		4	3	1	1	0.166667
PED	1	0	1	0.166667		3	1	2	1	0.166667
PED	0	0	1	0.166667		3	2	1	1	0.166667
PED	0	0	1	0.166667		3	2	1	1	0.166667
PED	0	0	1	0.166667		5	2	3	1	0.166667
PED	1	0	1	0.166667		5	0	5	1	0.166667
PED	1	0	1	0.166667		3	1	2	1	0.166667
PED	1	0	1	0.166667		3	3	0	0	0
PED	0	0	1	0.166667		5	4	1	1	0.166667
PED	0	0	1	0.166667		4	2	2	1	0.166667
PED	1	0	1	0.166667		8	5	3	1	0.166667
PED	1	0	1	0.166667		8	5	3	1	0.166667
PED	0	0	1	0.166667		8	5	3	1	0.166667
PED	1	0	1	0.166667		5	5	0	0	0
PED	1	0	1	0.166667		1	0	1	1	0.166667
PED	0	0	1	0.166667		0	0	0	0	0
PED	0	0	1	0.166667		0	0	0	0	0
PED	0	0	1	0.166667		5	0	5	1	0.166667
PED	0	0	1	0.166667		5	0	5	1	0.166667
PED	0	0	1	0.166667		0	0	0	0	0
PED	0	0	1	0.166667		2	1	1	1	0.166667
PED	0	0	1	0.166667		2	1	1	1	0.166667
PED	1	1	0	0		4	0	4	1	0.166667
PED	0	0	1	0.166667		4	0	4	1	0.166667
PED	0	0	1	0.166667		6	1	5	1	0.166667
PED	1	0	1	0.166667		2	2	0	0	0
PED	0	0	1	0.166667		6	2	4	1	0.166667
PED	1	1	0	0		4	3	1	1	0.166667
PED	0	0	1	0.166667		7	2	5	1	0.166667
PED	1	1	0	0		7	2	5	1	0.166667
PED	1	0	1	0.166667		7	2	5	1	0.166667
PED	1	0	1	0.166667		7	2	5	1	0.166667
PED	1	0	1	0.166667		3	3	0	0	0
PED	0	0	1	0.166667		3	0	3	1	0.166667
PED	1	0	1	0.166667		2	1	1	1	0.166667
PED	0	0	1	0.166667		2	0	2	1	0.166667
PED	0	0	1	0.166667		5	0	5	1	0.166667
PED	0	0	1	0.166667		2	0	2	1	0.166667
PED	0	0	1	0.166667		5	0	5	1	0.166667
PED	1	0	1	0.166667		6	1	5	1	0.166667
PED	0	0	1	0.166667		6	1	5	1	0.166667
PED	1	0	1	0.166667		5	4	1	1	0.166667
PED	0	0	1	0.166667		10	6	4	1	0.166667
PED	0	0	1	0.166667		6	0	6	1	0.166667
PED	0	0	1	0.166667		2	0	2	1	0.166667
PED	1	0	1	0.166667		12	0	12	1	0.166667
PED	0	0	1	0.166667		12	0	12	1	0.166667
PED	0	0	1	0.166667		12	0	12	1	0.166667
PED	0	0	1	0.166667		12	0	12	1	0.166667
PED	0	0	1	0.166667		4	0	4	1	0.166667
PED	0	0	1	0.166667		4	4	0	0	0
PED	0	0	1	0.166667		4	0	4	1	0.166667
PED	0	0	1	0.166667		4	2	2	1	0.166667
PED	0	0	1	0.166667		4	0	4	1	0.166667
PED	0	0	1	0.166667		6	0	6	1	0.166667
PED	0	0	1	0.166667		5	0	5	1	0.166667
PED	0	0	1	0.166667		5	0	5	1	0.166667
PED	0	0	1	0.166667		5	0	5	1	0.166667
PED	0	0	1	0.166667		0	0	0	0	0
PED	0	0	1	0.166667		3	0	3	1	0.166667
PED	0	0	1	0.166667		3	0	3	1	0.166667
PED	0	0	1	0.166667		15	13	2	1	0.166667
PED	0	0	1	0.166667		15	13	2	1	0.166667
PED	0	0	1	0.166667		3	0	3	1	0.166667
PED	0	0	1	0.166667		3	0	3	1	0.166667
PED	1	0	1	0.166667		4	0	4	1	0.166667
PED	0	0	1	0.166667		5	4	1	1	0.166667
PED	0	0	1	0.166667		2	2	0	0	0
PED	0	0	1	0.166667		11	11	0	0	0
PED	0	0	1	0.166667		11	11	0	0	0
PED	0	0	1	0.166667		4	1	3	1	0.166667
PED	0	0	1	0.166667		13	1	12	1	0.166667
PED	0	0	1	0.166667		3	2	1	1	0.166667
TUC	1	0	1	0.166667		9	0	9	1	0.166667
TUC	1	0	1	0.166667		6	0	6	1	0.166667
TUC	0	0	1	0.166667		0	0	0	0	0
TUC	0	0	1	0.166667		3	0	3	1	0.166667
TUC	0	0	1	0.166667		10	0	10	1	0.166667
TUC	0	0	1	0.166667		10	0	10	1	0.166667
TUC	1	0	1	0.166667		10	0	10	1	0.166667
TUC	0	0	1	0.166667		10	0	10	1	0.166667
TUC	0	0	1	0.166667		8	0	8	1	0.166667
TUC	0	0	1	0.166667		8	0	8	1	0.166667
TUC	0	0	1	0.166667		3	0	3	1	0.166667
TUC	0	0	1	0.166667		8	0	8	1	0.166667
TUC	0	0	1	0.166667		5	0	5	1	0.166667
TUC	1	0	1	0.166667		3	0	3	1	0.166667
TUC	1	0	1	0.166667		3	3	0	0	0
TUC	0	0	1	0.166667		4	0	4	1	0.166667
TUC	0	0	1	0.166667		6	0	6	1	0.166667
TUC	0	0	1	0.166667		3	0	3	1	0.166667
TUC	0	0	1	0.166667		0	0	0	0	0
TUC	0	0	1	0.166667		1	0	1	1	0.166667
TUC	0	0	1	0.166667		1	0	1	1	0.166667
TUC	0	0	1	0.166667		0	0	0	0	0
TUC	0	0	1	0.166667		6	0	6	1	0.166667
TUC	0	0	1	0.166667		7	0	7	1	0.166667
TUC	0	0	1	0.166667		7	0	7	1	0.166667
TUC	0	0	1	0.166667		3	1	2	1	0.166667
TUC	0	0	1	0.166667		2	0	2	1	0.166667
TUC	1	0	1	0.166667		3	0	3	1	0.166667
TUC	0	0	1	0.166667		6	0	6	1	0.166667
TUC	0	0	1	0.166667		6	0	6	1	0.166667
TUC	0	0	1	0.166667		6	0	6	1	0.166667
TUC	0	0	1	0.166667		6	0	6	1	0.166667
TUC	1	0	1	0.166667		24	0	24	1	0.166667
TUC	0	0	1	0.166667		24	0	24	1	0.166667
TUC	0	0	1	0.166667		24	0	24	1	0.166667
TUC	1	0	1	0.166667		9	0	9	1	0.166667
TUC	0	0	1	0.166667		9	0	9	1	0.166667
TUC	1	0	1	0.166667		9	0	9	1	0.166667
TUC	0	0	1	0.166667		9	0	9	1	0.166667
TUC	0	0	1	0.166667		4	0	4	1	0.166667
TUC	0	0	1	0.166667		4	0	4	1	0.166667
TUC	0	0	1	0.166667		4	0	4	1	0.166667
TUC	0	0	1	0.166667		7	0	7	1	0.166667
TUC	0	0	1	0.166667		7	0	7	1	0.166667
TUC	0	0	1	0.166667		7	0	7	1	0.166667
TUC	1	0	1	0.166667		5	0	5	1	0.166667
TUC	0	0	1	0.166667		5	0	5	1	0.166667
TUC	0	0	1	0.166667		2	0	2	1	0.166667
TUC	0	0	1	0.166667		2	0	2	1	0.166667
TUC	1	0	1	0.166667		6	0	6	1	0.166667
TUC	0	0	1	0.166667		6	0	6	1	0.166667
TUC	1	0	1	0.166667		6	0	6	1	0.166667
TUC	0	0	1	0.166667		1	0	1	1	0.166667
TUC	1	1	0	0		14	0	14	1	0.166667
TUC	1	0	1	0.166667		5	0	5	1	0.166667
TUC	1	0	1	0.166667		6	0	6	1	0.166667
TUC	1	1	0	0		3	0	3	1	0.166667
TUC	1	0	1	0.166667		2	0	2	1	0.166667
TUC	1	0	1	0.166667		3	0	3	1	0.166667
TUC	0	0	1	0.166667		11	7	4	1	0.166667
TUC	1	0	1	0.166667		11	7	4	1	0.166667
TUC	0	0	1	0.166667		2	2	0	0	0
TUC	1	0	1	0.166667		4	4	0	0	0
TUC	1	0	1	0.166667		8	1	7	1	0.166667
TUC	1	0	1	0.166667		6	5	1	1	0.166667
TUC	1	0	1	0.166667		7	2	5	1	0.166667
TUC	1	0	1	0.166667		5	5	0	0	0
TUC	1	0	1	0.166667		3	2	1	1	0.166667
TUC	1	0	1	0.166667		4	0	4	1	0.166667
TUC	1	0	1	0.166667		5	0	5	1	0.166667
TUC	0	0	1	0.166667		5	0	5	1	0.166667
TUC	1	0	1	0.166667		5	0	5	1	0.166667
TUC	1	0	1	0.166667		3	0	3	1	0.166667
TUC	1	0	1	0.166667		2	0	2	1	0.166667
TUC	1	0	1	0.166667		2	0	2	1	0.166667
TUC	0	0	1	0.166667		6	0	6	1	0.166667
TUC	0	0	1	0.166667		5	0	5	1	0.166667
TUC	0	0	1	0.166667		3	0	3	1	0.166667
TUC	0	0	1	0.166667		6	0	6	1	0.166667
TUC	1	0	1	0.166667		6	0	6	1	0.166667
TUC	0	0	1	0.166667		6	0	6	1	0.166667
TUC	1	0	1	0.166667		8	0	8	1	0.166667
TUC	0	0	1	0.166667		5	0	5	1	0.166667
TUC	0	0	1	0.166667		5	0	5	1	0.166667
TUC	0	0	1	0.166667		4	0	4	1	0.166667
TUC	1	0	1	0.166667		1	0	1	1	0.166667
TUC	1	1	0	0		4	0	4	1	0.166667
TUC	1	1	0	0		3	0	3	1	0.166667
TUC	1	1	0	0		3	0	3	1	0.166667
TUC	1	0	1	0.166667		4	0	4	1	0.166667
TUC	1	0	1	0.166667		1	0	1	1	0.166667
AD	0	0	1	0.166667		4	0	4	1	0.166667
AD	0	0	1	0.166667		11	0	11	1	0.166667
AD	0	0	1	0.166667		9	0	9	1	0.166667
AD	1	0	1	0.166667		7	0	7	1	0.166667
AD	0	0	1	0.166667		3	0	3	1	0.166667
AD	0	0	1	0.166667		1	0	1	1	0.166667
AD	0	0	1	0.166667		7	0	7	1	0.166667
AD	0	0	1	0.166667		2	0	2	1	0.166667
AD	0	0	1	0.166667		1	0	1	1	0.166667
AD	1	0	1	0.166667		3	2	1	1	0.166667
AD	0	0	1	0.166667		7	0	7	1	0.166667
AD	1	0	1	0.166667		2	0	2	1	0.166667
AD	0	0	1	0.166667		1	0	1	1	0.166667
AD	0	0	1	0.166667		2	0	2	1	0.166667
AD	1	0	1	0.166667		7	3	4	1	0.166667
AD	1	0	1	0.166667		7	3	4	1	0.166667
AD	0	0	1	0.166667		6	5	1	1	0.166667
AD	0	0	1	0.166667		6	5	1	1	0.166667
AD	1	0	1	0.166667		5	3	2	1	0.166667
AD	0	0	1	0.166667		5	4	1	1	0.166667
AD	0	0	1	0.166667		5	4	1	1	0.166667
AD	1	0	1	0.166667		1	1	0	0	0
AD	0	0	1	0.166667		5	0	5	1	0.166667
AD	1	0	1	0.166667		5	0	5	1	0.166667
AD	1	0	1	0.166667		5	0	5	1	0.166667
AD	0	0	1	0.166667		2	0	2	1	0.166667
AD	0	0	1	0.166667		2	0	2	1	0.166667
AD	1	0	1	0.166667		6	4	2	1	0.166667
AD	0	0	1	0.166667		2	0	2	1	0.166667
AD	1	0	1	0.166667		0	0	0	0	0
AD	1	0	1	0.166667		1	0	1	1	0.166667
AD	1	0	1	0.166667		8	4	4	1	0.166667
AD	0	0	1	0.166667		3	1	2	1	0.166667
AD	0	0	1	0.166667		3	0	3	1	0.166667
AD	0	0	1	0.166667		4	2	2	1	0.166667
AD	0	0	1	0.166667		5	3	2	1	0.166667
AD	0	0	1	0.166667		4	3	1	1	0.166667
AD	0	0	1	0.166667		2	0	2	1	0.166667
AD	0	0	1	0.166667		4	0	4	1	0.166667
AD	0	0	1	0.166667		2	0	2	1	0.166667
AD	0	0	1	0.166667		3	0	3	1	0.166667
AD	0	0	1	0.166667		6	0	6	1	0.166667
AD	0	0	1	0.166667		2	0	2	1	0.166667
AD	0	0	1	0.166667		10	0	10	1	0.166667
AD	1	0	1	0.166667		6	0	6	1	0.166667
AD	0	0	1	0.166667		2	0	2	1	0.166667
AD	0	0	1	0.166667		5	0	5	1	0.166667
AD	0	0	1	0.166667		5	0	5	1	0.166667
AD	1	0	1	0.166667		1	0	1	1	0.166667
AD	1	0	1	0.166667		4	3	1	1	0.166667
AD	1	0	1	0.166667		4	4	0	0	0
AD	1	1	0	0		3	0	3	1	0.166667
AD	0	0	1	0.166667		7	5	2	1	0.166667
AD	0	0	1	0.166667		7	5	2	1	0.166667
AD	1	0	1	0.166667		7	5	2	1	0.166667
AD	1	0	1	0.166667		7	5	2	1	0.166667
AD	0	0	1	0.166667		2	1	1	1	0.166667
AD	0	0	1	0.166667		1	0	1	1	0.166667
AD	0	0	1	0.166667		2	1	1	1	0.166667
AD	0	0	1	0.166667		3	2	1	1	0.166667
AD	0	0	1	0.166667		1	1	0	0	0
AD	1	0	1	0.166667		2	1	1	1	0.166667
AD	0	0	1	0.166667		1	1	0	0	0
AD	0	0	1	0.166667		2	2	0	0	0
AD	0	0	1	0.166667		2	1	1	1	0.166667
AD	0	0	1	0.166667		2	1	1	1	0.166667
AD	0	0	1	0.166667		3	2	1	1	0.166667
AD	0	0	1	0.166667		4	2	2	1	0.166667
AD	0	0	1	0.166667		2	0	2	1	0.166667
AD	0	0	1	0.166667		2	0	2	1	0.166667
AD	0	0	1	0.166667		9	0	9	1	0.166667
AD	0	0	1	0.166667		9	0	9	1	0.166667
AD	0	0	1	0.166667		6	0	6	1	0.166667
AD	1	1	0	0		1	1	0	0	0
AD	0	0	1	0.166667		6	0	6	1	0.166667
AD	0	0	1	0.166667		6	0	6	1	0.166667
AD	0	0	1	0.166667		4	0	4	1	0.166667
AD	0	0	1	0.166667		1	1	0	0	0
AD	1	0	1	0.166667		6	0	6	1	0.166667
AD	1	0	1	0.166667		6	0	6	1	0.166667
AD	1	0	1	0.166667		2	0	2	1	0.166667
AD	0	0	1	0.166667		1	1	0	0	0
AD	1	0	1	0.166667		1	1	0	0	0
AD	0	0	1	0.166667		0	0	0	0	0
AD	1	0	1	0.166667		6	6	0	0	0
AD	0	0	1	0.166667		6	6	0	0	0
AD	0	0	1	0.166667		3	1	2	1	0.166667
AD	1	0	1	0.166667		3	1	2	1	0.166667
AD	0	0	1	0.166667		4	1	3	1	0.166667
AD	0	0	1	0.166667		5	1	4	1	0.166667
AD	0	0	1	0.166667		5	1	4	1	0.166667
AD	1	0	1	0.166667		5	1	4	1	0.166667
AD	1	0	1	0.166667		3	0	3	1	0.166667
AD	1	0	1	0.166667		4	3	1	1	0.166667
AD	1	0	1	0.166667		5	5	0	0	0
AD	1	0	1	0.166667		3	3	0	0	0
AD	1	0	1	0.166667		3	2	1	1	0.166667
AD	1	0	1	0.166667		4	2	2	1	0.166667
AD	0	0	1	0.166667		1	0	1	1	0.166667
AD	0	0	1	0.166667		5	0	5	1	0.166667
AD	0	0	1	0.166667		2	0	2	1	0.166667
AD	0	0	1	0.166667		3	0	3	1	0.166667
AD	0	0	1	0.166667		3	0	3	1	0.166667
AD	0	0	1	0.166667		1	0	1	1	0.166667
AD	0	0	1	0.166667		4	0	4	1	0.166667
AD	0	0	1	0.166667		6	4	2	1	0.166667
AD	0	0	1	0.166667		1	0	1	1	0.166667
AD	0	0	1	0.166667		4	0	4	1	0.166667
AD	0	0	1	0.166667		7	7	0	0	0
AD	0	0	1	0.166667		7	0	7	1	0.166667
AD	0	0	1	0.166667		7	0	7	1	0.166667
AD	0	0	1	0.166667		7	0	7	1	0.166667
AD	1	0	1	0.166667		7	0	7	1	0.166667
AD	1	0	1	0.166667		7	7	0	0	0
AD	0	0	1	0.166667		2	2	0	0	0
AD	0	0	1	0.166667		2	0	2	1	0.166667
AD	0	0	1	0.166667		6	6	0	0	0
AD	0	0	1	0.166667		5	0	5	1	0.166667
AD	0	0	1	0.166667		10	0	10	1	0.166667
AD	0	0	1	0.166667		10	0	10	1	0.166667
AD	1	0	1	0.166667		3	1	2	1	0.166667
AD	1	1	0	0		7	5	2	1	0.166667
AD	1	0	1	0.166667		3	2	1	1	0.166667
AD	1	0	1	0.166667		6	2	4	1	0.166667
AD	1	0	1	0.166667		4	2	2	1	0.166667
AD	0	0	1	0.166667		3	0	3	1	0.166667
AD	1	0	1	0.166667		4	3	1	1	0.166667
AD	0	0	1	0.166667		5	3	2	1	0.166667
AD	0	0	1	0.166667		3	1	2	1	0.166667
AD	1	0	1	0.166667		1	0	1	1	0.166667
AD	1	0	1	0.166667		5	2	3	1	0.166667
AD	0	0	1	0.166667		0	0	0	0	0
AD	0	0	1	0.166667		1	0	1	1	0.166667
AD	0	0	1	0.166667		2	0	2	1	0.166667
AD	1	1	0	0		8	0	8	1	0.166667
AD	0	0	1	0.166667		8	0	8	1	0.166667
AD	0	0	1	0.166667		6	1	5	1	0.166667
AD	1	0	1	0.166667		3	0	3	1	0.166667
AD	0	0	1	0.166667		2	0	2	1	0.166667
AD	1	0	1	0.166667		3	0	3	1	0.166667
AD	0	0	1	0.166667		3	0	3	1	0.166667
AD	0	0	1	0.166667		8	0	8	1	0.166667
AD	0	0	1	0.166667		8	1	7	1	0.166667
AD	0	0	1	0.166667		8	0	8	1	0.166667
AD	0	0	1	0.166667		4	0	4	1	0.166667
AD	0	0	1	0.166667		1	0	1	1	0.166667
AD	1	0	1	0.166667		3	1	2	1	0.166667
AD	0	0	1	0.166667		2	2	0	0	0
AD	1	0	1	0.166667		2	1	1	1	0.166667
AD	1	0	1	0.166667		4	4	0	0	0
AD	0	0	1	0.166667		7	6	1	1	0.166667
AD	1	0	1	0.166667		5	3	2	1	0.166667
AD	1	0	1	0.166667		5	0	5	1	0.166667
AD	1	0	1	0.166667		5	0	5	1	0.166667
AD	1	1	0	0		5	0	5	1	0.166667
AD	0	0	1	0.166667		5	0	5	1	0.166667
AD	0	0	1	0.166667		3	0	3	1	0.166667
AD	0	0	1	0.166667		12	0	12	1	0.166667
AD	0	0	1	0.166667		12	0	12	1	0.166667
AD	1	0	1	0.166667		3	0	3	1	0.166667
AD	1	1	0	0		2	1	1	1	0.166667
AD	1	0	1	0.166667		3	3	0	0	0
AD	1	0	1	0.166667		1	1	0	0	0
AD	1	1	0	0		6	5	1	1	0.166667
AD	1	0	1	0.166667		2	0	2	1	0.166667
AD	1	0	1	0.166667		2	0	2	1	0.166667
AD	1	0	1	0.166667		3	1	2	1	0.166667
AD	0	0	1	0.166667		2	0	2	1	0.166667
AD	0	0	1	0.166667		2	0	2	1	0.166667
AD	0	0	1	0.166667		4	0	4	1	0.166667
AD	0	0	1	0.166667		4	0	4	1	0.166667
AD	0	0	1	0.166667		2	0	2	1	0.166667
AD	1	0	1	0.166667		3	0	3	1	0.166667
AD	0	0	1	0.166667		2	0	2	1	0.166667
AD	0	0	1	0.166667		2	0	2	1	0.166667
AD	1	0	1	0.166667		1	0	1	1	0.166667
AD	0	0	1	0.166667		2	0	2	1	0.166667
AD	0	0	1	0.166667		2	2	0	0	0
AD	0	0	1	0.166667		1	0	1	1	0.166667
AD	0	0	1	0.166667		5	3	2	1	0.166667
AD	1	0	1	0.166667		3	1	2	1	0.166667
AD	1	0	1	0.166667		6	4	2	1	0.166667
AD	0	0	1	0.166667		6	4	2	1	0.166667
AD	1	0	1	0.166667		3	0	3	1	0.166667
AD	0	0	1	0.166667		2	1	1	1	0.166667
AD	1	0	1	0.166667		3	2	1	1	0.166667
AD	1	0	1	0.166667		5	0	5	1	0.166667
AD	0	0	1	0.166667		5	0	5	1	0.166667
AD	1	0	1	0.166667		2	1	1	1	0.166667
AD	1	0	1	0.166667		5	2	3	1	0.166667
AD	1	0	1	0.166667		1	0	1	1	0.166667
AD	1	0	1	0.166667		2	0	2	1	0.166667
AD	1	0	1	0.166667		1	0	1	1	0.166667
AD	1	0	1	0.166667		3	0	3	1	0.166667
AD	1	0	1	0.166667		5	0	5	1	0.166667
AD	0	0	1	0.166667		3	0	3	1	0.166667
AD	0	0	1	0.166667		1	1	0	0	0
AD	1	0	1	0.166667		0	0	0	0	0
AD	1	1	0	0		5	2	3	1	0.166667
AD	1	0	1	0.166667		4	2	2	1	0.166667
AD	0	0	1	0.166667		1	1	0	0	0
AD	1	0	1	0.166667		3	2	1	1	0.166667
AD	0	0	1	0.166667		8	6	2	1	0.166667
AD	1	0	1	0.166667		2	1	1	1	0.166667
AD	1	0	1	0.166667		3	1	2	1	0.166667
AD	0	0	1	0.166667		1	0	1	1	0.166667
AD	0	0	1	0.166667		8	0	8	1	0.166667
AD	1	1	0	0		9	7	2	1	0.166667
AD	0	0	1	0.166667		0	0	0	0	0
AD	1	0	1	0.166667		2	0	2	1	0.166667
AD	0	0	1	0.166667		9	7	2	1	0.166667
AD	1	0	1	0.166667		6	4	2	1	0.166667
AD	0	0	1	0.166667		6	3	3	1	0.166667
AD	1	0	1	0.166667		6	3	3	1	0.166667
AD	1	1	0	0		2	1	1	1	0.166667
AD	1	0	1	0.166667		1	1	0	0	0
AD	1	0	1	0.166667		1	0	1	1	0.166667
AD	1	0	1	0.166667		2	0	2	1	0.166667
AD	1	1	0	0		2	1	1	1	0.166667
AD	0	0	1	0.166667		4	0	4	1	0.166667
AD	0	0	1	0.166667		1	0	1	1	0.166667
AD	0	0	1	0.166667		1	0	1	1	0.166667
AD	1	1	0	0		7	7	0	0	0
AD	0	0	1	0.166667		4	0	4	1	0.166667
AD	1	0	1	0.166667		4	3	1	1	0.166667
AD	1	0	1	0.166667		5	2	3	1	0.166667
AD	1	0	1	0.166667		4	0	4	1	0.166667
AD	0	0	1	0.166667		2	1	1	1	0.166667
AD	0	0	1	0.166667		2	1	1	1	0.166667
AD	1	0	1	0.166667		0	0	0	0	0
AD	1	0	1	0.166667		5	3	2	1	0.166667
AD	1	0	1	0.166667		1	0	1	1	0.166667
AD	1	0	1	0.166667		5	4	1	1	0.166667
AD	1	0	1	0.166667		4	2	2	1	0.166667
AD	0	0	1	0.166667		5	2	3	1	0.166667
AD	1	0	1	0.166667		5	2	3	1	0.166667
AD	1	1	0	0		9	5	4	1	0.166667
AD	1	0	1	0.166667		9	5	4	1	0.166667
AD	0	0	1	0.166667		9	5	4	1	0.166667
AD	1	1	0	0		11	5	6	1	0.166667
AD	1	1	0	0		11	5	6	1	0.166667
AD	1	1	0	0		3	0	3	1	0.166667
AD	0	0	1	0.166667		6	2	4	1	0.166667
AD	1	0	1	0.166667		3	2	1	1	0.166667
AD	0	0	1	0.166667		5	2	3	1	0.166667
AD	1	0	1	0.166667		3	1	2	1	0.166667
AD	1	0	1	0.166667		4	2	2	1	0.166667
AD	1	1	0	0		2	1	1	1	0.166667
AD	1	0	1	0.166667		3	1	2	1	0.166667
AD	1	0	1	0.166667		3	2	1	1	0.166667
AD	1	1	0	0		2	0	2	1	0.166667
AD	1	0	1	0.166667		1	0	1	1	0.166667
AD	1	1	0	0		5	0	5	1	0.166667
AD	0	0	1	0.166667		1	0	1	1	0.166667
AD	1	0	1	0.166667		7	6	1	1	0.166667
AD	0	0	1	0.166667		3	2	1	1	0.166667
AD	1	0	1	0.166667		6	0	6	1	0.166667
AD	1	0	1	0.166667		4	3	1	1	0.166667
AD	1	0	1	0.166667		1	0	1	1	0.166667
AD	1	0	1	0.166667		5	3	2	1	0.166667
AD	1	0	1	0.166667		1	1	0	0	0
AD	0	0	1	0.166667		3	3	0	0	0
AD	0	0	1	0.166667		3	3	0	0	0
AD	1	1	0	0		3	3	0	0	0
AD	1	0	1	0.166667		6	4	2	1	0.166667
AD	1	1	0	0		4	3	1	1	0.166667
AD	1	1	0	0		3	3	0	0	0
AD	1	1	0	0		3	2	1	1	0.166667
AD	1	1	0	0		3	2	1	1	0.166667
AD	1	0	1	0.166667		5	3	2	1	0.166667
AD	1	1	0	0		8	0	8	1	0.166667
AD	1	1	0	0		4	2	2	1	0.166667
AD	1	1	0	0		3	2	1	1	0.166667
AD	1	1	0	0		10	6	4	1	0.166667
AD	0	0	1	0.166667		10	6	4	1	0.166667
AD	0	0	1	0.166667		8	6	2	1	0.166667
AD	0	0	1	0.166667		8	6	2	1	0.166667
AD	1	0	1	0.166667		4	2	2	1	0.166667
AD	1	1	0	0		4	2	2	1	0.166667
AD	1	1	0	0		4	2	2	1	0.166667
AD	1	0	1	0.166667		3	3	0	0	0
AD	1	0	1	0.166667		3	3	0	0	0
AD	1	1	0	0		4	3	1	1	0.166667
AD	0	0	1	0.166667		4	3	1	1	0.166667
AD	1	1	0	0		4	3	1	1	0.166667
AD	1	1	0	0		5	3	2	1	0.166667
AD	1	0	1	0.166667		5	3	2	1	0.166667
AD	0	0	1	0.166667		5	3	2	1	0.166667
AD	0	0	1	0.166667		1	0	1	1	0.166667
AD	0	0	1	0.166667		1	0	1	1	0.166667
AD	1	1	0	0		1	0	1	1	0.166667
AD	1	0	1	0.166667		3	2	1	1	0.166667
AD	1	0	1	0.166667		5	4	1	1	0.166667
AD	1	0	1	0.166667		3	2	1	1	0.166667
AD	1	1	0	0		5	4	1	1	0.166667
AD	1	1	0	0		5	4	1	1	0.166667
AD	1	0	1	0.166667		5	4	1	1	0.166667
AD	1	1	0	0		5	4	1	1	0.166667
AD	0	0	1	0.166667		2	2	0	0	0
AD	1	1	0	0		2	0	2	1	0.166667
AD	1	0	1	0.166667		1	1	0	0	0
AD	1	1	0	0		3	2	1	1	0.166667
AD	1	0	1	0.166667		3	3	0	0	0
AD	1	0	1	0.166667		5	0	5	1	0.166667
AD	1	1	0	0		5	0	5	1	0.166667
AD	1	0	1	0.166667		2	0	2	1	0.166667
AD	1	0	1	0.166667		6	2	4	1	0.166667
AD	1	1	0	0		1	0	1	1	0.166667
AD	1	0	1	0.166667		2	1	1	1	0.166667
AD	1	0	1	0.166667		7	4	3	1	0.166667
AD	1	0	1	0.166667		2	1	1	1	0.166667
AD	1	0	1	0.166667		5	0	5	1	0.166667
AD	1	1	0	0		5	4	1	1	0.166667
AD	1	0	1	0.166667		1	0	1	1	0.166667
AD	1	0	1	0.166667		0	0	0	0	0
AD	1	1	0	0		3	2	1	1	0.166667
AD	0	0	1	0.166667		5	3	2	1	0.166667
AD	0	0	1	0.166667		3	1	2	1	0.166667
AD	1	0	1	0.166667		10	7	3	1	0.166667
AD	0	0	1	0.166667		2	0	2	1	0.166667
AD	0	0	1	0.166667		0	0	0	0	0
AD	0	0	1	0.166667		2	1	1	1	0.166667
AD	1	1	0	0		1	0	1	1	0.166667
AD	0	0	1	0.166667		4	3	1	1	0.166667
AD	1	1	0	0		2	1	1	1	0.166667
AD	0	0	1	0.166667		4	2	2	1	0.166667
AD	0	0	1	0.166667		3	2	1	1	0.166667
AD	0	0	1	0.166667		4	3	1	1	0.166667
AD	1	1	0	0		1	0	1	1	0.166667
AD	1	0	1	0.166667		6	2	4	1	0.166667
AD	0	0	1	0.166667		5	5	0	0	0
AD	1	0	1	0.166667		3	2	1	1	0.166667
AD	0	0	1	0.166667		0	0	0	0	0
AD	0	0	1	0.166667		3	0	3	1	0.166667
AD	1	0	1	0.166667		2	0	2	1	0.166667
AD	0	0	1	0.166667		0	0	0	0	0
AD	0	0	1	0.166667		1	0	1	1	0.166667
AD	0	0	1	0.166667		1	0	1	1	0.166667
AD	0	0	1	0.166667		3	0	3	1	0.166667
AD	0	0	1	0.166667		0	0	0	0	0
AD	0	0	1	0.166667		3	0	3	1	0.166667
AD	0	0	1	0.166667		4	0	4	1	0.166667
AD	0	0	1	0.166667		3	0	3	1	0.166667
AD	0	0	1	0.166667		0	0	0	0	0
AD	0	0	1	0.166667		4	0	4	1	0.166667
AD	0	0	1	0.166667		0	0	0	0	0
AD	0	0	1	0.166667		2	0	2	1	0.166667
AD	0	0	1	0.166667		0	0	0	0	0
AD	0	0	1	0.166667		8	0	8	1	0.166667
AD	0	0	1	0.166667		0	0	0	0	0
AD	0	0	1	0.166667		5	0	5	1	0.166667
AD	0	0	1	0.166667		3	0	3	1	0.166667
AD	0	0	1	0.166667		6	0	6	1	0.166667
AD	0	0	1	0.166667		2	0	2	1	0.166667
AD	0	0	1	0.166667		2	0	2	1	0.166667
AD	0	0	1	0.166667		2	0	2	1	0.166667
AD	0	0	1	0.166667		5	3	2	1	0.166667
AD	1	0	1	0.166667		4	0	4	1	0.166667
AD	0	0	1	0.166667		1	0	1	1	0.166667
AD	0	0	1	0.166667		5	0	5	1	0.166667
AD	0	0	1	0.166667		8	0	8	1	0.166667
AD	0	0	1	0.166667		1	0	1	1	0.166667
AD	0	0	1	0.166667		2	0	2	1	0.166667
AD	1	0	1	0.166667		3	0	3	1	0.166667
AD	0	0	1	0.166667		4	0	4	1	0.166667
AD	0	0	1	0.166667		4	0	4	1	0.166667
AD	0	0	1	0.166667		7	0	7	1	0.166667
AD	0	0	1	0.166667		5	0	5	1	0.166667
AD	1	0	1	0.166667		0	0	0	0	0
AD	1	0	1	0.166667		1	0	1	1	0.166667
AD	1	0	1	0.166667		3	0	3	1	0.166667
AD	0	0	1	0.166667		2	0	2	1	0.166667
AD	0	0	1	0.166667		2	0	2	1	0.166667
AD	0	0	1	0.166667		2	0	2	1	0.166667
AD	0	0	1	0.166667		4	0	4	1	0.166667
AD	0	0	1	0.166667		4	0	4	1	0.166667
AD	1	0	1	0.166667		7	5	2	1	0.166667
AD	0	0	1	0.166667		3	2	1	1	0.166667
AD	0	0	1	0.166667		0	0	0	0	0
AD	0	0	1	0.166667		2	1	1	1	0.166667
AD	0	0	1	0.166667		3	0	3	1	0.166667
AD	1	0	1	0.166667		4	2	2	1	0.166667
AD	1	1	0	0		4	2	2	1	0.166667
AD	1	0	1	0.166667		4	2	2	1	0.166667
AD	0	0	1	0.166667		3	0	3	1	0.166667
AD	0	0	1	0.166667		4	3	1	1	0.166667
AD	0	0	1	0.166667		4	2	2	1	0.166667
AD	1	1	0	0		4	0	4	1	0.166667
AD	1	0	1	0.166667		11	11	0	0	0
AD	0	0	1	0.166667		8	8	0	0	0
AD	0	0	1	0.166667		5	5	0	0	0
AD	1	0	1	0.166667		4	4	0	0	0
AD	1	0	1	0.166667		3	0	3	1	0.166667
AD	1	0	1	0.166667		7	7	0	0	0
AD	1	0	1	0.166667		5	5	0	0	0
AD	1	1	0	0		2	2	0	0	0
AD	1	0	1	0.166667		6	6	0	0	0
AD	1	0	1	0.166667		5	0	5	1	0.166667
AD	1	0	1	0.166667		8	6	2	1	0.166667
AD	1	0	1	0.166667		6	6	0	0	0
AD	1	1	0	0		7	7	0	0	0
AD	1	0	1	0.166667		3	3	0	0	0
AD	0	0	1	0.166667		3	0	3	1	0.166667
AD	1	0	1	0.166667		1	0	1	1	0.166667
AD	0	0	1	0.166667		4	0	4	1	0.166667
AD	0	0	1	0.166667		2	2	0	0	0
AD	0	0	1	0.166667		2	0	2	1	0.166667
AD	1	0	1	0.166667		1	1	0	0	0
AD	0	0	1	0.166667		4	2	2	1	0.166667
AD	0	0	1	0.166667		4	2	2	1	0.166667
AD	0	0	1	0.166667		5	5	0	0	0
AD	1	0	1	0.166667		4	2	2	1	0.166667
AD	1	0	1	0.166667		5	2	3	1	0.166667
AD	1	0	1	0.166667		5	3	2	1	0.166667
AD	1	0	1	0.166667		3	3	0	0	0
AD	1	0	1	0.166667		6	3	3	1	0.166667
AD	0	0	1	0.166667		3	1	2	1	0.166667
AD	0	0	1	0.166667		4	3	1	1	0.166667
AD	0	0	1	0.166667		2	0	2	1	0.166667
AD	0	0	1	0.166667		2	0	2	1	0.166667
AD	0	0	1	0.166667		4	4	0	0	0
AD	0	0	1	0.166667		2	2	0	0	0
AD	0	0	1	0.166667		3	1	2	1	0.166667
AD	0	0	1	0.166667		1	0	1	1	0.166667
AD	0	0	1	0.166667		2	2	0	0	0
AD	0	0	1	0.166667		2	2	0	0	0
AD	1	1	0	0		4	0	4	1	0.166667
AD	1	1	0	0		3	0	3	1	0.166667
AD	0	0	1	0.166667		0	0	0	0	0
AD	0	0	1	0.166667		3	0	3	1	0.166667
AD	1	1	0	0		2	0	2	1	0.166667
AD	0	0	1	0.166667		6	0	6	1	0.166667
AD	1	0	1	0.166667		4	0	4	1	0.166667
AD	0	0	1	0.166667		4	0	4	1	0.166667
AD	1	1	0	0		1	1	0	0	0
AD	1	0	1	0.166667		2	0	2	1	0.166667
AD	1	0	1	0.166667		3	0	3	1	0.166667
AD	0	0	1	0.166667		5	0	5	1	0.166667
AD	0	0	1	0.166667		7	0	7	1	0.166667
AD	0	0	1	0.166667		4	0	4	1	0.166667
AD	0	0	1	0.166667		2	0	2	1	0.166667
AD	0	0	1	0.166667		2	0	2	1	0.166667
AD	0	0	1	0.166667		7	7	0	0	0
AD	0	0	1	0.166667		7	7	0	0	0
AD	0	0	1	0.166667		4	3	1	1	0.166667
AD	1	0	1	0.166667		5	2	3	1	0.166667
AD	1	0	1	0.166667		8	5	3	1	0.166667
AD	0	0	1	0.166667		3	2	1	1	0.166667
AD	0	0	1	0.166667		1	0	1	1	0.166667
AD	0	0	1	0.166667		5	5	0	0	0
AD	1	0	1	0.166667		5	5	0	0	0
AD	0	0	1	0.166667		4	0	4	1	0.166667
AD	1	0	1	0.166667		6	0	6	1	0.166667
AD	0	0	1	0.166667		2	2	0	0	0
AD	0	0	1	0.166667		1	0	1	1	0.166667
AD	1	0	1	0.166667		8	2	6	1	0.166667
AD	1	0	1	0.166667		5	4	1	1	0.166667
AD	1	0	1	0.166667		5	4	1	1	0.166667
AD	0	0	1	0.166667		0	0	0	0	0
AD	0	0	1	0.166667		0	0	0	0	0
AD	0	0	1	0.166667		5	4	1	1	0.166667
AD	0	0	1	0.166667		1	0	1	1	0.166667
AD	1	0	1	0.166667		3	1	2	1	0.166667
AD	1	0	1	0.166667		3	2	1	1	0.166667
AD	0	0	1	0.166667		3	2	1	1	0.166667
AD	0	0	1	0.166667		3	3	0	0	0
AD	0	0	1	0.166667		6	6	0	0	0
AD	1	1	0	0		2	2	0	0	0
AD	0	0	1	0.166667		5	5	0	0	0
AD	1	1	0	0		1	1	0	0	0
AD	1	0	1	0.166667		3	2	1	1	0.166667
AD	1	0	1	0.166667		2	1	1	1	0.166667
AD	1	1	0	0		3	3	0	0	0
AD	1	1	0	0		3	3	0	0	0
AD	1	1	0	0		7	7	0	0	0
AD	1	0	1	0.166667		7	6	1	1	0.166667
AD	1	1	0	0		5	5	0	0	0
AD	1	1	0	0		3	3	0	0	0
AD	0	0	1	0.166667		1	1	0	0	0
AD	1	1	0	0		5	4	1	1	0.166667
AD	1	1	0	0		1	1	0	0	0
AD	1	1	0	0		3	3	0	0	0
AD	1	1	0	0		6	5	1	1	0.166667
AD	1	0	1	0.166667		6	5	1	1	0.166667
AD	1	1	0	0		2	1	1	1	0.166667
AD	1	1	0	0		4	4	0	0	0
AD	1	0	1	0.166667		3	3	0	0	0
AD	1	0	1	0.166667		4	3	1	1	0.166667
AD	1	0	1	0.166667		6	4	2	1	0.166667
AD	1	1	0	0		5	3	2	1	0.166667
AD	1	1	0	0		4	1	3	1	0.166667
AD	1	0	1	0.166667		5	2	3	1	0.166667
AD	1	0	1	0.166667		3	0	3	1	0.166667
AD	0	0	1	0.166667		5	0	5	1	0.166667
AD	1	0	1	0.166667		1	1	0	0	0
AD	1	0	1	0.166667		3	1	2	1	0.166667
AD	1	1	0	0		7	1	6	1	0.166667
AD	1	0	1	0.166667		2	2	0	0	0
AD	1	0	1	0.166667		3	1	2	1	0.166667

## Sheet: Health Dimension
	Child Mortality
Municipality	live births who died	Child Mortality Deprived	Points
PED	0	0	0
PED	12	1	0.166667
PED	2	1	0.166667
PED	2	1	0.166667
PED	0	0	0
PED	5	1	0.166667
PED	0	0	0
PED	2	1	0.166667
PED	9	1	0.166667
PED	1	1	0.166667
PED	0	0	0
PED	6	1	0.166667
PED	6	1	0.166667
PED	1	1	0.166667
PED	6	1	0.166667
PED	2	1	0.166667
PED	1	1	0.166667
PED	1	1	0.166667
PED	0	0	0
PED	1	1	0.166667
PED	1	1	0.166667
PED	6	1	0.166667
PED	0	0	0
PED	0	0	0
PED	2	1	0.166667
PED	4	1	0.166667
PED	2	1	0.166667
PED	1	1	0.166667
PED	2	1	0.166667
PED	1	1	0.166667
PED	1	1	0.166667
PED	2	1	0.166667
PED	0	0	0
PED	3	1	0.166667
PED	2	1	0.166667
PED	0	0	0
PED	0	0	0
PED	3	1	0.166667
PED	4	1	0.166667
PED	6	1	0.166667
PED	3	1	0.166667
PED	1	1	0.166667
PED	0	0	0
PED	3	1	0.166667
PED	3	1	0.166667
PED	3	1	0.166667
PED	2	1	0.166667
PED	0	0	0
PED	1	1	0.166667
PED	2	1	0.166667
PED	0	0	0
PED	1	1	0.166667
PED	0	0	0
PED	6	1	0.166667
PED	1	1	0.166667
PED	4	1	0.166667
PED	1	1	0.166667
PED	1	1	0.166667
PED	0	0	0
PED	0	0	0
PED	2	1	0.166667
PED	0	0	0
PED	2	1	0.166667
PED	0	0	0
PED	0	0	0
PED	4	1	0.166667
PED	0	0	0
PED	1	1	0.166667
PED	0	0	0
PED	2	1	0.166667
PED	0	0	0
PED	5	1	0.166667
PED	0	0	0
PED	2	1	0.166667
PED	3	1	0.166667
PED	0	0	0
PED	4	1	0.166667
PED	1	1	0.166667
PED	0	0	0
PED	4	1	0.166667
PED	4	1	0.166667
PED	6	1	0.166667
PED	1	1	0.166667
PED	5	1	0.166667
PED	6	1	0.166667
PED	4	1	0.166667
PED	4	1	0.166667
PED	4	1	0.166667
PED	10	1	0.166667
PED	1	1	0.166667
PED	6	1	0.166667
PED	5	1	0.166667
PED	2	1	0.166667
PED	0	0	0
PED	1	1	0.166667
PED	0	0	0
PED	1	1	0.166667
PED	2	1	0.166667
TUC	3	1	0.166667
TUC	3	1	0.166667
TUC	4	1	0.166667
TUC	6	1	0.166667
TUC	1	1	0.166667
TUC	7	1	0.166667
TUC	6	1	0.166667
TUC	4	1	0.166667
TUC	1	1	0.166667
TUC	1	1	0.166667
TUC	0	0	0
TUC	0	0	0
TUC	2	1	0.166667
TUC	0	0	0
TUC	0	0	0
TUC	2	1	0.166667
TUC	0	0	0
TUC	2	1	0.166667
TUC	1	1	0.166667
TUC	4	1	0.166667
TUC	4	1	0.166667
TUC	1	1	0.166667
TUC	3	1	0.166667
TUC	10	1	0.166667
TUC	1	1	0.166667
TUC	0	0	0
TUC	1	1	0.166667
TUC	0	0	0
TUC	2	1	0.166667
TUC	8	1	0.166667
TUC	0	0	0
TUC	7	1	0.166667
TUC	5	1	0.166667
TUC	7	1	0.166667
TUC	4	1	0.166667
TUC	4	1	0.166667
TUC	10	1	0.166667
TUC	0	0	0
TUC	2	1	0.166667
TUC	2	1	0.166667
TUC	11	1	0.166667
TUC	6	1	0.166667
TUC	0	0	0
TUC	15	1	0.166667
TUC	1	1	0.166667
TUC	0	0	0
TUC	6	1	0.166667
TUC	10	1	0.166667
TUC	0	0	0
TUC	0	0	0
TUC	0	0	0
TUC	0	0	0
TUC	1	1	0.166667
TUC	1	1	0.166667
TUC	2	1	0.166667
TUC	0	0	0
TUC	2	1	0.166667
TUC	0	0	0
TUC	0	0	0
TUC	2	1	0.166667
TUC	0	0	0
TUC	2	1	0.166667
TUC	1	1	0.166667
TUC	3	1	0.166667
TUC	0	0	0
TUC	2	1	0.166667
TUC	1	1	0.166667
TUC	2	1	0.166667
TUC	1	1	0.166667
TUC	0	0	0
TUC	0	0	0
TUC	5	1	0.166667
TUC	3	1	0.166667
TUC	1	1	0.166667
TUC	0	0	0
TUC	2	1	0.166667
TUC	4	1	0.166667
TUC	1	1	0.166667
TUC	2	1	0.166667
TUC	0	0	0
TUC	0	0	0
TUC	0	0	0
TUC	2	1	0.166667
TUC	0	0	0
TUC	5	1	0.166667
TUC	1	1	0.166667
TUC	8	1	0.166667
TUC	0	0	0
TUC	0	0	0
TUC	0	0	0
TUC	2	1	0.166667
AD	0	0	0
AD	0	0	0
AD	1	1	0.166667
AD	1	1	0.166667
AD	0	0	0
AD	0	0	0
AD	2	1	0.166667
AD	1	1	0.166667
AD	0	0	0
AD	1	1	0.166667
AD	1	1	0.166667
AD	0	0	0
AD	2	1	0.166667
AD	6	1	0.166667
AD	2	1	0.166667
AD	1	1	0.166667
AD	3	1	0.166667
AD	1	1	0.166667
AD	1	1	0.166667
AD	0	0	0
AD	0	0	0
AD	0	0	0
AD	3	1	0.166667
AD	0	0	0
AD	0	0	0
AD	1	1	0.166667
AD	3	1	0.166667
AD	2	1	0.166667
AD	2	1	0.166667
AD	1	1	0.166667
AD	2	1	0.166667
AD	0	0	0
AD	0	0	0
AD	1	1	0.166667
AD	1	1	0.166667
AD	8	1	0.166667
AD	2	1	0.166667
AD	1	1	0.166667
AD	6	1	0.166667
AD	4	1	0.166667
AD	5	1	0.166667
AD	0	0	0
AD	3	1	0.166667
AD	4	1	0.166667
AD	8	1	0.166667
AD	1	1	0.166667
AD	0	0	0
AD	1	1	0.166667
AD	0	0	0
AD	3	1	0.166667
AD	1	1	0.166667
AD	1	1	0.166667
AD	7	1	0.166667
AD	3	1	0.166667
AD	1	1	0.166667
AD	1	1	0.166667
AD	4	1	0.166667
AD	1	1	0.166667
AD	2	1	0.166667
AD	4	1	0.166667
AD	4	1	0.166667
AD	3	1	0.166667
AD	0	0	0
AD	0	0	0
AD	0	0	0
AD	0	0	0
AD	5	1	0.166667
AD	2	1	0.166667
AD	0	0	0
AD	4	1	0.166667
AD	4	1	0.166667
AD	2	1	0.166667
AD	0	0	0
AD	2	1	0.166667
AD	0	0	0
AD	1	1	0.166667
AD	2	1	0.166667
AD	3	1	0.166667
AD	3	1	0.166667
AD	0	0	0
AD	0	0	0
AD	0	0	0
AD	1	1	0.166667
AD	6	1	0.166667
AD	0	0	0
AD	3	1	0.166667
AD	1	1	0.166667
AD	0	0	0
AD	1	1	0.166667
AD	1	1	0.166667
AD	0	0	0
AD	6	1	0.166667
AD	1	1	0.166667
AD	1	1	0.166667
AD	3	1	0.166667
AD	2	1	0.166667
AD	2	1	0.166667
AD	0	0	0
AD	0	0	0
AD	2	1	0.166667
AD	1	1	0.166667
AD	5	1	0.166667
AD	1	1	0.166667
AD	3	1	0.166667
AD	1	1	0.166667
AD	2	1	0.166667
AD	0	0	0
AD	2	1	0.166667
AD	0	0	0
AD	8	1	0.166667
AD	5	1	0.166667
AD	0	0	0
AD	1	1	0.166667
AD	0	0	0
AD	0	0	0
AD	2	1	0.166667
AD	0	0	0
AD	5	1	0.166667
AD	3	1	0.166667
AD	1	1	0.166667
AD	4	1	0.166667
AD	0	0	0
AD	4	1	0.166667
AD	3	1	0.166667
AD	0	0	0
AD	3	1	0.166667
AD	0	0	0
AD	0	0	0
AD	1	1	0.166667
AD	5	1	0.166667
AD	4	1	0.166667
AD	3	1	0.166667
AD	3	1	0.166667
AD	2	1	0.166667
AD	0	0	0
AD	1	1	0.166667
AD	2	1	0.166667
AD	1	1	0.166667
AD	4	1	0.166667
AD	0	0	0
AD	7	1	0.166667
AD	3	1	0.166667
AD	3	1	0.166667
AD	4	1	0.166667
AD	5	1	0.166667
AD	0	0	0
AD	2	1	0.166667
AD	8	1	0.166667
AD	0	0	0
AD	0	0	0
AD	0	0	0
AD	2	1	0.166667
AD	0	0	0
AD	0	0	0
AD	0	0	0
AD	0	0	0
AD	1	1	0.166667
AD	2	1	0.166667
AD	5	1	0.166667
AD	1	1	0.166667
AD	0	0	0
AD	1	1	0.166667
AD	2	1	0.166667
AD	0	0	0
AD	0	0	0
AD	0	0	0
AD	0	0	0
AD	6	1	0.166667
AD	2	1	0.166667
AD	4	1	0.166667
AD	1	1	0.166667
AD	1	1	0.166667
AD	4	1	0.166667
AD	7	1	0.166667
AD	1	1	0.166667
AD	1	1	0.166667
AD	1	1	0.166667
AD	2	1	0.166667
AD	2	1	0.166667
AD	2	1	0.166667
AD	2	1	0.166667
AD	1	1	0.166667
AD	3	1	0.166667
AD	0	0	0
AD	1	1	0.166667
AD	1	1	0.166667
AD	1	1	0.166667
AD	2	1	0.166667
AD	2	1	0.166667
AD	1	1	0.166667
AD	0	0	0
AD	6	1	0.166667
AD	0	0	0
AD	2	1	0.166667
AD	0	0	0
AD	0	0	0
AD	5	1	0.166667
AD	1	1	0.166667
AD	1	1	0.166667
AD	4	1	0.166667
AD	5	1	0.166667
AD	2	1	0.166667
AD	1	1	0.166667
AD	0	0	0
AD	1	1	0.166667
AD	0	0	0
AD	1	1	0.166667
AD	0	0	0
AD	1	1	0.166667
AD	1	1	0.166667
AD	1	1	0.166667
AD	3	1	0.166667
AD	0	0	0
AD	0	0	0
AD	0	0	0
AD	2	1	0.166667
AD	1	1	0.166667
AD	2	1	0.166667
AD	1	1	0.166667
AD	1	1	0.166667
AD	0	0	0
AD	2	1	0.166667
AD	1	1	0.166667
AD	9	1	0.166667
AD	2	1	0.166667
AD	0	0	0
AD	0	0	0
AD	9	1	0.166667
AD	5	1	0.166667
AD	1	1	0.166667
AD	2	1	0.166667
AD	0	0	0
AD	3	1	0.166667
AD	0	0	0
AD	1	1	0.166667
AD	0	0	0
AD	0	0	0
AD	1	1	0.166667
AD	9	1	0.166667
AD	2	1	0.166667
AD	0	0	0
AD	3	1	0.166667
AD	2	1	0.166667
AD	2	1	0.166667
AD	2	1	0.166667
AD	1	1	0.166667
AD	1	1	0.166667
AD	0	0	0
AD	1	1	0.166667
AD	4	1	0.166667
AD	0	0	0
AD	1	1	0.166667
AD	1	1	0.166667
AD	3	1	0.166667
AD	0	0	0
AD	0	0	0
AD	0	0	0
AD	0	0	0
AD	0	0	0
AD	0	0	0
AD	3	1	0.166667
AD	3	1	0.166667
AD	4	1	0.166667
AD	0	0	0
AD	1	1	0.166667
AD	0	0	0
AD	0	0	0
AD	0	0	0
AD	0	0	0
AD	0	0	0
AD	0	0	0
AD	0	0	0
AD	0	0	0
AD	1	1	0.166667
AD	3	1	0.166667
AD	5	1	0.166667
AD	0	0	0
AD	0	0	0
AD	0	0	0
AD	0	0	0
AD	0	0	0
AD	0	0	0
AD	0	0	0
AD	2	1	0.166667
AD	0	0	0
AD	0	0	0
AD	0	0	0
AD	0	0	0
AD	1	1	0.166667
AD	5	1	0.166667
AD	0	0	0
AD	1	1	0.166667
AD	0	0	0
AD	6	1	0.166667
AD	0	0	0
AD	0	0	0
AD	0	0	0
AD	0	0	0
AD	6	1	0.166667
AD	0	0	0
AD	0	0	0
AD	0	0	0
AD	0	0	0
AD	0	0	0
AD	3	1	0.166667
AD	0	0	0
AD	4	1	0.166667
AD	2	1	0.166667
AD	5	1	0.166667
AD	0	0	0
AD	0	0	0
AD	0	0	0
AD	0	0	0
AD	3	1	0.166667
AD	0	0	0
AD	0	0	0
AD	0	0	0
AD	1	1	0.166667
AD	0	0	0
AD	10	1	0.166667
AD	2	1	0.166667
AD	0	0	0
AD	0	0	0
AD	0	0	0
AD	0	0	0
AD	2	1	0.166667
AD	1	1	0.166667
AD	2	1	0.166667
AD	0	0	0
AD	0	0	0
AD	2	1	0.166667
AD	1	1	0.166667
AD	0	0	0
AD	1	1	0.166667
AD	2	1	0.166667
AD	0	0	0
AD	2	1	0.166667
AD	5	1	0.166667
AD	0	0	0
AD	1	1	0.166667
AD	3	1	0.166667
AD	0	0	0
AD	1	1	0.166667
AD	3	1	0.166667
AD	0	0	0
AD	1	1	0.166667
AD	0	0	0
AD	1	1	0.166667
AD	0	0	0
AD	4	1	0.166667
AD	4	1	0.166667
AD	0	0	0
AD	0	0	0
AD	1	1	0.166667
AD	0	0	0
AD	0	0	0
AD	3	1	0.166667
AD	1	1	0.166667
AD	0	0	0
AD	0	0	0
AD	0	0	0
AD	4	1	0.166667
AD	1	1	0.166667
AD	2	1	0.166667
AD	1	1	0.166667
AD	1	1	0.166667
AD	4	1	0.166667
AD	1	1	0.166667
AD	1	1	0.166667
AD	2	1	0.166667
AD	2	1	0.166667
AD	3	1	0.166667
AD	2	1	0.166667
AD	2	1	0.166667
AD	0	0	0
AD	1	1	0.166667
AD	0	0	0
AD	0	0	0
AD	5	1	0.166667
AD	0	0	0
AD	0	0	0
AD	0	0	0
AD	2	1	0.166667
AD	1	1	0.166667
AD	0	0	0
AD	1	1	0.166667
AD	1	1	0.166667
AD	0	0	0
AD	1	1	0.166667
AD	1	1	0.166667
AD	1	1	0.166667
AD	1	1	0.166667
AD	4	1	0.166667
AD	0	0	0
AD	0	0	0
AD	0	0	0
AD	1	1	0.166667
AD	4	1	0.166667
AD	2	1	0.166667
AD	0	0	0
AD	1	1	0.166667
AD	1	1	0.166667
AD	6	1	0.166667
AD	2	1	0.166667
AD	6	1	0.166667
AD	2	1	0.166667
AD	3	1	0.166667
AD	4	1	0.166667
AD	3	1	0.166667
AD	0	0	0
AD	1	1	0.166667
AD	0	0	0
AD	1	1	0.166667
AD	6	1	0.166667
AD	0	0	0
AD	0	0	0
AD	4	1	0.166667
AD	2	1	0.166667
AD	1	1	0.166667
AD	2	1	0.166667
AD	2	1	0.166667
AD	0	0	0
AD	5	1	0.166667
AD	0	0	0
AD	6	1	0.166667
AD	4	1	0.166667
AD	0	0	0
AD	7	1	0.166667
AD	3	1	0.166667
AD	1	1	0.166667
AD	0	0	0
AD	0	0	0
AD	4	1	0.166667
AD	0	0	0
AD	0	0	0
AD	0	0	0
AD	2	1	0.166667
AD	0	0	0
AD	4	1	0.166667
AD	10	1	0.166667
AD	6	1	0.166667
AD	7	1	0.166667
AD	2	1	0.166667
AD	1	1	0.166667
AD	0	0	0
AD	3	1	0.166667
AD	1	1	0.166667
AD	0	0	0
AD	2	1	0.166667
AD	2	1	0.166667
AD	3	1	0.166667
AD	0	0	0
AD	4	1	0.166667
AD	3	1	0.166667
AD	3	1	0.166667
AD	1	1	0.166667
AD	0	0	0
AD	0	0	0
AD	1	1	0.166667
AD	5	1	0.166667
AD	2	1	0.166667
AD	0	0	0
AD	2	1	0.166667
AD	1	1	0.166667
AD	0	0	0
AD	1	1	0.166667
AD	1	1	0.166667
AD	1	1	0.166667
AD	1	1	0.166667
AD	0	0	0
AD	3	1	0.166667
AD	2	1	0.166667
AD	0	0	0
AD	0	0	0
AD	3	1	0.166667
AD	2	1	0.166667
AD	0	0	0
AD	0	0	0
AD	1	1	0.166667
AD	2	1	0.166667
AD	0	0	0
AD	1	1	0.166667
AD	0	0	0
AD	1	1	0.166667
AD	0	0	0
AD	0	0	0
AD	0	0	0
AD	0	0	0
AD	0	0	0
AD	3	1	0.166667
AD	3	1	0.166667
AD	0	0	0
AD	0	0	0
AD	2	1	0.166667
AD	0	0	0
AD	7	1	0.166667
AD	0	0	0
AD	2	1	0.166667
AD	0	0	0

## Sheet: Living Standards Dimension
	Electricity						Sanitation								Drinking Water								Floor				Cooking Fuel				Assetts
Municipality	Electric Portable Generator in the Household	Power Plant Community	SUM	Electricity Deprived	Points		Shared Latrine	Wihout bathroom/Latrine	Latrine pour flush to elsewhere	Sewage System absent	SUM	Sanitation Deprived	Points		Tap Water Presence	Communal taps Presence	SUM	Without Access to drinking water	Drinking water without treatment	Drinking Water Deprived	Points		Sand or Dung Floor	Floor Deprived	Points		Gas cooker absent/cook with wood	Cooking Fuel Deprived	Points		1 Outboard Motor	2 Outboard Motor	Handcrafted canoe	SUM	Assetts Deprived	Points
PED	0	1	1	0	0		0	1	0	1	2	1	0.0555556		0	0	0	1	1	1	0.0555556		0	0	0		0	1	0.0555556		1	0	1	2	0	0
PED	0	1	1	0	0		0	1	0	1	2	1	0.0555556		0	0	0	1	1	1	0.0555556		0	0	0		0	1	0.0555556		0	0	0	0	1	0.0555556
PED	0	1	1	0	0		0	1	0	1	2	1	0.0555556		0	0	0	1	1	1	0.0555556		0	0	0		0	1	0.0555556		0	0	1	1	0	0
PED	0	1	1	0	0		0	1	0	1	2	1	0.0555556		0	0	0	1	1	1	0.0555556		0	0	0		0	1	0.0555556		0	0	0	0	1	0.0555556
PED	0	1	1	0	0		0	1	0	1	2	1	0.0555556		0	0	0	1	1	1	0.0555556		0	0	0		0	1	0.0555556		0	0	0	0	1	0.0555556
PED	0	1	1	0	0		0	1	0	1	2	1	0.0555556		0	0	0	1	1	1	0.0555556		0	0	0		0	1	0.0555556		1	0	0	1	0	0
PED	0	1	1	0	0		0	1	0	1	2	1	0.0555556		0	0	0	1	1	1	0.0555556		0	0	0		0	1	0.0555556		0	0	0	0	1	0.0555556
PED	0	1	1	0	0		0	1	0	1	2	1	0.0555556		0	0	0	1	1	1	0.0555556		0	0	0		0	1	0.0555556		0	0	0	0	1	0.0555556
PED	0	1	1	0	0		0	1	0	1	2	1	0.0555556		0	0	0	1	1	1	0.0555556		0	0	0		0	1	0.0555556		1	0	1	2	0	0
PED	0	1	1	0	0		0	1	0	1	2	1	0.0555556		0	0	0	1	1	1	0.0555556		0	0	0		0	1	0.0555556		1	0	1	2	0	0
PED	0	1	1	0	0		0	1	0	1	2	1	0.0555556		0	0	0	1	1	1	0.0555556		0	0	0		0	1	0.0555556		1	0	1	2	0	0
PED	0	1	1	0	0		0	1	0	1	2	1	0.0555556		0	0	0	1	1	1	0.0555556		0	0	0		0	1	0.0555556		1	0	1	2	0	0
PED	1	1	2	0	0		0	1	0	1	2	1	0.0555556		0	0	0	1	1	1	0.0555556		0	0	0		1	0	0		1	0	1	2	0	0
PED	0	1	1	0	0		0	1	0	1	2	1	0.0555556		0	0	0	1	1	1	0.0555556		0	0	0		0	1	0.0555556		1	0	1	2	0	0
PED	0	1	1	0	0		0	1	0	1	2	1	0.0555556		0	0	0	1	1	1	0.0555556		0	0	0		1	0	0		1	0	1	2	0	0
PED	0	1	1	0	0		0	1	0	1	2	1	0.0555556		0	0	0	1	1	1	0.0555556		0	0	0		0	1	0.0555556		1	0	0	1	0	0
PED	0	1	1	0	0		0	1	0	1	2	1	0.0555556		0	0	0	1	1	1	0.0555556		0	0	0		0	1	0.0555556		0	0	1	1	0	0
PED	0	1	1	0	0		0	1	0	1	2	1	0.0555556		0	0	0	1	1	1	0.0555556		0	0	0		0	1	0.0555556		1	0	0	1	0	0
PED	0	1	1	0	0		0	1	0	1	2	1	0.0555556		0	0	0	1	1	1	0.0555556		0	0	0		0	1	0.0555556		1	0	1	2	0	0
PED	0	1	1	0	0		0	1	0	1	2	1	0.0555556		0	0	0	1	1	1	0.0555556		0	0	0		0	1	0.0555556		1	0	1	2	0	0
PED	0	1	1	0	0		0	1	0	1	2	1	0.0555556		0	0	0	1	1	1	0.0555556		0	0	0		0	1	0.0555556		0	0	1	1	0	0
PED	0	1	1	0	0		0	1	0	1	2	1	0.0555556		0	0	0	1	1	1	0.0555556		0	0	0		0	1	0.0555556		0	0	1	1	0	0
PED	0	1	1	0	0		0	1	0	1	2	1	0.0555556		0	0	0	1	1	1	0.0555556		0	0	0		0	1	0.0555556		0	0	0	0	1	0.0555556
PED	0	1	1	0	0		0	1	0	1	2	1	0.0555556		0	0	0	1	1	1	0.0555556		0	0	0		0	1	0.0555556		0	0	0	0	1	0.0555556
PED	0	1	1	0	0		0	1	0	1	2	1	0.0555556		0	0	0	1	1	1	0.0555556		0	0	0		0	1	0.0555556		1	0	1	2	0	0
PED	0	1	1	0	0		0	1	0	1	2	1	0.0555556		0	0	0	1	1	1	0.0555556		0	0	0		0	1	0.0555556		0	0	0	0	1	0.0555556
PED	0	1	1	0	0		0	1	0	1	2	1	0.0555556		0	0	0	1	1	1	0.0555556		0	0	0		0	1	0.0555556		0	0	0	0	1	0.0555556
PED	1	1	2	0	0		0	1	0	1	2	1	0.0555556		0	0	0	1	1	1	0.0555556		0	0	0		1	0	0		1	0	1	2	0	0
PED	1	1	2	0	0		0	1	0	1	2	1	0.0555556		0	0	0	1	1	1	0.0555556		0	0	0		1	0	0		1	0	1	2	0	0
PED	0	1	1	0	0		0	1	0	1	2	1	0.0555556		0	0	0	1	1	1	0.0555556		0	0	0		1	0	0		1	0	1	2	0	0
PED	0	1	1	0	0		0	1	0	1	2	1	0.0555556		0	0	0	1	1	1	0.0555556		1	1	0.0555556		0	1	0.0555556		1	0	1	2	0	0
PED	0	0	0	1	0.0555556		0	1	0	1	2	1	0.0555556		0	0	0	1	1	1	0.0555556		0	0	0		0	1	0.0555556		1	0	1	2	0	0
PED	1	0	1	0	0		0	1	0	1	2	1	0.0555556		0	0	0	1	1	1	0.0555556		0	0	0		1	0	0		1	0	0	1	0	0
PED	0	0	0	1	0.0555556		0	1	0	1	2	1	0.0555556		0	0	0	1	1	1	0.0555556		0	0	0		0	1	0.0555556		0	0	0	0	1	0.0555556
PED	1	0	1	0	0		0	1	0	1	2	1	0.0555556		0	0	0	1	1	1	0.0555556		0	0	0		0	1	0.0555556		1	0	1	2	0	0
PED	0	0	0	1	0.0555556		0	1	0	1	2	1	0.0555556		0	0	0	1	1	1	0.0555556		0	0	0		0	1	0.0555556		1	0	1	2	0	0
PED	0	0	0	1	0.0555556		0	1	0	1	2	1	0.0555556		0	0	0	1	1	1	0.0555556		0	0	0		0	1	0.0555556		1	0	1	2	0	0
PED	0	0	0	1	0.0555556		0	1	0	1	2	1	0.0555556		0	0	0	1	1	1	0.0555556		0	0	0		0	1	0.0555556		1	0	1	2	0	0
PED	1	0	1	0	0		0	1	0	1	2	1	0.0555556		0	0	0	1	1	1	0.0555556		0	0	0		0	1	0.0555556		1	0	1	2	0	0
PED	0	0	0	1	0.0555556		0	1	0	1	2	1	0.0555556		0	0	0	1	1	1	0.0555556		0	0	0		0	1	0.0555556		1	0	1	2	0	0
PED	0	0	0	1	0.0555556		0	1	0	1	2	1	0.0555556		0	0	0	1	1	1	0.0555556		0	0	0		0	1	0.0555556		1	0	0	1	0	0
PED	0	0	0	1	0.0555556		0	1	0	1	2	1	0.0555556		0	0	0	1	1	1	0.0555556		0	0	0		0	1	0.0555556		1	0	0	1	0	0
PED	0	0	0	1	0.0555556		0	1	0	1	2	1	0.0555556		0	0	0	1	1	1	0.0555556		0	0	0		0	1	0.0555556		0	0	1	1	0	0
PED	0	0	0	1	0.0555556		0	1	0	1	2	1	0.0555556		0	0	0	1	1	1	0.0555556		0	0	0		0	1	0.0555556		0	0	1	1	0	0
PED	0	0	0	1	0.0555556		0	1	0	1	2	1	0.0555556		0	0	0	1	1	1	0.0555556		0	0	0		0	1	0.0555556		0	0	0	0	1	0.0555556
PED	0	0	0	1	0.0555556		0	0	1	1	2	1	0.0555556		0	0	0	1	1	1	0.0555556		0	0	0		1	0	0		0	0	0	0	1	0.0555556
PED	1	0	1	0	0		0	0	0	1	1	1	0.0555556		0	0	0	1	1	1	0.0555556		0	0	0		1	0	0		0	0	0	0	1	0.0555556
PED	0	0	0	1	0.0555556		0	0	1	1	2	1	0.0555556		0	0	0	1	1	1	0.0555556		0	0	0		0	1	0.0555556		1	0	1	2	0	0
PED	0	0	0	1	0.0555556		0	0	1	1	2	1	0.0555556		0	0	0	1	1	1	0.0555556		0	0	0		0	1	0.0555556		1	0	1	2	0	0
PED	0	0	0	1	0.0555556		0	0	1	1	2	1	0.0555556		0	0	0	1	1	1	0.0555556		0	0	0		0	1	0.0555556		0	0	0	0	1	0.0555556
PED	0	0	0	1	0.0555556		0	0	1	1	2	1	0.0555556		0	0	0	1	1	1	0.0555556		0	0	0		1	0	0		0	0	0	0	1	0.0555556
PED	0	0	0	1	0.0555556		0	0	1	1	2	1	0.0555556		1	0	1	0	0	0	0		0	0	0		1	0	0		1	0	0	1	0	0
PED	0	0	0	1	0.0555556		0	1	0	1	2	1	0.0555556		0	0	0	1	1	1	0.0555556		0	0	0		1	0	0		1	0	0	1	0	0
PED	0	0	0	1	0.0555556		0	0	0	1	1	1	0.0555556		0	0	0	1	1	1	0.0555556		1	1	0.0555556		1	0	0		1	0	0	1	0	0
PED	0	0	0	1	0.0555556		0	0	0	1	1	1	0.0555556		0	0	0	1	1	1	0.0555556		1	1	0.0555556		1	0	0		1	0	0	1	0	0
PED	0	0	0	1	0.0555556		0	0	0	1	1	1	0.0555556		0	0	0	1	1	1	0.0555556		1	1	0.0555556		1	0	0		1	0	0	1	0	0
PED	0	0	0	1	0.0555556		0	0	0	1	1	1	0.0555556		0	0	0	1	1	1	0.0555556		1	1	0.0555556		1	0	0		1	0	0	1	0	0
PED	1	0	1	0	0		0	0	1	1	2	1	0.0555556		0	0	0	1	1	1	0.0555556		0	0	0		1	0	0		0	0	0	0	1	0.0555556
PED	0	0	0	1	0.0555556		0	1	0	1	2	1	0.0555556		0	0	0	1	1	1	0.0555556		0	0	0		0	1	0.0555556		1	0	0	1	0	0
PED	0	0	0	1	0.0555556		1	0	0	1	2	1	0.0555556		0	0	0	1	1	1	0.0555556		0	0	0		1	0	0		0	0	0	0	1	0.0555556
PED	0	1	1	0	0		0	1	0	1	2	1	0.0555556		0	0	0	1	1	1	0.0555556		0	0	0		0	1	0.0555556		1	0	1	2	0	0
PED	0	1	1	0	0		0	1	0	1	2	1	0.0555556		0	0	0	1	1	1	0.0555556		0	0	0		0	1	0.0555556		0	0	1	1	0	0
PED	0	1	1	0	0		0	1	0	1	2	1	0.0555556		0	0	0	1	1	1	0.0555556		0	0	0		0	1	0.0555556		1	0	1	2	0	0
PED	0	1	1	0	0		0	1	0	1	2	1	0.0555556		0	0	0	1	1	1	0.0555556		0	0	0		0	1	0.0555556		0	0	1	1	0	0
PED	1	1	2	0	0		0	1	0	1	2	1	0.0555556		0	0	0	1	1	1	0.0555556		0	0	0		0	1	0.0555556		1	0	1	2	0	0
PED	1	1	2	0	0		0	1	0	1	2	1	0.0555556		0	0	0	1	1	1	0.0555556		0	0	0		0	1	0.0555556		1	0	1	2	0	0
PED	1	1	2	0	0		0	1	0	1	2	1	0.0555556		0	0	0	1	1	1	0.0555556		0	0	0		0	1	0.0555556		1	0	1	2	0	0
PED	0	1	1	0	0		0	1	0	1	2	1	0.0555556		0	0	0	1	1	1	0.0555556		0	0	0		0	1	0.0555556		1	0	1	2	0	0
PED	0	1	1	0	0		0	1	0	1	2	1	0.0555556		0	0	0	1	1	1	0.0555556		0	0	0		0	1	0.0555556		1	0	1	2	0	0
PED	0	1	1	0	0		0	1	0	1	2	1	0.0555556		0	0	0	1	1	1	0.0555556		0	0	0		0	1	0.0555556		0	0	0	0	1	0.0555556
PED	1	1	2	0	0		0	1	0	1	2	1	0.0555556		0	0	0	1	1	1	0.0555556		0	0	0		1	0	0		1	0	1	2	0	0
PED	1	1	2	0	0		0	1	0	1	2	1	0.0555556		0	0	0	1	1	1	0.0555556		0	0	0		1	0	0		1	0	1	2	0	0
PED	1	1	2	0	0		0	1	0	1	2	1	0.0555556		0	0	0	1	1	1	0.0555556		0	0	0		1	0	0		1	0	1	2	0	0
PED	1	1	2	0	0		0	1	0	1	2	1	0.0555556		0	0	0	1	1	1	0.0555556		0	0	0		1	0	0		1	0	1	2	0	0
PED	0	1	1	0	0		0	1	0	1	2	1	0.0555556		0	0	0	1	1	1	0.0555556		0	0	0		0	1	0.0555556		0	0	0	0	1	0.0555556
PED	0	1	1	0	0		0	1	0	1	2	1	0.0555556		0	0	0	1	1	1	0.0555556		0	0	0		0	1	0.0555556		0	0	0	0	1	0.0555556
PED	0	1	1	0	0		0	1	0	1	2	1	0.0555556		0	0	0	1	1	1	0.0555556		0	0	0		0	1	0.0555556		1	0	1	2	0	0
PED	0	1	1	0	0		0	1	0	1	2	1	0.0555556		0	0	0	1	1	1	0.0555556		0	0	0		0	1	0.0555556		1	0	1	2	0	0
PED	0	1	1	0	0		0	1	0	1	2	1	0.0555556		0	0	0	1	1	1	0.0555556		0	0	0		0	1	0.0555556		1	0	1	2	0	0
PED	0	1	1	0	0		0	1	0	1	2	1	0.0555556		0	0	0	1	1	1	0.0555556		0	0	0		0	1	0.0555556		0	0	1	1	0	0
PED	0	1	1	0	0		0	1	0	1	2	1	0.0555556		0	0	0	1	1	1	0.0555556		0	0	0		0	1	0.0555556		0	0	1	1	0	0
PED	0	1	1	0	0		0	1	0	1	2	1	0.0555556		0	0	0	1	1	1	0.0555556		0	0	0		0	1	0.0555556		0	0	1	1	0	0
PED	0	1	1	0	0		0	1	0	1	2	1	0.0555556		0	0	0	1	1	1	0.0555556		0	0	0		0	1	0.0555556		0	0	1	1	0	0
PED	0	1	1	0	0		0	1	0	1	2	1	0.0555556		0	0	0	1	1	1	0.0555556		0	0	0		0	1	0.0555556		0	0	0	0	1	0.0555556
PED	0	1	1	0	0		0	1	0	1	2	1	0.0555556		0	0	0	1	1	1	0.0555556		0	0	0		0	1	0.0555556		0	0	0	0	1	0.0555556
PED	0	1	1	0	0		0	1	0	1	2	1	0.0555556		0	0	0	1	1	1	0.0555556		0	0	0		0	1	0.0555556		0	0	1	1	0	0
PED	0	1	1	0	0		0	1	0	1	2	1	0.0555556		0	0	0	1	1	1	0.0555556		0	0	0		0	1	0.0555556		1	0	1	2	0	0
PED	0	1	1	0	0		0	1	0	1	2	1	0.0555556		0	0	0	1	1	1	0.0555556		0	0	0		0	1	0.0555556		1	0	1	2	0	0
PED	0	1	1	0	0		0	0	0	1	1	1	0.0555556		0	0	0	1	1	1	0.0555556		0	0	0		0	1	0.0555556		0	0	0	0	1	0.0555556
PED	0	1	1	0	0		0	0	0	1	1	1	0.0555556		0	0	0	1	1	1	0.0555556		0	0	0		0	1	0.0555556		0	0	0	0	1	0.0555556
PED	0	1	1	0	0		0	0	0	1	1	1	0.0555556		0	0	0	1	1	1	0.0555556		0	0	0		0	1	0.0555556		1	0	1	2	0	0
PED	0	1	1	0	0		0	0	0	1	1	1	0.0555556		0	0	0	1	1	1	0.0555556		0	0	0		0	1	0.0555556		0	0	1	1	0	0
PED	0	1	1	0	0		0	1	0	1	2	1	0.0555556		0	0	0	1	1	1	0.0555556		0	0	0		0	1	0.0555556		0	0	0	0	1	0.0555556
PED	0	1	1	0	0		0	1	0	1	2	1	0.0555556		0	0	0	1	1	1	0.0555556		0	0	0		0	1	0.0555556		1	0	0	1	0	0
PED	0	1	1	0	0		0	1	0	1	2	1	0.0555556		0	0	0	1	1	1	0.0555556		0	0	0		0	1	0.0555556		1	0	0	1	0	0
PED	0	1	1	0	0		0	1	0	1	2	1	0.0555556		0	0	0	1	1	1	0.0555556		0	0	0		0	1	0.0555556		0	0	1	1	0	0
PED	0	1	1	0	0		0	1	0	1	2	1	0.0555556		0	0	0	1	1	1	0.0555556		0	0	0		0	1	0.0555556		1	0	1	2	0	0
PED	0	1	1	0	0		0	1	0	1	2	1	0.0555556		0	0	0	1	1	1	0.0555556		0	0	0		0	1	0.0555556		1	0	1	2	0	0
TUC	1	1	2	0	0		0	1	0	1	2	1	0.0555556		0	0	0	1	1	1	0.0555556		0	0	0		0	1	0.0555556		1	0	1	2	0	0
TUC	1	1	2	0	0		0	1	0	1	2	1	0.0555556		0	0	0	1	1	1	0.0555556		0	0	0		0	1	0.0555556		1	0	1	2	0	0
TUC	0	1	1	0	0		0	1	0	1	2	1	0.0555556		0	0	0	1	1	1	0.0555556		0	0	0		0	1	0.0555556		0	0	1	1	0	0
TUC	0	1	1	0	0		0	1	0	1	2	1	0.0555556		0	0	0	1	1	1	0.0555556		0	0	0		0	1	0.0555556		0	0	1	1	0	0
TUC	0	1	1	0	0		0	1	0	1	2	1	0.0555556		0	0	0	1	1	1	0.0555556		0	0	0		0	1	0.0555556		1	0	0	1	0	0
TUC	0	1	1	0	0		0	1	0	1	2	1	0.0555556		0	0	0	1	1	1	0.0555556		0	0	0		0	1	0.0555556		1	0	0	1	0	0
TUC	0	1	1	0	0		0	1	0	1	2	1	0.0555556		0	0	0	1	1	1	0.0555556		0	0	0		0	1	0.0555556		1	0	0	1	0	0
TUC	0	1	1	0	0		0	1	0	1	2	1	0.0555556		0	0	0	1	1	1	0.0555556		0	0	0		0	1	0.0555556		1	0	0	1	0	0
TUC	1	1	2	0	0		0	1	0	1	2	1	0.0555556		0	0	0	1	1	1	0.0555556		0	0	0		0	1	0.0555556		1	0	1	2	0	0
TUC	1	1	2	0	0		0	1	0	1	2	1	0.0555556		0	0	0	1	1	1	0.0555556		0	0	0		0	1	0.0555556		1	0	1	2	0	0
TUC	0	1	1	0	0		0	1	0	1	2	1	0.0555556		0	0	0	1	1	1	0.0555556		0	0	0		0	1	0.0555556		1	0	0	1	0	0
TUC	1	1	2	0	0		0	1	0	1	2	1	0.0555556		0	0	0	1	1	1	0.0555556		0	0	0		0	1	0.0555556		1	0	1	2	0	0
TUC	0	1	1	0	0		0	1	0	1	2	1	0.0555556		0	0	0	1	1	1	0.0555556		0	0	0		0	1	0.0555556		1	0	0	1	0	0
TUC	0	1	1	0	0		0	1	0	1	2	1	0.0555556		0	0	0	1	1	1	0.0555556		0	0	0		0	1	0.0555556		0	0	1	1	0	0
TUC	1	1	2	0	0		0	1	0	1	2	1	0.0555556		0	0	0	1	1	1	0.0555556		0	0	0		1	0	0		0	0	1	1	0	0
TUC	1	1	2	0	0		0	1	0	1	2	1	0.0555556		0	0	0	1	1	1	0.0555556		0	0	0		0	1	0.0555556		1	0	1	2	0	0
TUC	0	1	1	0	0		0	1	0	1	2	1	0.0555556		0	0	0	1	1	1	0.0555556		0	0	0		0	1	0.0555556		1	0	0	1	0	0
TUC	0	1	1	0	0		0	1	0	1	2	1	0.0555556		0	0	0	1	1	1	0.0555556		0	0	0		0	1	0.0555556		0	0	0	0	1	0.0555556
TUC	0	1	1	0	0		0	1	0	1	2	1	0.0555556		0	0	0	1	1	1	0.0555556		0	0	0		0	1	0.0555556		0	0	1	1	0	0
TUC	0	1	1	0	0		0	1	0	1	2	1	0.0555556		0	0	0	1	1	1	0.0555556		0	0	0		0	1	0.0555556		0	0	1	1	0	0
TUC	0	1	1	0	0		0	1	0	1	2	1	0.0555556		0	0	0	1	1	1	0.0555556		0	0	0		0	1	0.0555556		0	0	1	1	0	0
TUC	0	1	1	0	0		0	1	0	1	2	1	0.0555556		0	0	0	1	1	1	0.0555556		0	0	0		0	1	0.0555556		0	0	1	1	0	0
TUC	0	1	1	0	0		0	1	0	1	2	1	0.0555556		0	0	0	1	1	1	0.0555556		0	0	0		0	1	0.0555556		0	0	1	1	0	0
TUC	0	1	1	0	0		0	1	0	1	2	1	0.0555556		0	0	0	1	1	1	0.0555556		0	0	0		0	1	0.0555556		1	0	0	1	0	0
TUC	0	1	1	0	0		0	1	0	1	2	1	0.0555556		0	0	0	1	1	1	0.0555556		0	0	0		0	1	0.0555556		1	0	0	1	0	0
TUC	0	1	1	0	0		0	1	0	1	2	1	0.0555556		0	0	0	1	1	1	0.0555556		0	0	0		0	1	0.0555556		0	0	1	1	0	0
TUC	0	1	1	0	0		0	1	0	1	2	1	0.0555556		0	0	0	1	1	1	0.0555556		0	0	0		0	1	0.0555556		1	0	0	1	0	0
TUC	0	0	0	1	0.0555556		0	1	0	1	2	1	0.0555556		0	0	0	1	1	1	0.0555556		0	0	0		0	1	0.0555556		1	0	1	2	0	0
TUC	1	0	1	0	0		0	1	0	1	2	1	0.0555556		0	0	0	1	1	1	0.0555556		0	0	0		0	1	0.0555556		1	0	1	2	0	0
TUC	1	0	1	0	0		0	1	0	1	2	1	0.0555556		0	0	0	1	1	1	0.0555556		0	0	0		0	1	0.0555556		1	0	1	2	0	0
TUC	1	0	1	0	0		0	1	0	1	2	1	0.0555556		0	0	0	1	1	1	0.0555556		0	0	0		0	1	0.0555556		1	0	1	2	0	0
TUC	1	0	1	0	0		0	1	0	1	2	1	0.0555556		0	0	0	1	1	1	0.0555556		0	0	0		0	1	0.0555556		1	0	1	2	0	0
TUC	1	0	1	0	0		0	1	0	1	2	1	0.0555556		0	0	0	1	1	1	0.0555556		0	0	0		0	1	0.0555556		1	0	1	2	0	0
TUC	1	0	1	0	0		0	1	0	1	2	1	0.0555556		0	0	0	1	1	1	0.0555556		0	0	0		0	1	0.0555556		1	0	1	2	0	0
TUC	1	0	1	0	0		0	1	0	1	2	1	0.0555556		0	0	0	1	1	1	0.0555556		0	0	0		0	1	0.0555556		1	0	1	2	0	0
TUC	0	0	0	1	0.0555556		0	1	0	1	2	1	0.0555556		0	0	0	1	1	1	0.0555556		0	0	0		0	1	0.0555556		1	0	0	1	0	0
TUC	0	0	0	1	0.0555556		0	1	0	1	2	1	0.0555556		0	0	0	1	1	1	0.0555556		0	0	0		0	1	0.0555556		1	0	0	1	0	0
TUC	0	0	0	1	0.0555556		0	1	0	1	2	1	0.0555556		0	0	0	1	1	1	0.0555556		0	0	0		0	1	0.0555556		1	0	0	1	0	0
TUC	0	0	0	1	0.0555556		0	1	0	1	2	1	0.0555556		0	0	0	1	1	1	0.0555556		0	0	0		0	1	0.0555556		1	0	0	1	0	0
TUC	1	0	1	0	0		0	1	0	1	2	1	0.0555556		0	0	0	1	1	1	0.0555556		0	0	0		0	1	0.0555556		1	0	1	2	0	0
TUC	1	0	1	0	0		0	1	0	1	2	1	0.0555556		0	0	0	1	1	1	0.0555556		0	0	0		0	1	0.0555556		1	0	1	2	0	0
TUC	1	0	1	0	0		0	1	0	1	2	1	0.0555556		0	0	0	1	1	1	0.0555556		0	0	0		0	1	0.0555556		1	0	1	2	0	0
TUC	0	0	0	1	0.0555556		0	1	0	1	2	1	0.0555556		0	0	0	1	1	1	0.0555556		0	0	0		0	1	0.0555556		1	0	0	1	0	0
TUC	0	0	0	1	0.0555556		0	1	0	1	2	1	0.0555556		0	0	0	1	1	1	0.0555556		0	0	0		0	1	0.0555556		1	0	0	1	0	0
TUC	0	0	0	1	0.0555556		0	1	0	1	2	1	0.0555556		0	0	0	1	1	1	0.0555556		0	0	0		0	1	0.0555556		1	0	0	1	0	0
TUC	0	0	0	1	0.0555556		0	1	0	1	2	1	0.0555556		0	0	0	1	1	1	0.0555556		0	0	0		0	1	0.0555556		0	0	0	0	1	0.0555556
TUC	0	0	0	1	0.0555556		0	1	0	1	2	1	0.0555556		0	0	0	1	1	1	0.0555556		0	0	0		0	1	0.0555556		0	0	0	0	1	0.0555556
TUC	1	0	1	0	0		0	1	0	1	2	1	0.0555556		0	0	0	1	1	1	0.0555556		0	0	0		0	1	0.0555556		1	0	1	2	0	0
TUC	1	0	1	0	0		0	1	0	1	2	1	0.0555556		0	0	0	1	1	1	0.0555556		0	0	0		0	1	0.0555556		1	0	1	2	0	0
TUC	1	0	1	0	0		0	1	0	1	2	1	0.0555556		0	0	0	1	1	1	0.0555556		0	0	0		0	1	0.0555556		1	0	0	1	0	0
TUC	1	0	1	0	0		0	1	0	1	2	1	0.0555556		0	0	0	1	1	1	0.0555556		0	0	0		0	1	0.0555556		1	0	0	1	0	0
TUC	1	0	1	0	0		0	1	0	1	2	1	0.0555556		0	0	0	1	1	1	0.0555556		0	0	0		0	1	0.0555556		1	0	0	1	0	0
TUC	1	0	1	0	0		0	1	0	1	2	1	0.0555556		0	1	1	0	1	1	0.0555556		0	0	0		1	0	0		0	0	0	0	1	0.0555556
TUC	1	0	1	0	0		0	1	0	1	2	1	0.0555556		0	1	1	0	1	1	0.0555556		0	0	0		1	0	0		0	0	0	0	1	0.0555556
TUC	1	0	1	0	0		0	1	0	1	2	1	0.0555556		0	1	1	0	1	1	0.0555556		0	0	0		1	0	0		0	0	0	0	1	0.0555556
TUC	1	0	1	0	0		0	1	0	1	2	1	0.0555556		0	1	1	0	1	1	0.0555556		0	0	0		1	0	0		0	0	0	0	1	0.0555556
TUC	1	0	1	0	0		0	1	0	1	2	1	0.0555556		0	1	1	0	1	1	0.0555556		0	0	0		0	1	0.0555556		0	0	1	1	0	0
TUC	0	0	0	1	0.0555556		0	1	0	1	2	1	0.0555556		0	1	1	0	1	1	0.0555556		0	0	0		0	1	0.0555556		0	0	0	0	1	0.0555556
TUC	1	0	1	0	0		0	1	0	1	2	1	0.0555556		0	1	1	0	1	1	0.0555556		0	0	0		0	1	0.0555556		0	0	0	0	1	0.0555556
TUC	0	0	0	1	0.0555556		0	0	0	1	1	1	0.0555556		0	0	0	1	1	1	0.0555556		0	0	0		1	0	0		1	0	1	2	0	0
TUC	0	0	0	1	0.0555556		0	0	0	1	1	1	0.0555556		0	0	0	1	1	1	0.0555556		0	0	0		1	0	0		1	0	1	2	0	0
TUC	0	0	0	1	0.0555556		0	0	0	1	1	1	0.0555556		0	0	0	1	1	1	0.0555556		0	0	0		1	0	0		0	0	0	0	1	0.0555556
TUC	0	0	0	1	0.0555556		0	0	0	1	1	1	0.0555556		0	0	0	1	1	1	0.0555556		0	0	0		1	0	0		0	0	0	0	1	0.0555556
TUC	0	0	0	1	0.0555556		0	0	0	1	1	1	0.0555556		0	0	0	1	1	1	0.0555556		0	0	0		0	1	0.0555556		0	0	0	0	1	0.0555556
TUC	0	0	0	1	0.0555556		0	0	0	1	1	1	0.0555556		0	0	0	1	1	1	0.0555556		0	0	0		1	0	0		0	0	0	0	1	0.0555556
TUC	0	0	0	1	0.0555556		0	0	0	1	1	1	0.0555556		0	0	0	1	1	1	0.0555556		0	0	0		0	1	0.0555556		0	0	0	0	1	0.0555556
TUC	0	0	0	1	0.0555556		0	0	0	1	1	1	0.0555556		0	0	0	1	1	1	0.0555556		0	0	0		1	0	0		0	0	0	0	1	0.0555556
TUC	0	0	0	1	0.0555556		0	0	0	1	1	1	0.0555556		0	0	0	1	1	1	0.0555556		0	0	0		1	0	0		0	0	0	0	1	0.0555556
TUC	1	0	1	0	0		0	1	0	1	2	1	0.0555556		0	1	1	0	1	1	0.0555556		0	0	0		1	0	0		0	0	0	0	1	0.0555556
TUC	0	0	0	1	0.0555556		0	1	0	1	2	1	0.0555556		0	1	1	0	0	0	0		1	1	0.0555556		0	1	0.0555556		0	0	0	0	1	0.0555556
TUC	0	0	0	1	0.0555556		0	1	0	1	2	1	0.0555556		0	1	1	0	0	0	0		1	1	0.0555556		0	1	0.0555556		0	0	0	0	1	0.0555556
TUC	0	0	0	1	0.0555556		0	1	0	1	2	1	0.0555556		0	1	1	0	0	0	0		1	1	0.0555556		0	1	0.0555556		0	0	0	0	1	0.0555556
TUC	0	0	0	1	0.0555556		0	1	0	1	2	1	0.0555556		0	1	1	0	0	0	0		1	1	0.0555556		0	1	0.0555556		0	1	0	1	0	0
TUC	0	0	0	1	0.0555556		0	1	0	1	2	1	0.0555556		0	1	1	0	0	0	0		1	1	0.0555556		0	1	0.0555556		0	0	0	0	1	0.0555556
TUC	0	0	0	1	0.0555556		0	1	0	1	2	1	0.0555556		0	1	1	0	0	0	0		0	0	0		0	1	0.0555556		0	0	0	0	1	0.0555556
TUC	0	0	0	1	0.0555556		0	1	0	1	2	1	0.0555556		0	1	1	0	0	0	0		0	0	0		0	1	0.0555556		0	0	0	0	1	0.0555556
TUC	0	0	0	1	0.0555556		0	1	0	1	2	1	0.0555556		0	1	1	0	0	0	0		1	1	0.0555556		0	1	0.0555556		0	0	0	0	1	0.0555556
TUC	0	0	0	1	0.0555556		0	1	0	1	2	1	0.0555556		0	1	1	0	0	0	0		1	1	0.0555556		0	1	0.0555556		0	0	0	0	1	0.0555556
TUC	0	0	0	1	0.0555556		0	1	0	1	2	1	0.0555556		0	1	1	0	0	0	0		1	1	0.0555556		1	0	0		1	0	1	2	0	0
TUC	0	0	0	1	0.0555556		0	1	0	1	2	1	0.0555556		0	1	1	0	0	0	0		1	1	0.0555556		0	1	0.0555556		1	0	1	2	0	0
TUC	0	0	0	1	0.0555556		0	1	0	1	2	1	0.0555556		0	1	1	0	0	0	0		1	1	0.0555556		0	1	0.0555556		0	0	0	0	1	0.0555556
TUC	0	0	0	1	0.0555556		0	1	0	1	2	1	0.0555556		0	1	1	0	0	0	0		0	0	0		0	1	0.0555556		1	0	1	2	0	0
TUC	0	0	0	1	0.0555556		0	1	0	1	2	1	0.0555556		0	1	1	0	0	0	0		0	0	0		0	1	0.0555556		0	0	0	0	1	0.0555556
TUC	0	0	0	1	0.0555556		0	1	0	1	2	1	0.0555556		0	1	1	0	0	0	0		0	0	0		1	0	0		0	0	0	0	1	0.0555556
TUC	0	0	0	1	0.0555556		0	1	0	1	2	1	0.0555556		0	1	1	0	0	0	0		1	1	0.0555556		0	1	0.0555556		0	0	0	0	1	0.0555556
TUC	0	0	0	1	0.0555556		0	1	0	1	2	1	0.0555556		0	1	1	0	0	0	0		1	1	0.0555556		0	1	0.0555556		0	0	0	0	1	0.0555556
TUC	0	0	0	1	0.0555556		0	1	0	1	2	1	0.0555556		0	1	1	0	0	0	0		1	1	0.0555556		0	1	0.0555556		0	0	0	0	1	0.0555556
TUC	0	0	0	1	0.0555556		0	1	0	1	2	1	0.0555556		0	1	1	0	0	0	0		1	1	0.0555556		0	1	0.0555556		0	0	0	0	1	0.0555556
TUC	0	0	0	1	0.0555556		0	1	0	1	2	1	0.0555556		0	1	1	0	0	0	0		1	1	0.0555556		1	0	0		0	0	0	0	1	0.0555556
TUC	0	0	0	1	0.0555556		0	1	0	1	2	1	0.0555556		0	1	1	0	0	0	0		1	1	0.0555556		0	1	0.0555556		0	0	0	0	1	0.0555556
TUC	0	0	0	1	0.0555556		0	1	0	1	2	1	0.0555556		0	0	0	1	1	1	0.0555556		0	0	0		0	1	0.0555556		0	0	0	0	1	0.0555556
AD	1	1	2	0	0		0	1	0	1	2	1	0.0555556		0	0	0	1	1	1	0.0555556		0	0	0		0	1	0.0555556				0	0	1	0.0555556
AD	1	1	2	0	0		0	1	0	1	2	1	0.0555556		0	0	0	1	1	1	0.0555556		0	0	0		0	1	0.0555556				0	0	1	0.0555556
AD	0	1	1	0	0		0	1	0	1	2	1	0.0555556		0	0	0	1	1	1	0.0555556		0	0	0		0	1	0.0555556		1	0	1	2	0	0
AD	0	1	1	0	0		0	1	0	1	2	1	0.0555556		0	0	0	1	1	1	0.0555556		0	0	0		0	1	0.0555556		1	0	1	2	0	0
AD	1	1	2	0	0		0	1	0	1	2	1	0.0555556		0	0	0	1	1	1	0.0555556		0	0	0		0	1	0.0555556		0	0	1	1	0	0
AD	0	1	1	0	0		0	1	0	1	2	1	0.0555556		0	0	0	1	1	1	0.0555556		0	0	0		0	1	0.0555556		0	0	1	1	0	0
AD	0	1	1	0	0		0	1	0	1	2	1	0.0555556		0	0	0	1	0	1	0.0555556		0	0	0		0	1	0.0555556		0	0	1	1	0	0
AD	0	1	1	0	0		0	1	0	1	2	1	0.0555556		0	0	0	1	1	1	0.0555556		0	0	0		0	1	0.0555556		0	0	1	1	0	0
AD	0	1	1	0	0		0	1	0	1	2	1	0.0555556		0	0	0	1	1	1	0.0555556		0	0	0		0	1	0.0555556		1	0	0	1	0	0
AD	0	1	1	0	0		0	1	0	1	2	1	0.0555556		0	0	0	1	1	1	0.0555556		0	0	0		0	1	0.0555556		0	0	1	1	0	0
AD	0	1	1	0	0		0	1	0	1	2	1	0.0555556		0	0	0	1	1	1	0.0555556		0	0	0		0	1	0.0555556		1	0	1	2	0	0
AD	0	1	1	0	0		0	1	0	1	2	1	0.0555556		0	0	0	1	1	1	0.0555556		0	0	0		0	1	0.0555556		0	0	0	0	1	0.0555556
AD	0	1	1	0	0		0	1	0	1	2	1	0.0555556		0	0	0	1	1	1	0.0555556		0	0	0		0	1	0.0555556		0	0	1	1	0	0
AD	0	1	1	0	0		0	1	0	1	2	1	0.0555556		0	0	0	1	1	1	0.0555556		0	0	0		0	1	0.0555556		0	0	1	1	0	0
AD	0	1	1	0	0		0	1	0	1	2	1	0.0555556		0	0	0	1	1	1	0.0555556		0	0	0		0	1	0.0555556		1	0	1	2	0	0
AD	0	1	1	0	0		0	1	0	1	2	1	0.0555556		0	0	0	1	1	1	0.0555556		0	0	0		0	1	0.0555556		1	0	1	2	0	0
AD	0	1	1	0	0		0	1	0	1	2	1	0.0555556		0	0	0	1	1	1	0.0555556		0	0	0		0	1	0.0555556		0	0	1	1	0	0
AD	0	1	1	0	0		0	1	0	1	2	1	0.0555556		0	0	0	1	1	1	0.0555556		0	0	0		0	1	0.0555556		0	0	1	1	0	0
AD	0	1	1	0	0		0	1	0	1	2	1	0.0555556		0	0	0	1	1	1	0.0555556		0	0	0		0	1	0.0555556		0	0	1	1	0	0
AD	0	1	1	0	0		0	1	0	1	2	1	0.0555556		0	0	0	1	1	1	0.0555556		0	0	0		0	1	0.0555556		0	0	1	1	0	0
AD	0	1	1	0	0		0	1	0	1	2	1	0.0555556		0	0	0	1	1	1	0.0555556		0	0	0		0	1	0.0555556		0	0	1	1	0	0
AD	1	1	2	0	0		0	1	0	1	2	1	0.0555556		0	0	0	1	1	1	0.0555556		0	0	0		0	1	0.0555556		0	0	1	1	0	0
AD	1	1	2	0	0		0	1	0	1	2	1	0.0555556		0	0	0	1	1	1	0.0555556		0	0	0		0	1	0.0555556		1	0	1	2	0	0
AD	1	1	2	0	0		0	1	0	1	2	1	0.0555556		0	0	0	1	1	1	0.0555556		0	0	0		0	1	0.0555556		1	0	1	2	0	0
AD	1	1	2	0	0		0	1	0	1	2	1	0.0555556		0	0	0	1	1	1	0.0555556		0	0	0		0	1	0.0555556		1	0	1	2	0	0
AD	0	0	0	1	0.0555556		0	1	0	1	2	1	0.0555556		0	0	0	1	1	1	0.0555556		0	0	0		0	1	0.0555556		0	0	1	1	0	0
AD	0	0	0	1	0.0555556		0	1	0	1	2	1	0.0555556		0	0	0	1	1	1	0.0555556		0	0	0		0	1	0.0555556		0	0	1	1	0	0
AD	0	0	0	1	0.0555556		0	0	1	1	2	1	0.0555556		0	0	0	1	1	1	0.0555556		0	0	0		1	0	0		0	0	0	0	1	0.0555556
AD	0	1	1	0	0		0	1	0	1	2	1	0.0555556		0	0	0	1	0	1	0.0555556		0	0	0		0	1	0.0555556		0	0	1	1	0	0
AD	0	1	1	0	0		0	1	0	1	2	1	0.0555556		0	0	0	1	1	1	0.0555556		0	0	0		0	1	0.0555556		0	1	1	2	0	0
AD	0	1	1	0	0		0	1	0	1	2	1	0.0555556		0	0	0	1	1	1	0.0555556		0	0	0		0	1	0.0555556		0	0	1	1	0	0
AD	0	1	1	0	0		0	1	0	1	2	1	0.0555556		0	0	0	1	1	1	0.0555556		0	0	0		0	1	0.0555556		1	0	1	2	0	0
AD	0	1	1	0	0		0	1	0	1	2	1	0.0555556		0	0	0	1	1	1	0.0555556		0	0	0		0	1	0.0555556		1	0	1	2	0	0
AD	1	1	2	0	0		0	1	0	1	2	1	0.0555556		0	0	0	1	1	1	0.0555556		0	0	0		0	1	0.0555556		1	0	1	2	0	0
AD	0	1	1	0	0		0	1	0	1	2	1	0.0555556		0	0	0	1	1	1	0.0555556		0	0	0		0	1	0.0555556		1	0	1	2	0	0
AD	0	1	1	0	0		0	1	0	1	2	1	0.0555556		0	0	0	1	1	1	0.0555556		0	0	0		0	1	0.0555556		0	0	1	1	0	0
AD	1	1	2	0	0		0	1	0	1	2	1	0.0555556		0	0	0	1	1	1	0.0555556		0	0	0		0	1	0.0555556		1	0	1	2	0	0
AD	0	1	1	0	0		0	1	0	1	2	1	0.0555556		0	0	0	1	1	1	0.0555556		0	0	0		0	1	0.0555556		0	0	1	1	0	0
AD	0	1	1	0	0		0	1	0	1	2	1	0.0555556		0	0	0	1	1	1	0.0555556		0	0	0		0	1	0.0555556		0	0	1	1	0	0
AD	0	1	1	0	0		0	1	0	1	2	1	0.0555556		0	0	0	1	1	1	0.0555556		0	0	0		0	1	0.0555556		0	0	1	1	0	0
AD	0	1	1	0	0		0	1	0	1	2	1	0.0555556		0	0	0	1	1	1	0.0555556		0	0	0		0	1	0.0555556		0	0	1	1	0	0
AD	0	1	1	0	0		0	1	0	1	2	1	0.0555556		0	0	0	1	1	1	0.0555556		0	0	0		0	1	0.0555556		0	0	1	1	0	0
AD	0	1	1	0	0		0	1	0	1	2	1	0.0555556		0	0	0	1	1	1	0.0555556		0	0	0		0	1	0.0555556		0	0	1	1	0	0
AD	0	1	1	0	0		0	1	0	1	2	1	0.0555556		0	0	0	1	1	1	0.0555556		0	0	0		0	1	0.0555556		0	0	0	0	1	0.0555556
AD	0	1	1	0	0		0	1	0	1	2	1	0.0555556		0	0	0	1	1	1	0.0555556		0	0	0		0	1	0.0555556		0	0	1	1	0	0
AD	0	1	1	0	0		0	1	0	1	2	1	0.0555556		0	0	0	1	1	1	0.0555556		0	0	0		0	1	0.0555556		0	0	0	0	1	0.0555556
AD	0	1	1	0	0		0	1	0	1	2	1	0.0555556		0	0	0	1	1	1	0.0555556		0	0	0		0	1	0.0555556		0	0	1	1	0	0
AD	0	1	1	0	0		0	1	0	1	2	1	0.0555556		0	0	0	1	1	1	0.0555556		0	0	0		0	1	0.0555556		0	0	1	1	0	0
AD	0	1	1	0	0		0	1	0	1	2	1	0.0555556		0	0	0	1	1	1	0.0555556		0	0	0		0	1	0.0555556		0	0	1	1	0	0
AD	0	1	1	0	0		0	1	0	1	2	1	0.0555556		0	0	0	1	1	1	0.0555556		0	0	0		0	1	0.0555556		0	0	1	1	0	0
AD	0	1	1	0	0		0	1	0	1	2	1	0.0555556		0	0	0	1	1	1	0.0555556		0	0	0		0	1	0.0555556		0	0	1	1	0	0
AD	0	1	1	0	0		0	1	0	1	2	1	0.0555556		0	0	0	1	1	1	0.0555556		0	0	0		0	1	0.0555556		0	0	1	1	0	0
AD	0	1	1	0	0		0	1	0	1	2	1	0.0555556		0	0	0	1	1	1	0.0555556		0	0	0		0	1	0.0555556		1	0	1	2	0	0
AD	0	1	1	0	0		0	1	0	1	2	1	0.0555556		0	0	0	1	1	1	0.0555556		0	0	0		0	1	0.0555556		1	0	1	2	0	0
AD	0	1	1	0	0		0	1	0	1	2	1	0.0555556		0	0	0	1	1	1	0.0555556		0	0	0		0	1	0.0555556		1	0	1	2	0	0
AD	0	1	1	0	0		0	1	0	1	2	1	0.0555556		0	0	0	1	1	1	0.0555556		0	0	0		0	1	0.0555556		1	0	1	2	0	0
AD	0	1	1	0	0		0	1	0	1	2	1	0.0555556		0	0	0	1	1	1	0.0555556		0	0	0		0	1	0.0555556		0	0	1	1	0	0
AD	0	1	1	0	0		0	1	0	1	2	1	0.0555556		0	0	0	1	1	1	0.0555556		0	0	0		0	1	0.0555556		0	0	1	1	0	0
AD	0	1	1	0	0		0	1	0	1	2	1	0.0555556		0	0	0	1	1	1	0.0555556		0	0	0		0	1	0.0555556		0	0	1	1	0	0
AD	0	1	1	0	0		0	1	0	1	2	1	0.0555556		0	0	0	1	1	1	0.0555556		0	0	0		0	1	0.0555556		1	0	1	2	0	0
AD	0	1	1	0	0		0	1	0	1	2	1	0.0555556		0	1	1	0	0	0	0		0	0	0		0	1	0.0555556		0	0	1	1	0	0
AD	0	1	1	0	0		0	1	0	1	2	1	0.0555556		0	0	0	1	1	1	0.0555556		0	0	0		0	1	0.0555556		0	0	1	1	0	0
AD	0	1	1	0	0		0	1	0	1	2	1	0.0555556		0	1	1	0	0	0	0		0	0	0		0	1	0.0555556		0	0	1	1	0	0
AD	0	1	1	0	0		0	1	0	1	2	1	0.0555556		0	1	1	0	0	0	0		0	0	0		0	1	0.0555556		0	0	1	1	0	0
AD	0	1	1	0	0		0	1	0	1	2	1	0.0555556		0	0	0	1	1	1	0.0555556		0	0	0		0	1	0.0555556		0	0	1	1	0	0
AD	0	1	1	0	0		0	1	0	1	2	1	0.0555556		0	0	0	1	1	1	0.0555556		0	0	0		0	1	0.0555556		0	0	1	1	0	0
AD	0	1	1	0	0		0	1	0	1	2	1	0.0555556		0	0	0	1	1	1	0.0555556		0	0	0		0	1	0.0555556		1	0	1	2	0	0
AD	0	1	1	0	0		0	1	0	1	2	1	0.0555556		0	0	0	1	1	1	0.0555556		0	0	0		0	1	0.0555556		1	0	1	2	0	0
AD	0	1	1	0	0		0	1	0	1	2	1	0.0555556		0	0	0	1	1	1	0.0555556		0	0	0		0	1	0.0555556		0	0	0	0	1	0.0555556
AD	0	1	1	0	0		0	1	0	1	2	1	0.0555556		0	0	0	1	1	1	0.0555556		0	0	0		0	1	0.0555556		0	0	0	0	1	0.0555556
AD	1	1	2	0	0		0	1	0	1	2	1	0.0555556		0	0	0	1	1	1	0.0555556		0	0	0		0	1	0.0555556		0	0	1	1	0	0
AD	1	1	2	0	0		0	1	0	1	2	1	0.0555556		0	0	0	1	1	1	0.0555556		0	0	0		0	1	0.0555556		0	0	1	1	0	0
AD	0	1	1	0	0		0	1	0	1	2	1	0.0555556		0	0	0	1	1	1	0.0555556		0	0	0		0	1	0.0555556		0	0	1	1	0	0
AD	0	1	1	0	0		0	1	0	1	2	1	0.0555556		0	1	1	0	1	1	0.0555556		0	0	0		0	1	0.0555556		0	0	1	1	0	0
AD	0	1	1	0	0		0	1	0	1	2	1	0.0555556		0	1	1	0	1	1	0.0555556		0	0	0		0	1	0.0555556		0	0	1	1	0	0
AD	0	1	1	0	0		0	1	0	1	2	1	0.0555556		0	1	1	0	1	1	0.0555556		0	0	0		0	1	0.0555556		0	0	1	1	0	0
AD	0	1	1	0	0		0	1	0	1	2	1	0.0555556		0	1	1	0	0	0	0		0	0	0		0	1	0.0555556		0	0	1	1	0	0
AD	0	1	1	0	0		0	1	0	1	2	1	0.0555556		0	1	1	0	1	1	0.0555556		0	0	0		0	1	0.0555556		1	0	1	2	0	0
AD	1	1	2	0	0		0	1	0	1	2	1	0.0555556		0	0	0	1	1	1	0.0555556		0	0	0		0	1	0.0555556		0	0	1	1	0	0
AD	1	1	2	0	0		0	1	0	1	2	1	0.0555556		0	0	0	1	1	1	0.0555556		0	0	0		0	1	0.0555556		0	0	1	1	0	0
AD	0	1	1	0	0		0	1	0	1	2	1	0.0555556		0	0	0	1	1	1	0.0555556		0	0	0		0	1	0.0555556		0	0	1	1	0	0
AD	0	1	1	0	0		0	1	0	1	2	1	0.0555556		0	0	0	1	0	1	0.0555556		0	0	0		0	1	0.0555556		0	0	1	1	0	0
AD	1	1	2	0	0		0	1	0	1	2	1	0.0555556		0	0	0	1	1	1	0.0555556		0	0	0		0	1	0.0555556		0	0	1	1	0	0
AD	0	1	1	0	0		0	1	0	1	2	1	0.0555556		0	0	0	1	1	1	0.0555556		0	0	0		0	1	0.0555556		0	0	1	1	0	0
AD	0	1	1	0	0		0	1	0	1	2	1	0.0555556		0	0	0	1	1	1	0.0555556		0	0	0		0	1	0.0555556		0	0	1	1	0	0
AD	0	1	1	0	0		0	1	0	1	2	1	0.0555556		0	0	0	1	1	1	0.0555556		0	0	0		0	1	0.0555556		0	0	1	1	0	0
AD	0	1	1	0	0		0	1	0	1	2	1	0.0555556		0	0	0	1	1	1	0.0555556		0	0	0		0	1	0.0555556		0	0	1	1	0	0
AD	0	1	1	0	0		0	1	0	1	2	1	0.0555556		0	0	0	1	1	1	0.0555556		0	0	0		0	1	0.0555556		0	0	1	1	0	0
AD	0	1	1	0	0		0	1	0	1	2	1	0.0555556		0	0	0	1	1	1	0.0555556		0	0	0		0	1	0.0555556		0	0	0	0	1	0.0555556
AD	0	1	1	0	0		0	1	0	1	2	1	0.0555556		0	0	0	1	0	1	0.0555556		0	0	0		0	1	0.0555556		1	0	1	2	0	0
AD	0	1	1	0	0		0	1	0	1	2	1	0.0555556		0	0	0	1	0	1	0.0555556		0	0	0		0	1	0.0555556		1	0	1	2	0	0
AD	0	1	1	0	0		0	1	0	1	2	1	0.0555556		0	0	0	1	0	1	0.0555556		0	0	0		0	1	0.0555556		1	0	1	2	0	0
AD	0	1	1	0	0		0	1	0	1	2	1	0.0555556		0	0	0	1	1	1	0.0555556		0	0	0		0	1	0.0555556		0	0	1	1	0	0
AD	0	1	1	0	0		0	1	0	1	2	1	0.0555556		0	0	0	1	1	1	0.0555556		0	0	0		0	1	0.0555556		0	0	1	1	0	0
AD	0	1	1	0	0		0	1	0	1	2	1	0.0555556		0	0	0	1	1	1	0.0555556		0	0	0		0	1	0.0555556		1	0	1	2	0	0
AD	0	1	1	0	0		0	1	0	1	2	1	0.0555556		0	0	0	1	1	1	0.0555556		0	0	0		1	0	0		1	0	1	2	0	0
AD	0	1	1	0	0		0	1	0	1	2	1	0.0555556		0	0	0	1	1	1	0.0555556		0	0	0		0	1	0.0555556		0	0	1	1	0	0
AD	0	1	1	0	0		0	1	0	1	2	1	0.0555556		0	0	0	1	1	1	0.0555556		0	0	0		0	1	0.0555556		0	0	1	1	0	0
AD	0	1	1	0	0		0	1	0	1	2	1	0.0555556		0	0	0	1	1	1	0.0555556		0	0	0		0	1	0.0555556		0	0	1	1	0	0
AD	0	1	1	0	0		0	1	0	1	2	1	0.0555556		0	0	0	1	1	1	0.0555556		0	0	0		0	1	0.0555556		0	0	1	1	0	0
AD	0	1	1	0	0		0	1	0	1	2	1	0.0555556		0	0	0	1	1	1	0.0555556		0	0	0		0	1	0.0555556		0	0	1	1	0	0
AD	0	1	1	0	0		0	1	0	1	2	1	0.0555556		0	0	0	1	1	1	0.0555556		0	0	0		0	1	0.0555556		0	0	1	1	0	0
AD	0	1	1	0	0		0	1	0	1	2	1	0.0555556		0	0	0	1	1	1	0.0555556		0	0	0		0	1	0.0555556		0	0	1	1	0	0
AD	1	1	2	0	0		0	1	0	1	2	1	0.0555556		0	0	0	1	1	1	0.0555556		0	0	0		0	1	0.0555556		1	0	0	1	0	0
AD	0	1	1	0	0		0	1	0	1	2	1	0.0555556		0	0	0	1	1	1	0.0555556		0	0	0		0	1	0.0555556		0	0	1	1	0	0
AD	0	1	1	0	0		0	1	0	1	2	1	0.0555556		0	0	0	1	1	1	0.0555556		0	0	0		0	1	0.0555556		0	0	1	1	0	0
AD	1	1	2	0	0		0	1	0	1	2	1	0.0555556		0	0	0	1	0	1	0.0555556		0	0	0		0	1	0.0555556		0	0	1	1	0	0
AD	0	1	1	0	0		0	1	0	1	2	1	0.0555556		0	0	0	1	0	1	0.0555556		0	0	0		0	1	0.0555556		0	0	1	1	0	0
AD	1	1	2	0	0		0	1	0	1	2	1	0.0555556		0	0	0	1	1	1	0.0555556		0	0	0		0	1	0.0555556		1	1	1	3	0	0
AD	1	1	2	0	0		0	1	0	1	2	1	0.0555556		0	0	0	1	1	1	0.0555556		0	0	0		0	1	0.0555556		1	1	1	3	0	0
AD	1	1	2	0	0		0	1	0	1	2	1	0.0555556		0	0	0	1	1	1	0.0555556		0	0	0		0	1	0.0555556		1	1	1	3	0	0
AD	1	1	2	0	0		0	1	0	1	2	1	0.0555556		0	0	0	1	1	1	0.0555556		0	0	0		0	1	0.0555556		1	1	1	3	0	0
AD	1	1	2	0	0		0	1	0	1	2	1	0.0555556		0	0	0	1	0	1	0.0555556		0	0	0		0	1	0.0555556		1	0	1	2	0	0
AD	1	1	2	0	0		0	1	0	1	2	1	0.0555556		0	0	0	1	0	1	0.0555556		0	0	0		0	1	0.0555556		1	0	1	2	0	0
AD	1	1	2	0	0		0	1	0	1	2	1	0.0555556		0	0	0	1	1	1	0.0555556		0	0	0		0	1	0.0555556		1	0	1	2	0	0
AD	1	1	2	0	0		0	1	0	1	2	1	0.0555556		0	0	0	1	1	1	0.0555556		0	0	0		0	1	0.0555556		1	0	1	2	0	0
AD	1	1	2	0	0		0	1	0	1	2	1	0.0555556		0	0	0	1	1	1	0.0555556		0	0	0		0	1	0.0555556		0	0	1	1	0	0
AD	0	1	1	0	0		0	1	0	1	2	1	0.0555556		0	0	0	1	1	1	0.0555556		0	0	0		0	1	0.0555556		0	0	1	1	0	0
AD	0	1	1	0	0		0	1	0	1	2	1	0.0555556		0	0	0	1	1	1	0.0555556		0	0	0		0	1	0.0555556		0	0	1	1	0	0
AD	0	1	1	0	0		0	1	0	1	2	1	0.0555556		0	0	0	1	1	1	0.0555556		0	0	0		0	1	0.0555556		0	0	1	1	0	0
AD	0	1	1	0	0		0	1	0	1	2	1	0.0555556		0	1	1	0	0	0	0		0	0	0		0	1	0.0555556		1	0	0	1	0	0
AD	0	1	1	0	0		0	1	0	1	2	1	0.0555556		0	0	0	1	0	1	0.0555556		0	0	0		0	1	0.0555556		1	0	1	2	0	0
AD	0	1	1	0	0		0	1	0	1	2	1	0.0555556		0	1	1	0	0	0	0		0	0	0		0	1	0.0555556		0	0	1	1	0	0
AD	1	1	2	0	0		0	1	0	1	2	1	0.0555556		0	1	1	0	0	0	0		0	0	0		0	1	0.0555556		1	0	0	1	0	0
AD	0	1	1	0	0		0	1	0	1	2	1	0.0555556		0	1	1	0	0	0	0		0	0	0		0	1	0.0555556		0	0	1	1	0	0
AD	0	1	1	0	0		0	1	0	1	2	1	0.0555556		0	1	1	0	0	0	0		0	0	0		0	1	0.0555556				1	1	0	0
AD	0	1	1	0	0		0	0	1	1	2	1	0.0555556		0	1	1	0	1	1	0.0555556		0	0	0		0	1	0.0555556		1	0	1	2	0	0
AD	0	1	1	0	0		0	1	0	1	2	1	0.0555556		0	1	1	0	1	1	0.0555556		0	0	0		0	1	0.0555556		0	0	1	1	0	0
AD	0	1	1	0	0		0	1	0	1	2	1	0.0555556		0	1	1	0	1	1	0.0555556		0	0	0		0	1	0.0555556		1	0	1	2	0	0
AD	0	1	1	0	0		0	1	0	1	2	1	0.0555556		0	1	1	0	1	1	0.0555556		0	0	0		0	1	0.0555556		1	0	1	2	0	0
AD	0	1	1	0	0		0	1	0	1	2	1	0.0555556		0	1	1	0	1	1	0.0555556		0	0	0		0	1	0.0555556		0	0	1	1	0	0
AD	0	1	1	0	0		0	0	1	1	2	1	0.0555556		0	1	1	0	1	1	0.0555556		0	0	0		0	1	0.0555556		1	0	1	2	0	0
AD	0	1	1	0	0		0	1	0	1	2	1	0.0555556		0	0	0	1	1	1	0.0555556		0	0	0		0	1	0.0555556		0	0	1	1	0	0
AD	0	1	1	0	0		0	1	0	1	2	1	0.0555556		0	0	0	1	1	1	0.0555556		0	0	0		0	1	0.0555556		0	0	1	1	0	0
AD	0	1	1	0	0		0	0	1	1	2	1	0.0555556		0	0	0	1	1	1	0.0555556		0	0	0		0	1	0.0555556		0	0	1	1	0	0
AD	0	1	1	0	0		0	0	1	1	2	1	0.0555556		0	0	0	1	1	1	0.0555556		0	0	0		0	1	0.0555556		0	0	1	1	0	0
AD	0	1	1	0	0		0	1	0	1	2	1	0.0555556		0	0	0	1	1	1	0.0555556		0	0	0		0	1	0.0555556		0	0	1	1	0	0
AD	1	1	2	0	0		0	1	0	1	2	1	0.0555556		0	0	0	1	1	1	0.0555556		0	0	0		0	1	0.0555556		1	0	1	2	0	0
AD	0	1	1	0	0		0	1	0	1	2	1	0.0555556		0	0	0	1	1	1	0.0555556		0	0	0		0	1	0.0555556		0	0	1	1	0	0
AD	0	1	1	0	0		0	1	0	1	2	1	0.0555556		0	0	0	1	1	1	0.0555556		0	0	0		0	1	0.0555556		0	0	1	1	0	0
AD	0	1	1	0	0		0	1	0	1	2	1	0.0555556		0	0	0	1	1	1	0.0555556		0	0	0		0	1	0.0555556		0	0	0	0	1	0.0555556
AD	0	1	1	0	0		0	1	0	1	2	1	0.0555556		0	1	1	0	0	0	0		0	0	0		0	1	0.0555556		0	0	1	1	0	0
AD	0	1	1	0	0		0	1	0	1	2	1	0.0555556		0	1	1	0	0	0	0		0	0	0		0	1	0.0555556		0	0	1	1	0	0
AD	0	1	1	0	0		0	1	0	1	2	1	0.0555556		0	1	1	0	1	1	0.0555556		0	0	0		0	1	0.0555556		0	0	1	1	0	0
AD	0	1	1	0	0		0	1	0	1	2	1	0.0555556		0	1	1	0	0	0	0		0	0	0		0	1	0.0555556		0	0	0	0	1	0.0555556
AD	0	1	1	0	0		0	1	0	1	2	1	0.0555556		0	1	1	0	0	0	0		0	0	0		0	1	0.0555556		0	0	1	1	0	0
AD	0	1	1	0	0		0	1	0	1	2	1	0.0555556		0	1	1	0	0	0	0		0	0	0		0	1	0.0555556		0	0	1	1	0	0
AD	0	1	1	0	0		0	1	0	1	2	1	0.0555556		0	1	1	0	1	1	0.0555556		0	0	0		0	1	0.0555556		0	0	1	1	0	0
AD	0	1	1	0	0		0	1	0	1	2	1	0.0555556		0	1	1	0	0	0	0		0	0	0		0	1	0.0555556		0	0	1	1	0	0
AD	0	1	1	0	0		0	1	0	1	2	1	0.0555556		0	1	1	0	1	1	0.0555556		0	0	0		0	1	0.0555556		0	0	1	1	0	0
AD	0	1	1	0	0		0	1	0	1	2	1	0.0555556		0	1	1	0	0	0	0		0	0	0		0	1	0.0555556		1	0	1	2	0	0
AD	0	1	1	0	0		0	1	0	1	2	1	0.0555556		0	1	1	0	1	1	0.0555556		0	0	0		0	1	0.0555556		0	0	1	1	0	0
AD	0	1	1	0	0		0	1	0	1	2	1	0.0555556		0	0	0	1	1	1	0.0555556		0	0	0		0	1	0.0555556		0	0	1	1	0	0
AD	0	1	1	0	0		0	1	0	1	2	1	0.0555556		0	0	0	1	1	1	0.0555556		0	0	0		0	1	0.0555556		0	0	1	1	0	0
AD	0	1	1	0	0		0	1	0	1	2	1	0.0555556		0	0	0	1	1	1	0.0555556		0	0	0		0	1	0.0555556		0	0	1	1	0	0
AD	0	1	1	0	0		0	1	0	1	2	1	0.0555556		0	0	0	1	1	1	0.0555556		0	0	0		0	1	0.0555556		0	0	1	1	0	0
AD	0	1	1	0	0		0	1	0	1	2	1	0.0555556		0	1	1	0	1	1	0.0555556		0	0	0		0	1	0.0555556		0	0	1	1	0	0
AD	0	1	1	0	0		0	1	0	1	2	1	0.0555556		0	1	1	0	1	1	0.0555556		0	0	0		0	1	0.0555556		0	0	1	1	0	0
AD	0	1	1	0	0		0	1	0	1	2	1	0.0555556		0	1	1	0	1	1	0.0555556		0	0	0		0	1	0.0555556		0	0	1	1	0	0
AD	0	1	1	0	0		0	1	0	1	2	1	0.0555556		0	0	0	1	1	1	0.0555556		0	0	0		0	1	0.0555556		0	0	0	0	1	0.0555556
AD	0	1	1	0	0		0	1	0	1	2	1	0.0555556		0	0	0	1	1	1	0.0555556		0	0	0		0	1	0.0555556		0	0	0	0	1	0.0555556
AD	0	1	1	0	0		0	1	0	1	2	1	0.0555556		0	0	0	1	1	1	0.0555556		0	0	0		0	1	0.0555556		0	0	1	1	0	0
AD	1	1	2	0	0		0	1	0	1	2	1	0.0555556		0	0	0	1	1	1	0.0555556		0	0	0		0	1	0.0555556		0	0	1	1	0	0
AD	0	1	1	0	0		0	1	0	1	2	1	0.0555556		0	0	0	1	0	1	0.0555556		0	0	0		1	0	0		1	0	1	2	0	0
AD	0	1	1	0	0		0	1	0	1	2	1	0.0555556		0	0	0	1	1	1	0.0555556		0	0	0		1	0	0		1	0	1	2	0	0
AD	0	1	1	0	0		0	1	0	1	2	1	0.0555556		0	0	0	1	1	1	0.0555556		0	0	0		1	0	0		0	0	1	1	0	0
AD	0	1	1	0	0		0	1	0	1	2	1	0.0555556		0	0	0	1	1	1	0.0555556		0	0	0		0	1	0.0555556		0	0	1	1	0	0
AD	0	1	1	0	0		0	1	0	1	2	1	0.0555556		0	0	0	1	1	1	0.0555556		0	0	0		0	1	0.0555556		0	0	1	1	0	0
AD	0	1	1	0	0		0	1	0	1	2	1	0.0555556		0	0	0	1	1	1	0.0555556		0	0	0		0	1	0.0555556		0	0	1	1	0	0
AD	0	1	1	0	0		0	1	0	1	2	1	0.0555556		0	0	0	1	1	1	0.0555556		0	0	0		0	1	0.0555556		1	0	0	1	0	0
AD	0	1	1	0	0		0	1	0	1	2	1	0.0555556		0	0	0	1	1	1	0.0555556		0	0	0		0	1	0.0555556		1	0	0	1	0	0
AD	0	1	1	0	0		0	1	0	1	2	1	0.0555556		0	0	0	1	1	1	0.0555556		0	0	0		0	1	0.0555556		0	0	0	0	1	0.0555556
AD	0	1	1	0	0		0	1	0	1	2	1	0.0555556		0	0	0	1	1	1	0.0555556		0	0	0		0	1	0.0555556		0	0	1	1	0	0
AD	0	1	1	0	0		0	1	0	1	2	1	0.0555556		0	0	0	1	1	1	0.0555556		0	0	0		0	1	0.0555556		0	0	1	1	0	0
AD	0	1	1	0	0		0	1	0	1	2	1	0.0555556		0	0	0	1	1	1	0.0555556		0	0	0		0	1	0.0555556		0	0	1	1	0	0
AD	0	1	1	0	0		0	1	0	1	2	1	0.0555556		0	0	0	1	1	1	0.0555556		0	0	0		0	1	0.0555556		0	0	1	1	0	0
AD	0	0	0	1	0.0555556		0	1	0	1	2	1	0.0555556		0	0	0	1	1	1	0.0555556		0	0	0		0	1	0.0555556		0	0	1	1	0	0
AD	0	0	0	1	0.0555556		0	1	0	1	2	1	0.0555556		0	0	0	1	0	1	0.0555556		0	0	0		0	1	0.0555556		0	0	0	0	1	0.0555556
AD	0	0	0	1	0.0555556		0	1	0	1	2	1	0.0555556		0	0	0	1	1	1	0.0555556		0	0	0		0	1	0.0555556		0	0	1	1	0	0
AD	0	0	0	1	0.0555556		0	1	0	1	2	1	0.0555556		0	0	0	1	1	1	0.0555556		0	0	0		0	1	0.0555556		0	0	1	1	0	0
AD	0	0	0	1	0.0555556		0	1	0	1	2	1	0.0555556		0	0	0	1	0	1	0.0555556		0	0	0		0	1	0.0555556		0	0	1	1	0	0
AD	0	0	0	1	0.0555556		0	1	0	1	2	1	0.0555556		0	0	0	1	1	1	0.0555556		0	0	0		0	1	0.0555556		0	0	1	1	0	0
AD	0	0	0	1	0.0555556		0	1	0	1	2	1	0.0555556		0	0	0	1	1	1	0.0555556		0	0	0		0	1	0.0555556		0	0	1	1	0	0
AD	0	0	0	1	0.0555556		0	1	0	1	2	1	0.0555556		0	0	0	1	1	1	0.0555556		0	0	0		1	0	0		0	0	1	1	0	0
AD	0	0	0	1	0.0555556		0	1	0	1	2	1	0.0555556		0	0	0	1	1	1	0.0555556		0	0	0		0	1	0.0555556		0	0	1	1	0	0
AD	0	0	0	1	0.0555556		0	1	0	1	2	1	0.0555556		0	0	0	1	0	1	0.0555556		0	0	0		0	1	0.0555556		0	0	1	1	0	0
AD	0	0	0	1	0.0555556		0	1	0	1	2	1	0.0555556		0	0	0	1	1	1	0.0555556		0	0	0		0	1	0.0555556		0	0	1	1	0	0
AD	0	0	0	1	0.0555556		0	1	0	1	2	1	0.0555556		0	0	0	1	1	1	0.0555556		0	0	0		0	1	0.0555556		0	0	1	1	0	0
AD	0	0	0	1	0.0555556		0	1	0	1	2	1	0.0555556		0	0	0	1	1	1	0.0555556		0	0	0		0	1	0.0555556		0	0	0	0	1	0.0555556
AD	0	0	0	1	0.0555556		0	1	0	1	2	1	0.0555556		0	0	0	1	1	1	0.0555556		0	0	0		0	1	0.0555556		0	0	1	1	0	0
AD	0	0	0	1	0.0555556		0	1	0	1	2	1	0.0555556		0	0	0	1	1	1	0.0555556		0	0	0		0	1	0.0555556		0	0	0	0	1	0.0555556
AD	0	0	0	1	0.0555556		0	1	0	1	2	1	0.0555556		0	0	0	1	1	1	0.0555556		0	0	0		0	1	0.0555556		0	0	1	1	0	0
AD	0	0	0	1	0.0555556		0	1	0	1	2	1	0.0555556		0	0	0	1	1	1	0.0555556		0	0	0		0	1	0.0555556		0	0	1	1	0	0
AD	0	0	0	1	0.0555556		0	1	0	1	2	1	0.0555556		0	0	0	1	1	1	0.0555556		0	0	0		0	1	0.0555556		0	0	1	1	0	0
AD	0	0	0	1	0.0555556		0	1	0	1	2	1	0.0555556		0	0	0	1	1	1	0.0555556		0	0	0		0	1	0.0555556		0	0	0	0	1	0.0555556
AD	0	0	0	1	0.0555556		0	1	0	1	2	1	0.0555556		0	0	0	1	1	1	0.0555556		0	0	0		0	1	0.0555556		0	0	0	0	1	0.0555556
AD	0	1	1	0	0		0	1	0	1	2	1	0.0555556		0	0	0	1	1	1	0.0555556		0	0	0		1	0	0		0	0	1	1	0	0
AD	0	1	1	0	0		0	1	0	1	2	1	0.0555556		0	0	0	1	1	1	0.0555556		0	0	0		1	0	0		0	0	1	1	0	0
AD	0	1	1	0	0		0	1	0	1	2	1	0.0555556		0	0	0	1	1	1	0.0555556		0	0	0		0	1	0.0555556		1	0	1	2	0	0
AD	0	1	1	0	0		0	1	0	1	2	1	0.0555556		0	0	0	1	1	1	0.0555556		0	0	0		0	1	0.0555556		0	0	1	1	0	0
AD	0	1	1	0	0		0	1	0	1	2	1	0.0555556		0	0	0	1	1	1	0.0555556		0	0	0		0	1	0.0555556		0	0	1	1	0	0
AD	0	1	1	0	0		0	1	0	1	2	1	0.0555556		0	0	0	1	1	1	0.0555556		0	0	0		0	1	0.0555556		0	0	1	1	0	0
AD	0	1	1	0	0		0	1	0	1	2	1	0.0555556		0	0	0	1	1	1	0.0555556		0	0	0		0	1	0.0555556		1	0	1	2	0	0
AD	0	1	1	0	0		0	1	0	1	2	1	0.0555556		0	0	0	1	1	1	0.0555556		0	0	0		0	1	0.0555556		0	0	1	1	0	0
AD	0	1	1	0	0		0	1	0	1	2	1	0.0555556		0	0	0	1	1	1	0.0555556		0	0	0		0	1	0.0555556		0	0	1	1	0	0
AD	0	1	1	0	0		0	1	0	1	2	1	0.0555556		0	0	0	1	1	1	0.0555556		0	0	0		0	1	0.0555556		0	0	1	1	0	0
AD	0	1	1	0	0		0	1	0	1	2	1	0.0555556		0	0	0	1	1	1	0.0555556		0	0	0		0	1	0.0555556		0	0	1	1	0	0
AD	1	0	1	0	0		0	1	0	1	2	1	0.0555556		0	0	0	1	1	1	0.0555556		0	0	0		1	0	0		1	0	1	2	0	0
AD	0	0	0	1	0.0555556		0	1	0	1	2	1	0.0555556		0	0	0	1	1	1	0.0555556		0	0	0		0	1	0.0555556		0	0	1	1	0	0
AD	0	0	0	1	0.0555556		0	1	0	1	2	1	0.0555556		0	0	0	1	1	1	0.0555556		0	0	0		0	1	0.0555556		0	0	1	1	0	0
AD	1	0	1	0	0		0	1	0	1	2	1	0.0555556		0	0	0	1	1	1	0.0555556		0	0	0		1	0	0		1	0	1	2	0	0
AD	1	0	1	0	0		0	1	0	1	2	1	0.0555556		0	0	0	1	1	1	0.0555556		0	0	0		1	0	0		1	0	1	2	0	0
AD	0	0	0	1	0.0555556		0	1	0	1	2	1	0.0555556		0	0	0	1	1	1	0.0555556		0	0	0		0	1	0.0555556		1	0	1	2	0	0
AD	0	0	0	1	0.0555556		0	1	0	1	2	1	0.0555556		0	0	0	1	1	1	0.0555556		0	0	0		0	1	0.0555556		0	0	1	1	0	0
AD	0	0	0	1	0.0555556		0	1	0	1	2	1	0.0555556		0	0	0	1	1	1	0.0555556		0	0	0		0	1	0.0555556		1	0	1	2	0	0
AD	0	0	0	1	0.0555556		0	1	0	1	2	1	0.0555556		0	0	0	1	1	1	0.0555556		0	0	0		0	1	0.0555556		0	0	1	1	0	0
AD	0	0	0	1	0.0555556		0	1	0	1	2	1	0.0555556		0	0	0	1	1	1	0.0555556		0	0	0		0	1	0.0555556		0	0	1	1	0	0
AD	0	0	0	1	0.0555556		0	1	0	1	2	1	0.0555556		0	0	0	1	1	1	0.0555556		0	0	0		0	1	0.0555556		0	0	0	0	1	0.0555556
AD	0	0	0	1	0.0555556		0	1	0	1	2	1	0.0555556		0	0	0	1	1	1	0.0555556		0	0	0		0	1	0.0555556		0	0	1	1	0	0
AD	0	0	0	1	0.0555556		0	1	0	1	2	1	0.0555556		0	0	0	1	1	1	0.0555556		0	0	0		0	1	0.0555556		0	0	1	1	0	0
AD	0	1	1	0	0		0	1	0	1	2	1	0.0555556		0	0	0	1	0	1	0.0555556		0	0	0		0	1	0.0555556		1	0	1	2	0	0
AD	0	1	1	0	0		0	1	0	1	2	1	0.0555556		0	0	0	1	0	1	0.0555556		0	0	0		0	1	0.0555556		1	0	1	2	0	0
AD	0	1	1	0	0		0	1	0	1	2	1	0.0555556		0	0	0	1	0	1	0.0555556		0	0	0		0	1	0.0555556		0	0	1	1	0	0
AD	0	1	1	0	0		0	1	0	1	2	1	0.0555556		0	0	0	1	1	1	0.0555556		0	0	0		0	1	0.0555556		0	0	1	1	0	0
AD	0	1	1	0	0		0	1	0	1	2	1	0.0555556		0	0	0	1	1	1	0.0555556		0	0	0		0	1	0.0555556		0	0	1	1	0	0
AD	0	1	1	0	0		0	1	0	1	2	1	0.0555556		0	0	0	1	1	1	0.0555556		0	0	0		0	1	0.0555556		0	0	1	1	0	0
AD	0	1	1	0	0		0	1	0	1	2	1	0.0555556		0	0	0	1	1	1	0.0555556		0	0	0		0	1	0.0555556		0	0	1	1	0	0
AD	0	1	1	0	0		0	1	0	1	2	1	0.0555556		0	0	0	1	1	1	0.0555556		0	0	0		0	1	0.0555556		0	0	1	1	0	0
AD	1	1	2	0	0		0	0	1	1	2	1	0.0555556		0	0	0	1	0	1	0.0555556		0	0	0		0	1	0.0555556		1	0	0	1	0	0
AD	0	1	1	0	0		0	0	1	1	2	1	0.0555556		0	0	0	1	1	1	0.0555556		0	0	0		1	0	0		1	0	1	2	0	0
AD	0	1	1	0	0		0	1	0	1	2	1	0.0555556		0	0	0	1	0	1	0.0555556		0	0	0		0	1	0.0555556		0	0	1	1	0	0
AD	0	1	1	0	0		0	1	0	1	2	1	0.0555556		0	0	0	1	1	1	0.0555556		0	0	0		0	1	0.0555556		0	0	1	1	0	0
AD	0	1	1	0	0		0	1	0	1	2	1	0.0555556		0	0	0	1	1	1	0.0555556		0	0	0		0	1	0.0555556		0	0	1	1	0	0
AD	0	1	1	0	0		0	1	0	1	2	1	0.0555556		0	0	0	1	1	1	0.0555556		0	0	0		0	1	0.0555556		1	0	1	2	0	0
AD	1	0	1	0	0		0	1	0	1	2	1	0.0555556		0	1	1	0	0	0	0		0	0	0		0	1	0.0555556		0	0	1	1	0	0
AD	1	0	1	0	0		0	1	0	1	2	1	0.0555556		0	1	1	0	0	0	0		0	0	0		0	1	0.0555556		0	0	1	1	0	0
AD	0	0	0	1	0.0555556		0	1	0	1	2	1	0.0555556		0	1	1	0	0	0	0		0	0	0		0	1	0.0555556		0	0	1	1	0	0
AD	0	0	0	1	0.0555556		0	1	0	1	2	1	0.0555556		0	1	1	0	0	0	0		0	0	0		0	1	0.0555556		0	0	1	1	0	0
AD	0	0	0	1	0.0555556		0	1	0	1	2	1	0.0555556		0	1	1	0	0	0	0		0	0	0		0	1	0.0555556		0	0	1	1	0	0
AD	0	0	0	1	0.0555556		0	1	0	1	2	1	0.0555556		0	1	1	0	0	0	0		0	0	0		0	1	0.0555556		0	0	1	1	0	0
AD	0	0	0	1	0.0555556		0	1	0	1	2	1	0.0555556		0	1	1	0	0	0	0		0	0	0		0	1	0.0555556		0	0	1	1	0	0
AD	0	0	0	1	0.0555556		0	1	0	1	2	1	0.0555556		0	1	1	0	0	0	0		0	0	0		0	1	0.0555556		0	0	1	1	0	0
AD	0	0	0	1	0.0555556		0	1	0	1	2	1	0.0555556		0	1	1	0	0	0	0		0	0	0		0	1	0.0555556		0	0	1	1	0	0
AD	0	0	0	1	0.0555556		0	1	0	1	2	1	0.0555556		0	1	1	0	0	0	0		0	0	0		0	1	0.0555556		0	0	1	1	0	0
AD	0	0	0	1	0.0555556		0	1	0	1	2	1	0.0555556		0	0	0	1	0	1	0.0555556		0	0	0		0	1	0.0555556		1	0	0	1	0	0
AD	0	0	0	1	0.0555556		0	1	0	1	2	1	0.0555556		0	1	1	0	0	0	0		0	0	0		0	1	0.0555556		0	0	1	1	0	0
AD	1	0	1	0	0		0	1	0	1	2	1	0.0555556		0	1	1	0	0	0	0		0	0	0		0	1	0.0555556		0	0	0	0	1	0.0555556
AD	0	0	0	1	0.0555556		0	1	0	1	2	1	0.0555556		0	1	1	0	0	0	0		0	0	0		0	1	0.0555556		0	0	1	1	0	0
AD	0	0	0	1	0.0555556		0	1	0	1	2	1	0.0555556		0	1	1	0	0	0	0		0	0	0		0	1	0.0555556		0	0	1	1	0	0
AD	0	0	0	1	0.0555556		0	1	0	1	2	1	0.0555556		0	1	1	0	0	0	0		0	0	0		0	1	0.0555556		1	0	1	2	0	0
AD	0	0	0	1	0.0555556		0	1	0	1	2	1	0.0555556		0	1	1	0	0	0	0		0	0	0		0	1	0.0555556		0	0	1	1	0	0
AD	0	0	0	1	0.0555556		0	1	0	1	2	1	0.0555556		0	1	1	0	0	0	0		0	0	0		0	1	0.0555556		0	0	0	0	1	0.0555556
AD	0	0	0	1	0.0555556		0	1	0	1	2	1	0.0555556		0	1	1	0	0	0	0		0	0	0		0	1	0.0555556		0	0	1	1	0	0
AD	0	0	0	1	0.0555556		0	1	0	1	2	1	0.0555556		0	1	1	0	0	0	0		0	0	0		0	1	0.0555556				0	0	1	0.0555556
AD	1	0	1	0	0		0	0	1	1	2	1	0.0555556		0	0	0	1	1	1	0.0555556		0	0	0		1	0	0		0	0	1	1	0	0
AD	0	0	0	1	0.0555556		0	1	0	1	2	1	0.0555556		0	0	0	1	1	1	0.0555556		0	0	0		0	1	0.0555556		0	0	1	1	0	0
AD	1	0	1	0	0		0	1	0	1	2	1	0.0555556		0	0	0	1	1	1	0.0555556		0	0	0		1	0	0		1	0	1	2	0	0
AD	0	0	0	1	0.0555556		0	0	0	1	1	1	0.0555556		0	0	0	1	1	1	0.0555556		0	0	0		1	0	0		0	0	1	1	0	0
AD	1	0	1	0	0		0	1	0	1	2	1	0.0555556		0	0	0	1	1	1	0.0555556		0	0	0		1	0	0		0	0	1	1	0	0
AD	0	0	0	1	0.0555556		0	1	0	1	2	1	0.0555556		0	0	0	1	1	1	0.0555556		0	0	0		0	1	0.0555556		0	0	0	0	1	0.0555556
AD	0	0	0	1	0.0555556		0	1	0	1	2	1	0.0555556		0	0	0	1	1	1	0.0555556		0	0	0		0	1	0.0555556		0	0	1	1	0	0
AD	0	0	0	1	0.0555556		0	0	1	1	2	1	0.0555556		0	0	0	1	1	1	0.0555556		0	0	0		1	0	0		0	0	1	1	0	0
AD	0	0	0	1	0.0555556		0	0	1	1	2	1	0.0555556		0	0	0	1	1	1	0.0555556		0	0	0		1	0	0		0	0	1	1	0	0
AD	0	0	0	1	0.0555556		0	0	1	1	2	1	0.0555556		0	0	0	1	1	1	0.0555556		0	0	0		1	0	0		0	0	1	1	0	0
AD	1	0	1	0	0		0	0	1	1	2	1	0.0555556		0	0	0	1	1	1	0.0555556		0	0	0		1	0	0		1	0	0	1	0	0
AD	1	0	1	0	0		0	0	1	1	2	1	0.0555556		0	0	0	1	0	1	0.0555556		0	0	0		1	0	0		1	0	1	2	0	0
AD	0	0	0	1	0.0555556		0	0	1	1	2	1	0.0555556		0	0	0	1	1	1	0.0555556		0	0	0		0	1	0.0555556		0	0	0	0	1	0.0555556
AD	1	0	1	0	0		0	0	1	1	2	1	0.0555556		0	0	0	1	1	1	0.0555556		0	0	0		1	0	0		1	0	0	1	0	0
AD	1	0	1	0	0		0	0	1	1	2	1	0.0555556		0	0	0	1	1	1	0.0555556		0	0	0		1	0	0		1	0	0	1	0	0
AD	1	0	1	0	0		0	0	1	1	2	1	0.0555556		0	0	0	1	1	1	0.0555556		0	0	0		1	0	0		0	0	1	1	0	0
AD	0	0	0	1	0.0555556		0	0	1	1	2	1	0.0555556		0	0	0	1	0	1	0.0555556		0	0	0		0	1	0.0555556		0	0	1	1	0	0
AD	0	0	0	1	0.0555556		0	0	1	1	2	1	0.0555556		0	0	0	1	0	1	0.0555556		0	0	0		0	1	0.0555556		0	0	1	1	0	0
AD	1	0	1	0	0		0	0	1	1	2	1	0.0555556		0	0	0	1	1	1	0.0555556		0	0	0		1	0	0		1	0	0	1	0	0
AD	0	0	0	1	0.0555556		0	1	0	1	2	1	0.0555556		0	0	0	1	1	1	0.0555556		0	0	0		1	0	0		0	0	1	1	0	0
AD	0	0	0	1	0.0555556		0	1	0	1	2	1	0.0555556		0	0	0	1	1	1	0.0555556		0	0	0		1	0	0		0	0	1	1	0	0
AD	0	0	0	1	0.0555556		0	1	0	1	2	1	0.0555556		0	0	0	1	1	1	0.0555556		0	0	0		1	0	0		0	0	1	1	0	0
AD	0	0	0	1	0.0555556		0	1	0	1	2	1	0.0555556		0	0	0	1	1	1	0.0555556		0	0	0		1	0	0		0	0	1	1	0	0
AD	0	0	0	1	0.0555556		0	1	0	1	2	1	0.0555556		0	0	0	1	1	1	0.0555556		0	0	0		0	1	0.0555556		0	0	0	0	1	0.0555556
AD	0	0	0	1	0.0555556		0	1	0	1	2	1	0.0555556		0	0	0	1	1	1	0.0555556		0	0	0		0	1	0.0555556		0	0	0	0	1	0.0555556
AD	0	0	0	1	0.0555556		0	1	0	1	2	1	0.0555556		0	0	0	1	1	1	0.0555556		0	0	0		0	1	0.0555556		0	0	0	0	1	0.0555556
AD	0	0	0	1	0.0555556		0	0	1	1	2	1	0.0555556		0	0	0	1	1	1	0.0555556		0	0	0		1	0	0		1	0	1	2	0	0
AD	0	0	0	1	0.0555556		0	0	1	1	2	1	0.0555556		0	0	0	1	1	1	0.0555556		0	0	0		1	0	0		1	0	1	2	0	0
AD	0	0	0	1	0.0555556		0	0	1	1	2	1	0.0555556		0	0	0	1	1	1	0.0555556		0	0	0		0	1	0.0555556		1	0	1	2	0	0
AD	0	0	0	1	0.0555556		0	0	1	1	2	1	0.0555556		0	0	0	1	1	1	0.0555556		0	0	0		0	1	0.0555556		1	0	1	2	0	0
AD	0	0	0	1	0.0555556		0	0	1	1	2	1	0.0555556		0	0	0	1	1	1	0.0555556		0	0	0		0	1	0.0555556		1	0	1	2	0	0
AD	0	0	0	1	0.0555556		0	1	0	1	2	1	0.0555556		0	0	0	1	1	1	0.0555556		0	0	0		0	1	0.0555556		0	0	1	1	0	0
AD	0	0	0	1	0.0555556		0	1	0	1	2	1	0.0555556		0	0	0	1	1	1	0.0555556		0	0	0		0	1	0.0555556		0	0	1	1	0	0
AD	0	0	0	1	0.0555556		0	1	0	1	2	1	0.0555556		0	0	0	1	1	1	0.0555556		0	0	0		0	1	0.0555556		0	0	1	1	0	0
AD	1	0	1	0	0		0	1	0	1	2	1	0.0555556		0	0	0	1	1	1	0.0555556		0	0	0		0	1	0.0555556		1	0	1	2	0	0
AD	1	0	1	0	0		0	1	0	1	2	1	0.0555556		0	0	0	1	1	1	0.0555556		0	0	0		0	1	0.0555556		1	0	1	2	0	0
AD	0	0	0	1	0.0555556		0	1	0	1	2	1	0.0555556		0	0	0	1	1	1	0.0555556		0	0	0		1	0	0		0	0	1	1	0	0
AD	0	0	0	1	0.0555556		0	1	0	1	2	1	0.0555556		0	0	0	1	1	1	0.0555556		0	0	0		1	0	0		0	0	1	1	0	0
AD	0	0	0	1	0.0555556		0	0	1	1	2	1	0.0555556		0	0	0	1	1	1	0.0555556		0	0	0		1	0	0		0	0	0	0	1	0.0555556
AD	1	0	1	0	0		0	1	0	1	2	1	0.0555556		0	0	0	1	1	1	0.0555556		0	0	0		1	0	0		0	0	1	1	0	0
AD	1	0	1	0	0		0	0	1	1	2	1	0.0555556		0	0	0	1	1	1	0.0555556		0	0	0		1	0	0		1	0	0	1	0	0
AD	0	0	0	1	0.0555556		0	0	1	1	2	1	0.0555556		0	0	0	1	1	1	0.0555556		0	0	0		1	0	0		0	0	0	0	1	0.0555556
AD	0	0	0	1	0.0555556		0	0	1	1	2	1	0.0555556		0	0	0	1	1	1	0.0555556		0	0	0		1	0	0		0	0	0	0	1	0.0555556
AD	0	0	0	1	0.0555556		0	0	1	1	2	1	0.0555556		0	0	0	1	1	1	0.0555556		0	0	0		1	0	0		0	0	0	0	1	0.0555556
AD	0	0	0	1	0.0555556		0	1	0	1	2	1	0.0555556		0	0	0	1	1	1	0.0555556		0	0	0		1	0	0		0	0	0	0	1	0.0555556
AD	0	0	0	1	0.0555556		0	0	1	1	2	1	0.0555556		0	0	0	1	0	1	0.0555556		0	0	0		1	0	0		0	0	1	1	0	0
AD	0	0	0	1	0.0555556		0	0	1	1	2	1	0.0555556		0	0	0	1	0	1	0.0555556		0	0	0		1	0	0		0	0	0	0	1	0.0555556
AD	0	0	0	1	0.0555556		0	0	1	1	2	1	0.0555556		0	0	0	1	1	1	0.0555556		0	0	0		1	0	0		0	0	1	1	0	0
AD	0	0	0	1	0.0555556		0	0	1	1	2	1	0.0555556		0	0	0	1	1	1	0.0555556		0	0	0		1	0	0		0	0	0	0	1	0.0555556
AD	0	0	0	1	0.0555556		0	0	0	1	1	1	0.0555556		0	0	0	1	1	1	0.0555556		0	0	0		1	0	0		0	0	0	0	1	0.0555556
AD	0	0	0	1	0.0555556		0	0	0	1	1	1	0.0555556		0	0	0	1	1	1	0.0555556		0	0	0		1	0	0		0	0	0	0	1	0.0555556
AD	0	0	0	1	0.0555556		0	1	0	1	2	1	0.0555556		0	0	0	1	1	1	0.0555556		0	0	0		1	0	0		1	0	0	1	0	0
AD	0	0	0	1	0.0555556		0	1	0	1	2	1	0.0555556		0	0	0	1	1	1	0.0555556		0	0	0		0	1	0.0555556		0	0	1	1	0	0
AD	0	0	0	1	0.0555556		0	1	0	1	2	1	0.0555556		0	0	0	1	1	1	0.0555556		0	0	0		1	0	0		0	0	0	0	1	0.0555556
AD	0	0	0	1	0.0555556		0	1	0	1	2	1	0.0555556		0	0	0	1	1	1	0.0555556		0	0	0		0	1	0.0555556		0	0	0	0	1	0.0555556
AD	0	0	0	1	0.0555556		0	1	0	1	2	1	0.0555556		0	0	0	1	1	1	0.0555556		0	0	0		0	1	0.0555556		1	0	0	1	0	0
AD	0	0	0	1	0.0555556		0	1	0	1	2	1	0.0555556		0	0	0	1	1	1	0.0555556		0	0	0		0	1	0.0555556		0	0	0	0	1	0.0555556
AD	0	0	0	1	0.0555556		0	0	1	1	2	1	0.0555556		0	0	0	1	1	1	0.0555556		0	0	0		1	0	0		1	0	0	1	0	0
AD	0	0	0	1	0.0555556		0	1	0	1	2	1	0.0555556		0	0	0	1	1	1	0.0555556		0	0	0		1	0	0		0	0	0	0	1	0.0555556
AD	0	0	0	1	0.0555556		0	0	1	1	2	1	0.0555556		0	0	0	1	1	1	0.0555556		0	0	0		1	0	0		1	0	1	2	0	0
AD	1	0	1	0	0		0	1	0	1	2	1	0.0555556		0	0	0	1	1	1	0.0555556		0	0	0		0	1	0.0555556		1	0	1	2	0	0
AD	0	0	0	1	0.0555556		0	1	0	1	2	1	0.0555556		0	0	0	1	1	1	0.0555556		0	0	0		0	1	0.0555556		0	0	1	1	0	0
AD	0	0	0	1	0.0555556		0	1	0	1	2	1	0.0555556		0	0	0	1	1	1	0.0555556		0	0	0		0	1	0.0555556		1	0	0	1	0	0
AD	0	0	0	1	0.0555556		0	1	0	1	2	1	0.0555556		0	0	0	1	1	1	0.0555556		0	0	0		0	1	0.0555556		0	0	1	1	0	0
AD	0	0	0	1	0.0555556		0	1	0	1	2	1	0.0555556		0	0	0	1	0	1	0.0555556		0	0	0		1	0	0		0	0	1	1	0	0
AD	0	0	0	1	0.0555556		0	1	0	1	2	1	0.0555556		0	0	0	1	1	1	0.0555556		0	0	0		0	1	0.0555556		0	0	1	1	0	0
AD	1	0	1	0	0		0	0	1	1	2	1	0.0555556		0	0	0	1	1	1	0.0555556		0	0	0		1	0	0		1	0	0	1	0	0
AD	0	0	0	1	0.0555556		0	1	0	1	2	1	0.0555556		0	0	0	1	1	1	0.0555556		0	0	0		1	0	0		0	0	0	0	1	0.0555556
AD	1	0	1	0	0		0	0	1	1	2	1	0.0555556		0	0	0	1	0	1	0.0555556		0	0	0		1	0	0		0	0	1	1	0	0
AD	0	0	0	1	0.0555556		0	0	1	1	2	1	0.0555556		0	0	0	1	1	1	0.0555556		0	0	0		0	1	0.0555556		0	0	1	1	0	0
AD	0	0	0	1	0.0555556		0	0	1	1	2	1	0.0555556		0	0	0	1	0	1	0.0555556		0	0	0		1	0	0		0	0	0	0	1	0.0555556
AD	0	0	0	1	0.0555556		0	1	0	1	2	1	0.0555556		0	0	0	1	1	1	0.0555556		0	0	0		0	1	0.0555556		0	0	1	1	0	0
AD	0	0	0	1	0.0555556		0	1	0	1	2	1	0.0555556		0	0	0	1	1	1	0.0555556		0	0	0		0	1	0.0555556		0	0	1	1	0	0
AD	0	0	0	1	0.0555556		0	1	0	1	2	1	0.0555556		0	0	0	1	1	1	0.0555556		0	0	0		0	1	0.0555556		0	0	0	0	1	0.0555556
AD	1	0	1	0	0		0	0	1	1	2	1	0.0555556		0	0	0	1	1	1	0.0555556		0	0	0		1	0	0		1	0	0	1	0	0
AD	0	0	0	1	0.0555556		0	0	1	1	2	1	0.0555556		0	0	0	1	1	1	0.0555556		0	0	0		0	1	0.0555556		0	0	1	1	0	0
AD	0	0	0	1	0.0555556		0	1	0	1	2	1	0.0555556		0	0	0	1	0	1	0.0555556		0	0	0		1	0	0		1	0	1	2	0	0
AD	1	0	1	0	0		0	1	0	1	2	1	0.0555556		0	0	0	1	1	1	0.0555556		0	0	0		0	1	0.0555556		0	0	1	1	0	0
AD	0	0	0	1	0.0555556		0	0	1	1	2	1	0.0555556		0	0	0	1	1	1	0.0555556		0	0	0		0	1	0.0555556		0	0	0	0	1	0.0555556
AD	0	1	1	0	0		0	1	0	1	2	1	0.0555556		0	0	0	1	1	1	0.0555556		0	0	0		0	1	0.0555556				0	0	1	0.0555556
AD	0	1	1	0	0		0	1	0	1	2	1	0.0555556		0	0	0	1	1	1	0.0555556		0	0	0		0	1	0.0555556		1	0	1	2	0	0
AD	0	1	1	0	0		0	1	0	1	2	1	0.0555556		0	0	0	1	1	1	0.0555556		0	0	0		0	1	0.0555556		0	0	1	1	0	0
AD	0	1	1	0	0		0	1	0	1	2	1	0.0555556		0	0	0	1	1	1	0.0555556		0	0	0		0	1	0.0555556		0	0	1	1	0	0
AD	0	1	1	0	0		0	1	0	1	2	1	0.0555556		0	0	0	1	1	1	0.0555556		0	0	0		0	1	0.0555556		0	0	1	1	0	0
AD	0	1	1	0	0		0	1	0	1	2	1	0.0555556		0	0	0	1	1	1	0.0555556		0	0	0		0	1	0.0555556		0	0	1	1	0	0
AD	0	1	1	0	0		0	1	0	1	2	1	0.0555556		0	0	0	1	1	1	0.0555556		0	0	0		0	1	0.0555556		1	0	1	2	0	0
AD	0	1	1	0	0		0	1	0	1	2	1	0.0555556		0	0	0	1	1	1	0.0555556		0	0	0		0	1	0.0555556		0	0	1	1	0	0
AD	0	1	1	0	0		0	1	0	1	2	1	0.0555556		0	0	0	1	1	1	0.0555556		0	0	0		0	1	0.0555556		0	0	1	1	0	0
AD	0	1	1	0	0		0	1	0	1	2	1	0.0555556		0	0	0	1	1	1	0.0555556		0	0	0		0	1	0.0555556		1	0	1	2	0	0
AD	0	1	1	0	0		0	1	0	1	2	1	0.0555556		0	0	0	1	1	1	0.0555556		0	0	0		0	1	0.0555556		0	0	1	1	0	0
AD	0	1	1	0	0		0	1	0	1	2	1	0.0555556		0	0	0	1	1	1	0.0555556		0	0	0		0	1	0.0555556		1	0	0	1	0	0
AD	0	1	1	0	0		0	1	0	1	2	1	0.0555556		0	0	0	1	1	1	0.0555556		0	0	0		0	1	0.0555556		0	0	0	0	1	0.0555556
AD	0	1	1	0	0		0	1	0	1	2	1	0.0555556		0	0	0	1	1	1	0.0555556		0	0	0		0	1	0.0555556		0	0	1	1	0	0
AD	0	1	1	0	0		0	1	0	1	2	1	0.0555556		0	0	0	1	1	1	0.0555556		0	0	0		0	1	0.0555556		1	0	1	2	0	0
AD	0	1	1	0	0		0	1	0	1	2	1	0.0555556		0	0	0	1	1	1	0.0555556		0	0	0		0	1	0.0555556		0	0	1	1	0	0
AD	0	1	1	0	0		0	1	0	1	2	1	0.0555556		0	0	0	1	1	1	0.0555556		0	0	0		0	1	0.0555556		1	0	0	1	0	0
AD	0	1	1	0	0		0	1	0	1	2	1	0.0555556		0	0	0	1	1	1	0.0555556		0	0	0		1	0	0		1	0	1	2	0	0
AD	0	1	1	0	0		0	1	0	1	2	1	0.0555556		0	0	0	1	1	1	0.0555556		0	0	0		0	1	0.0555556		1	0	1	2	0	0
AD	0	1	1	0	0		0	1	0	1	2	1	0.0555556		0	0	0	1	1	1	0.0555556		0	0	0		0	1	0.0555556		0	0	1	1	0	0
AD	0	1	1	0	0		0	1	0	1	2	1	0.0555556		0	0	0	1	1	1	0.0555556		0	0	0		0	1	0.0555556		1	0	1	2	0	0
AD	0	1	1	0	0		0	1	0	1	2	1	0.0555556		0	0	0	1	1	1	0.0555556		0	0	0		0	1	0.0555556		0	0	1	1	0	0
AD	0	1	1	0	0		0	1	0	1	2	1	0.0555556		0	0	0	1	1	1	0.0555556		0	0	0		0	1	0.0555556		1	0	1	2	0	0
AD	0	1	1	0	0		0	1	0	1	2	1	0.0555556		0	0	0	1	1	1	0.0555556		0	0	0		0	1	0.0555556		0	0	1	1	0	0
AD	0	1	1	0	0		0	1	0	1	2	1	0.0555556		0	0	0	1	1	1	0.0555556		0	0	0		1	0	0		1	0	1	2	0	0
AD	0	1	1	0	0		0	1	0	1	2	1	0.0555556		0	0	0	1	1	1	0.0555556		0	0	0		0	1	0.0555556		0	0	1	1	0	0
AD	0	1	1	0	0		0	1	0	1	2	1	0.0555556		0	0	0	1	1	1	0.0555556		0	0	0		1	0	0		0	0	0	0	1	0.0555556
AD	0	1	1	0	0		0	1	0	1	2	1	0.0555556		0	0	0	1	1	1	0.0555556		0	0	0		0	1	0.0555556		0	0	1	1	0	0
AD	0	1	1	0	0		0	1	0	1	2	1	0.0555556		0	0	0	1	1	1	0.0555556		0	0	0		0	1	0.0555556		0	0	0	0	1	0.0555556
AD	0	1	1	0	0		0	1	0	1	2	1	0.0555556		0	0	0	1	1	1	0.0555556		0	0	0		0	1	0.0555556		0	0	0	0	1	0.0555556
AD	0	1	1	0	0		0	1	0	1	2	1	0.0555556		0	0	0	1	1	1	0.0555556		0	0	0		0	1	0.0555556		0	0	0	0	1	0.0555556
AD	0	1	1	0	0		0	1	0	1	2	1	0.0555556		0	0	0	1	1	1	0.0555556		0	0	0		0	1	0.0555556		0	0	1	1	0	0
AD	0	1	1	0	0		0	1	0	1	2	1	0.0555556		0	0	0	1	1	1	0.0555556		0	0	0		0	1	0.0555556		0	0	0	0	1	0.0555556
AD	0	1	1	0	0		0	1	0	1	2	1	0.0555556		0	0	0	1	1	1	0.0555556		0	0	0		1	0	0		0	0	1	1	0	0
AD	1	1	2	0	0		0	1	0	1	2	1	0.0555556		0	0	0	1	1	1	0.0555556		0	0	0		1	0	0		1	0	1	2	0	0
AD	0	0	0	1	0.0555556		0	1	0	1	2	1	0.0555556		0	0	0	1	1	1	0.0555556		0	0	0		0	1	0.0555556		1	0	1	2	0	0
AD	0	0	0	1	0.0555556		0	1	0	1	2	1	0.0555556		0	0	0	1	1	1	0.0555556		0	0	0		0	1	0.0555556		1	0	0	1	0	0
AD	0	0	0	1	0.0555556		0	1	0	1	2	1	0.0555556		0	0	0	1	1	1	0.0555556		0	0	0		0	1	0.0555556		0	0	1	1	0	0
AD	0	0	0	1	0.0555556		0	1	0	1	2	1	0.0555556		0	0	0	1	1	1	0.0555556		0	0	0		0	1	0.0555556		0	0	1	1	0	0
AD	0	0	0	1	0.0555556		0	1	0	1	2	1	0.0555556		0	0	0	1	1	1	0.0555556		0	0	0		1	0	0		1	0	0	1	0	0
AD	0	0	0	1	0.0555556		0	1	0	1	2	1	0.0555556		0	0	0	1	1	1	0.0555556		0	0	0		0	1	0.0555556		0	0	1	1	0	0
AD	0	0	0	1	0.0555556		0	1	0	1	2	1	0.0555556		0	0	0	1	1	1	0.0555556		0	0	0		0	1	0.0555556		0	0	1	1	0	0
AD	0	0	0	1	0.0555556		0	1	0	1	2	1	0.0555556		0	0	0	1	1	1	0.0555556		0	0	0		0	1	0.0555556		0	0	1	1	0	0
AD	0	0	0	1	0.0555556		0	1	0	1	2	1	0.0555556		0	0	0	1	1	1	0.0555556		0	0	0		0	1	0.0555556		0	0	1	1	0	0
AD	0	0	0	1	0.0555556		0	1	0	1	2	1	0.0555556		0	0	0	1	1	1	0.0555556		0	0	0		0	1	0.0555556		0	0	1	1	0	0
AD	0	0	0	1	0.0555556		0	1	0	1	2	1	0.0555556		0	0	0	1	1	1	0.0555556		0	0	0		0	1	0.0555556		0	0	1	1	0	0
AD	0	0	0	1	0.0555556		0	1	0	1	2	1	0.0555556		0	0	0	1	1	1	0.0555556		0	0	0		0	1	0.0555556		0	0	1	1	0	0
AD	0	0	0	1	0.0555556		0	1	0	1	2	1	0.0555556		0	0	0	1	1	1	0.0555556		0	0	0		0	1	0.0555556		0	0	1	1	0	0
AD	0	0	0	1	0.0555556		0	1	0	1	2	1	0.0555556		0	0	0	1	1	1	0.0555556		0	0	0		0	1	0.0555556		0	0	1	1	0	0
AD	0	0	0	1	0.0555556		0	1	0	1	2	1	0.0555556		0	0	0	1	1	1	0.0555556		0	0	0		0	1	0.0555556		0	0	0	0	1	0.0555556
AD	0	0	0	1	0.0555556		0	1	0	1	2	1	0.0555556		0	0	0	1	1	1	0.0555556		0	0	0		0	1	0.0555556		0	0	1	1	0	0
AD	0	0	0	1	0.0555556		0	1	0	1	2	1	0.0555556		0	0	0	1	1	1	0.0555556		0	0	0		1	0	0		1	0	1	2	0	0
AD	0	0	0	1	0.0555556		0	1	0	1	2	1	0.0555556		0	0	0	1	1	1	0.0555556		0	0	0		0	1	0.0555556		1	0	1	2	0	0
AD	0	0	0	1	0.0555556		0	1	0	1	2	1	0.0555556		0	0	0	1	1	1	0.0555556		0	0	0		0	1	0.0555556		0	0	0	0	1	0.0555556
AD	1	0	1	0	0		1	0	0	1	2	1	0.0555556		0	1	1	0	0	0	0		0	0	0		1	0	0				1	1	0	0
AD	1	0	1	0	0		0	0	1	1	2	1	0.0555556		0	1	1	0	0	0	0		0	0	0		1	0	0				1	1	0	0
AD	1	0	1	0	0		0	0	1	1	2	1	0.0555556		1	0	1	0	0	0	0		0	0	0		1	0	0				1	1	0	0
AD	1	0	1	0	0		0	0	1	1	2	1	0.0555556		1	0	1	0	0	0	0		0	0	0		1	0	0				1	1	0	0
AD	1	0	1	0	0		0	1	0	1	2	1	0.0555556		0	0	0	1	0	1	0.0555556		0	0	0		1	0	0				1	1	0	0
AD	0	0	0	1	0.0555556		0	1	0	1	2	1	0.0555556		0	0	0	1	0	1	0.0555556		0	0	0		0	1	0.0555556				1	1	0	0
AD	1	0	1	0	0		0	0	1	1	2	1	0.0555556		1	0	1	0	0	0	0		0	0	0		1	0	0				1	1	0	0
AD	1	0	1	0	0		0	1	0	1	2	1	0.0555556		1	0	1	0	0	0	0		0	0	0		1	0	0				1	1	0	0
AD	1	0	1	0	0		0	0	1	1	2	1	0.0555556		1	0	1	0	0	0	0		0	0	0		1	0	0				1	1	0	0
AD	0	0	0	1	0.0555556		0	0	1	1	2	1	0.0555556		1	0	1	0	0	0	0		0	0	0		0	1	0.0555556				1	1	0	0
AD	0	0	0	1	0.0555556		0	0	1	1	2	1	0.0555556		0	1	1	0	0	0	0		0	0	0		0	1	0.0555556				1	1	0	0
AD	0	0	0	1	0.0555556		0	1	0	1	2	1	0.0555556		1	0	1	0	0	0	0		0	0	0		0	1	0.0555556				1	1	0	0
AD	1	0	1	0	0		0	0	1	1	2	1	0.0555556		1	0	1	0	0	0	0		0	0	0		1	0	0				1	1	0	0
AD	1	0	1	0	0		0	0	0	1	1	1	0.0555556		1	0	1	0	0	0	0		0	0	0		1	0	0				1	1	0	0
AD	1	0	1	0	0		0	0	1	1	2	1	0.0555556		1	0	1	0	0	0	0		0	0	0		1	0	0				1	1	0	0
AD	0	0	0	1	0.0555556		0	0	1	1	2	1	0.0555556		1	0	1	0	0	0	0		0	0	0		0	1	0.0555556				1	1	0	0
AD	0	0	0	1	0.0555556		0	1	0	1	2	1	0.0555556		1	0	1	0	0	0	0		0	0	0		0	1	0.0555556				1	1	0	0
AD	0	0	0	1	0.0555556		0	1	0	1	2	1	0.0555556		0	1	1	0	0	0	0		0	0	0		0	1	0.0555556				1	1	0	0
AD	0	0	0	1	0.0555556		0	1	0	1	2	1	0.0555556		0	0	0	1	1	1	0.0555556		0	0	0		0	1	0.0555556		0	0	1	1	0	0
AD	0	0	0	1	0.0555556		1	0	0	1	2	1	0.0555556		0	0	0	1	1	1	0.0555556		0	0	0		0	1	0.0555556		1	0	0	1	0	0
AD	0	0	0	1	0.0555556		0	1	0	1	2	1	0.0555556		0	0	0	1	1	1	0.0555556		0	0	0		0	1	0.0555556		0	0	1	1	0	0
AD	0	0	0	1	0.0555556		0	1	0	1	2	1	0.0555556		0	0	0	1	1	1	0.0555556		0	0	0		0	1	0.0555556		0	0	1	1	0	0
AD	0	0	0	1	0.0555556		0	1	0	1	2	1	0.0555556		0	0	0	1	1	1	0.0555556		0	0	0		0	1	0.0555556		0	0	1	1	0	0
AD	0	0	0	1	0.0555556		0	1	0	1	2	1	0.0555556		0	0	0	1	1	1	0.0555556		0	0	0		0	1	0.0555556		0	0	0	0	1	0.0555556
AD	0	0	0	1	0.0555556		0	1	0	1	2	1	0.0555556		0	0	0	1	1	1	0.0555556		0	0	0		0	1	0.0555556		0	0	1	1	0	0
AD	0	0	0	1	0.0555556		0	1	0	1	2	1	0.0555556		0	0	0	1	1	1	0.0555556		0	0	0		0	1	0.0555556		0	0	0	0	1	0.0555556
AD	0	0	0	1	0.0555556		0	1	0	1	2	1	0.0555556		0	0	0	1	1	1	0.0555556		0	0	0		0	1	0.0555556		0	0	0	0	1	0.0555556
AD	0	0	0	1	0.0555556		0	1	0	1	2	1	0.0555556		0	0	0	1	1	1	0.0555556		0	0	0		0	1	0.0555556		0	0	1	1	0	0
AD	0	0	0	1	0.0555556		0	1	0	1	2	1	0.0555556		0	0	0	1	1	1	0.0555556		0	0	0		0	1	0.0555556		0	0	1	1	0	0
AD	0	0	0	1	0.0555556		0	1	0	1	2	1	0.0555556		0	0	0	1	1	1	0.0555556		0	0	0		0	1	0.0555556		0	0	1	1	0	0
AD	0	0	0	1	0.0555556		0	1	0	1	2	1	0.0555556		0	0	0	1	1	1	0.0555556		0	0	0		0	1	0.0555556		0	0	1	1	0	0
AD	0	0	0	1	0.0555556		0	1	0	1	2	1	0.0555556		0	0	0	1	1	1	0.0555556		0	0	0		0	1	0.0555556		0	0	1	1	0	0
AD	0	0	0	1	0.0555556		0	1	0	1	2	1	0.0555556		0	0	0	1	1	1	0.0555556		0	0	0		0	1	0.0555556		0	0	1	1	0	0
AD	0	0	0	1	0.0555556		0	1	0	1	2	1	0.0555556		0	0	0	1	1	1	0.0555556		0	0	0		0	1	0.0555556		0	0	0	0	1	0.0555556
AD	0	0	0	1	0.0555556		0	1	0	1	2	1	0.0555556		0	0	0	1	1	1	0.0555556		0	0	0		0	1	0.0555556		0	0	1	1	0	0
AD	0	0	0	1	0.0555556		0	1	0	1	2	1	0.0555556		0	0	0	1	1	1	0.0555556		0	0	0		0	1	0.0555556		0	0	1	1	0	0
AD	0	0	0	1	0.0555556		0	1	0	1	2	1	0.0555556		0	0	0	1	1	1	0.0555556		0	0	0		0	1	0.0555556		0	0	0	0	1	0.0555556
AD	0	0	0	1	0.0555556		0	1	0	1	2	1	0.0555556		0	0	0	1	1	1	0.0555556		0	0	0		0	1	0.0555556		0	0	1	1	0	0
AD	0	0	0	1	0.0555556		0	1	0	1	2	1	0.0555556		0	0	0	1	1	1	0.0555556		0	0	0		1	0	0		0	0	0	0	1	0.0555556
AD	1	1	2	0	0		0	0	0	1	1	1	0.0555556		0	0	0	1	0	1	0.0555556		0	0	0		0	1	0.0555556				0	0	1	0.0555556
AD	1	1	2	0	0		0	1	0	1	2	1	0.0555556		0	0	0	1	1	1	0.0555556		0	0	0		0	1	0.0555556				0	0	1	0.0555556
AD	1	1	2	0	0		0	1	0	1	2	1	0.0555556		0	0	0	1	1	1	0.0555556		0	0	0		0	1	0.0555556				0	0	1	0.0555556
AD	0	1	1	0	0		0	0	0	1	1	1	0.0555556		0	0	0	1	0	1	0.0555556		0	0	0		0	1	0.0555556				0	0	1	0.0555556
AD	1	1	2	0	0		1	0	0	1	2	1	0.0555556		0	0	0	1	0	1	0.0555556		0	0	0		0	1	0.0555556				0	0	1	0.0555556
AD	0	1	1	0	0		0	1	0	1	2	1	0.0555556		0	0	0	1	1	1	0.0555556		0	0	0		0	1	0.0555556				0	0	1	0.0555556
AD	0	1	1	0	0		0	1	0	1	2	1	0.0555556		0	0	0	1	1	1	0.0555556		0	0	0		0	1	0.0555556				0	0	1	0.0555556
AD	1	0	1	0	0		0	1	0	1	2	1	0.0555556		0	0	0	1	1	1	0.0555556		0	0	0		0	1	0.0555556		0	0	1	1	0	0
AD	0	0	0	1	0.0555556		0	1	0	1	2	1	0.0555556		0	0	0	1	1	1	0.0555556		0	0	0		1	0	0		0	0	1	1	0	0
AD	0	0	0	1	0.0555556		0	1	0	1	2	1	0.0555556		0	0	0	1	1	1	0.0555556		0	0	0		0	1	0.0555556		0	0	1	1	0	0
AD	0	0	0	1	0.0555556		0	1	0	1	2	1	0.0555556		0	0	0	1	1	1	0.0555556		0	0	0		0	1	0.0555556		0	0	1	1	0	0
AD	0	1	1	0	0		0	0	1	1	2	1	0.0555556		0	0	0	1	0	1	0.0555556		0	0	0		0	1	0.0555556		0	0	1	1	0	0
AD	0	1	1	0	0		0	0	1	1	2	1	0.0555556		0	0	0	1	1	1	0.0555556		0	0	0		0	1	0.0555556		0	0	1	1	0	0
AD	0	1	1	0	0		0	0	1	1	2	1	0.0555556		0	0	0	1	1	1	0.0555556		0	0	0		0	1	0.0555556		0	0	1	1	0	0
AD	0	1	1	0	0		0	0	1	1	2	1	0.0555556		0	0	0	1	1	1	0.0555556		0	0	0		0	1	0.0555556		0	0	1	1	0	0
AD	0	1	1	0	0		0	0	1	1	2	1	0.0555556		0	0	0	1	0	1	0.0555556		0	0	0		0	1	0.0555556		0	0	0	0	1	0.0555556
AD	0	0	0	1	0.0555556		0	0	1	1	2	1	0.0555556		0	0	0	1	1	1	0.0555556		0	0	0		1	0	0		1	0	1	2	0	0
AD	0	0	0	1	0.0555556		0	1	0	1	2	1	0.0555556		0	0	0	1	1	1	0.0555556		0	0	0		0	1	0.0555556		1	0	0	1	0	0
AD	1	0	1	0	0		0	1	0	1	2	1	0.0555556		0	0	0	1	1	1	0.0555556		0	0	0		0	1	0.0555556		1	0	1	2	0	0
AD	0	0	0	1	0.0555556		0	1	0	1	2	1	0.0555556		0	0	0	1	1	1	0.0555556		0	0	0		0	1	0.0555556		0	0	1	1	0	0
AD	0	0	0	1	0.0555556		0	1	0	1	2	1	0.0555556		0	0	0	1	1	1	0.0555556		0	0	0		0	1	0.0555556		0	0	1	1	0	0
AD	0	0	0	1	0.0555556		0	1	0	1	2	1	0.0555556		0	0	0	1	1	1	0.0555556		0	0	0		0	1	0.0555556		0	0	1	1	0	0
AD	0	0	0	1	0.0555556		0	1	0	1	2	1	0.0555556		0	0	0	1	0	1	0.0555556		0	0	0		0	1	0.0555556		1	0	1	2	0	0
AD	1	0	1	0	0		0	1	0	1	2	1	0.0555556		0	1	1	0	0	0	0		0	0	0		0	1	0.0555556		1	0	1	2	0	0
AD	1	0	1	0	0		0	1	0	1	2	1	0.0555556		0	1	1	0	0	0	0		0	0	0		0	1	0.0555556		1	0	1	2	0	0
AD	0	0	0	1	0.0555556		0	1	0	1	2	1	0.0555556		0	1	1	0	0	0	0		0	0	0		0	1	0.0555556		0	0	1	1	0	0
AD	0	0	0	1	0.0555556		0	1	0	1	2	1	0.0555556		0	1	1	0	0	0	0		0	0	0		1	0	0		0	0	1	1	0	0
AD	0	0	0	1	0.0555556		0	1	0	1	2	1	0.0555556		0	1	1	0	0	0	0		0	0	0		0	1	0.0555556		0	0	1	1	0	0
AD	0	0	0	1	0.0555556		0	1	0	1	2	1	0.0555556		0	1	1	0	0	0	0		0	0	0		0	1	0.0555556		0	0	1	1	0	0
AD	0	0	0	1	0.0555556		0	1	0	1	2	1	0.0555556		0	1	1	0	1	1	0.0555556		0	0	0		0	1	0.0555556		0	0	1	1	0	0
AD	0	0	0	1	0.0555556		0	1	0	1	2	1	0.0555556		0	1	1	0	1	1	0.0555556		0	0	0		0	1	0.0555556		0	0	1	1	0	0
AD	0	0	0	1	0.0555556		0	1	0	1	2	1	0.0555556		0	1	1	0	1	1	0.0555556		0	0	0		0	1	0.0555556		0	0	1	1	0	0
AD	0	0	0	1	0.0555556		0	1	0	1	2	1	0.0555556		0	0	0	1	1	1	0.0555556		0	0	0		0	1	0.0555556		0	0	1	1	0	0
AD	1	0	1	0	0		0	1	0	1	2	1	0.0555556		0	0	0	1	1	1	0.0555556		0	0	0		0	1	0.0555556		1	0	1	2	0	0
AD	1	0	1	0	0		0	1	0	1	2	1	0.0555556		0	0	0	1	1	1	0.0555556		0	0	0		0	1	0.0555556		0	0	1	1	0	0
AD	0	0	0	1	0.0555556		0	1	0	1	2	1	0.0555556		0	0	0	1	1	1	0.0555556		0	0	0		0	1	0.0555556		0	0	1	1	0	0
AD	0	0	0	1	0.0555556		0	1	0	1	2	1	0.0555556		0	0	0	1	1	1	0.0555556		0	0	0		0	1	0.0555556		0	0	1	1	0	0
AD	0	0	0	1	0.0555556		0	1	0	1	2	1	0.0555556		0	0	0	1	1	1	0.0555556		0	0	0		0	1	0.0555556		0	0	1	1	0	0
AD	0	0	0	1	0.0555556		0	1	0	1	2	1	0.0555556		0	0	0	1	1	1	0.0555556		0	0	0		0	1	0.0555556		0	0	1	1	0	0
AD	0	0	0	1	0.0555556		0	1	0	1	2	1	0.0555556		0	0	0	1	1	1	0.0555556		0	0	0		0	1	0.0555556		0	0	1	1	0	0
AD	0	0	0	1	0.0555556		0	1	0	1	2	1	0.0555556		0	0	0	1	1	1	0.0555556		0	0	0		0	1	0.0555556		0	0	1	1	0	0
AD	1	0	1	0	0		0	0	1	1	2	1	0.0555556		0	0	0	1	0	1	0.0555556		0	0	0		1	0	0		1	0	1	2	0	0
AD	1	0	1	0	0		0	0	1	1	2	1	0.0555556		0	0	0	1	1	1	0.0555556		0	0	0		1	0	0				1	1	0	0
AD	1	0	1	0	0		0	0	1	1	2	1	0.0555556		0	0	0	1	0	1	0.0555556		0	0	0		1	0	0				1	1	0	0
AD	0	0	0	1	0.0555556		0	0	1	1	2	1	0.0555556		0	0	0	1	0	1	0.0555556		0	0	0		0	1	0.0555556				1	1	0	0
AD	0	0	0	1	0.0555556		0	0	1	1	2	1	0.0555556		0	0	0	1	1	1	0.0555556		0	0	0		0	1	0.0555556				1	1	0	0
AD	1	0	1	0	0		0	0	1	1	2	1	0.0555556		0	0	0	1	0	1	0.0555556		0	0	0		0	1	0.0555556				1	1	0	0
AD	1	0	1	0	0		0	0	1	1	2	1	0.0555556		0	0	0	1	0	1	0.0555556		0	0	0		0	1	0.0555556				1	1	0	0
AD	0	0	0	1	0.0555556		0	0	1	1	2	1	0.0555556		0	0	0	1	0	1	0.0555556		0	0	0		1	0	0				1	1	0	0
AD	0	0	0	1	0.0555556		0	0	1	1	2	1	0.0555556		0	0	0	1	0	1	0.0555556		0	0	0		0	1	0.0555556				1	1	0	0
AD	1	0	1	0	0		1	0	0	1	2	1	0.0555556		0	0	0	1	0	1	0.0555556		0	0	0		0	1	0.0555556				1	1	0	0
AD	0	0	0	1	0.0555556		1	0	0	1	2	1	0.0555556		0	0	0	1	0	1	0.0555556		0	0	0		1	0	0				1	1	0	0
AD	1	0	1	0	0		1	0	0	1	2	1	0.0555556		0	0	0	1	1	1	0.0555556		0	0	0		1	0	0				1	1	0	0
AD	0	0	0	1	0.0555556		1	0	0	1	2	1	0.0555556		0	0	0	1	0	1	0.0555556		0	0	0		0	1	0.0555556				1	1	0	0
AD	0	0	0	1	0.0555556		0	0	1	1	2	1	0.0555556		0	0	0	1	0	1	0.0555556		0	0	0		1	0	0				1	1	0	0
AD	0	0	0	1	0.0555556		1	0	0	1	2	1	0.0555556		0	1	1	0	0	0	0		0	0	0		0	1	0.0555556				1	1	0	0
AD	0	0	0	1	0.0555556		0	1	0	1	2	1	0.0555556		0	1	1	0	1	1	0.0555556		0	0	0		1	0	0		0	0	1	1	0	0
AD	0	0	0	1	0.0555556		0	1	0	1	2	1	0.0555556		0	1	1	0	1	1	0.0555556		0	0	0		1	0	0		0	0	1	1	0	0
AD	1	0	1	0	0		0	0	1	1	2	1	0.0555556		0	1	1	0	1	1	0.0555556		0	0	0		1	0	0		0	0	1	1	0	0
AD	1	0	1	0	0		0	1	0	1	2	1	0.0555556		0	1	1	0	1	1	0.0555556		0	0	0		1	0	0		0	0	1	1	0	0
AD	1	0	1	0	0		0	1	0	1	2	1	0.0555556		0	1	1	0	1	1	0.0555556		0	0	0		1	0	0		0	0	0	0	1	0.0555556
AD	0	0	0	1	0.0555556		0	1	0	1	2	1	0.0555556		0	1	1	0	1	1	0.0555556		0	0	0		1	0	0		0	0	0	0	1	0.0555556
AD	0	0	0	1	0.0555556		1	0	0	1	2	1	0.0555556		0	1	1	0	1	1	0.0555556		0	0	0		1	0	0		0	0	0	0	1	0.0555556
AD	0	0	0	1	0.0555556		0	1	0	1	2	1	0.0555556		0	1	1	0	1	1	0.0555556		0	0	0		0	1	0.0555556		1	0	1	2	0	0
AD	0	0	0	1	0.0555556		0	1	0	1	2	1	0.0555556		0	1	1	0	1	1	0.0555556		0	0	0		0	1	0.0555556		0	0	1	1	0	0
AD	1	0	1	0	0		0	1	0	1	2	1	0.0555556		0	1	1	0	1	1	0.0555556		0	0	0		1	0	0		0	1	1	2	0	0
AD	0	0	0	1	0.0555556		0	1	0	1	2	1	0.0555556		0	1	1	0	1	1	0.0555556		0	0	0		0	1	0.0555556		0	0	0	0	1	0.0555556
AD	0	0	0	1	0.0555556		0	1	0	1	2	1	0.0555556		0	1	1	0	1	1	0.0555556		0	0	0		0	1	0.0555556		0	0	1	1	0	0
AD	0	0	0	1	0.0555556		0	0	1	1	2	1	0.0555556		0	1	1	0	1	1	0.0555556		0	0	0		0	1	0.0555556		1	0	1	2	0	0
AD	0	0	0	1	0.0555556		0	1	0	1	2	1	0.0555556		0	1	1	0	1	1	0.0555556		0	0	0		0	1	0.0555556		0	0	1	1	0	0
AD	0	0	0	1	0.0555556		0	1	0	1	2	1	0.0555556		0	1	1	0	1	1	0.0555556		0	0	0		0	1	0.0555556		0	0	1	1	0	0
AD	1	0	1	0	0		0	1	0	1	2	1	0.0555556		0	1	1	0	1	1	0.0555556		0	0	0		1	0	0		0	0	0	0	1	0.0555556
AD	0	0	0	1	0.0555556		0	1	0	1	2	1	0.0555556		0	1	1	0	1	1	0.0555556		0	0	0		0	1	0.0555556		0	0	1	1	0	0

## Sheet: MPI Total
Municipality	Years of Schooling	School attendance	Child Mortality	Electricity	Sanitation	Drinking Water	Floor	Cooking Fuel	Assets	MPI Deprived Households	MPI
PED	0.166667	0.166667	0	0	0.0555556	0.0555556	0	0.0555556	0	1	0.5
PED	0.166667	0.166667	0.166667	0	0.0555556	0.0555556	0	0.0555556	0.0555556	1	0.722222
PED	0.166667	0.166667	0.166667	0	0.0555556	0.0555556	0	0.0555556	0	1	0.666667
PED	0.166667	0	0.166667	0	0.0555556	0.0555556	0	0.0555556	0.0555556	1	0.555556
PED	0.166667	0.166667	0	0	0.0555556	0.0555556	0	0.0555556	0.0555556	1	0.555556
PED	0.166667	0.166667	0.166667	0	0.0555556	0.0555556	0	0.0555556	0	1	0.666667
PED	0.166667	0.166667	0	0	0.0555556	0.0555556	0	0.0555556	0.0555556	1	0.555556
PED	0.166667	0.166667	0.166667	0	0.0555556	0.0555556	0	0.0555556	0.0555556	1	0.722222
PED	0.166667	0.166667	0.166667	0	0.0555556	0.0555556	0	0.0555556	0	1	0.666667
PED	0.166667	0	0.166667	0	0.0555556	0.0555556	0	0.0555556	0	1	0.5
PED	0.166667	0.166667	0	0	0.0555556	0.0555556	0	0.0555556	0	1	0.5
PED	0.166667	0.166667	0.166667	0	0.0555556	0.0555556	0	0.0555556	0	1	0.666667
PED	0.166667	0	0.166667	0	0.0555556	0.0555556	0	0	0	1	0.444444
PED	0.166667	0.166667	0.166667	0	0.0555556	0.0555556	0	0.0555556	0	1	0.666667
PED	0.166667	0.166667	0.166667	0	0.0555556	0.0555556	0	0	0	1	0.611111
PED	0.166667	0.166667	0.166667	0	0.0555556	0.0555556	0	0.0555556	0	1	0.666667
PED	0.166667	0.166667	0.166667	0	0.0555556	0.0555556	0	0.0555556	0	1	0.666667
PED	0.166667	0.166667	0.166667	0	0.0555556	0.0555556	0	0.0555556	0	1	0.666667
PED	0.166667	0	0	0	0.0555556	0.0555556	0	0.0555556	0	1	0.333333
PED	0.166667	0	0.166667	0	0.0555556	0.0555556	0	0.0555556	0	1	0.5
PED	0.166667	0.166667	0.166667	0	0.0555556	0.0555556	0	0.0555556	0	1	0.666667
PED	0.166667	0.166667	0.166667	0	0.0555556	0.0555556	0	0.0555556	0	1	0.666667
PED	0.166667	0	0	0	0.0555556	0.0555556	0	0.0555556	0.0555556	1	0.388889
PED	0.166667	0.166667	0	0	0.0555556	0.0555556	0	0.0555556	0.0555556	1	0.555556
PED	0.166667	0	0.166667	0	0.0555556	0.0555556	0	0.0555556	0	1	0.5
PED	0.166667	0.166667	0.166667	0	0.0555556	0.0555556	0	0.0555556	0.0555556	1	0.722222
PED	0.166667	0.166667	0.166667	0	0.0555556	0.0555556	0	0.0555556	0.0555556	1	0.722222
PED	0.166667	0.166667	0.166667	0	0.0555556	0.0555556	0	0	0	1	0.611111
PED	0.166667	0.166667	0.166667	0	0.0555556	0.0555556	0	0	0	1	0.611111
PED	0.166667	0.166667	0.166667	0	0.0555556	0.0555556	0	0	0	1	0.611111
PED	0.166667	0.166667	0.166667	0	0.0555556	0.0555556	0.0555556	0.0555556	0	1	0.722222
PED	0.166667	0.166667	0.166667	0.0555556	0.0555556	0.0555556	0	0.0555556	0	1	0.722222
PED	0.166667	0	0	0	0.0555556	0.0555556	0	0	0	0	0.277778
PED	0.166667	0.166667	0.166667	0.0555556	0.0555556	0.0555556	0	0.0555556	0.0555556	1	0.777778
PED	0.166667	0.166667	0.166667	0	0.0555556	0.0555556	0	0.0555556	0	1	0.666667
PED	0.166667	0.166667	0	0.0555556	0.0555556	0.0555556	0	0.0555556	0	1	0.555556
PED	0.166667	0.166667	0	0.0555556	0.0555556	0.0555556	0	0.0555556	0	1	0.555556
PED	0.166667	0.166667	0.166667	0.0555556	0.0555556	0.0555556	0	0.0555556	0	1	0.722222
PED	0.166667	0	0.166667	0	0.0555556	0.0555556	0	0.0555556	0	1	0.5
PED	0.166667	0.166667	0.166667	0.0555556	0.0555556	0.0555556	0	0.0555556	0	1	0.722222
PED	0.166667	0	0.166667	0.0555556	0.0555556	0.0555556	0	0.0555556	0	1	0.555556
PED	0.166667	0	0.166667	0.0555556	0.0555556	0.0555556	0	0.0555556	0	1	0.555556
PED	0.166667	0.166667	0	0.0555556	0.0555556	0.0555556	0	0.0555556	0	1	0.555556
PED	0.166667	0.166667	0.166667	0.0555556	0.0555556	0.0555556	0	0.0555556	0	1	0.722222
PED	0.166667	0	0.166667	0.0555556	0.0555556	0.0555556	0	0.0555556	0.0555556	1	0.611111
PED	0.166667	0.166667	0.166667	0.0555556	0.0555556	0.0555556	0	0	0.0555556	1	0.722222
PED	0.166667	0.166667	0.166667	0	0.0555556	0.0555556	0	0	0.0555556	1	0.666667
PED	0	0.166667	0	0.0555556	0.0555556	0.0555556	0	0.0555556	0	1	0.388889
PED	0.166667	0.166667	0.166667	0.0555556	0.0555556	0.0555556	0	0.0555556	0	1	0.722222
PED	0.166667	0.166667	0.166667	0.0555556	0.0555556	0.0555556	0	0.0555556	0.0555556	1	0.777778
PED	0.166667	0	0	0.0555556	0.0555556	0.0555556	0	0	0.0555556	1	0.388889
PED	0.166667	0.166667	0.166667	0.0555556	0.0555556	0	0	0	0	1	0.611111
PED	0	0.166667	0	0.0555556	0.0555556	0.0555556	0	0	0	1	0.333333
PED	0.166667	0.166667	0.166667	0.0555556	0.0555556	0.0555556	0.0555556	0	0	1	0.722222
PED	0	0.166667	0.166667	0.0555556	0.0555556	0.0555556	0.0555556	0	0	1	0.555556
PED	0.166667	0.166667	0.166667	0.0555556	0.0555556	0.0555556	0.0555556	0	0	1	0.722222
PED	0.166667	0.166667	0.166667	0.0555556	0.0555556	0.0555556	0.0555556	0	0	1	0.722222
PED	0.166667	0	0.166667	0	0.0555556	0.0555556	0	0	0.0555556	1	0.5
PED	0.166667	0.166667	0	0.0555556	0.0555556	0.0555556	0	0.0555556	0	1	0.555556
PED	0.166667	0.166667	0	0.0555556	0.0555556	0.0555556	0	0	0.0555556	1	0.555556
PED	0.166667	0.166667	0.166667	0	0.0555556	0.0555556	0	0.0555556	0	1	0.666667
PED	0.166667	0.166667	0	0	0.0555556	0.0555556	0	0.0555556	0	1	0.5
PED	0.166667	0.166667	0.166667	0	0.0555556	0.0555556	0	0.0555556	0	1	0.666667
PED	0.166667	0.166667	0	0	0.0555556	0.0555556	0	0.0555556	0	1	0.5
PED	0.166667	0.166667	0	0	0.0555556	0.0555556	0	0.0555556	0	1	0.5
PED	0.166667	0.166667	0.166667	0	0.0555556	0.0555556	0	0.0555556	0	1	0.666667
PED	0.166667	0.166667	0	0	0.0555556	0.0555556	0	0.0555556	0	1	0.5
PED	0.166667	0.166667	0.166667	0	0.0555556	0.0555556	0	0.0555556	0	1	0.666667
PED	0.166667	0.166667	0	0	0.0555556	0.0555556	0	0.0555556	0	1	0.5
PED	0.166667	0.166667	0.166667	0	0.0555556	0.0555556	0	0.0555556	0.0555556	1	0.722222
PED	0.166667	0.166667	0	0	0.0555556	0.0555556	0	0	0	1	0.444444
PED	0.166667	0.166667	0.166667	0	0.0555556	0.0555556	0	0	0	1	0.611111
PED	0.166667	0.166667	0	0	0.0555556	0.0555556	0	0	0	1	0.444444
PED	0.166667	0.166667	0.166667	0	0.0555556	0.0555556	0	0	0	1	0.611111
PED	0.166667	0.166667	0.166667	0	0.0555556	0.0555556	0	0.0555556	0.0555556	1	0.722222
PED	0.166667	0	0	0	0.0555556	0.0555556	0	0.0555556	0.0555556	1	0.388889
PED	0.166667	0.166667	0.166667	0	0.0555556	0.0555556	0	0.0555556	0	1	0.666667
PED	0.166667	0.166667	0.166667	0	0.0555556	0.0555556	0	0.0555556	0	1	0.666667
PED	0.166667	0.166667	0	0	0.0555556	0.0555556	0	0.0555556	0	1	0.5
PED	0.166667	0.166667	0.166667	0	0.0555556	0.0555556	0	0.0555556	0	1	0.666667
PED	0.166667	0.166667	0.166667	0	0.0555556	0.0555556	0	0.0555556	0	1	0.666667
PED	0.166667	0.166667	0.166667	0	0.0555556	0.0555556	0	0.0555556	0	1	0.666667
PED	0.166667	0.166667	0.166667	0	0.0555556	0.0555556	0	0.0555556	0	1	0.666667
PED	0.166667	0	0.166667	0	0.0555556	0.0555556	0	0.0555556	0.0555556	1	0.555556
PED	0.166667	0.166667	0.166667	0	0.0555556	0.0555556	0	0.0555556	0.0555556	1	0.722222
PED	0.166667	0.166667	0.166667	0	0.0555556	0.0555556	0	0.0555556	0	1	0.666667
PED	0.166667	0.166667	0.166667	0	0.0555556	0.0555556	0	0.0555556	0	1	0.666667
PED	0.166667	0.166667	0.166667	0	0.0555556	0.0555556	0	0.0555556	0	1	0.666667
PED	0.166667	0.166667	0.166667	0	0.0555556	0.0555556	0	0.0555556	0.0555556	1	0.722222
PED	0.166667	0.166667	0.166667	0	0.0555556	0.0555556	0	0.0555556	0.0555556	1	0.722222
PED	0.166667	0.166667	0.166667	0	0.0555556	0.0555556	0	0.0555556	0	1	0.666667
PED	0.166667	0.166667	0.166667	0	0.0555556	0.0555556	0	0.0555556	0	1	0.666667
PED	0.166667	0	0.166667	0	0.0555556	0.0555556	0	0.0555556	0.0555556	1	0.555556
PED	0.166667	0	0	0	0.0555556	0.0555556	0	0.0555556	0	1	0.333333
PED	0.166667	0	0.166667	0	0.0555556	0.0555556	0	0.0555556	0	1	0.5
PED	0.166667	0.166667	0	0	0.0555556	0.0555556	0	0.0555556	0	1	0.5
PED	0.166667	0.166667	0.166667	0	0.0555556	0.0555556	0	0.0555556	0	1	0.666667
PED	0.166667	0.166667	0.166667	0	0.0555556	0.0555556	0	0.0555556	0	1	0.666667
TUC	0.166667	0.166667	0.166667	0	0.0555556	0.0555556	0	0.0555556	0	1	0.666667
TUC	0.166667	0.166667	0.166667	0	0.0555556	0.0555556	0	0.0555556	0	1	0.666667
TUC	0.166667	0	0.166667	0	0.0555556	0.0555556	0	0.0555556	0	1	0.5
TUC	0.166667	0.166667	0.166667	0	0.0555556	0.0555556	0	0.0555556	0	1	0.666667
TUC	0.166667	0.166667	0.166667	0	0.0555556	0.0555556	0	0.0555556	0	1	0.666667
TUC	0.166667	0.166667	0.166667	0	0.0555556	0.0555556	0	0.0555556	0	1	0.666667
TUC	0.166667	0.166667	0.166667	0	0.0555556	0.0555556	0	0.0555556	0	1	0.666667
TUC	0.166667	0.166667	0.166667	0	0.0555556	0.0555556	0	0.0555556	0	1	0.666667
TUC	0.166667	0.166667	0.166667	0	0.0555556	0.0555556	0	0.0555556	0	1	0.666667
TUC	0.166667	0.166667	0.166667	0	0.0555556	0.0555556	0	0.0555556	0	1	0.666667
TUC	0.166667	0.166667	0	0	0.0555556	0.0555556	0	0.0555556	0	1	0.5
TUC	0.166667	0.166667	0	0	0.0555556	0.0555556	0	0.0555556	0	1	0.5
TUC	0.166667	0.166667	0.166667	0	0.0555556	0.0555556	0	0.0555556	0	1	0.666667
TUC	0.166667	0.166667	0	0	0.0555556	0.0555556	0	0.0555556	0	1	0.5
TUC	0.166667	0	0	0	0.0555556	0.0555556	0	0	0	0	0.277778
TUC	0.166667	0.166667	0.166667	0	0.0555556	0.0555556	0	0.0555556	0	1	0.666667
TUC	0.166667	0.166667	0	0	0.0555556	0.0555556	0	0.0555556	0	1	0.5
TUC	0.166667	0.166667	0.166667	0	0.0555556	0.0555556	0	0.0555556	0.0555556	1	0.722222
TUC	0.166667	0	0.166667	0	0.0555556	0.0555556	0	0.0555556	0	1	0.5
TUC	0.166667	0.166667	0.166667	0	0.0555556	0.0555556	0	0.0555556	0	1	0.666667
TUC	0.166667	0.166667	0.166667	0	0.0555556	0.0555556	0	0.0555556	0	1	0.666667
TUC	0.166667	0	0.166667	0	0.0555556	0.0555556	0	0.0555556	0	1	0.5
TUC	0.166667	0.166667	0.166667	0	0.0555556	0.0555556	0	0.0555556	0	1	0.666667
TUC	0.166667	0.166667	0.166667	0	0.0555556	0.0555556	0	0.0555556	0	1	0.666667
TUC	0.166667	0.166667	0.166667	0	0.0555556	0.0555556	0	0.0555556	0	1	0.666667
TUC	0.166667	0.166667	0	0	0.0555556	0.0555556	0	0.0555556	0	1	0.5
TUC	0.166667	0.166667	0.166667	0	0.0555556	0.0555556	0	0.0555556	0	1	0.666667
TUC	0.166667	0.166667	0	0.0555556	0.0555556	0.0555556	0	0.0555556	0	1	0.555556
TUC	0.166667	0.166667	0.166667	0	0.0555556	0.0555556	0	0.0555556	0	1	0.666667
TUC	0.166667	0.166667	0.166667	0	0.0555556	0.0555556	0	0.0555556	0	1	0.666667
TUC	0.166667	0.166667	0	0	0.0555556	0.0555556	0	0.0555556	0	1	0.5
TUC	0.166667	0.166667	0.166667	0	0.0555556	0.0555556	0	0.0555556	0	1	0.666667
TUC	0.166667	0.166667	0.166667	0	0.0555556	0.0555556	0	0.0555556	0	1	0.666667
TUC	0.166667	0.166667	0.166667	0	0.0555556	0.0555556	0	0.0555556	0	1	0.666667
TUC	0.166667	0.166667	0.166667	0	0.0555556	0.0555556	0	0.0555556	0	1	0.666667
TUC	0.166667	0.166667	0.166667	0.0555556	0.0555556	0.0555556	0	0.0555556	0	1	0.722222
TUC	0.166667	0.166667	0.166667	0.0555556	0.0555556	0.0555556	0	0.0555556	0	1	0.722222
TUC	0.166667	0.166667	0	0.0555556	0.0555556	0.0555556	0	0.0555556	0	1	0.555556
TUC	0.166667	0.166667	0.166667	0.0555556	0.0555556	0.0555556	0	0.0555556	0	1	0.722222
TUC	0.166667	0.166667	0.166667	0	0.0555556	0.0555556	0	0.0555556	0	1	0.666667
TUC	0.166667	0.166667	0.166667	0	0.0555556	0.0555556	0	0.0555556	0	1	0.666667
TUC	0.166667	0.166667	0.166667	0	0.0555556	0.0555556	0	0.0555556	0	1	0.666667
TUC	0.166667	0.166667	0	0.0555556	0.0555556	0.0555556	0	0.0555556	0	1	0.555556
TUC	0.166667	0.166667	0.166667	0.0555556	0.0555556	0.0555556	0	0.0555556	0	1	0.722222
TUC	0.166667	0.166667	0.166667	0.0555556	0.0555556	0.0555556	0	0.0555556	0	1	0.722222
TUC	0.166667	0.166667	0	0.0555556	0.0555556	0.0555556	0	0.0555556	0.0555556	1	0.611111
TUC	0.166667	0.166667	0.166667	0.0555556	0.0555556	0.0555556	0	0.0555556	0.0555556	1	0.777778
TUC	0.166667	0.166667	0.166667	0	0.0555556	0.0555556	0	0.0555556	0	1	0.666667
TUC	0.166667	0.166667	0	0	0.0555556	0.0555556	0	0.0555556	0	1	0.5
TUC	0.166667	0.166667	0	0	0.0555556	0.0555556	0	0.0555556	0	1	0.5
TUC	0.166667	0.166667	0	0	0.0555556	0.0555556	0	0.0555556	0	1	0.5
TUC	0.166667	0.166667	0	0	0.0555556	0.0555556	0	0.0555556	0	1	0.5
TUC	0.166667	0.166667	0.166667	0	0.0555556	0.0555556	0	0	0.0555556	1	0.666667
TUC	0	0.166667	0.166667	0	0.0555556	0.0555556	0	0	0.0555556	1	0.5
TUC	0.166667	0.166667	0.166667	0	0.0555556	0.0555556	0	0	0.0555556	1	0.666667
TUC	0.166667	0.166667	0	0	0.0555556	0.0555556	0	0	0.0555556	1	0.5
TUC	0	0.166667	0.166667	0	0.0555556	0.0555556	0	0.0555556	0	1	0.5
TUC	0.166667	0.166667	0	0.0555556	0.0555556	0.0555556	0	0.0555556	0.0555556	1	0.611111
TUC	0.166667	0.166667	0	0	0.0555556	0.0555556	0	0.0555556	0.0555556	1	0.555556
TUC	0.166667	0.166667	0.166667	0.0555556	0.0555556	0.0555556	0	0	0	1	0.666667
TUC	0.166667	0.166667	0	0.0555556	0.0555556	0.0555556	0	0	0	1	0.5
TUC	0.166667	0	0.166667	0.0555556	0.0555556	0.0555556	0	0	0.0555556	1	0.555556
TUC	0.166667	0	0.166667	0.0555556	0.0555556	0.0555556	0	0	0.0555556	1	0.555556
TUC	0.166667	0.166667	0.166667	0.0555556	0.0555556	0.0555556	0	0.0555556	0.0555556	1	0.777778
TUC	0.166667	0.166667	0	0.0555556	0.0555556	0.0555556	0	0	0.0555556	1	0.555556
TUC	0.166667	0.166667	0.166667	0.0555556	0.0555556	0.0555556	0	0.0555556	0.0555556	1	0.777778
TUC	0.166667	0	0.166667	0.0555556	0.0555556	0.0555556	0	0	0.0555556	1	0.555556
TUC	0.166667	0.166667	0.166667	0.0555556	0.0555556	0.0555556	0	0	0.0555556	1	0.722222
TUC	0.166667	0.166667	0.166667	0	0.0555556	0.0555556	0	0	0.0555556	1	0.666667
TUC	0.166667	0.166667	0	0.0555556	0.0555556	0	0.0555556	0.0555556	0.0555556	1	0.611111
TUC	0.166667	0.166667	0	0.0555556	0.0555556	0	0.0555556	0.0555556	0.0555556	1	0.611111
TUC	0.166667	0.166667	0.166667	0.0555556	0.0555556	0	0.0555556	0.0555556	0.0555556	1	0.777778
TUC	0.166667	0.166667	0.166667	0.0555556	0.0555556	0	0.0555556	0.0555556	0	1	0.722222
TUC	0.166667	0.166667	0.166667	0.0555556	0.0555556	0	0.0555556	0.0555556	0.0555556	1	0.777778
TUC	0.166667	0.166667	0	0.0555556	0.0555556	0	0	0.0555556	0.0555556	1	0.555556
TUC	0.166667	0.166667	0.166667	0.0555556	0.0555556	0	0	0.0555556	0.0555556	1	0.722222
TUC	0.166667	0.166667	0.166667	0.0555556	0.0555556	0	0.0555556	0.0555556	0.0555556	1	0.777778
TUC	0.166667	0.166667	0.166667	0.0555556	0.0555556	0	0.0555556	0.0555556	0.0555556	1	0.777778
TUC	0.166667	0.166667	0.166667	0.0555556	0.0555556	0	0.0555556	0	0	1	0.666667
TUC	0.166667	0.166667	0	0.0555556	0.0555556	0	0.0555556	0.0555556	0	1	0.555556
TUC	0.166667	0.166667	0	0.0555556	0.0555556	0	0.0555556	0.0555556	0.0555556	1	0.611111
TUC	0.166667	0.166667	0	0.0555556	0.0555556	0	0	0.0555556	0	1	0.5
TUC	0.166667	0.166667	0.166667	0.0555556	0.0555556	0	0	0.0555556	0.0555556	1	0.722222
TUC	0.166667	0.166667	0	0.0555556	0.0555556	0	0	0	0.0555556	1	0.5
TUC	0.166667	0.166667	0.166667	0.0555556	0.0555556	0	0.0555556	0.0555556	0.0555556	1	0.777778
TUC	0.166667	0.166667	0.166667	0.0555556	0.0555556	0	0.0555556	0.0555556	0.0555556	1	0.777778
TUC	0	0.166667	0.166667	0.0555556	0.0555556	0	0.0555556	0.0555556	0.0555556	1	0.611111
TUC	0	0.166667	0	0.0555556	0.0555556	0	0.0555556	0.0555556	0.0555556	1	0.444444
TUC	0	0.166667	0	0.0555556	0.0555556	0	0.0555556	0	0.0555556	1	0.388889
TUC	0.166667	0.166667	0	0.0555556	0.0555556	0	0.0555556	0.0555556	0.0555556	1	0.611111
AD	0.166667	0.166667	0.166667	0.0555556	0.0555556	0.0555556	0	0.0555556	0.0555556	1	0.777778
AD	0.166667	0.166667	0	0	0.0555556	0.0555556	0	0.0555556	0.0555556	1	0.555556
AD	0.166667	0.166667	0	0	0.0555556	0.0555556	0	0.0555556	0.0555556	1	0.555556
AD	0.166667	0.166667	0.166667	0	0.0555556	0.0555556	0	0.0555556	0	1	0.666667
AD	0.166667	0.166667	0.166667	0	0.0555556	0.0555556	0	0.0555556	0	1	0.666667
AD	0.166667	0.166667	0	0	0.0555556	0.0555556	0	0.0555556	0	1	0.5
AD	0.166667	0.166667	0	0	0.0555556	0.0555556	0	0.0555556	0	1	0.5
AD	0.166667	0.166667	0.166667	0	0.0555556	0.0555556	0	0.0555556	0	1	0.666667
AD	0.166667	0.166667	0.166667	0	0.0555556	0.0555556	0	0.0555556	0	1	0.666667
AD	0.166667	0.166667	0	0	0.0555556	0.0555556	0	0.0555556	0	1	0.5
AD	0.166667	0.166667	0.166667	0	0.0555556	0.0555556	0	0.0555556	0	1	0.666667
AD	0.166667	0.166667	0.166667	0	0.0555556	0.0555556	0	0.0555556	0	1	0.666667
AD	0.166667	0.166667	0	0	0.0555556	0.0555556	0	0.0555556	0.0555556	1	0.555556
AD	0.166667	0.166667	0.166667	0	0.0555556	0.0555556	0	0.0555556	0	1	0.666667
AD	0.166667	0.166667	0.166667	0	0.0555556	0.0555556	0	0.0555556	0	1	0.666667
AD	0.166667	0.166667	0.166667	0	0.0555556	0.0555556	0	0.0555556	0	1	0.666667
AD	0.166667	0.166667	0.166667	0	0.0555556	0.0555556	0	0.0555556	0	1	0.666667
AD	0.166667	0.166667	0.166667	0	0.0555556	0.0555556	0	0.0555556	0	1	0.666667
AD	0.166667	0.166667	0.166667	0	0.0555556	0.0555556	0	0.0555556	0	1	0.666667
AD	0.166667	0.166667	0.166667	0	0.0555556	0.0555556	0	0.0555556	0	1	0.666667
AD	0.166667	0.166667	0	0	0.0555556	0.0555556	0	0.0555556	0	1	0.5
AD	0.166667	0.166667	0	0	0.0555556	0.0555556	0	0.0555556	0	1	0.5
AD	0.166667	0	0	0	0.0555556	0.0555556	0	0.0555556	0	1	0.333333
AD	0.166667	0.166667	0.166667	0	0.0555556	0.0555556	0	0.0555556	0	1	0.666667
AD	0.166667	0.166667	0	0	0.0555556	0.0555556	0	0.0555556	0	1	0.5
AD	0.166667	0.166667	0	0	0.0555556	0.0555556	0	0.0555556	0	1	0.5
AD	0.166667	0.166667	0.166667	0.0555556	0.0555556	0.0555556	0	0.0555556	0	1	0.722222
AD	0.166667	0.166667	0.166667	0.0555556	0.0555556	0.0555556	0	0.0555556	0	1	0.722222
AD	0.166667	0.166667	0.166667	0.0555556	0.0555556	0.0555556	0	0	0.0555556	1	0.722222
AD	0.166667	0.166667	0.166667	0	0.0555556	0.0555556	0	0.0555556	0	1	0.666667
AD	0.166667	0	0.166667	0	0.0555556	0.0555556	0	0.0555556	0	1	0.5
AD	0.166667	0.166667	0.166667	0	0.0555556	0.0555556	0	0.0555556	0	1	0.666667
AD	0.166667	0.166667	0	0	0.0555556	0.0555556	0	0.0555556	0	1	0.5
AD	0.166667	0.166667	0	0	0.0555556	0.0555556	0	0.0555556	0	1	0.5
AD	0.166667	0.166667	0.166667	0	0.0555556	0.0555556	0	0.0555556	0	1	0.666667
AD	0.166667	0.166667	0.166667	0	0.0555556	0.0555556	0	0.0555556	0	1	0.666667
AD	0.166667	0.166667	0.166667	0	0.0555556	0.0555556	0	0.0555556	0	1	0.666667
AD	0.166667	0.166667	0.166667	0	0.0555556	0.0555556	0	0.0555556	0	1	0.666667
AD	0.166667	0.166667	0.166667	0	0.0555556	0.0555556	0	0.0555556	0	1	0.666667
AD	0.166667	0.166667	0.166667	0	0.0555556	0.0555556	0	0.0555556	0	1	0.666667
AD	0.166667	0.166667	0.166667	0	0.0555556	0.0555556	0	0.0555556	0	1	0.666667
AD	0.166667	0.166667	0.166667	0	0.0555556	0.0555556	0	0.0555556	0	1	0.666667
AD	0.166667	0.166667	0	0	0.0555556	0.0555556	0	0.0555556	0	1	0.5
AD	0.166667	0.166667	0.166667	0	0.0555556	0.0555556	0	0.0555556	0	1	0.666667
AD	0.166667	0.166667	0.166667	0	0.0555556	0.0555556	0	0.0555556	0.0555556	1	0.722222
AD	0.166667	0.166667	0.166667	0	0.0555556	0.0555556	0	0.0555556	0	1	0.666667
AD	0.166667	0.166667	0.166667	0	0.0555556	0.0555556	0	0.0555556	0.0555556	1	0.722222
AD	0.166667	0.166667	0	0	0.0555556	0.0555556	0	0.0555556	0	1	0.5
AD	0.166667	0.166667	0.166667	0	0.0555556	0.0555556	0	0.0555556	0	1	0.666667
AD	0.166667	0.166667	0	0	0.0555556	0.0555556	0	0.0555556	0	1	0.5
AD	0.166667	0.166667	0.166667	0	0.0555556	0.0555556	0	0.0555556	0	1	0.666667
AD	0.166667	0	0.166667	0	0.0555556	0.0555556	0	0.0555556	0	1	0.5
AD	0	0.166667	0.166667	0	0.0555556	0.0555556	0	0.0555556	0	1	0.5
AD	0.166667	0.166667	0.166667	0	0.0555556	0.0555556	0	0.0555556	0	1	0.666667
AD	0.166667	0.166667	0.166667	0	0.0555556	0.0555556	0	0.0555556	0	1	0.666667
AD	0.166667	0.166667	0.166667	0	0.0555556	0.0555556	0	0.0555556	0	1	0.666667
AD	0.166667	0.166667	0.166667	0	0.0555556	0.0555556	0	0.0555556	0	1	0.666667
AD	0.166667	0.166667	0.166667	0	0.0555556	0.0555556	0	0.0555556	0	1	0.666667
AD	0.166667	0.166667	0.166667	0	0.0555556	0.0555556	0	0.0555556	0	1	0.666667
AD	0.166667	0.166667	0.166667	0	0.0555556	0.0555556	0	0.0555556	0	1	0.666667
AD	0.166667	0.166667	0.166667	0	0.0555556	0.0555556	0	0.0555556	0	1	0.666667
AD	0.166667	0	0.166667	0	0.0555556	0	0	0.0555556	0	1	0.444444
AD	0.166667	0.166667	0.166667	0	0.0555556	0.0555556	0	0.0555556	0	1	0.666667
AD	0.166667	0	0	0	0.0555556	0	0	0.0555556	0	0	0.277778
AD	0.166667	0	0	0	0.0555556	0	0	0.0555556	0	0	0.277778
AD	0.166667	0.166667	0	0	0.0555556	0.0555556	0	0.0555556	0	1	0.5
AD	0.166667	0.166667	0	0	0.0555556	0.0555556	0	0.0555556	0	1	0.5
AD	0.166667	0.166667	0.166667	0	0.0555556	0.0555556	0	0.0555556	0	1	0.666667
AD	0.166667	0.166667	0.166667	0	0.0555556	0.0555556	0	0.0555556	0	1	0.666667
AD	0.166667	0.166667	0	0	0.0555556	0.0555556	0	0.0555556	0.0555556	1	0.555556
AD	0.166667	0.166667	0.166667	0	0.0555556	0.0555556	0	0.0555556	0.0555556	1	0.722222
AD	0.166667	0.166667	0.166667	0	0.0555556	0.0555556	0	0.0555556	0	1	0.666667
AD	0.166667	0.166667	0.166667	0	0.0555556	0.0555556	0	0.0555556	0	1	0.666667
AD	0.166667	0.166667	0	0	0.0555556	0.0555556	0	0.0555556	0	1	0.5
AD	0	0	0.166667	0	0.0555556	0.0555556	0	0.0555556	0	1	0.333333
AD	0.166667	0.166667	0	0	0.0555556	0.0555556	0	0.0555556	0	1	0.5
AD	0.166667	0.166667	0.166667	0	0.0555556	0.0555556	0	0.0555556	0	1	0.666667
AD	0.166667	0.166667	0.166667	0	0.0555556	0	0	0.0555556	0	1	0.611111
AD	0.166667	0	0.166667	0	0.0555556	0.0555556	0	0.0555556	0	1	0.5
AD	0.166667	0.166667	0.166667	0	0.0555556	0.0555556	0	0.0555556	0	1	0.666667
AD	0.166667	0.166667	0	0	0.0555556	0.0555556	0	0.0555556	0	1	0.5
AD	0.166667	0.166667	0	0	0.0555556	0.0555556	0	0.0555556	0	1	0.5
AD	0.166667	0	0	0	0.0555556	0.0555556	0	0.0555556	0	1	0.333333
AD	0.166667	0	0.166667	0	0.0555556	0.0555556	0	0.0555556	0	1	0.5
AD	0.166667	0	0.166667	0	0.0555556	0.0555556	0	0.0555556	0	1	0.5
AD	0.166667	0	0	0	0.0555556	0.0555556	0	0.0555556	0	1	0.333333
AD	0.166667	0	0.166667	0	0.0555556	0.0555556	0	0.0555556	0	1	0.5
AD	0.166667	0.166667	0.166667	0	0.0555556	0.0555556	0	0.0555556	0	1	0.666667
AD	0.166667	0.166667	0	0	0.0555556	0.0555556	0	0.0555556	0	1	0.5
AD	0.166667	0.166667	0.166667	0	0.0555556	0.0555556	0	0.0555556	0.0555556	1	0.722222
AD	0.166667	0.166667	0.166667	0	0.0555556	0.0555556	0	0.0555556	0	1	0.666667
AD	0.166667	0.166667	0	0	0.0555556	0.0555556	0	0.0555556	0	1	0.5
AD	0.166667	0.166667	0.166667	0	0.0555556	0.0555556	0	0.0555556	0	1	0.666667
AD	0.166667	0.166667	0.166667	0	0.0555556	0.0555556	0	0.0555556	0	1	0.666667
AD	0.166667	0.166667	0.166667	0	0.0555556	0.0555556	0	0.0555556	0	1	0.666667
AD	0.166667	0	0.166667	0	0.0555556	0.0555556	0	0.0555556	0	1	0.5
AD	0.166667	0	0.166667	0	0.0555556	0.0555556	0	0	0	1	0.444444
AD	0.166667	0.166667	0.166667	0	0.0555556	0.0555556	0	0.0555556	0	1	0.666667
AD	0.166667	0.166667	0	0	0.0555556	0.0555556	0	0.0555556	0	1	0.5
AD	0.166667	0.166667	0	0	0.0555556	0.0555556	0	0.0555556	0	1	0.5
AD	0.166667	0.166667	0.166667	0	0.0555556	0.0555556	0	0.0555556	0	1	0.666667
AD	0.166667	0.166667	0.166667	0	0.0555556	0.0555556	0	0.0555556	0	1	0.666667
AD	0.166667	0.166667	0.166667	0	0.0555556	0.0555556	0	0.0555556	0	1	0.666667
AD	0.166667	0.166667	0.166667	0	0.0555556	0.0555556	0	0.0555556	0	1	0.666667
AD	0.166667	0.166667	0.166667	0	0.0555556	0.0555556	0	0.0555556	0	1	0.666667
AD	0.166667	0.166667	0.166667	0	0.0555556	0.0555556	0	0.0555556	0	1	0.666667
AD	0.166667	0.166667	0.166667	0	0.0555556	0.0555556	0	0.0555556	0	1	0.666667
AD	0.166667	0.166667	0	0	0.0555556	0.0555556	0	0.0555556	0	1	0.5
AD	0.166667	0.166667	0.166667	0	0.0555556	0.0555556	0	0.0555556	0	1	0.666667
AD	0.166667	0	0	0	0.0555556	0.0555556	0	0.0555556	0	1	0.333333
AD	0.166667	0.166667	0.166667	0	0.0555556	0.0555556	0	0.0555556	0	1	0.666667
AD	0.166667	0.166667	0.166667	0	0.0555556	0.0555556	0	0.0555556	0	1	0.666667
AD	0.166667	0.166667	0	0	0.0555556	0.0555556	0	0.0555556	0	1	0.5
AD	0.166667	0.166667	0.166667	0	0.0555556	0.0555556	0	0.0555556	0	1	0.666667
AD	0.166667	0	0	0	0.0555556	0.0555556	0	0.0555556	0	1	0.333333
AD	0.166667	0	0	0	0.0555556	0.0555556	0	0.0555556	0	1	0.333333
AD	0.166667	0.166667	0.166667	0	0.0555556	0.0555556	0	0.0555556	0	1	0.666667
AD	0.166667	0	0	0	0.0555556	0.0555556	0	0.0555556	0	1	0.333333
AD	0.166667	0.166667	0.166667	0	0.0555556	0.0555556	0	0.0555556	0	1	0.666667
AD	0.166667	0.166667	0.166667	0	0.0555556	0.0555556	0	0.0555556	0	1	0.666667
AD	0.166667	0.166667	0.166667	0	0.0555556	0.0555556	0	0.0555556	0	1	0.666667
AD	0.166667	0.166667	0.166667	0	0.0555556	0	0	0.0555556	0	1	0.611111
AD	0	0.166667	0	0	0.0555556	0.0555556	0	0.0555556	0	1	0.333333
AD	0.166667	0.166667	0.166667	0	0.0555556	0	0	0.0555556	0	1	0.611111
AD	0.166667	0.166667	0.166667	0	0.0555556	0	0	0.0555556	0	1	0.611111
AD	0.166667	0.166667	0	0	0.0555556	0	0	0.0555556	0	1	0.444444
AD	0.166667	0.166667	0.166667	0	0.0555556	0	0	0.0555556	0	1	0.611111
AD	0.166667	0.166667	0	0	0.0555556	0.0555556	0	0.0555556	0	1	0.5
AD	0.166667	0.166667	0	0	0.0555556	0.0555556	0	0.0555556	0	1	0.5
AD	0.166667	0.166667	0.166667	0	0.0555556	0.0555556	0	0.0555556	0	1	0.666667
AD	0.166667	0.166667	0.166667	0	0.0555556	0.0555556	0	0.0555556	0	1	0.666667
AD	0.166667	0.166667	0.166667	0	0.0555556	0.0555556	0	0.0555556	0	1	0.666667
AD	0.166667	0	0.166667	0	0.0555556	0.0555556	0	0.0555556	0	1	0.5
AD	0.166667	0.166667	0.166667	0	0.0555556	0.0555556	0	0.0555556	0	1	0.666667
AD	0.166667	0.166667	0.166667	0	0.0555556	0.0555556	0	0.0555556	0	1	0.666667
AD	0	0.166667	0	0	0.0555556	0.0555556	0	0.0555556	0	1	0.333333
AD	0.166667	0.166667	0.166667	0	0.0555556	0.0555556	0	0.0555556	0	1	0.666667
AD	0.166667	0.166667	0.166667	0	0.0555556	0.0555556	0	0.0555556	0	1	0.666667
AD	0.166667	0.166667	0.166667	0	0.0555556	0.0555556	0	0.0555556	0	1	0.666667
AD	0.166667	0.166667	0.166667	0	0.0555556	0.0555556	0	0.0555556	0	1	0.666667
AD	0.166667	0.166667	0	0	0.0555556	0.0555556	0	0.0555556	0	1	0.5
AD	0.166667	0.166667	0.166667	0	0.0555556	0.0555556	0	0.0555556	0.0555556	1	0.722222
AD	0.166667	0.166667	0.166667	0	0.0555556	0	0	0.0555556	0	1	0.611111
AD	0.166667	0.166667	0.166667	0	0.0555556	0	0	0.0555556	0	1	0.611111
AD	0.166667	0.166667	0.166667	0	0.0555556	0.0555556	0	0.0555556	0	1	0.666667
AD	0.166667	0.166667	0.166667	0	0.0555556	0	0	0.0555556	0.0555556	1	0.666667
AD	0.166667	0.166667	0	0	0.0555556	0	0	0.0555556	0	1	0.444444
AD	0.166667	0.166667	0.166667	0	0.0555556	0	0	0.0555556	0	1	0.611111
AD	0.166667	0	0.166667	0	0.0555556	0.0555556	0	0.0555556	0	1	0.5
AD	0.166667	0.166667	0	0	0.0555556	0	0	0.0555556	0	1	0.444444
AD	0.166667	0	0	0	0.0555556	0.0555556	0	0.0555556	0	1	0.333333
AD	0.166667	0.166667	0	0	0.0555556	0	0	0.0555556	0	1	0.444444
AD	0.166667	0.166667	0.166667	0	0.0555556	0.0555556	0	0.0555556	0	1	0.666667
AD	0.166667	0.166667	0	0	0.0555556	0.0555556	0	0.0555556	0	1	0.5
AD	0.166667	0.166667	0	0	0.0555556	0.0555556	0	0.0555556	0	1	0.5
AD	0	0.166667	0	0	0.0555556	0.0555556	0	0.0555556	0	1	0.333333
AD	0.166667	0.166667	0	0	0.0555556	0.0555556	0	0.0555556	0	1	0.5
AD	0.166667	0.166667	0.166667	0	0.0555556	0.0555556	0	0.0555556	0	1	0.666667
AD	0.166667	0.166667	0.166667	0	0.0555556	0.0555556	0	0.0555556	0	1	0.666667
AD	0.166667	0.166667	0.166667	0	0.0555556	0.0555556	0	0.0555556	0	1	0.666667
AD	0.166667	0.166667	0.166667	0	0.0555556	0.0555556	0	0.0555556	0.0555556	1	0.722222
AD	0	0.166667	0	0	0.0555556	0.0555556	0	0.0555556	0.0555556	1	0.388889
AD	0.166667	0	0.166667	0	0.0555556	0.0555556	0	0.0555556	0	1	0.5
AD	0.166667	0	0.166667	0	0.0555556	0.0555556	0	0.0555556	0	1	0.5
AD	0	0.166667	0	0	0.0555556	0.0555556	0	0	0	0	0.277778
AD	0.166667	0.166667	0	0	0.0555556	0.0555556	0	0	0	1	0.444444
AD	0.166667	0.166667	0	0	0.0555556	0.0555556	0	0	0	1	0.444444
AD	0.166667	0.166667	0	0	0.0555556	0.0555556	0	0.0555556	0	1	0.5
AD	0.166667	0.166667	0.166667	0	0.0555556	0.0555556	0	0.0555556	0	1	0.666667
AD	0.166667	0.166667	0.166667	0	0.0555556	0.0555556	0	0.0555556	0	1	0.666667
AD	0.166667	0.166667	0.166667	0	0.0555556	0.0555556	0	0.0555556	0	1	0.666667
AD	0.166667	0.166667	0.166667	0	0.0555556	0.0555556	0	0.0555556	0	1	0.666667
AD	0.166667	0.166667	0.166667	0	0.0555556	0.0555556	0	0.0555556	0.0555556	1	0.722222
AD	0.166667	0.166667	0.166667	0	0.0555556	0.0555556	0	0.0555556	0	1	0.666667
AD	0.166667	0.166667	0.166667	0	0.0555556	0.0555556	0	0.0555556	0	1	0.666667
AD	0.166667	0.166667	0.166667	0	0.0555556	0.0555556	0	0.0555556	0	1	0.666667
AD	0.166667	0.166667	0.166667	0	0.0555556	0.0555556	0	0.0555556	0	1	0.666667
AD	0.166667	0.166667	0.166667	0.0555556	0.0555556	0.0555556	0	0.0555556	0	1	0.722222
AD	0.166667	0	0.166667	0.0555556	0.0555556	0.0555556	0	0.0555556	0.0555556	1	0.611111
AD	0.166667	0.166667	0.166667	0.0555556	0.0555556	0.0555556	0	0.0555556	0	1	0.722222
AD	0.166667	0.166667	0.166667	0.0555556	0.0555556	0.0555556	0	0.0555556	0	1	0.722222
AD	0.166667	0.166667	0.166667	0.0555556	0.0555556	0.0555556	0	0.0555556	0	1	0.722222
AD	0.166667	0.166667	0.166667	0.0555556	0.0555556	0.0555556	0	0.0555556	0	1	0.722222
AD	0.166667	0.166667	0.166667	0.0555556	0.0555556	0.0555556	0	0.0555556	0	1	0.722222
AD	0.166667	0.166667	0	0.0555556	0.0555556	0.0555556	0	0	0	1	0.5
AD	0.166667	0.166667	0.166667	0.0555556	0.0555556	0.0555556	0	0.0555556	0	1	0.722222
AD	0.166667	0.166667	0.166667	0.0555556	0.0555556	0.0555556	0	0.0555556	0	1	0.722222
AD	0.166667	0.166667	0.166667	0.0555556	0.0555556	0.0555556	0	0.0555556	0	1	0.722222
AD	0.166667	0.166667	0.166667	0.0555556	0.0555556	0.0555556	0	0.0555556	0	1	0.722222
AD	0.166667	0.166667	0.166667	0.0555556	0.0555556	0.0555556	0	0.0555556	0.0555556	1	0.777778
AD	0.166667	0.166667	0.166667	0.0555556	0.0555556	0.0555556	0	0.0555556	0	1	0.722222
AD	0.166667	0.166667	0	0.0555556	0.0555556	0.0555556	0	0.0555556	0.0555556	1	0.611111
AD	0.166667	0.166667	0.166667	0.0555556	0.0555556	0.0555556	0	0.0555556	0	1	0.722222
AD	0.166667	0.166667	0	0.0555556	0.0555556	0.0555556	0	0.0555556	0	1	0.555556
AD	0.166667	0.166667	0.166667	0.0555556	0.0555556	0.0555556	0	0.0555556	0	1	0.722222
AD	0.166667	0.166667	0	0.0555556	0.0555556	0.0555556	0	0.0555556	0.0555556	1	0.611111
AD	0.166667	0.166667	0	0.0555556	0.0555556	0.0555556	0	0.0555556	0.0555556	1	0.611111
AD	0.166667	0	0.166667	0	0.0555556	0.0555556	0	0	0	1	0.444444
AD	0.166667	0	0.166667	0	0.0555556	0.0555556	0	0	0	1	0.444444
AD	0	0.166667	0.166667	0	0.0555556	0.0555556	0	0.0555556	0	1	0.5
AD	0.166667	0.166667	0.166667	0	0.0555556	0.0555556	0	0.0555556	0	1	0.666667
AD	0.166667	0	0.166667	0	0.0555556	0.0555556	0	0.0555556	0	1	0.5
AD	0.166667	0.166667	0.166667	0	0.0555556	0.0555556	0	0.0555556	0	1	0.666667
AD	0.166667	0.166667	0.166667	0	0.0555556	0.0555556	0	0.0555556	0	1	0.666667
AD	0.166667	0.166667	0	0	0.0555556	0.0555556	0	0.0555556	0	1	0.5
AD	0.166667	0.166667	0.166667	0	0.0555556	0.0555556	0	0.0555556	0	1	0.666667
AD	0.166667	0.166667	0	0	0.0555556	0.0555556	0	0.0555556	0	1	0.5
AD	0.166667	0.166667	0.166667	0	0.0555556	0.0555556	0	0.0555556	0	1	0.666667
AD	0	0.166667	0	0	0.0555556	0.0555556	0	0	0	0	0.277778
AD	0.166667	0	0.166667	0.0555556	0.0555556	0.0555556	0	0.0555556	0	1	0.555556
AD	0.166667	0.166667	0.166667	0.0555556	0.0555556	0.0555556	0	0.0555556	0	1	0.722222
AD	0.166667	0.166667	0.166667	0	0.0555556	0.0555556	0	0	0	1	0.611111
AD	0.166667	0.166667	0.166667	0	0.0555556	0.0555556	0	0	0	1	0.611111
AD	0.166667	0.166667	0	0.0555556	0.0555556	0.0555556	0	0.0555556	0	1	0.555556
AD	0.166667	0.166667	0	0.0555556	0.0555556	0.0555556	0	0.0555556	0	1	0.555556
AD	0	0.166667	0	0.0555556	0.0555556	0.0555556	0	0.0555556	0	1	0.388889
AD	0.166667	0	0.166667	0.0555556	0.0555556	0.0555556	0	0.0555556	0	1	0.555556
AD	0.166667	0.166667	0.166667	0.0555556	0.0555556	0.0555556	0	0.0555556	0	1	0.722222
AD	0.166667	0.166667	0.166667	0.0555556	0.0555556	0.0555556	0	0.0555556	0.0555556	1	0.777778
AD	0	0.166667	0.166667	0.0555556	0.0555556	0.0555556	0	0.0555556	0	1	0.555556
AD	0.166667	0.166667	0.166667	0.0555556	0.0555556	0.0555556	0	0.0555556	0	1	0.722222
AD	0.166667	0.166667	0	0	0.0555556	0.0555556	0	0.0555556	0	1	0.5
AD	0.166667	0.166667	0.166667	0	0.0555556	0.0555556	0	0.0555556	0	1	0.666667
AD	0	0	0.166667	0	0.0555556	0.0555556	0	0.0555556	0	1	0.333333
AD	0.166667	0.166667	0.166667	0	0.0555556	0.0555556	0	0.0555556	0	1	0.666667
AD	0.166667	0.166667	0.166667	0	0.0555556	0.0555556	0	0.0555556	0	1	0.666667
AD	0.166667	0.166667	0	0	0.0555556	0.0555556	0	0.0555556	0	1	0.5
AD	0.166667	0.166667	0	0	0.0555556	0.0555556	0	0.0555556	0	1	0.5
AD	0.166667	0.166667	0.166667	0	0.0555556	0.0555556	0	0.0555556	0	1	0.666667
AD	0.166667	0.166667	0.166667	0	0.0555556	0.0555556	0	0.0555556	0	1	0.666667
AD	0.166667	0	0.166667	0	0.0555556	0.0555556	0	0	0	1	0.444444
AD	0.166667	0.166667	0.166667	0	0.0555556	0.0555556	0	0.0555556	0	1	0.666667
AD	0.166667	0.166667	0	0	0.0555556	0.0555556	0	0.0555556	0	1	0.5
AD	0.166667	0.166667	0.166667	0	0.0555556	0.0555556	0	0.0555556	0	1	0.666667
AD	0.166667	0.166667	0	0	0.0555556	0.0555556	0	0.0555556	0	1	0.5
AD	0.166667	0.166667	0.166667	0	0.0555556	0	0	0.0555556	0	1	0.611111
AD	0.166667	0.166667	0	0	0.0555556	0	0	0.0555556	0	1	0.444444
AD	0	0.166667	0	0.0555556	0.0555556	0	0	0.0555556	0	1	0.333333
AD	0.166667	0.166667	0.166667	0.0555556	0.0555556	0	0	0.0555556	0	1	0.666667
AD	0.166667	0.166667	0.166667	0.0555556	0.0555556	0	0	0.0555556	0	1	0.666667
AD	0	0.166667	0.166667	0.0555556	0.0555556	0	0	0.0555556	0	1	0.5
AD	0	0.166667	0	0.0555556	0.0555556	0	0	0.0555556	0	1	0.333333
AD	0	0.166667	0.166667	0.0555556	0.0555556	0	0	0.0555556	0	1	0.5
AD	0.166667	0.166667	0.166667	0.0555556	0.0555556	0	0	0.0555556	0	1	0.666667
AD	0.166667	0.166667	0.166667	0.0555556	0.0555556	0	0	0.0555556	0	1	0.666667
AD	0.166667	0.166667	0.166667	0.0555556	0.0555556	0.0555556	0	0.0555556	0	1	0.722222
AD	0.166667	0.166667	0.166667	0.0555556	0.0555556	0	0	0.0555556	0	1	0.666667
AD	0.166667	0.166667	0.166667	0	0.0555556	0	0	0.0555556	0.0555556	1	0.666667
AD	0	0.166667	0	0.0555556	0.0555556	0	0	0.0555556	0	1	0.333333
AD	0.166667	0.166667	0.166667	0.0555556	0.0555556	0	0	0.0555556	0	1	0.666667
AD	0.166667	0.166667	0.166667	0.0555556	0.0555556	0	0	0.0555556	0	1	0.666667
AD	0	0.166667	0	0.0555556	0.0555556	0	0	0.0555556	0	1	0.333333
AD	0.166667	0.166667	0.166667	0.0555556	0.0555556	0	0	0.0555556	0.0555556	1	0.722222
AD	0	0.166667	0.166667	0.0555556	0.0555556	0	0	0.0555556	0	1	0.5
AD	0.166667	0.166667	0.166667	0.0555556	0.0555556	0	0	0.0555556	0.0555556	1	0.722222
AD	0.166667	0.166667	0	0	0.0555556	0.0555556	0	0	0	1	0.444444
AD	0.166667	0.166667	0	0.0555556	0.0555556	0.0555556	0	0.0555556	0	1	0.555556
AD	0.166667	0.166667	0	0	0.0555556	0.0555556	0	0	0	1	0.444444
AD	0.166667	0.166667	0	0.0555556	0.0555556	0.0555556	0	0	0	1	0.5
AD	0.166667	0.166667	0	0	0.0555556	0.0555556	0	0	0	1	0.444444
AD	0.166667	0.166667	0	0.0555556	0.0555556	0.0555556	0	0.0555556	0.0555556	1	0.611111
AD	0.166667	0	0.166667	0.0555556	0.0555556	0.0555556	0	0.0555556	0	1	0.555556
AD	0.166667	0	0.166667	0.0555556	0.0555556	0.0555556	0	0	0	1	0.5
AD	0.166667	0	0.166667	0.0555556	0.0555556	0.0555556	0	0	0	1	0.5
AD	0	0	0	0.0555556	0.0555556	0.0555556	0	0	0	0	0.166667
AD	0.166667	0.166667	0.166667	0	0.0555556	0.0555556	0	0	0	1	0.611111
AD	0	0.166667	0	0	0.0555556	0.0555556	0	0	0	0	0.277778
AD	0	0	0	0.0555556	0.0555556	0.0555556	0	0.0555556	0.0555556	0	0.277778
AD	0	0.166667	0	0	0.0555556	0.0555556	0	0	0	0	0.277778
AD	0	0.166667	0	0	0.0555556	0.0555556	0	0	0	0	0.277778
AD	0.166667	0.166667	0	0	0.0555556	0.0555556	0	0	0	1	0.444444
AD	0	0.166667	0	0.0555556	0.0555556	0.0555556	0	0.0555556	0	1	0.388889
AD	0	0.166667	0	0.0555556	0.0555556	0.0555556	0	0.0555556	0	1	0.388889
AD	0	0.166667	0	0	0.0555556	0.0555556	0	0	0	0	0.277778
AD	0	0.166667	0.166667	0.0555556	0.0555556	0.0555556	0	0	0	1	0.5
AD	0.166667	0.166667	0.166667	0.0555556	0.0555556	0.0555556	0	0	0	1	0.666667
AD	0.166667	0.166667	0.166667	0.0555556	0.0555556	0.0555556	0	0	0	1	0.666667
AD	0.166667	0.166667	0	0.0555556	0.0555556	0.0555556	0	0	0	1	0.5
AD	0.166667	0.166667	0	0.0555556	0.0555556	0.0555556	0	0.0555556	0.0555556	1	0.611111
AD	0	0.166667	0	0.0555556	0.0555556	0.0555556	0	0.0555556	0.0555556	1	0.444444
AD	0	0.166667	0	0.0555556	0.0555556	0.0555556	0	0.0555556	0.0555556	1	0.444444
AD	0.166667	0	0	0.0555556	0.0555556	0.0555556	0	0	0	1	0.333333
AD	0.166667	0	0	0.0555556	0.0555556	0.0555556	0	0	0	1	0.333333
AD	0	0.166667	0	0.0555556	0.0555556	0.0555556	0	0.0555556	0	1	0.388889
AD	0.166667	0.166667	0.166667	0.0555556	0.0555556	0.0555556	0	0.0555556	0	1	0.722222
AD	0	0.166667	0	0.0555556	0.0555556	0.0555556	0	0.0555556	0	1	0.388889
AD	0	0.166667	0	0.0555556	0.0555556	0.0555556	0	0.0555556	0	1	0.388889
AD	0.166667	0.166667	0	0.0555556	0.0555556	0.0555556	0	0.0555556	0	1	0.555556
AD	0.166667	0.166667	0	0.0555556	0.0555556	0.0555556	0	0.0555556	0	1	0.555556
AD	0.166667	0.166667	0.166667	0	0.0555556	0.0555556	0	0.0555556	0	1	0.666667
AD	0.166667	0.166667	0.166667	0	0.0555556	0.0555556	0	0.0555556	0	1	0.666667
AD	0	0.166667	0	0.0555556	0.0555556	0.0555556	0	0	0	1	0.333333
AD	0.166667	0.166667	0.166667	0.0555556	0.0555556	0.0555556	0	0	0	1	0.666667
AD	0.166667	0.166667	0	0.0555556	0.0555556	0.0555556	0	0	0.0555556	1	0.555556
AD	0.166667	0.166667	0.166667	0	0.0555556	0.0555556	0	0	0	1	0.611111
AD	0	0.166667	0	0	0.0555556	0.0555556	0	0	0	0	0.277778
AD	0	0.166667	0	0.0555556	0.0555556	0.0555556	0	0	0.0555556	1	0.388889
AD	0.166667	0.166667	0	0.0555556	0.0555556	0.0555556	0	0	0.0555556	1	0.555556
AD	0	0.166667	0	0.0555556	0.0555556	0.0555556	0	0	0.0555556	1	0.388889
AD	0.166667	0	0.166667	0.0555556	0.0555556	0.0555556	0	0	0.0555556	1	0.555556
AD	0	0.166667	0	0.0555556	0.0555556	0.0555556	0	0	0	1	0.333333
AD	0.166667	0	0	0.0555556	0.0555556	0.0555556	0	0	0.0555556	1	0.388889
AD	0	0.166667	0	0.0555556	0.0555556	0.0555556	0	0	0	1	0.333333
AD	0.166667	0	0	0.0555556	0.0555556	0.0555556	0	0	0.0555556	1	0.388889
AD	0.166667	0.166667	0	0.0555556	0.0555556	0.0555556	0	0	0.0555556	1	0.555556
AD	0	0.166667	0.166667	0.0555556	0.0555556	0.0555556	0	0	0.0555556	1	0.555556
AD	0.166667	0.166667	0	0.0555556	0.0555556	0.0555556	0	0	0	1	0.5
AD	0.166667	0.166667	0.166667	0.0555556	0.0555556	0.0555556	0	0.0555556	0	1	0.722222
AD	0	0.166667	0.166667	0.0555556	0.0555556	0.0555556	0	0	0.0555556	1	0.555556
AD	0.166667	0.166667	0.166667	0.0555556	0.0555556	0.0555556	0	0.0555556	0.0555556	1	0.777778
AD	0.166667	0.166667	0	0.0555556	0.0555556	0.0555556	0	0.0555556	0	1	0.555556
AD	0.166667	0.166667	0	0.0555556	0.0555556	0.0555556	0	0.0555556	0.0555556	1	0.611111
AD	0.166667	0.166667	0	0.0555556	0.0555556	0.0555556	0	0	0	1	0.5
AD	0	0.166667	0	0.0555556	0.0555556	0.0555556	0	0	0.0555556	1	0.388889
AD	0.166667	0.166667	0.166667	0.0555556	0.0555556	0.0555556	0	0	0	1	0.666667
AD	0.166667	0	0	0	0.0555556	0.0555556	0	0.0555556	0	1	0.333333
AD	0	0.166667	0	0.0555556	0.0555556	0.0555556	0	0.0555556	0	1	0.388889
AD	0.166667	0.166667	0	0.0555556	0.0555556	0.0555556	0	0.0555556	0	1	0.555556
AD	0.166667	0.166667	0.166667	0.0555556	0.0555556	0.0555556	0	0.0555556	0	1	0.722222
AD	0.166667	0.166667	0	0.0555556	0.0555556	0.0555556	0	0	0	1	0.5
AD	0.166667	0.166667	0.166667	0.0555556	0.0555556	0.0555556	0	0.0555556	0	1	0.722222
AD	0.166667	0	0.166667	0	0.0555556	0.0555556	0	0	0	1	0.444444
AD	0.166667	0.166667	0	0.0555556	0.0555556	0.0555556	0	0	0.0555556	1	0.555556
AD	0	0.166667	0	0	0.0555556	0.0555556	0	0	0	0	0.277778
AD	0.166667	0.166667	0	0.0555556	0.0555556	0.0555556	0	0.0555556	0	1	0.555556
AD	0	0.166667	0	0.0555556	0.0555556	0.0555556	0	0	0.0555556	1	0.388889
AD	0.166667	0.166667	0.166667	0.0555556	0.0555556	0.0555556	0	0.0555556	0	1	0.722222
AD	0.166667	0.166667	0.166667	0.0555556	0.0555556	0.0555556	0	0.0555556	0	1	0.722222
AD	0.166667	0.166667	0.166667	0.0555556	0.0555556	0.0555556	0	0.0555556	0.0555556	1	0.777778
AD	0	0.166667	0	0	0.0555556	0.0555556	0	0	0	0	0.277778
AD	0.166667	0.166667	0	0.0555556	0.0555556	0.0555556	0	0.0555556	0	1	0.555556
AD	0.166667	0	0.166667	0.0555556	0.0555556	0.0555556	0	0	0	1	0.5
AD	0.166667	0.166667	0.166667	0	0.0555556	0.0555556	0	0.0555556	0	1	0.666667
AD	0.166667	0	0	0.0555556	0.0555556	0.0555556	0	0.0555556	0.0555556	1	0.444444
AD	0.166667	0.166667	0.166667	0	0.0555556	0.0555556	0	0.0555556	0.0555556	1	0.722222
AD	0.166667	0.166667	0.166667	0	0.0555556	0.0555556	0	0.0555556	0	1	0.666667
AD	0.166667	0	0	0	0.0555556	0.0555556	0	0.0555556	0	1	0.333333
AD	0.166667	0.166667	0.166667	0	0.0555556	0.0555556	0	0.0555556	0	1	0.666667
AD	0.166667	0.166667	0.166667	0	0.0555556	0.0555556	0	0.0555556	0	1	0.666667
AD	0.166667	0.166667	0	0	0.0555556	0.0555556	0	0.0555556	0	1	0.5
AD	0.166667	0	0.166667	0	0.0555556	0.0555556	0	0.0555556	0	1	0.5
AD	0.166667	0.166667	0.166667	0	0.0555556	0.0555556	0	0.0555556	0	1	0.666667
AD	0.166667	0.166667	0	0	0.0555556	0.0555556	0	0.0555556	0	1	0.5
AD	0.166667	0.166667	0.166667	0	0.0555556	0.0555556	0	0.0555556	0	1	0.666667
AD	0.166667	0	0.166667	0	0.0555556	0.0555556	0	0.0555556	0	1	0.5
AD	0.166667	0.166667	0	0	0.0555556	0.0555556	0	0.0555556	0	1	0.5
AD	0.166667	0	0.166667	0	0.0555556	0.0555556	0	0.0555556	0.0555556	1	0.555556
AD	0.166667	0.166667	0	0	0.0555556	0.0555556	0	0.0555556	0	1	0.5
AD	0.166667	0	0.166667	0	0.0555556	0.0555556	0	0.0555556	0	1	0.5
AD	0.166667	0.166667	0	0	0.0555556	0.0555556	0	0.0555556	0	1	0.5
AD	0.166667	0	0.166667	0	0.0555556	0.0555556	0	0.0555556	0	1	0.5
AD	0.166667	0.166667	0.166667	0	0.0555556	0.0555556	0	0	0	1	0.611111
AD	0.166667	0.166667	0	0	0.0555556	0.0555556	0	0.0555556	0	1	0.5
AD	0.166667	0.166667	0	0	0.0555556	0.0555556	0	0.0555556	0	1	0.5
AD	0.166667	0.166667	0.166667	0	0.0555556	0.0555556	0	0.0555556	0	1	0.666667
AD	0.166667	0.166667	0	0	0.0555556	0.0555556	0	0.0555556	0	1	0.5
AD	0.166667	0.166667	0	0	0.0555556	0.0555556	0	0.0555556	0	1	0.5
AD	0.166667	0.166667	0.166667	0	0.0555556	0.0555556	0	0.0555556	0	1	0.666667
AD	0.166667	0.166667	0.166667	0	0.0555556	0.0555556	0	0	0	1	0.611111
AD	0.166667	0.166667	0	0	0.0555556	0.0555556	0	0.0555556	0	1	0.5
AD	0.166667	0.166667	0	0	0.0555556	0.0555556	0	0	0.0555556	1	0.5
AD	0.166667	0.166667	0	0	0.0555556	0.0555556	0	0.0555556	0	1	0.5
AD	0.166667	0.166667	0.166667	0	0.0555556	0.0555556	0	0.0555556	0.0555556	1	0.722222
AD	0.166667	0.166667	0.166667	0	0.0555556	0.0555556	0	0.0555556	0.0555556	1	0.722222
AD	0.166667	0.166667	0.166667	0	0.0555556	0.0555556	0	0.0555556	0.0555556	1	0.722222
AD	0.166667	0.166667	0.166667	0	0.0555556	0.0555556	0	0.0555556	0	1	0.666667
AD	0.166667	0.166667	0.166667	0	0.0555556	0.0555556	0	0.0555556	0.0555556	1	0.722222
AD	0.166667	0.166667	0.166667	0	0.0555556	0.0555556	0	0	0	1	0.611111
AD	0.166667	0.166667	0.166667	0	0.0555556	0.0555556	0	0	0	1	0.611111
AD	0.166667	0	0.166667	0.0555556	0.0555556	0.0555556	0	0.0555556	0	1	0.555556
AD	0.166667	0.166667	0.166667	0.0555556	0.0555556	0.0555556	0	0.0555556	0	1	0.722222
AD	0.166667	0.166667	0.166667	0.0555556	0.0555556	0.0555556	0	0.0555556	0	1	0.722222
AD	0.166667	0.166667	0.166667	0.0555556	0.0555556	0.0555556	0	0.0555556	0	1	0.722222
AD	0.166667	0.166667	0.166667	0.0555556	0.0555556	0.0555556	0	0	0	1	0.666667
AD	0.166667	0.166667	0.166667	0.0555556	0.0555556	0.0555556	0	0.0555556	0	1	0.722222
AD	0.166667	0.166667	0	0.0555556	0.0555556	0.0555556	0	0.0555556	0	1	0.555556
AD	0.166667	0.166667	0.166667	0.0555556	0.0555556	0.0555556	0	0.0555556	0	1	0.722222
AD	0.166667	0.166667	0	0.0555556	0.0555556	0.0555556	0	0.0555556	0	1	0.555556
AD	0.166667	0.166667	0	0.0555556	0.0555556	0.0555556	0	0.0555556	0	1	0.555556
AD	0.166667	0	0.166667	0.0555556	0.0555556	0.0555556	0	0.0555556	0	1	0.555556
AD	0.166667	0.166667	0	0.0555556	0.0555556	0.0555556	0	0.0555556	0	1	0.555556
AD	0.166667	0.166667	0	0.0555556	0.0555556	0.0555556	0	0.0555556	0	1	0.555556
AD	0.166667	0.166667	0	0.0555556	0.0555556	0.0555556	0	0.0555556	0	1	0.555556
AD	0	0.166667	0.166667	0.0555556	0.0555556	0.0555556	0	0.0555556	0.0555556	1	0.611111
AD	0.166667	0.166667	0.166667	0.0555556	0.0555556	0.0555556	0	0.0555556	0	1	0.722222
AD	0.166667	0.166667	0	0.0555556	0.0555556	0.0555556	0	0	0	1	0.5
AD	0.166667	0.166667	0.166667	0.0555556	0.0555556	0.0555556	0	0.0555556	0	1	0.722222
AD	0.166667	0.166667	0.166667	0.0555556	0.0555556	0.0555556	0	0.0555556	0.0555556	1	0.777778
AD	0	0.166667	0	0	0.0555556	0	0	0	0	0	0.222222
AD	0.166667	0	0.166667	0	0.0555556	0	0	0	0	1	0.388889
AD	0.166667	0	0.166667	0	0.0555556	0	0	0	0	1	0.388889
AD	0.166667	0	0.166667	0	0.0555556	0	0	0	0	1	0.388889
AD	0.166667	0	0.166667	0	0.0555556	0.0555556	0	0	0	1	0.444444
AD	0.166667	0.166667	0.166667	0.0555556	0.0555556	0.0555556	0	0.0555556	0	1	0.722222
AD	0.166667	0	0	0	0.0555556	0	0	0	0	0	0.222222
AD	0.166667	0	0	0	0.0555556	0	0	0	0	0	0.222222
AD	0	0	0	0	0.0555556	0	0	0	0	0	0.0555556
AD	0.166667	0	0.166667	0.0555556	0.0555556	0	0	0.0555556	0	1	0.5
AD	0.166667	0.166667	0.166667	0.0555556	0.0555556	0	0	0.0555556	0	1	0.666667
AD	0.166667	0.166667	0.166667	0.0555556	0.0555556	0	0	0.0555556	0	1	0.666667
AD	0.166667	0	0	0	0.0555556	0	0	0	0	0	0.222222
AD	0	0	0.166667	0	0.0555556	0	0	0	0	0	0.222222
AD	0.166667	0	0.166667	0	0.0555556	0	0	0	0	1	0.388889
AD	0.166667	0.166667	0.166667	0.0555556	0.0555556	0	0	0.0555556	0	1	0.666667
AD	0.166667	0.166667	0.166667	0.0555556	0.0555556	0	0	0.0555556	0	1	0.666667
AD	0.166667	0.166667	0.166667	0.0555556	0.0555556	0	0	0.0555556	0	1	0.666667
AD	0.166667	0	0.166667	0.0555556	0.0555556	0.0555556	0	0.0555556	0	1	0.555556
AD	0.166667	0.166667	0.166667	0.0555556	0.0555556	0.0555556	0	0.0555556	0	1	0.722222
AD	0.166667	0	0.166667	0.0555556	0.0555556	0.0555556	0	0.0555556	0	1	0.555556
AD	0.166667	0.166667	0.166667	0.0555556	0.0555556	0.0555556	0	0.0555556	0	1	0.722222
AD	0.166667	0.166667	0	0.0555556	0.0555556	0.0555556	0	0.0555556	0	1	0.555556
AD	0.166667	0	0.166667	0.0555556	0.0555556	0.0555556	0	0.0555556	0.0555556	1	0.611111
AD	0.166667	0.166667	0	0.0555556	0.0555556	0.0555556	0	0.0555556	0	1	0.555556
AD	0.166667	0.166667	0.166667	0.0555556	0.0555556	0.0555556	0	0.0555556	0.0555556	1	0.777778
AD	0.166667	0.166667	0.166667	0.0555556	0.0555556	0.0555556	0	0.0555556	0.0555556	1	0.777778
AD	0.166667	0	0	0.0555556	0.0555556	0.0555556	0	0.0555556	0	1	0.388889
AD	0.166667	0.166667	0	0.0555556	0.0555556	0.0555556	0	0.0555556	0	1	0.555556
AD	0.166667	0.166667	0.166667	0.0555556	0.0555556	0.0555556	0	0.0555556	0	1	0.722222
AD	0.166667	0.166667	0.166667	0.0555556	0.0555556	0.0555556	0	0.0555556	0	1	0.722222
AD	0.166667	0.166667	0.166667	0.0555556	0.0555556	0.0555556	0	0.0555556	0	1	0.722222
AD	0.166667	0.166667	0.166667	0.0555556	0.0555556	0.0555556	0	0.0555556	0	1	0.722222
AD	0.166667	0	0.166667	0.0555556	0.0555556	0.0555556	0	0.0555556	0.0555556	1	0.611111
AD	0.166667	0	0	0.0555556	0.0555556	0.0555556	0	0.0555556	0	1	0.388889
AD	0.166667	0.166667	0.166667	0.0555556	0.0555556	0.0555556	0	0.0555556	0	1	0.722222
AD	0.166667	0.166667	0	0.0555556	0.0555556	0.0555556	0	0.0555556	0.0555556	1	0.611111
AD	0.166667	0	0.166667	0.0555556	0.0555556	0.0555556	0	0.0555556	0	1	0.555556
AD	0.166667	0	0.166667	0.0555556	0.0555556	0.0555556	0	0	0.0555556	1	0.555556
AD	0	0.166667	0	0	0.0555556	0.0555556	0	0.0555556	0.0555556	1	0.388889
AD	0	0.166667	0.166667	0	0.0555556	0.0555556	0	0.0555556	0.0555556	1	0.555556
AD	0.166667	0	0.166667	0	0.0555556	0.0555556	0	0.0555556	0.0555556	1	0.555556
AD	0.166667	0.166667	0.166667	0	0.0555556	0.0555556	0	0.0555556	0.0555556	1	0.722222
AD	0	0.166667	0	0	0.0555556	0.0555556	0	0.0555556	0.0555556	1	0.388889
AD	0.166667	0.166667	0	0	0.0555556	0.0555556	0	0.0555556	0.0555556	1	0.555556
AD	0.166667	0.166667	0.166667	0	0.0555556	0.0555556	0	0.0555556	0.0555556	1	0.722222
AD	0.166667	0.166667	0	0	0.0555556	0.0555556	0	0.0555556	0	1	0.5
AD	0	0	0	0.0555556	0.0555556	0.0555556	0	0	0	0	0.166667
AD	0.166667	0.166667	0	0.0555556	0.0555556	0.0555556	0	0.0555556	0	1	0.555556
AD	0.166667	0.166667	0.166667	0.0555556	0.0555556	0.0555556	0	0.0555556	0	1	0.722222
AD	0.166667	0.166667	0	0	0.0555556	0.0555556	0	0.0555556	0	1	0.5
AD	0.166667	0.166667	0.166667	0	0.0555556	0.0555556	0	0.0555556	0	1	0.666667
AD	0.166667	0.166667	0.166667	0	0.0555556	0.0555556	0	0.0555556	0	1	0.666667
AD	0.166667	0.166667	0.166667	0	0.0555556	0.0555556	0	0.0555556	0	1	0.666667
AD	0.166667	0.166667	0.166667	0	0.0555556	0.0555556	0	0.0555556	0.0555556	1	0.722222
AD	0.166667	0	0.166667	0.0555556	0.0555556	0.0555556	0	0	0	1	0.5
AD	0.166667	0	0.166667	0.0555556	0.0555556	0.0555556	0	0.0555556	0	1	0.555556
AD	0.166667	0.166667	0	0	0.0555556	0.0555556	0	0.0555556	0	1	0.5
AD	0.166667	0.166667	0.166667	0.0555556	0.0555556	0.0555556	0	0.0555556	0	1	0.722222
AD	0.166667	0.166667	0.166667	0.0555556	0.0555556	0.0555556	0	0.0555556	0	1	0.722222
AD	0.166667	0.166667	0	0.0555556	0.0555556	0.0555556	0	0.0555556	0	1	0.555556
AD	0.166667	0.166667	0.166667	0.0555556	0.0555556	0.0555556	0	0.0555556	0	1	0.722222
AD	0.166667	0	0.166667	0	0.0555556	0	0	0.0555556	0	1	0.444444
AD	0.166667	0	0.166667	0	0.0555556	0	0	0.0555556	0	1	0.444444
AD	0.166667	0.166667	0	0.0555556	0.0555556	0	0	0.0555556	0	1	0.5
AD	0.166667	0.166667	0.166667	0.0555556	0.0555556	0	0	0	0	1	0.611111
AD	0.166667	0	0.166667	0.0555556	0.0555556	0	0	0.0555556	0	1	0.5
AD	0.166667	0.166667	0.166667	0.0555556	0.0555556	0	0	0.0555556	0	1	0.666667
AD	0.166667	0.166667	0.166667	0.0555556	0.0555556	0.0555556	0	0.0555556	0	1	0.722222
AD	0.166667	0.166667	0	0.0555556	0.0555556	0.0555556	0	0.0555556	0	1	0.555556
AD	0.166667	0.166667	0	0.0555556	0.0555556	0.0555556	0	0.0555556	0	1	0.555556
AD	0.166667	0	0.166667	0.0555556	0.0555556	0.0555556	0	0.0555556	0	1	0.555556
AD	0.166667	0	0.166667	0	0.0555556	0.0555556	0	0.0555556	0	1	0.5
AD	0.166667	0.166667	0.166667	0	0.0555556	0.0555556	0	0.0555556	0	1	0.666667
AD	0.166667	0.166667	0	0.0555556	0.0555556	0.0555556	0	0.0555556	0	1	0.555556
AD	0.166667	0.166667	0.166667	0.0555556	0.0555556	0.0555556	0	0.0555556	0	1	0.722222
AD	0.166667	0.166667	0.166667	0.0555556	0.0555556	0.0555556	0	0.0555556	0	1	0.722222
AD	0.166667	0.166667	0	0.0555556	0.0555556	0.0555556	0	0.0555556	0	1	0.555556
AD	0.166667	0	0.166667	0.0555556	0.0555556	0.0555556	0	0.0555556	0	1	0.555556
AD	0.166667	0	0.166667	0.0555556	0.0555556	0.0555556	0	0.0555556	0	1	0.555556
AD	0	0	0.166667	0	0.0555556	0.0555556	0	0	0	0	0.277778
AD	0.166667	0	0.166667	0	0.0555556	0.0555556	0	0	0	1	0.444444
AD	0	0	0	0	0.0555556	0.0555556	0	0	0	0	0.111111
AD	0.166667	0.166667	0.166667	0.0555556	0.0555556	0.0555556	0	0.0555556	0	1	0.722222
AD	0.166667	0.166667	0.166667	0.0555556	0.0555556	0.0555556	0	0.0555556	0	1	0.722222
AD	0	0	0	0	0.0555556	0.0555556	0	0.0555556	0	0	0.166667
AD	0	0	0	0	0.0555556	0.0555556	0	0.0555556	0	0	0.166667
AD	0	0	0.166667	0.0555556	0.0555556	0.0555556	0	0	0	1	0.333333
AD	0.166667	0.166667	0.166667	0.0555556	0.0555556	0.0555556	0	0.0555556	0	1	0.722222
AD	0	0	0	0	0.0555556	0.0555556	0	0.0555556	0	0	0.166667
AD	0	0	0	0.0555556	0.0555556	0.0555556	0	0	0	0	0.166667
AD	0.166667	0	0.166667	0	0.0555556	0.0555556	0	0	0	1	0.444444
AD	0	0.166667	0.166667	0.0555556	0.0555556	0.0555556	0	0.0555556	0	1	0.555556
AD	0	0	0	0.0555556	0.0555556	0.0555556	0	0	0	0	0.166667
AD	0	0	0.166667	0.0555556	0.0555556	0	0	0.0555556	0	1	0.333333
AD	0	0.166667	0	0.0555556	0.0555556	0.0555556	0	0	0	1	0.333333
AD	0.166667	0.166667	0.166667	0.0555556	0.0555556	0.0555556	0	0	0	1	0.666667
AD	0	0.166667	0	0	0.0555556	0.0555556	0	0	0	0	0.277778
AD	0	0	0	0	0.0555556	0.0555556	0	0	0	0	0.111111
AD	0.166667	0	0	0	0.0555556	0.0555556	0	0	0.0555556	1	0.333333
AD	0.166667	0.166667	0	0.0555556	0.0555556	0.0555556	0	0	0.0555556	1	0.555556
AD	0.166667	0.166667	0	0.0555556	0.0555556	0.0555556	0	0	0.0555556	1	0.555556
AD	0	0.166667	0.166667	0.0555556	0.0555556	0.0555556	0	0.0555556	0	1	0.555556
AD	0	0.166667	0.166667	0.0555556	0.0555556	0.0555556	0	0.0555556	0	1	0.555556
AD	0.166667	0.166667	0	0	0.0555556	0.0555556	0	0	0	1	0.444444
AD	0.166667	0.166667	0	0.0555556	0.0555556	0.0555556	0	0.0555556	0.0555556	1	0.611111
AD	0.166667	0.166667	0.166667	0.0555556	0.0555556	0.0555556	0	0.0555556	0	1	0.722222
AD	0.166667	0	0	0.0555556	0.0555556	0.0555556	0	0.0555556	0	1	0.388889
AD	0.166667	0.166667	0.166667	0.0555556	0.0555556	0.0555556	0	0.0555556	0	1	0.722222
AD	0	0.166667	0	0.0555556	0.0555556	0.0555556	0	0.0555556	0	1	0.388889
AD	0.166667	0	0.166667	0	0.0555556	0.0555556	0	0	0.0555556	1	0.5
AD	0.166667	0.166667	0	0.0555556	0.0555556	0.0555556	0	0.0555556	0	1	0.555556
